# Supplementary material for: Synthesis and Biological Evaluation of Oleanolic Acid Derivatives as Selective Vascular Endothelial Growth Factor Promoter i-Motif Ligands
Source: PubMed Central journal article supplement (PMC7915724; doi:10.3390/ijms22041711), 2021-02-08
Supplement: ijms-22-01711-s001.pdf [file ijms-22-01711-s001.pdf]

## Supporting Information

### Synthesis and biological evaluation of oleanolic acid derivatives as selective vascular endothelial growth factor promoter i-motif ligands

Huang Zeng<sup>1,†</sup>, Shuangshuang Kang<sup>1,†</sup>, Yu Zhang<sup>1</sup>, Ke Liu<sup>1</sup>, Qian Yu<sup>1</sup>, Ding Li<sup>1,\*</sup> and Lin-Kun An<sup>1,2,\*</sup>

<sup>1</sup> School of Pharmaceutical Sciences, Sun Yat-sen University, Guangzhou 510006, China; zenghuang8006@163.com (H. Zeng); kangshsh@163.com (S. Kang); zhangy553@mail2.sysu.edu.cn (Y. Zhang); ke.liu.19@ucl.ac.uk (K. Liu); yuxi024@163.com (Q. Yu); liding@mail.sysu.edu.cn (D. Li); lssalk@mail.sysu.edu.cn (L.-K. An)<sup>2</sup>

<sup>2</sup> Guangdong Provincial Key Laboratory of New Drug Design and Evaluation, Guangzhou, 510006, China; lssalk@mail.sysu.edu.cn (L.-K. An)

† The first two authors made equal contribution to this work.

\* Correspondence: liding@mail.sysu.edu.cn (D. Li); lssalk@mail.sysu.edu.cn (L.-K. An); Tel.: +86-20 3994 3058 (D. Li); +86-20 3994 3413 (L.-K. An)

## Table of contents

|                                                                                    |    |
|------------------------------------------------------------------------------------|----|
| Scheme S1 .....                                                                    | 3  |
| Scheme S2.....                                                                     | 3  |
| Figure S1.....                                                                     | 4  |
| Figure S2.....                                                                     | 4  |
| Figure S3.....                                                                     | 5  |
| Figure S4.....                                                                     | 5  |
| Figure S5.....                                                                     | 6  |
| Figure S6.....                                                                     | 6  |
| Figure S7.....                                                                     | 7  |
| Figure S8.....                                                                     | 7  |
| Figure S9.....                                                                     | 7  |
| Figure S10.....                                                                    | 8  |
| Figure S11 .....                                                                   | 8  |
| Figure S12.....                                                                    | 8  |
| Table S1. Oligomers, primers or inserted clones used in this study .....           | 9  |
| Synthesis and characterization .....                                               | 12 |
| <sup>1</sup> H-NMR, <sup>13</sup> C-NMR, HRMS spectra of Synthetic Compounds ..... | 44 |

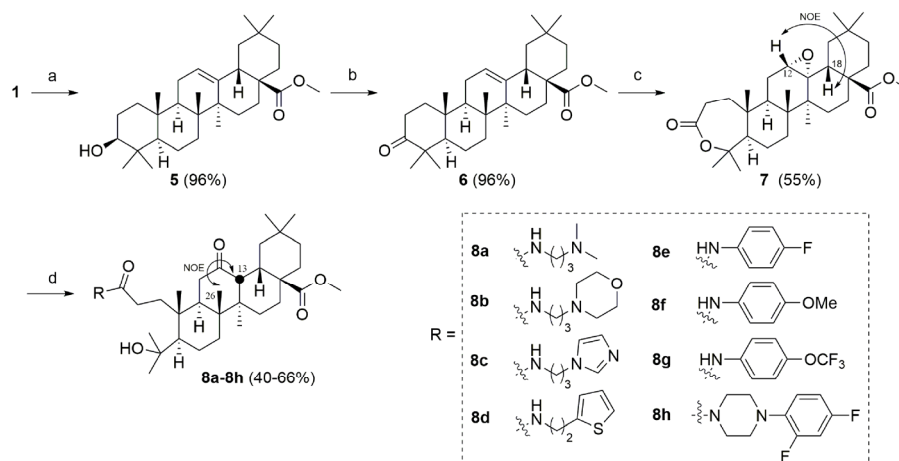

**Scheme S1.** Synthetic route of type II compounds **8a–8h**. Reagents and conditions: (a)  $\text{CH}_3\text{I}$ , DMF,  $\text{K}_2\text{CO}_3$ , r.t., 12 h (yield 96%). (b) Jones reagent, acetone,  $0^\circ\text{C}$ , 1h (yield 96%).(c) *m*-CPBA,  $\text{NaHCO}_3$ , DCM, r.t., 12 h (yield 55%). (d) amines,  $\text{AlCl}_3$ ,  $\text{Et}_3\text{N}$ , DCM,  $0^\circ\text{C}$ , 1 h (yield 40–66%).

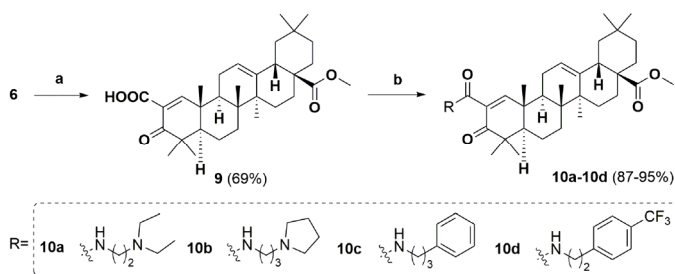

**Scheme S2.** Synthetic route of type III compounds **10a–10d**. Reagents and condition: (a) 1) Stiles's reagent,  $110^\circ\text{C}$ , 1 h; 2) DDQ, toluene, r.t., 0.5 h (yield 69%). (b) HATU, DIPEA, DMF, r.t., 1 h (yield 87–95%).

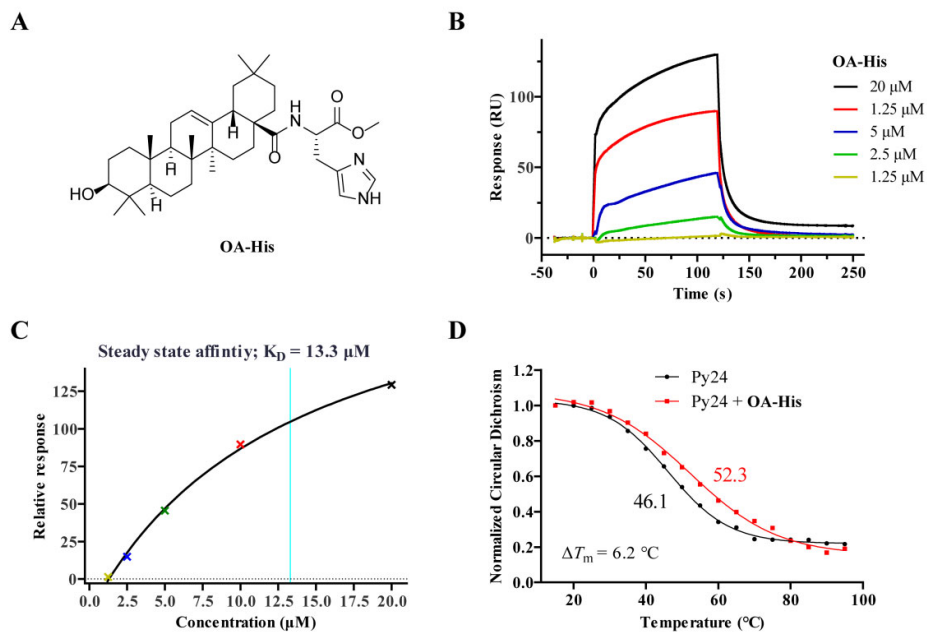

**Figure S1.** (A) The chemical structure of compound **OA-His**. (B, C) Sensorgrams (B) and the corresponding curve fittings (C) for the binding of **OA-His** to Py24 detected by using SPR assay in MES buffer at pH 5.5. (D) The molar ellipticity of CD melting spectra for Py24 without and with addition of 5.0 equivalent of **OA-His** in  $1\times$ BPES under pH 5.5 condition.

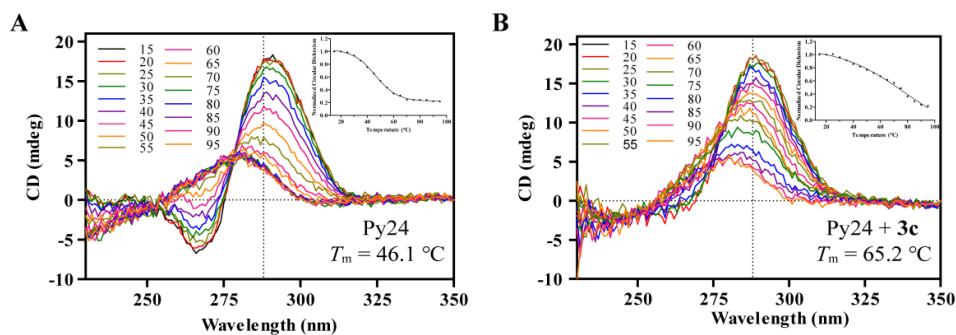

**Figure S2.** The CD melting spectrum for Py24 in the absence (A) and presence (B) of 5 molar equivalents of **3c** in  $1\times$ BPES buffer at pH 5.5. The spectrum was recorded with an interval of  $5^\circ\text{C}$ . The insets showed melting curves and  $T_m$  values were calculated from the CD signals at 288 nm.

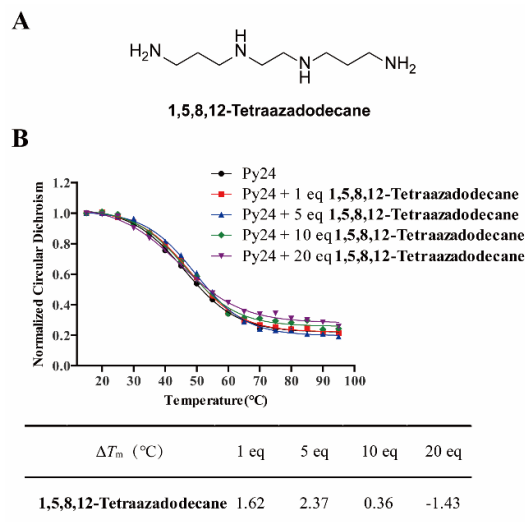

**Figure S3.** (A) The chemical structure of **1,5,8,12-tetraazadodecane**. (B) The molar ellipticity of CD melting spectra for Py24 without and with addition of 1, 5, 10, 20 equivalents of **1,5,8,12-Tetraazadodecane** respectively in 1×BPES at pH 5.5.

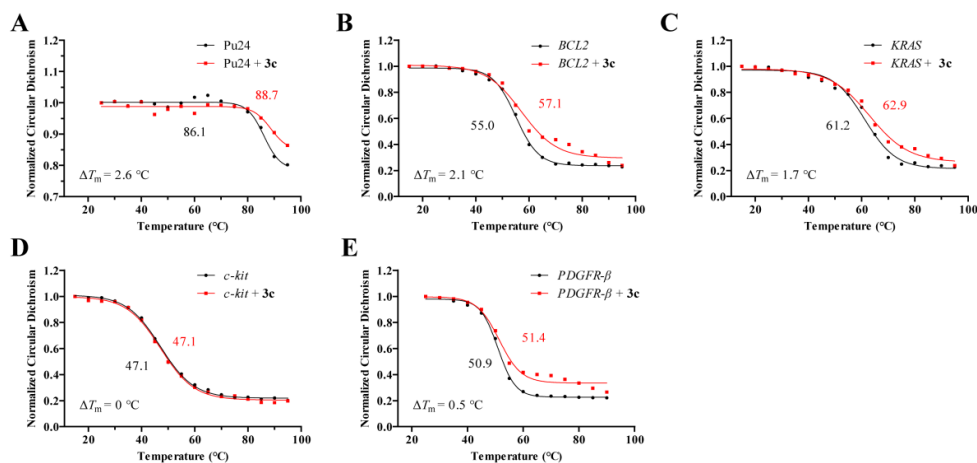

**Figure S4.** The molar ellipticity of CD melting spectra for oligomers without and with addition of 5 equivalents of **3c**. Data was recorded at 266 nm for Pu24 (A). Data was recorded at 288 nm for *BCL2* i-motif (B), *KRAS* i-motif (C), *c-kit* i-motif (D) and *PDGFR-β* i-motif (E).

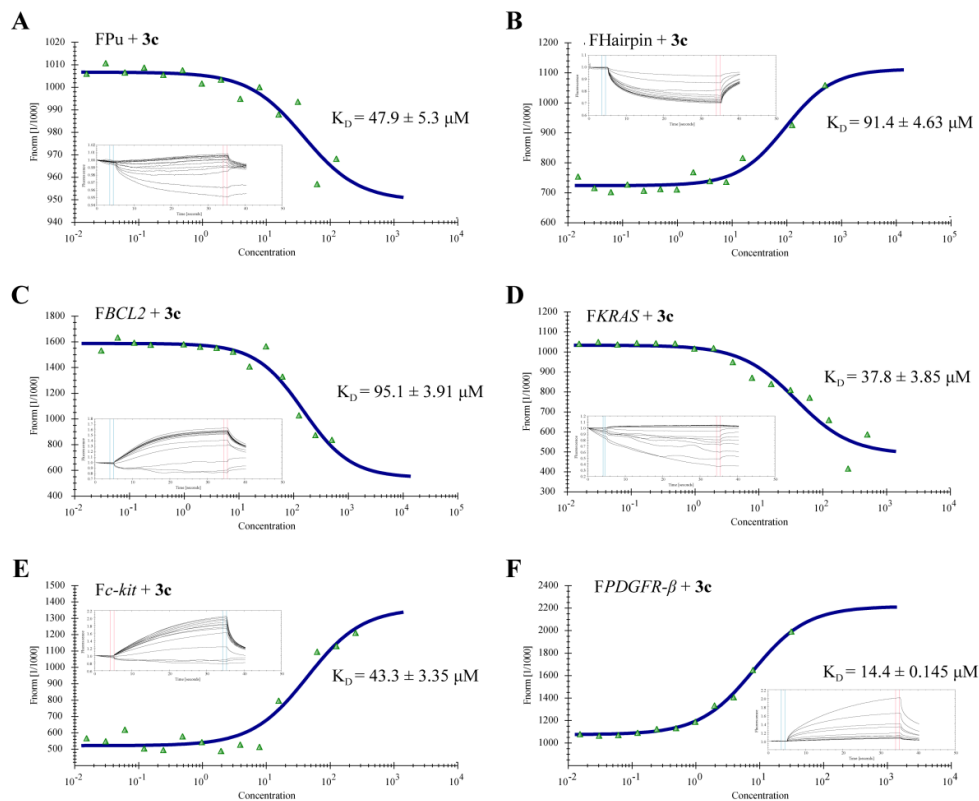

**Figure S5.** The  $K_D$  values were determined to be 47.9  $\mu\text{M}$ , 91.4  $\mu\text{M}$ , 95.1  $\mu\text{M}$ , and 37.8  $\mu\text{M}$ , 43.3  $\mu\text{M}$ , 14.4  $\mu\text{M}$ , respectively through MST for interactions of FPU24 + 3c (A), FHairpin + 3c (B), FBCL2 + 3c (C), FKRAS + 3c (D), Fc-kit + 3c (E), FPDGFR- $\beta$  + 3c (F).

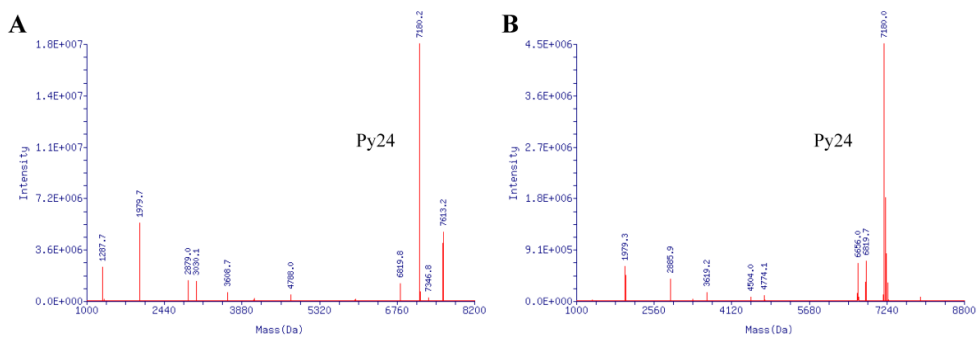

**Figure S6.** ESI-MS spectra of Py24 without (A) and with (B) addition of 3c at pH 7.5.

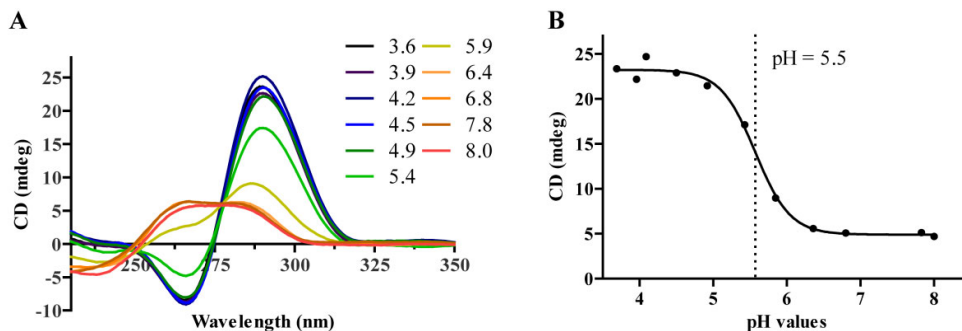

**Figure S7.** (A) CD spectra of Py24 at various pH values. (B) The molar ellipticity of CD spectra for Py24 versus pH values at 288 nm, which was used to determine the transitional pH.

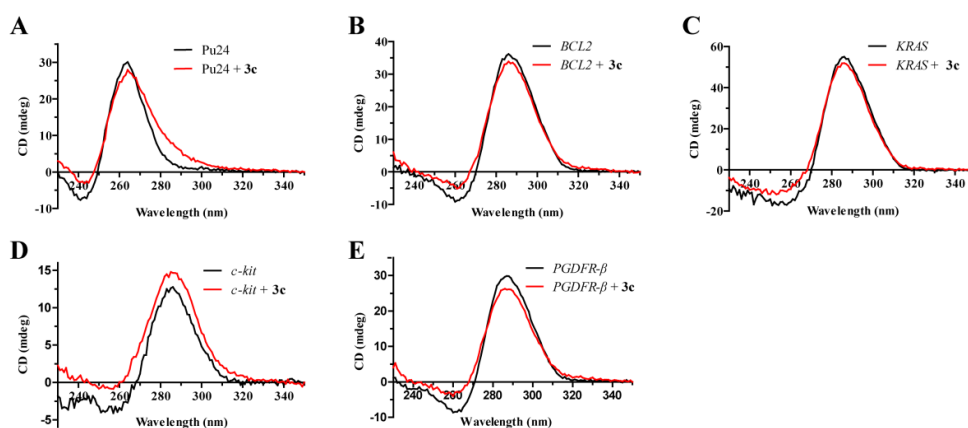

**Figure S8.** CD titration experiments of *VEGF* G-quadruplex and various i-motifs in the absence and presence of **3c**. (A) *VEGF* G-quadruplex (Pu24); (B) *BCL2* i-motif; (C) *KRAS* i-motif; (D) *c-kit* i-motif; (E) *PDGFR-β* i-motif.

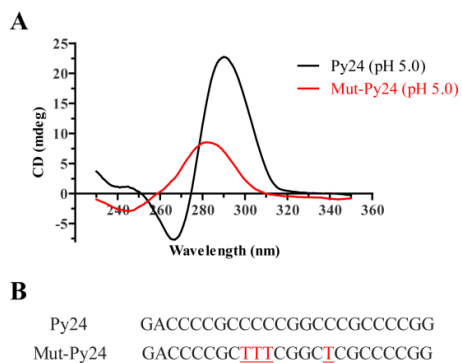

**Figure S9.** Comparison of *VEGF* i-motif-forming (Py24) and Mutated *VEGF* sequences (Mut-Py24). (A) CD spectra of Py24 and Mut-Py24 sequence at pH 5.0. (B) Sequences of Py24 and Mut-Py24.

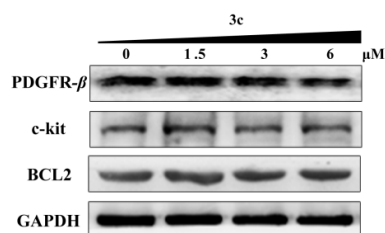

**Figure S10.** Effects of **3c** on protein expressions of *BCL2*, *c-kit*, *PDGFR-β* in MCF-7 cells in the presence or absence of **3c**.

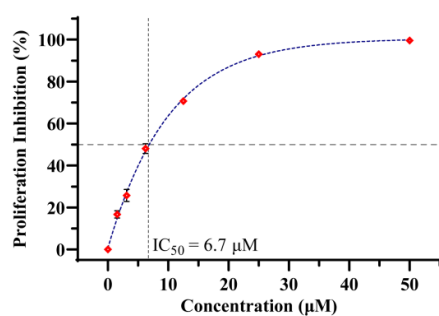

**Figure S11.** The cell growth inhibition curves of MCF-7 cells after a 24 h treatment with **3c** at different concentrations.

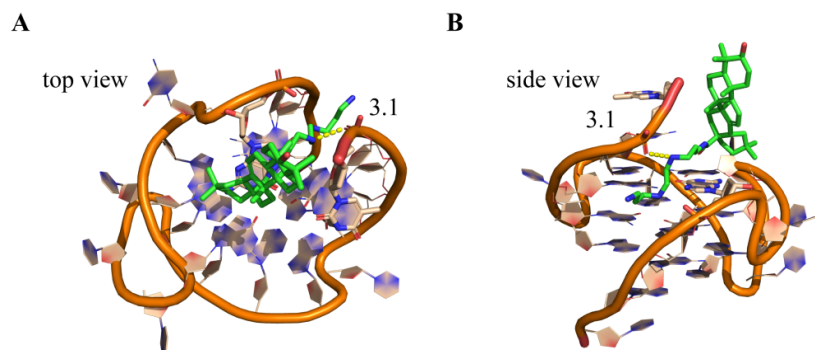

**Figure S12.** Hypothetical binding mode of **3c** to *VEGF* G-quadruplex structures. Top views (**A**) and side-views (**B**) of the interactions of **3c** with *VEGF* G-quadruplex (PDB ID: 2M27).



**Table S1. Oligomers, primers or inserted clones used in this study**

| Oligomer        | Sequence (from 5' to 3')                                          |
|-----------------|-------------------------------------------------------------------|
| Py24            | 5'-GACCCCGCCCCCGCCCCGCCCCGG-3'                                    |
| Pu24            | 5'-CCGGGGCGGGCCGGGGGCGGGGTC-3'                                    |
| <i>PDGFR-β</i>  | 5'-GCGTCCACCCTCCCTGCCCCGCCGCCCCCCTTCTCCCAGC-3'                    |
| <i>BCL2</i>     | 5'-CAGCCCCGCTCCCGCCCCCTTCTCCCGCGCCCGCCCCCT-3'                     |
| <i>KRAS</i>     | 5'-GCCCGGCCCCGCTCCTCCCCCGCCGGCCCCGGCCCCCTCCTTCTCCCCG<br>-3'       |
| <i>c-kit</i>    | 5'-CCCCTCCCTCGCGCCCCGCCCCG-3'                                     |
| Mut-Py24        | 5'-GACCCCGCTTTCGGCTCGCCCCGG-3'                                    |
| FPy24           | 5'-FAM-GACCCCGCCCCCGCCCCGCCCCGG-3'                                |
| FPu24           | 5'-FAM-CCGGGGCGGGCCGGGGGCGGGGTC-3'                                |
| FHairpin        | 5'-FAM-TATAGCTATA-HEG-TATAGCTATA-3'                               |
| <i>FBCL2</i>    | 5'-FAM-CAGCCCCGCTCCCGCCCCCTTCTCCCGCGCCCGCCCCCT-3'                 |
| <i>FKRAS</i>    | 5'-FAM-GCCCGGCCCCCGCTCCTCCCCCGCCGGCCCCGGCCCCCTCCTTCTC<br>CCCG -3' |
| <i>Fc-kit</i>   | 5'-FAM-CCCCTCCCTCGCGCCCCGCCCCG-3'                                 |
| <i>FPDGFR-β</i> | 5'-FAM-GCGTCCACCCTCCCTGCCCCGCCGCCCCCCTTCTCCCAGC-3'                |
| biotin- Py24    | 5'-biotin-GACCCCGCCCCCGCCCCGCCCCGG- 3'                            |
| biotin- Pu24    | 5'-biotin-CCGGGGCGGGCCGGGGGCGGGGTC - 3'                           |
| biotin-Hairpin  | 5'-biotin- TATAGCTATA-HEG-TATAGCTATA- 3'                          |
| FPy24T          | 5'-FAM-GACCCCGCCCCCGCCCCGCCCCGG-TAMRA-3'                          |

  

| Primer                          | Sequence (from 5' to 3') |
|---------------------------------|--------------------------|
| <i>VEGF</i> - forward primer    | CTTCACTTTCGTGATGATT      |
| <i>VEGF</i> - reverse primer    | CTGCTCTACCTCCACCAT       |
| <i>GAPDH</i> - forward primer   | GCTGTAGCCAAATTCGTTGTC    |
| <i>GAPDH</i> - reverse primer   | GATGACATCAAGAAGGTGGTG    |
| <i>BCL2</i> - forward primer    | TGTTGTTCAAACGGGATTCA     |
| <i>BCL2</i> - reverse primer    | CTCAGCCCATCTTCTTCCAG     |
| <i>KRAS</i> - forward primer    | GGTTGCGCTGACCTAGGAAT     |
| <i>KRAS</i> - reverse primer    | TCCATTTGGGGCAAACAGT      |
| <i>c-kit</i> - forward primer   | TATAAACCCTGGCATTATGT     |
| <i>c-kit</i> - reverse primer   | TGCGAAGGAGGCTAAACCTA     |
| <i>PDGFR-β</i> - forward primer | AGGACAACCGTACCTTGGGTGACT |

| Inserted clones               | Sequences for reporter luciferase constructs (from 5' to 3') <sup>a</sup>                                                                                                                                                                                                                                                                                                                                                                                                                                                                                                                                                                                                                                                                                                                                                                                |
|-------------------------------|----------------------------------------------------------------------------------------------------------------------------------------------------------------------------------------------------------------------------------------------------------------------------------------------------------------------------------------------------------------------------------------------------------------------------------------------------------------------------------------------------------------------------------------------------------------------------------------------------------------------------------------------------------------------------------------------------------------------------------------------------------------------------------------------------------------------------------------------------------|
| Wild-type VEGF [1]<br>(582bp) | <p><u>CTCGAG</u>GAGCGAGCAGCGTCTTCGAGAGTGAGGACGTGTG<br/>           TGTCTGTGTGGGTGAGTGAGTGTGTGCGTGTGGGGTTGAGGGCG<br/>           TTGGAGCGGGGAGAAGGCCAGGGGTCCTCCAGGATTCCAATA<br/>           GATCTGTGTGTCCCTCTCCCCACCCGTCCCTGTCCGGCTCTCCGC<br/>           CTCCCCCTGCCCCCTTCAATATTCCTAGCAAAGAGGGAACGGCT<br/>           CTCAGGCCCTGTCCGCACGTAACCTCACTTTCCTGCTCCCTCCTC<br/>           GCCAATGCCCCGCGGGCGCGTGTCTCTGGACAGAGTTTCCGGGG<br/>           GCGGATGGGTAATTTTCAGGCTGTGAACCTTGGTGGGGGTCGAG<br/>           CTCCCCCTCATTGCGGGCGGGCTGCGGGCCAGGCTTCACTGAGC<br/>           GTCCGCAGAGCCCGGGCCCGAGCCGCGTGTGGAAGGGCTGAGG<br/>           CTCGCCTGTCCCCGCCCCC<u>GGGGCGGGCCGGGGCGGGGT</u><br/> <u>CCGGCGGGGCGGAG</u>CCATGCGCCCCCCCCCTTTTTTTTTTAAAA<br/>           GTCGGCTGGTAGCGGGGAGGATCGCGGAGGCTTGGGGCAGCCG<br/>           GGTAGCTCGGAGGTCGTGGCGCTG<u>AAGCTT</u></p> |
| Devoid VEGF [1]<br>(546bp)    | <p><u>CTCGAG</u>GAGCGAGCAGCGTCTTCGAGAGTGAGGACGTGTG<br/>           TGTCTGTGTGGGTGAGTGAGTGTGTGCGTGTGGGGTTGAGGGCG<br/>           TTGGAGCGGGGAGAAGGCCAGGGGTCCTCCAGGATTCCAATA<br/>           GATCTGTGTGTCCCTCTCCCCACCCGTCCCTGTCCGGCTCTCCGC<br/>           CTCCCCCTGCCCCCTTCAATATTCCTAGCAAAGAGGGAACGGCT<br/>           CTCAGGCCCTGTCCGCACGTAACCTCACTTTCCTGCTCCCTCCTC<br/>           GCCAATGCCCCGCGGGCGCGTGTCTCTGGACAGAGTTTCCGGGG<br/>           GCGGATGGGTAATTTTCAGGCTGTGAACCTTGGTGGGGGTCGAG<br/>           CTCCCCCTCATTGCGGGCGGGCTGCGGGCCAGGCTTCACTGAGC<br/>           GTCCGCAGAGCCCGGGCCCGAGCCGCGTGTGGAAGGGCTGAGG<br/>           CTCGCCTGTCCCCGCCCCCCCCATGCGCCCCCCCCCTTTTTTTTTTA<br/>           AAAGTCGGCTGGTAGCGGGGAGGATCGCGGAGGCTTGGGGCAG<br/>           CCGGGTAGCTCGGAGGTCGTGGCGCTG<u>AAGCTT</u></p>                                                      |
| Mutant VEGF<br>(582bp)        | <p><u>CTCGAG</u>GAGCGAGCAGCGTCTTCGAGAGTGAGGACGTGTG<br/>           TGTCTGTGTGGGTGAGTGAGTGTGTGCGTGTGGGGTTGAGGGCG<br/>           TTGGAGCGGGGAGAAGGCCAGGGGTCCTCCAGGATTCCAATA<br/>           GATCTGTGTGTCCCTCTCCCCACCCGTCCCTGTCCGGCTCTCCGC<br/>           CTCCCCCTGCCCCCTTCAATATTCCTAGCAAAGAGGGAACGGCT</p>                                                                                                                                                                                                                                                                                                                                                                                                                                                                                                                                                    |

---

CTCAGGCCCTGTCCGCACGTAACCTCACTTTCCTGCTCCCTCCTC  
GCCAATGCCCCGCGGGCGCGTGTCTCTGGACAGAGTTTCCGGGG  
GCGGATGGGTAATTTTCAGGCTGTGAACCTTGGTGGGGGTCGAG  
CTCCCCCTTCATTGCGGGCGGGCTGCGGGCCAGGCTTCACTGAGC  
GTCCGCAGAGCCCCGGGCCCGAGCCGCGTGTGGAAGGGCTGAGG  
CTCGCCTGTCCCCGCCCCCGGGGGCGAGCCGAAAGCGGGGTCCC  
GGCGGGGCGGAGCCATGCGCCCCCCCCTTTTTTTTTTAAAAGTC  
GGCTGGTAGCGGGGAGGATCGCGGAGGCTTGGGGCAGCCGGGT  
AGCTCGGAGGTCGTGGCGCTGAAGCTT

---

<sup>a</sup> Sequence cloned into pGL4.10 vector (The grey highlighted sequence is the complementary strand of i-motif-forming sequence in *VEGF* promoter. The underlined base among grey highlighted sequence is mutant base. Bold and underlined sequence with six-nucleotide corresponds to the XhoI and HindIII restriction sites)

## Synthesis and characterization

### 1. The synthesis of 1-benzotriazolyl oleanolate (**2**)

The intermediate **2** was synthesized according to the reported method [2]. White solid, m.p. 184.8–186.1 °C (lit. 184.4–185.6 °C [3]). <sup>1</sup>H NMR spectrum was similar to the reported data [3].

### 2. The general synthetic procedure of **3a-3b** and **3d-3q**.

According to the reported method [3], intermediate **2** reacted with the corresponding alkyl amines to give the target products.

#### 2.1. N-propargyl oleanolamide (**3a**).

Yellow solid, yield 93%. m.p. 201.0–202.9 °C (lit. 201.3–202.7 °C [3]). ESI-MS (*m/z*) 494 [M + H]<sup>+</sup>. <sup>1</sup>H NMR spectrum was similar to the reported data [3].

#### 2.2. N-(6-hydroxyhexyl) oleanolamide (**3b**).

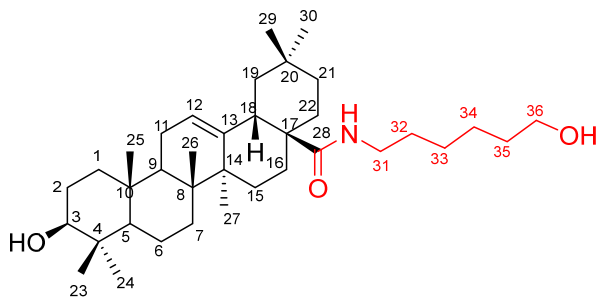

White solid, yield 88%. m.p. 183.3–184.6 °C (lit. 183.8–184.5 °C [4]). <sup>1</sup>H NMR spectrum was similar to the reported data [4].

#### 2.3. N-(2-(1H-imidazol-4-yl)ethyl) oleanolamide (**3d**).

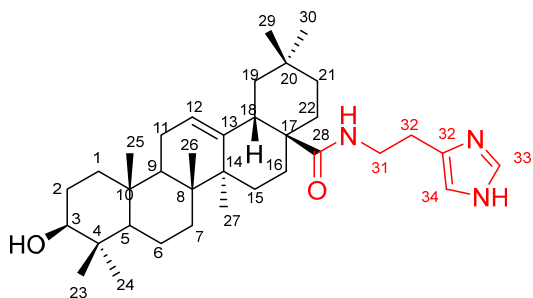

White solid, yield 89%. m.p. 170.6–172.2 °C. IR (KBr):  $\nu = 3356, 2924, 1637, 1463, 754 \text{ cm}^{-1}$ .  $^1\text{H NMR}$  ( $\text{CDCl}_3$ )  $\delta$  7.56 (s, 1H, H-33), 6.80 (s, 1H, H-34), 6.48 (br s, 1H, NH), 5.29 (dd,  $J = 3.1, 3.1 \text{ Hz}$ , 1H, H-12), 3.70 – 3.64 (m, 1H, H-31a), 3.29 (dd,  $J = 10.9, 4.5 \text{ Hz}$ , 1H, H-3), 3.35 – 3.26 (m, 1H, H-31b), 2.80 – 2.75 (m, 2H, H-32), 2.01–1.15 (m, 20H, other aliphatic ring protons), 1.14 (s, 3H,  $\text{CH}_3$ ), 1.08 – 1.02 (m, 1H, H-15b), 0.98 (s, 3H,  $\text{CH}_3$ ), 0.96 – 0.90 (m, 1H, H-1b), 0.90 (s, 3H,  $\text{CH}_3$ ), 0.88 (s, 6H,  $2 \times \text{CH}_3$ ), 0.78 (s, 3H,  $\text{CH}_3$ ), 0.73 – 0.68 (m, 1H, H-5), 0.67 (s, 3H,  $\text{CH}_3$ ).  $^{13}\text{C NMR}$  ( $\text{CDCl}_3$ )  $\delta$  178.67 (C-28), 144.43 (C-13), 134.77 (C-33), 122.99 (C-12), 78.95 (C-3), 55.10 (C-5), 47.55 (C-9), 46.77 (C-17), 46.30 (C-19), 42.03 (C-18), 41.94 (C-14), 39.33 (C-8), 39.11 (C-31), 38.77 (C-4), 38.47 (C-1), 36.95 (C-10), 34.14 (C-21), 32.99 (C-7), 32.57 (C-29), 32.33 (C-22), 30.72 (C-20), 28.10 (C-23), 27.28 (C-15), 27.13 (C-2), 26.80 (C-32), 25.77 (C-27), 23.76 (C-16), 23.56 (C-11), 23.50 (C-30), 18.28 (C-6), 16.83 (C-24), 15.61 (C-25), 15.37 (C-26). HRMS (ESI;  $m/z$ ). Calcd for  $\text{C}_{35}\text{H}_{56}\text{N}_3\text{O}_2$ ,  $[\text{M} + \text{H}]^+$ , 550.4367; found, 550.4379.

#### 2.4. N-(2-(morpholine-4-sulfonamido)ethyl) oleanolamide (**3e**).

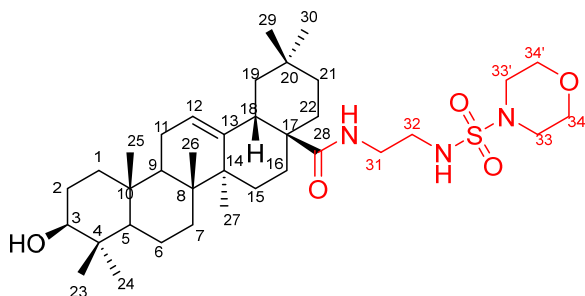

White solid, yield 71%; m.p. 126.9–128.1 °C. IR (KBr):  $\nu = 3403, 2925, 1634, 1153, 940, 727, 525 \text{ cm}^{-1}$ .  $^1\text{H NMR}$  ( $\text{CDCl}_3$ )  $\delta$  6.35 (t,  $J = 6.0 \text{ Hz}$ , 1H, NH), 5.41 (t,  $J = 4.0 \text{ Hz}$ , 1H, H-12), 5.37 (t,  $J = 6.0 \text{ Hz}$ , 1H, NH), 3.78 – 3.70 (m, 4H, H-34, H-34'), 3.29 (dd,  $J = 10.9, 4.5 \text{ Hz}$ , 1H, H-3), 3.33 – 3.07 (m, 8H, H-31, H-32, H-33, H-33'), 2.06 – 1.17 (m, 22H, other aliphatic ring protons), 1.17 (s, 3H,  $\text{CH}_3$ ), 1.08 – 1.02 (m, 1H, H-15b), 0.99 (s, 3H,  $\text{CH}_3$ ), 0.91

(s, 9H, 3×CH<sub>3</sub>), 0.78 (s, 3H, CH<sub>3</sub>), 0.76 (s, 3H, CH<sub>3</sub>); <sup>13</sup>C NMR (CDCl<sub>3</sub>) δ 180.15 (C-28), 144.61 (C-13), 123.19, (C-12) 78.93 (C-3), 66.20 (C-34,C-34'), 55.08 (C-5), 47.51 (C-9), 46.74 (C-17), 46.42 (C-33, C-33'), 46.21 (C-19), 44.27 (C-32), 44.22 (C-18), 42.00 (C-14), 39.83 (C-31), 39.38 (C-8), 38.77 (C-4), 38.44 (C-1), 36.97 (C-10), 34.10 (C-21), 32.98 (C-7), 32.53 (C-29), 32.26 (C-22), 30.73 (C-20), 28.09 (C-23), 27.27 (C-15), 27.13 (C-2), 25.80 (C-27), 23.79 (C-16), 23.56 (C-11), 23.49 (C-30), 18.28 (C-6), 16.94 (C-24), 15.58 (C-25), 15.36 (C-26). HRMS (ESI; *m/z*). Calcd for C<sub>36</sub>H<sub>62</sub>N<sub>3</sub>O<sub>5</sub>S, [M + H]<sup>+</sup>, 648.4405; found, 648.4401.

#### 2.5. N-(2-(2,4-dimethoxybenzamido)ethyl) oleanolamide (**3f**).

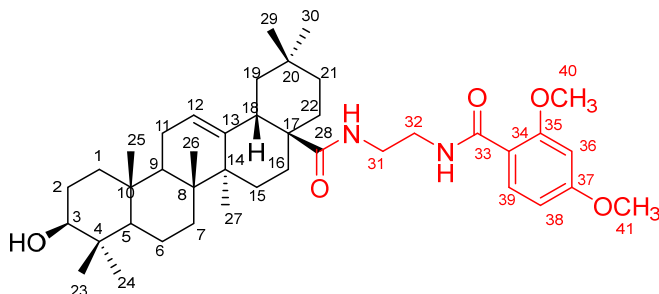

White solid, yield 90%; m.p. 144.2–146.1 °C. IR (KBr):  $\nu$  = 3395, 2926, 1631, 1604, 1521, 1264, 1026 cm<sup>-1</sup>. <sup>1</sup>H NMR (CDCl<sub>3</sub>) δ 8.19 (d, *J* = 8.8 Hz, 1H, H-39), 8.10 (t, *J* = 5.4 Hz, 1H, NH), 6.61 (t, *J* = 5.4 Hz, 1H, NH), 6.59 (dd, *J* = 8.8, 2.3 Hz, 1H, H-38), 6.48 (d, *J* = 2.2 Hz, 1H, H-36), 5.35 (dd, *J* = 3.1, 3.1 Hz, 1H, H-12), 3.95 (s, 3H, H-40), 3.85 (s, 3H, H-41), 3.72 – 3.48 (m, 3H, H-31, H-32a), 3.28 – 3.16 (m, 2H, H-3 H-32b), 2.60 (d, *J* = 16.0 Hz, 1H, H-18), 1.99 – 1.15 (m, 21H, other aliphatic ring protons), 1.11 (s, 3H, CH<sub>3</sub>), 0.97 (s, 3H, CH<sub>3</sub>), 0.94 – 0.92 (m, 1H, H-15b), 0.88 (s, 3H, CH<sub>3</sub>), 0.88 (s, 3H, CH<sub>3</sub>), 0.81 (s, 3H, CH<sub>3</sub>), 0.76 (s, 3H, CH<sub>3</sub>), 0.70 – 0.69 (m, 1H, H-5), 0.67 (s, 3H, CH<sub>3</sub>). <sup>13</sup>C NMR (CDCl<sub>3</sub>) δ 178.80 (C-28), 166.30 (C-33), 163.57 (C-37), 159.02 (C-35), 144.27 (C-12), 134.06 (C-34), 122.95 (C-12), 113.92 (C-39), 105.27 (C-38), 98.45 (C-36), 78.96 (C-3), 55.87 (C-40), 55.54 (C-41), 55.07 (C-5), 47.54 (C-9), 46.70 (C-17), 46.18 (C-19), 41.81 (C-18), 41.64 (C-14), 40.77 (C-31), 39.27 (C-8), 39.00 (C-32), 38.73 (C-4), 38.40 (C-1), 36.92 (C-10), 34.16 (C-21), 33.05 (C-7), 32.78 (C-29), 32.24 (C-22), 30.73 (C-20), 28.08 (C-23), 27.36 (C-15), 27.15 (C-2), 25.86 (C-27), 23.60 (C-16), 23.54 (C-11), 23.34 (C-30), 18.30 (C-6), 16.72 (C-24), 15.57 (C-25), 15.26 (C-26). HRMS (ESI; *m/z*). Calcd for C<sub>41</sub>H<sub>63</sub>N<sub>2</sub>O<sub>5</sub>, [M + H]<sup>+</sup>, 663.4731; found, 663.4752.

#### 2.6. N-(2-(2-(phenylamino)benzamido)ethyl) oleanolamide (**3g**).

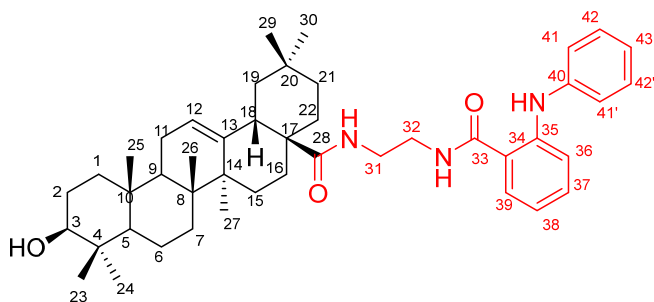

White solid, yield 86%. m.p. 130.7–131.8 °C. IR (KBr):  $\nu = 3342, 2924, 1627, 1519, 1463, 748 \text{ cm}^{-1}$ .  $^1\text{H}$  NMR ( $\text{CDCl}_3$ )  $\delta$  7.55 (br s, 1H, NH), 7.49 (d,  $J = 7.1 \text{ Hz}$ , 1H, H-36), 7.35 (d,  $J = 8.4 \text{ Hz}$ , 1H, H-39), 7.32 – 7.23 (m, 4H, H-37, H-42, H-42', NH), 7.19 (d,  $J = 7.6 \text{ Hz}$ , 2H, H-41, H-41'), 6.99 (t,  $J = 7.3 \text{ Hz}$ , 1H, H-43), 6.76 (t,  $J = 7.5 \text{ Hz}$ , 1H, H-38), 6.47 (t,  $J = 5.4 \text{ Hz}$ , 1H, NH), 5.38 (dd,  $J = 3.1, 3.1 \text{ Hz}$ , 1H, H-12), 3.66 – 3.55 (m, 1H, H-32), 3.55 – 3.48 (m, 2H, H-31, H-31'), 3.46 – 3.32 (m, 1H, H-32'), 3.18 (dd,  $J = 10.9, 4.5 \text{ Hz}$ , 1H, H-3), 2.60 (d,  $J = 15.0 \text{ Hz}$ , 1H, H-18), 2.05 – 1.23 (m, 20H, other aliphatic ring protons), 1.13 (s, 3H,  $\text{CH}_3$ ), 0.94 – 0.92 (m, 1H, H-15b), 0.96 (s, 3H,  $\text{CH}_3$ ), 0.88 (s, 3H,  $\text{CH}_3$ ), 0.85 (s, 3H,  $\text{CH}_3$ ), 0.84 (s, 3H,  $\text{CH}_3$ ), 0.75 (s, 3H,  $\text{CH}_3$ ), 0.72 (s, 3H,  $\text{CH}_3$ ).  $^{13}\text{C}$  NMR (101 MHz,  $\text{CDCl}_3$ )  $\delta$  180.70 (C-28), 170.13 (C-33), 145.75 (C-35), 144.48 (C-13), 141.64 (C-40), 132.16 (C-37), 129.25 (C-42, C-42'), 127.93 (C-39), 123.17 (C-43), 122.27 (C-12), 120.74 (C-41, C-41'), 117.96 (C-33), 117.25 (C-36), 115.22 (C-38), 78.96 (C-3), 55.07 (C-5), 47.49 (C-9), 46.76 (C-17), 46.43 (C-19), 42.00 (C-18, C-32), 41.67 (C-14), 39.46 (C-31), 39.30 (C-8), 38.74 (C-4), 38.44 (C-1), 36.93 (C-10), 34.07 (C-21), 32.95 (C-7), 32.61 (C-29), 32.24 (C-22), 30.69 (C-20), 28.07 (C-23), 27.21 (C-15), 27.15 (C-2), 25.75 (C-27), 23.82 (C-16), 23.48 (C-11), 23.45 (C-30), 18.21 (C-6), 16.82 (C-24), 15.53 (C-25), 15.34 (C-26). HRMS (ESI;  $m/z$ ). Calcd for  $\text{C}_{45}\text{H}_{64}\text{N}_3\text{O}_3$ ,  $[\text{M} + \text{H}]^+$ , 694.4942; found, 694.4936.

2.7. (E)-N-(2-(3-(3,4-dihydroxyphenyl)acrylamido)ethyl) oleanolamide (**3h**).

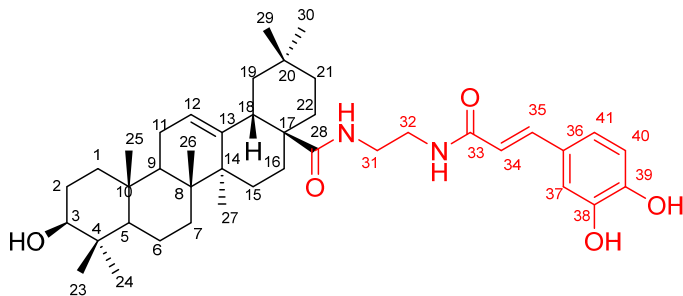

White solid, yield 71%. m.p. 180.4–181.9 °C. IR (KBr):  $\nu = 3357, 2928, 1674, 1522, 1464, 1124, 1045 \text{ cm}^{-1}$ .  $^1\text{H}$

NMR (CDCl<sub>3</sub>)  $\delta$  7.44 (d,  $J$  = 15.6 Hz, 1H, H-35), 7.06 (s, 1H, H-37), 6.92 – 6.78 (m, 2H, H-40, H-41), 6.75 (br s, 1H, NH), 6.21 (d,  $J$  = 15.6 Hz, 1H, H-34), 5.40 (dd,  $J$  = 3.1, 3.1 Hz, 1H, H-12), 3.60 – 3.44 (m, 2H, H-31), 3.43 – 3.32 (m, 1H, H-3), 3.31 – 3.09 (m, 2H, H-32), 2.57 (d,  $J$  = 15.0 Hz, 1H, H-18), 2.19 – 1.13 (m, 24H, other aliphatic ring protons), 1.12 (s, 3H, CH<sub>3</sub>), 0.95 (s, 3H, CH<sub>3</sub>), 0.88 (s, 6H, 2 $\times$ CH<sub>3</sub>), 0.81 (s, 3H, CH<sub>3</sub>), 0.74 (s, 3H, CH<sub>3</sub>), 0.69 (s, 3H, CH<sub>3</sub>). <sup>13</sup>C NMR (126 MHz, CDCl<sub>3</sub>)  $\delta$  180.44 (C-28), 167.97 (C-33), 146.83 (C-39), 144.69 (C-13), 143.95 (C-38), 141.64 (C-35), 127.15 (C-36), 123.25 (C-12), 121.82 (C-34), 117.29 (C-41), 115.31 (C-40), 113.68 (C-37), 78.90 (C-3), 55.03 (C-5), 47.46 (C-9), 46.57 (C-17), 46.36 (C-19), 41.80 (C-18), 41.55 (C-14), 40.10 (C-30), 39.26 (C-29), 38.66 (C-4), 38.33 (C-1), 36.86 (C-10), 34.04 (C-21), 32.92 (C-7), 32.70 (C-29), 32.21 (C-22), 30.64 (C-20), 28.00 (C-23), 27.22 (C-15), 26.86 (C-2), 25.77 (C-27), 23.50 (C-16), 23.45 (C-11, C-30), 18.19 (C-6), 16.77 (C-24), 15.53 (C-25), 15.22 (C-26). HRMS (ESI;  $m/z$ ). Calcd for C<sub>41</sub>H<sub>61</sub>N<sub>2</sub>O<sub>5</sub>, [M + H]<sup>+</sup>, 661.4575; found, 661.4586.

2.8. N-(3-((2-((3-(2-(5-methyl-2,4-dioxo-3,4-dihydropyrimidin-1(2H)-yl)acetamido)propyl)amino)ethyl)amino)propyl)oleanamide (**3i**)

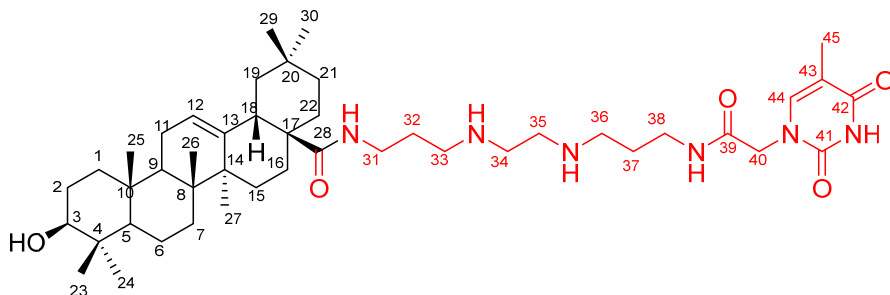

White solid, yield 80%. m.p. 127.0–128.2 °C. IR (KBr):  $\nu$  = 3395, 2926, 1675, 1521, 1464, 1242, 1027 cm<sup>-1</sup>. <sup>1</sup>H NMR (500 MHz, CDCl<sub>3</sub>)  $\delta$  7.99 (s, 1H, NH), 7.27 (s, 1H, NH), 7.11 (s, 1H, H-44), 6.31 (s, 1H, NH), 5.37 (s, 1H, H-12), 4.31 (s, 2H, H-34), 3.50 – 3.31 (m, 4H, H-32, H-38), 3.29 – 3.18 (m, 1H, H-3), 2.91 – 2.61 (m, 8H, H-33, H-34, H-35, H-36), 2.54 (d,  $J$  = 15.0 Hz, 1H, H-18), 1.90 (s, 3H, H-45), 1.81 – 1.18 (m, 28H, the protons of other aliphatic ring and chain), 1.16 (s, 3H, CH<sub>3</sub>), 1.07 – 1.03 (m, 1H, H-15b), 0.99 (s, 3H, CH<sub>3</sub>), 0.90 (s, 9H, 3  $\times$  CH<sub>3</sub>), 0.78 (s, 3H, CH<sub>3</sub>), 0.74 (s, 3H, CH<sub>3</sub>). <sup>13</sup>C NMR (126 MHz, CDCl<sub>3</sub>)  $\delta$  179.05 (C-28), 166.71 (C-39), 164.68 (C-42), 151.64 (C-41), 144.83 (C-13), 140.76 (C-44), 122.86 (C-12), 111.04 (C-43), 78.91 (C-3), 55.09 (C-5), 50.89 (C-40), 48.51 (C-34), 48.38 (C-35), 47.94 (C-36), 47.52 (C-9), 46.75 (C-17), 46.51 (C-33), 46.33 (C-19), 42.13 (C-18), 42.04 (C-14), 39.36 (C-8), 38.82 (C-31), 38.76 (C-4), 38.47 (C-1), 37.19 (C-38), 36.97 (C-10), 34.13



(C-21), 32.97 (C-7), 32.76 (C-29), 32.34 (C-22), 30.73 (C-20), 29.13 (C-32, C-37), 28.10 (C-23), 27.28 (C-15), 27.14 (C-2), 25.78 (C-27), 23.74 (C-16), 23.62 (C-11), 23.53 (C-30), 18.28 (C-6), 16.97 (C-24), 15.60 (C-25), 15.37 (C-26), 12.38 (C-45). HRMS (ESI;  $m/z$ ). Calcd for  $C_{39}H_{61}N_4O_5$ ,  $[M + H]^+$ , 665.4636; found, 665.4637. HRMS (ESI;  $m/z$ ). Calcd for  $C_{45}H_{75}N_6O_5$ ,  $[M + H]^+$ , 779.5793; found, 779.5790.

### 2.9. 1'-(oleanoloyl)-(1,4'-bipiperidin) (**3j**).

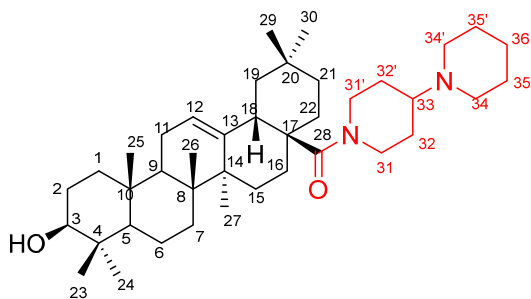

White solid, yield 91%. m.p. 220.1–222.3 °C. IR (KBr):  $\nu = 3496, 2926, 1602, 1464, 1416, 1017 \text{ cm}^{-1}$ .  $^1\text{H}$  NMR ( $\text{CDCl}_3$ )  $\delta$  5.26 (dd,  $J = 3.1, 3.1 \text{ Hz}$ , 1H, H-12), 3.21 (d,  $J = 7.7 \text{ Hz}$ , 1H, H-3), 3.08 (d,  $J = 12.4 \text{ Hz}$ , 1H, H-18), 2.69 (t,  $J = 11.9 \text{ Hz}$ , 2H, H-31), 2.58 – 2.44 (m, 4H, H-31', H-34), 2.16 – 2.15 (m, 33H, other aliphatic ring protons), 1.13 (s, 3H,  $\text{CH}_3$ ), 0.99 (s, 3H,  $\text{CH}_3$ ), 0.92 (s, 3H,  $\text{CH}_3$ ), 0.90 (s, 3H,  $\text{CH}_3$ ), 0.89 (s, 3H,  $\text{CH}_3$ ), 0.78 (s, 3H,  $\text{CH}_3$ ), 0.74 (s, 3H,  $\text{CH}_3$ ).  $^{13}\text{C}$  NMR (101 MHz,  $\text{CDCl}_3$ )  $\delta$  174.82 (C-28), 144.96 (C-13), 121.42 (C-12), 79.06 (C-33), 62.88 (C-34, C-34'), 55.35 (C-5), 50.27 (C-34, C-34'), 47.82 (C-9), 47.40 (C-17), 46.57 (C-19), 45.47 (C-9), 44.89 (C-17), 43.59 (C-14), 41.87 (C-18), 39.12 (C-8), 38.77 (C-4), 38.43 (C-1), 37.13 (C-10), 34.11 (C-21), 33.10 (C-29), 32.93 (C-7), 30.41 (C-22), 29.91 (C-20), 28.66 (C-32, C-32'), 28.12 (C-15), 27.25 (C-23), 26.35 (C-35, C-35'), 25.96 (C-2), 24.74 (C-27), 24.12 (C-16), 23.41 (C-30), 22.86 (C-11), 18.37 (C-6), 16.98 (C-24), 15.57 (C-25), 15.33 (C-26). HRMS (ESI;  $m/z$ ). Calcd for  $C_{40}H_{67}N_2O_2$ ,  $[M + H]^+$ , 607.5197; found, 607.5183.

### 2.10. 1-(oleanoloyl)-(4-(pyrimidin-2-yl)piperazin) (**3k**).

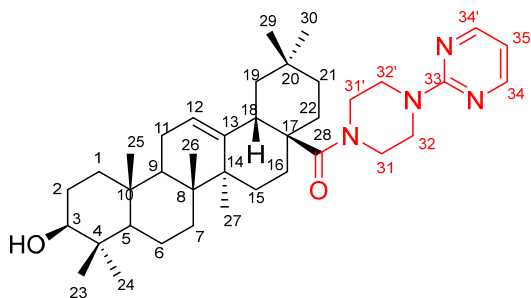

White solid, yield 81%. m.p. 140.4–141.5 °C. IR (KBr):  $\nu = 3444, 2925, 1584, 1456, 982, 728 \text{ cm}^{-1}$ .  $^1\text{H NMR}$  ( $\text{CDCl}_3$ )  $\delta$  8.33 (d,  $J = 15.0 \text{ Hz}$ , 2H, H-34, H-34'), 6.54 (t,  $J = 15.0 \text{ Hz}$ , 1H, H-35), 5.29 (td,  $J = 12.4 \text{ Hz}$ , 1H, H-12), 3.94 – 3.63 (m, 8H, H-31, H-31', H-32, H-32'), 3.20 (dd,  $J = 11.0, 4.5 \text{ Hz}$ , 1H, H-3), 3.11 (d,  $J = 15.0 \text{ Hz}$ , 1H, H-18), 2.20 – 1.17 (m, 22H, other aliphatic ring protons), 1.15 (s, 3H,  $\text{CH}_3$ ), 0.98 (s, 3H,  $\text{CH}_3$ ), 0.94 (s, 3H,  $\text{CH}_3$ ), 0.91 (s, 3H,  $\text{CH}_3$ ), 0.90 (s, 3H,  $\text{CH}_3$ ), 0.77 (s, 3H,  $\text{CH}_3$ ), 0.74 (s, 3H,  $\text{CH}_3$ ).  $^{13}\text{C NMR}$  ( $\text{CDCl}_3$ )  $\delta$  175.36 (C-28), 161.68 (C-33), 157.75 (C-34, C-34'), 144.67 (C-13), 121.68 (C-12), 110.39 (C-35), 78.98 (C-3), 55.31 (C-5), 47.78 (C-32, C-32'), 47.48 (C-31, C-31'), 46.39 (C-19), 45.23 (C-9), 43.81 (C-17), 43.55 (C-14), 41.86 (C-18), 39.15 (C-8), 38.75 (C-4), 38.41 (C-1), 37.09 (C-10), 34.01 (C-21), 33.11 (C-29), 32.83 (C-7), 30.43 (C-22), 30.04 (C-20), 28.12 (C-15), 27.94 (C-23), 27.21 (C-2), 26.02 (C-27), 24.11 (C-16), 23.40 (C-30), 22.85 (C-11), 18.29 (C-6), 16.93 (C-24), 15.60 (C-25), 15.34 (C-26). HRMS (ESI;  $m/z$ ). Calcd for  $\text{C}_{38}\text{H}_{59}\text{N}_4\text{O}_2$ ,  $[\text{M} + \text{H}]^+$ , 603.4633; found, 603.4633.

#### 2.11. 1-(oleanoloyl)-(4-(pyridin-2-yl)piperazin) (31).

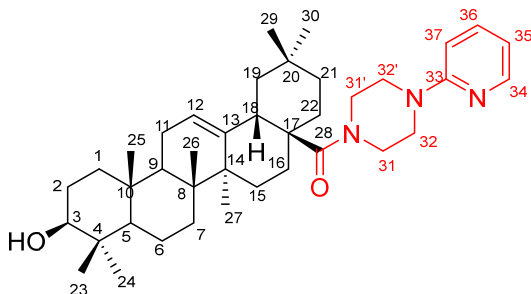

White solid, yield 84%. m.p. 153.3–156.0 °C. IR (KBr):  $\nu = 3444, 2925, 1611, 1507, 1462, 1122, 992, 727 \text{ cm}^{-1}$ .  $^1\text{H NMR}$  ( $\text{CDCl}_3$ )  $\delta$  8.20 (d,  $J = 3.1 \text{ Hz}$ , 1H, H-34), 7.59 – 7.43 (m, 1H, H-36), 6.66 (dd,  $J = 10.2, 4.4 \text{ Hz}$ , 2H, H-35, H-36), 5.28 (s, 1H, H-12), 3.91 – 3.69 (m, 4H, H-32, H-32'), 3.65 – 3.41 (m, 4H, H-31, H-31'), 3.20 (dd,  $J = 15.0, 5.0 \text{ Hz}$ , 1H, H-3), 3.11 (d,  $J = 20.0 \text{ Hz}$ , 1H, H-18), 2.20 – 1.25 (m, 22H, other aliphatic ring protons), 1.14

(s, 3H, CH<sub>3</sub>), 0.97 (s, 3H, CH<sub>3</sub>), 0.94 (s, 3H, CH<sub>3</sub>), 0.91 (s, 3H, CH<sub>3</sub>), 0.89 (s, 3H, CH<sub>3</sub>), 0.77 (s, 3H, CH<sub>3</sub>), 0.74 (s, 3H, CH<sub>3</sub>). <sup>13</sup>C NMR (101 MHz, CDCl<sub>3</sub>) δ 175.31 (C-28), 159.33 (C-33), 147.96 (C-34), 144.71 (C-13), 137.63 (C-36), 121.64 (C-12), 113.84 (C-35), 107.28 (C-37), 79.03 (C-3), 55.30 (C-5), 47.78 (C-32,C-32'), 47.45 (C-31,C-31'), 46.39 (C-19), 45.35 (C-9), 45.12(C-17), 43.53 (C-14), 41.86 (C-18), 39.15 (C-8), 38.76 (C-4), 38.40 (C-1), 37.10 (C-10), 34.01 (C-21), 33.11 (C-29), 32.82 (C-7), 30.44 (C-22), 30.01 (C-20), 28.12 (C-15), 27.94 (C-23), 27.21 (C-2), 26.02 (C-27), 24.10 (C-16), 23.40 (C-30), 22.82 (C-11), 18.30 (C-6), 16.92 (C-24), 15.59 (C-25), 15.35 (C-26). HRMS (ESI; *m/z*). Calcd for C<sub>39</sub>H<sub>60</sub>N<sub>3</sub>O<sub>2</sub>, [M + H]<sup>+</sup>, 602.4680; found, 602.4671.

### 2.12. 1-(oleanoloyl)-(4-(2-methoxyphenyl)piperazin) (**3m**).

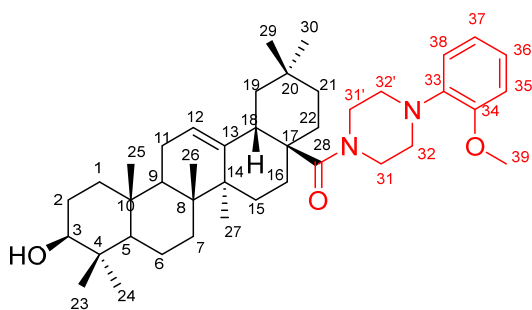

White solid, yield 87%. m.p. 143.9–145.4 °C. IR (KBr):  $\nu = 3444, 2926, 1615, 1507, 1456, 1023, 727 \text{ cm}^{-1}$ . <sup>1</sup>H NMR (CDCl<sub>3</sub>) δ 7.09 – 7.02 (m, 1H, H-37), 6.97 – 6.92 (m, 2H, H-35, H-38), 6.90 – 6.87 (m, 1H, H-36), 5.31 (dd, *J* = 3.1, 3.1 Hz, 1H, H-12), 3.89 (s, 3H, H-39), 3.87 – 3.79 (m, 4H, H-31, H-31'), 3.23 (dd, *J* = 15.0, 5.0 Hz, 1H, H-3), 3.13 (dd, *J* = 16.0, 4.0 Hz, 1H, H-18), 3.09 – 2.97 (m, 4H, H-32, H-32'), 2.20 – 1.29 (m, 21H, other aliphatic ring protons), 1.16 (s, 3H, CH<sub>3</sub>), 1.00 (s, 3H, CH<sub>3</sub>), 0.96 (s, 3H, CH<sub>3</sub>), 0.92 (s, 6H, 2×CH<sub>3</sub>), 0.80 (s, 3H, CH<sub>3</sub>), 0.78 (s, 3H, CH<sub>3</sub>). <sup>13</sup>C NMR (CDCl<sub>3</sub>) δ 175.07 (C-28), 152.25 (C-33), 144.82 (C-13), 140.80 (C-34), 123.36 (C-38), 121.55 (C-12), 121.04 (C-37), 118.28 (C-35), 111.34 (C-3), 79.06 (C-3), 55.42 (C-39), 55.35 (C-5), 50.94 (C-32,C-32'), 47.83 (C-31,C-31'), 47.49 (C-19), 46.46 (C-9), 45.62 (C-17), 43.62 (C-14), 41.91 (C-18), 39.17 (C-8), 38.77 (C-4), 38.43 (C-1), 37.13 (C-10), 34.05 (C-21), 33.11 (C-29), 32.90 (C-7), 30.43 (C-22), 30.07 (C-20), 28.12 (C-15), 27.99 (C-23), 27.24 (C-2), 26.02 (C-27), 24.13 (C-16), 23.42 (C-30), 22.84 (C-11), 18.35 (C-6), 16.97 (C-24), 15.57 (C-25), 15.35 (C-26). HRMS (ESI; *m/z*). Calcd for C<sub>41</sub>H<sub>63</sub>N<sub>2</sub>O<sub>3</sub>, [M + H]<sup>+</sup>, 631.4833; found, 631.4815.

### 2.13. 1-(oleanoloyl)-(4-(3-(trifluoromethyl)phenyl)piperazin) (**3n**).

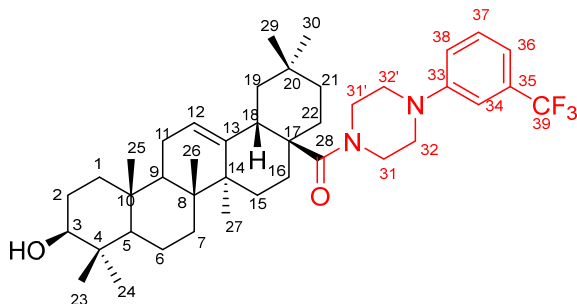

White solid, yield 90%. m.p. 124.3–126.6 °C. IR (KBr):  $\nu = 3444, 2926, 1611, 1507, 1462, 1122, 1004, 727 \text{ cm}^{-1}$ .  $^1\text{H NMR}$  ( $\text{CDCl}_3$ )  $\delta$  7.39 (t,  $J = 7.8 \text{ Hz}$ , 1H, H-37), 7.17 – 7.10 (m, 2H, H-38, H-36), 7.08 (d,  $J = 8.8 \text{ Hz}$ , 1H, H-34), 5.30 (dd,  $J = 3.1, 3.1 \text{ Hz}$ , 1H, H-12), 3.88 – 3.76 (m, 3H, H-31, H-3), 3.53 – 3.46 (m, 1H, H-18), 3.34 – 3.07 (m, 6H, H-31', H-32, H-32'), 2.30 – 1.20 (m, 22H, other aliphatic ring protons), 1.17 (s, 3H,  $\text{CH}_3$ ), 1.00 (s, 3H,  $\text{CH}_3$ ), 0.96 (s, 3H,  $\text{CH}_3$ ), 0.93 (s, 3H,  $\text{CH}_3$ ), 0.92 (s, 3H,  $\text{CH}_3$ ), 0.79 (s, 3H,  $\text{CH}_3$ ), 0.76 (s, 3H,  $\text{CH}_3$ ).  $^{13}\text{C NMR}$  ( $\text{CDCl}_3$ )  $\delta$  175.22 (C-28), 151.03 (C-33), 144.60 (C-13), 131.55(q,  $J = 31.6 \text{ Hz}$ , C-35), 129.66 (C-38), 121.70 (C-12), 121.06 (q,  $J = 272.5 \text{ Hz}$ , C-39), 118.77 (C-34), 116.27 (C-36), 112.12 (C-37), 79.03 (C-3), 55.32 (C-5), 48.82 (C-32, C-32'), 47.79 (C-31), 47.48 (C-31'), 46.64 (C-9), 46.39 (C-19), 45.10 (C-17), 43.55 (C-14), 41.88 (C-18), 39.16 (C-8), 38.76 (C-4), 38.42 (C-1), 37.11 (C-10), 34.01 (C-21), 33.07 (C-29), 32.85 (C-7), 30.42 (C-22), 30.09 (C-20), 28.11 (C-15), 27.96 (C-23), 27.22 (C-2), 25.99 (C-27), 24.08 (C-16), 23.40 (C-30), 22.91 (C-11), 18.32 (C-6), 16.94 (C-24), 15.56 (C-25), 15.35 (C-26). HRMS (ESI;  $m/z$ ). Calcd for  $\text{C}_{41}\text{H}_{60}\text{N}_2\text{O}_2\text{F}_3$ ,  $[\text{M} + \text{H}]^+$ , 669.4601; found, 669.4601.

#### 2.14. 1-(oleanoloyl)-(4-(2,4-difluorophenyl)piperazin) (**30**).

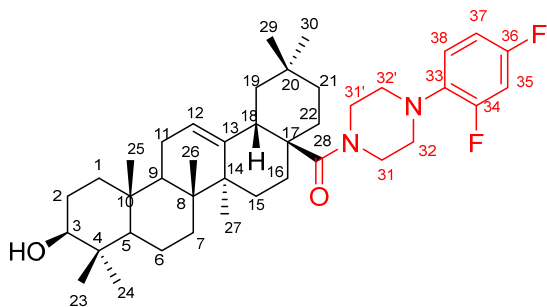

White solid, yield 90%. m.p. 140.1–142.2 °C. IR (KBr):  $\nu = 3444, 2942, 1623, 1507, 1463, 1387, 1276, 1138, 1004, 727 \text{ cm}^{-1}$ .  $^1\text{H NMR}$  ( $\text{CDCl}_3$ )  $\delta$  6.92 – 6.85 (m, 1H, H-35), 6.85 – 6.78 (m, 2H, H-37, H-38), 5.28 (dd,  $J = 3.1, 3.1 \text{ Hz}$ , 1H, H-12), 3.80 (d,  $J = 3.8 \text{ Hz}$ , 4H, H-31, H-31'), 3.21 (dd,  $J = 15.0, 5.0 \text{ Hz}$ , 1H, H-3), 3.11 (dd,  $J = 16.0,$

4.0 Hz, 1H, H-18), 3.06 – 2.92 (m, 4H, H-32, H-32'), 2.21 – 1.27 (m, 22H, other aliphatic ring protons), 1.15 (s, 3H, CH<sub>3</sub>), 0.99 (s, 3H, CH<sub>3</sub>), 0.94 (s, 3H, CH<sub>3</sub>), 0.91 (s, 6H, 2×CH<sub>3</sub>), 0.78 (s, 3H, CH<sub>3</sub>), 0.75 (s, 3H, CH<sub>3</sub>). <sup>13</sup>C NMR (CDCl<sub>3</sub>) δ 175.17 (C-28), 158.24 (dd, J = 272.5, 11.3 Hz, C-34), 155.88 (dd, J = 272.5, 11.3 Hz, C-36), 136.38 (dd, J = 8.8, 2.5 Hz, C-33), 121.62 (C-12), 119.83 (dd, J = 8.8, 3.8 Hz, C-38), 110.92 (dd, J = 21.4, 3.8 Hz, C-37), 104.97 (dd, J = 25.2, 25.2 Hz, C-35), 79.05 (C-3), 55.44 (C-5), 51.30 (C-32,C-32'), 47.92 (C-31,C-31'), 47.62 (C-9), 46.54 (C-19), 45.65 (C-17), 43.73 (C-14), 42.01 (C-18), 39.27 (C-8), 38.89 (C-4), 38.53 (C-1), 37.24 (C-10), 34.16 (C-21), 33.21 (C-29), 33.00 (C-7), 30.55 (C-22), 30.20 (C-20), 28.24 (C-15), 28.09 (C-23), 27.34 (C-2), 26.13 (C-27), 24.21 (C-16), 23.53 (C-30), 22.95 (C-11), 18.47 (C-6), 17.09 (C-24), 15.70 (C-25), 15.48 (C-26). HRMS (ESI; *m/z*). Calcd for C<sub>40</sub>H<sub>59</sub>N<sub>2</sub>O<sub>2</sub>F<sub>2</sub>, [M + H]<sup>+</sup>, 637.4539; found, 637.4531.

2.15. 1-(2-(4-(oleanoloyl)piperazin-1-yl)-2-oxoethyl)-5-methylpyrimidine-2,4(1H,3H)-dione (**3p**).

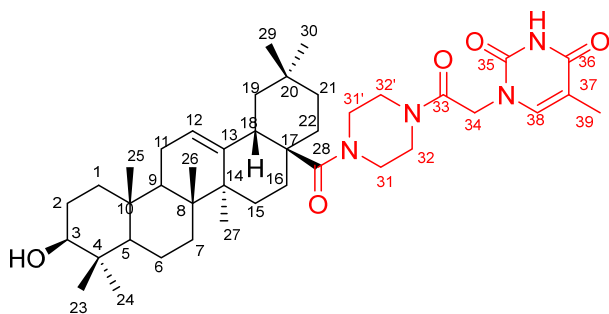

White solid, yield 69%. m.p. 207.8–209.1 °C. IR (KBr):  $\nu$  = 3395, 2926, 1674, 1521, 1464, 1387, 1022 cm<sup>-1</sup>. <sup>1</sup>H NMR (CDCl<sub>3</sub>) δ 9.18 (s, 1H, NH), 7.01 (s, 1H, H-38), 5.27 (dd, J = 3.1, 3.1 Hz, 1H, H-12), 4.53 (d, J = 2.6 Hz, 2H, H-34), 4.00 – 3.41 (m, 9H, H-31, H-31', H-32, H-32', H-3), 3.11 (dd, J = 16.0, 4.0 Hz, 1H, H-18), 1.80 – 1.18 (m, 20H, other aliphatic ring protons), 1.90 (s, 3H, H-39), 1.14 (s, 3H, CH<sub>3</sub>), 0.99 (s, 3H, CH<sub>3</sub>), 0.93 (s, 3H, CH<sub>3</sub>), 0.90 (s, 6H, 2×CH<sub>3</sub>), 0.78 (s, 3H, CH<sub>3</sub>), 0.72 (s, 3H, CH<sub>3</sub>). <sup>13</sup>C NMR (CDCl<sub>3</sub>) δ 175.54 (C-28), 165.13 (C-33), 164.14 (C-36), 151.12 (C-35), 144.40 (C-13), 140.76 (C-38), 121.85 (C-12), 110.97 (C-37), 79.00 (C-3), 55.28 (C-5), 47.73 (C-32,C-32'), 47.57 (C-31,C-31'), 46.29 (C-34), 45.07 (C-19), 44.73 (C-9), 43.54 (C-17), 42.30 (C-14), 41.86 (C-18), 39.14 (C-8), 38.76 (C-4), 38.39 (C-1), 37.09 (C-10), 33.92 (C-21), 33.04 (C-29), 32.82 (C-7), 30.40 (C-22), 30.06 (C-20), 28.12 (C-15), 27.90 (C-23), 27.17 (C-2), 25.98 (C-27), 24.04 (C-16), 23.38 (C-30), 22.80 (C-11), 18.30 (C-6), 16.93 (C-24), 15.60 (C-25), 15.35 (C-26), 12.40 (C-39). HRMS (ESI; *m/z*). Calcd for C<sub>41</sub>H<sub>63</sub>N<sub>4</sub>O<sub>5</sub>, [M + H]<sup>+</sup>, 691.4793; found, 691.4805.

2.16. 7-(2-(4-(oleanoloyl)piperazin-1-yl)-2-oxoethyl)-3,7-dihydro-1H-purine-2,6-dione (**3q**).

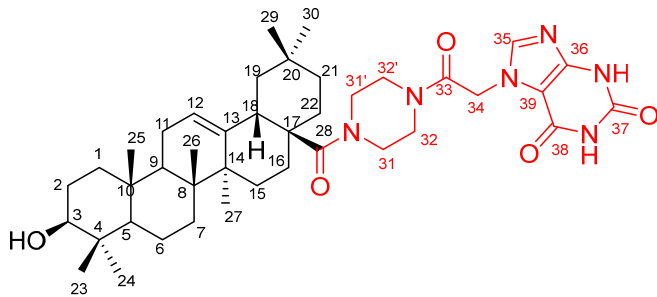

White solid, yield 80%. m.p. 246.1–247.9 °C. IR (KBr):  $\nu = 3395, 2929, 1637, 1521, 1463, 1029, 729 \text{ cm}^{-1}$ .  $^1\text{H}$  NMR ( $\text{CDCl}_3$ )  $\delta$  7.71 (s, 1H, H-35), 5.32 – 5.19 (m, 2H, H-12, H-34), 3.84 – 3.42 (m, 8H, H-31, H-31', H-32, H-32'), 3.23 – 1.18 (m, 26H, other aliphatic ring protons), 1.09 (s, 3H,  $\text{CH}_3$ ), 0.92 (s, 3H,  $\text{CH}_3$ ), 0.87 (s, 3H,  $\text{CH}_3$ ), 0.84 (s, 6H,  $2 \times \text{CH}_3$ ), 0.71 (s, 3H,  $\text{CH}_3$ ), 0.66 (s, 3H,  $\text{CH}_3$ ).  $^{13}\text{C}$  NMR ( $\text{CDCl}_3$ )  $\delta$  175.83 (C-28), 164.74 (C-33), 155.93 (C-38), 151.84 (C-37), 148.82 (C-35), 144.31 (C-13), 143.65 (C-36), 121.85 (C-12), 107.33 (C-39), 78.81 (C-3), 55.23 (C-5), 47.65 (C-32, C-32'), 47.59 (C-31, C-31'), 46.82 (C-19), 46.22 (C-9), 45.02 (C-17), 43.53 (C-14), 42.49 (C-34), 41.81 (C-18), 39.09 (C-8), 38.67 (C-4), 38.37 (C-1), 37.00 (C-10), 33.84 (C-21), 32.95 (C-29), 32.76 (C-7), 30.32 (C-22), 29.96 (C-20), 28.00 (C-15), 27.83 (C-23), 26.85 (C-2), 25.93 (C-27), 23.93 (C-16), 23.34 (C-30), 22.67 (C-11), 18.24 (C-6), 16.79 (C-24), 15.55 (C-25), 15.27 (C-26). HRMS (ESI;  $m/z$ ). Calcd for  $\text{C}_{41}\text{H}_{61}\text{N}_6\text{O}_5$ ,  $[\text{M} + \text{H}]^+$ , 715.4552; found, 715.4563.

3. The synthesis of N-(3-((2-((3-aminopropyl)amino)ethyl)amino)propyl) oleanolamide (**3c**)

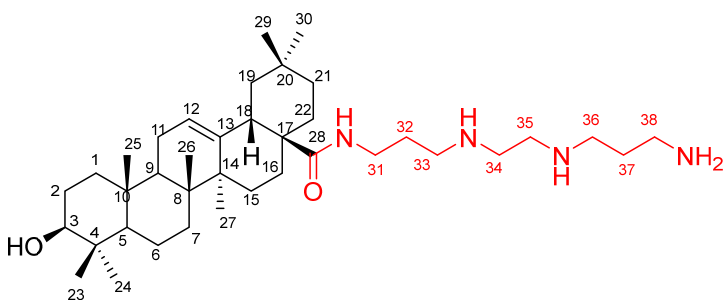

To a solution of **2** (0.50 g, 0.87 mmol) in DMF (6 mL), 1-Boc-1,5,8,12-Tetraazadodecane (0.29 g, 1.04 mmol) and potassium carbonate (0.18 g, 1.30 mmol) were added. The mixture was stirred at room temperature under nitrogen atmosphere for 1 hour, and then added with water (15 mL) and extracted with ethyl acetate ( $3 \times 15 \text{ mL}$ ). The combined organic layer was washed with brine for three times, dried over anhydrous sodium sulfate, filtered,

and concentrated under reduced pressure. The residue was purified by using flush column chromatography on silica gel. The resulting white solid was added to ethyl acetate saturated with hydrogen chloride (5 mL). The mixture was stirred for 7 hours at room temperature. The reaction mixture was filtered, and the filter cake was dissolved in water. The solution was adjusted to pH 7.5 by addition of 1N NaHCO<sub>3</sub> solution. Then the mixture was extracted with diethyl ether (3 × 15 mL). The combined organic layer was dried over Na<sub>2</sub>SO<sub>4</sub> and the solvent was evaporated to afford the target compound as white solid. Yield 80%. m.p. 106.6–107.9 °C. IR (KBr):  $\nu$  = 3315, 2940, 1676, 1540, 1463, 749, 700 cm<sup>-1</sup>. <sup>1</sup>H NMR (CDCl<sub>3</sub>)  $\delta$  6.46 (br s, 1H, NH), 5.35 (dd,  $J$  = 3.1, 3.1 Hz, 1H, H-12), 3.49 – 3.40 (m, 1H, H-31a), 3.21 (dd,  $J$  = 10.9, 4.5 Hz, 1H, H-3), 3.12 – 3.04 (m, 1H, H-31b), 2.89 – 2.59 (m, 10H, H-3, H-33, H-34, H-35, H-36, H-38), 2.01 – 1.18 (m, 30H, protons of other aliphatic ring and chain), 1.16 (s, 3H, CH<sub>3</sub>), 0.99 (s, 3H, CH<sub>3</sub>), 0.91 (s, 9H, 3×CH<sub>3</sub>), 0.78 (s, 3H, CH<sub>3</sub>), 0.76 (s, 3H, CH<sub>3</sub>). <sup>13</sup>C NMR (CDCl<sub>3</sub>)  $\delta$  178.26 (C-28), 144.92 (C-13), 122.65 (C-12), 78.91 (C-3), 55.12 (C-5), 49.38 (C-34), 49.28 (C-35), 47.82 (C-33), 47.78 (C-36), 47.56 (C-9), 46.77 (C-17), 46.22 (C-19), 42.10 (C-18), 42.01, 40.49 (C-14), 39.37 (C-8), 38.77 (C-4), 38.47 (C-1), 38.04 (C-38), 36.98 (C-10), 34.13 (C-21), 33.33 (C-37), 33.02 (C-7), 32.76 (C-29), 32.38 (C-22), 30.75 (C-20), 29.40 (C-32), 28.11 (C-15), 27.32 (C-23), 27.16 (C-2), 25.83 (C-27), 23.68 (C-16), 23.65 (C-11), 23.54 (C-30), 18.30 (C-6), 16.95 (C-24), 15.59 (C-25), 15.37 (C-26). HRMS (ESI;  $m/z$ ). Calcd for C<sub>38</sub>H<sub>69</sub>N<sub>4</sub>O<sub>2</sub>, [M + H]<sup>+</sup>, 613.5415; found, 613.5422.

#### 4. General synthetic procedure of **4a-4o**.

##### 4.1. N-[[1-(2-cyanoethyl)-1H-1,2,3-triazol-4-yl]methyl] oleanolamide (**4a**).

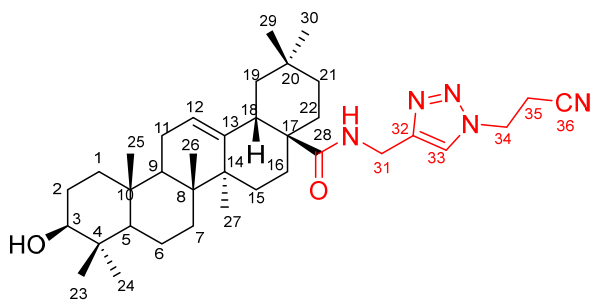

White solid, yield 85%. m.p. 137.6–139.3 °C. IR (KBr):  $\nu$  = 3395, 2928, 1636, 1521, 1463, 1029, 749 cm<sup>-1</sup>. <sup>1</sup>H NMR (400 MHz, CDCl<sub>3</sub>)  $\delta$  7.78 (s, 1H, H-33), 6.78 (br s, 1H, NH), 5.39 (dd,  $J$  = 3.1, 3.1 Hz, 1H, H-12), 4.64 (t,  $J$  = 6.6 Hz, 2H, H-34), 4.52 (dd,  $J$  = 15.0, 5.5 Hz, 1H, H-31a), 4.35 (dd,  $J$  = 15.0, 5.3 Hz, 1H, H-31b), 3.20 (dd,  $J$  = 10.2, 5.0 Hz, 1H, H-3), 3.05 (t,  $J$  = 6.7 Hz, 2H, H-35), 2.69 – 2.42 (m, 1H, H-18), 2.10 – 1.18 (m, 22H, other

aliphatic ring protons), 1.14 (s, 3H, CH<sub>3</sub>), 0.98 (s, 3H, CH<sub>3</sub>), 0.89 (s, 3H, CH<sub>3</sub>), 0.88 (s, 3H, CH<sub>3</sub>), 0.87 (s, 3H, CH<sub>3</sub>), 0.77 (s, 3H, CH<sub>3</sub>), 0.54 (s, 3H, CH<sub>3</sub>). <sup>13</sup>C NMR (CDCl<sub>3</sub>) δ 178.50 (C-28), 145.34 (C-32), 144.22 (C-13), 123.35 (C-12), 123.14 (C-33), 116.37 (C-36), 78.73 (C-3), 55.06 (C-5), 47.47 (C-19), 46.57 (C-9), 46.17 (C-17), 45.47 (C-34), 41.87 (C-31, C-14), 39.28 (C-18), 38.73 (C-8), 38.44 (C-4), 36.89 (C-1), 34.90 (C-10), 34.05 (C-21), 32.99 (C-29), 32.50 (C-7), 32.31 (C-22), 30.67 (C-20), 28.12 (C-15), 27.21 (C-23), 27.12 (C-2), 25.75 (C-27), 23.76 (C-16), 23.58 (C-30), 23.41 (C-11), 19.30 (C-35), 18.24 (C-6), 16.50 (C-24), 15.67 (C-25), 15.36 (C-26). HRMS (ESI; *m/z*). Calcd for C<sub>36</sub>H<sub>56</sub>N<sub>5</sub>O<sub>2</sub>, [M + H]<sup>+</sup>, 590.4429; found, 590.4419.

#### 4.2. 3-(4-((N-(oleanoloyl)aminomethyl)-1H-1,2,3-triazol-1-yl)propanoic acid (**4b**).

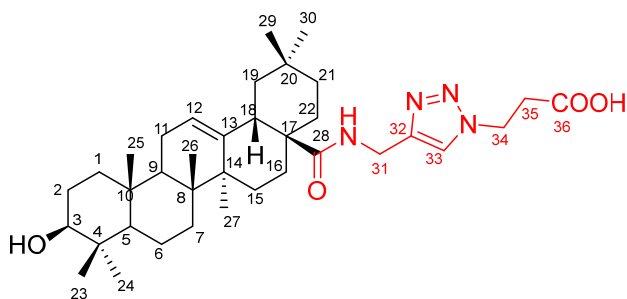

White solid, yield 70%. m.p. 150.3–152.2 °C. IR (KBr):  $\nu = 3418, 2927, 1622, 1508, 1456, 1229, 1025 \text{ cm}^{-1}$ . <sup>1</sup>H NMR (CDCl<sub>3</sub>) δ 7.85 (s, 1H, H-33), 6.85 (t, *J* = 5.5 Hz, 1H, NH), 5.30 (dd, *J* = 3.1, 3.1 Hz, 1H, H-12), 4.65 (t, *J* = 6.1 Hz, 2H, H-34), 4.44 (ddd, *J* = 39.7, 14.9, 5.5 Hz, 2H, H-31), 3.21 (dd, *J* = 10.2, 5.0 Hz, 1H, H-3), 2.97 (t, *J* = 6.1 Hz, 2H, H-35), 2.59 – 2.46 (m, 1H, H-18), 2.10 – 1.17 (m, 23H, other aliphatic ring protons), 1.13 (s, 3H, CH<sub>3</sub>), 0.97 (s, 3H, CH<sub>3</sub>), 0.89 (s, 3H, CH<sub>3</sub>), 0.87 (s, 6H, CH<sub>3</sub>), 0.77 (s, 3H, CH<sub>3</sub>), 0.47 (s, 3H, CH<sub>3</sub>). <sup>13</sup>C NMR (CDCl<sub>3</sub>) δ 178.89 (C-28), 172.70 (C-36), 144.13 (C-32), 143.84 (C-13), 124.12 (C-33), 123.26 (C-12), 79.01 (C-3), 55.08 (C-5), 47.47 (C-19), 46.81 (C-9), 46.51 (C-34), 46.23 (C-17), 45.84 (C-31), 41.82 (C-31), 41.77 (C-14), 39.27 (C-18), 38.71 (C-8), 38.45 (C-4), 36.89 (C-1), 34.62 (C-10), 34.53 (C-21), 34.04 (C-35), 32.99 (C-29), 32.47 (C-7), 32.35 (C-22), 30.67 (C-20), 28.09 (C-15), 27.18 (C-23), 26.99 (C-2), 25.77 (C-27), 23.56 (C-16), 23.55 (C-30), 23.41 (C-11), 18.25 (C-6), 16.35 (C-24), 15.64 (C-25), 15.35 (C-26). HRMS (ESI; *m/z*). Calcd for C<sub>36</sub>H<sub>57</sub>N<sub>4</sub>O<sub>4</sub>, [M + H]<sup>+</sup>, 609.4374; found, 609.4369.

#### 4.3. ethyl 2-(4-((N-(oleanoloyl)aminomethyl)-1H-1,2,3-triazol-1-yl)acetate (**4c**).



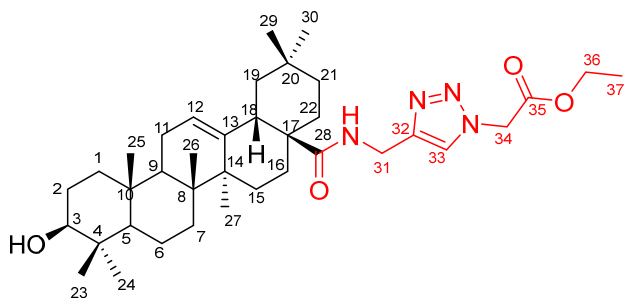

White solid, yield 81%. m.p. 120.3–123.1 °C. IR (KBr):  $\nu = 3418, 2927, 1611, 1508, 1463, 1229, 1025, 727 \text{ cm}^{-1}$ .  $^1\text{H NMR}$  ( $\text{CDCl}_3$ )  $\delta$  7.68 (s, 1H, H-33), 6.65 (t,  $J = 5.3 \text{ Hz}$ , 1H, NH), 5.40 (t,  $J = 3.2 \text{ Hz}$ , 1H, H-12), 5.14 (t,  $J = 10.4 \text{ Hz}$ , 2H, H-34), 4.56 (dd,  $J = 15.0, 5.6 \text{ Hz}$ , 1H, H-31a), 4.37 (dd,  $J = 15.0, 5.3 \text{ Hz}$ , 1H, H-31b), 4.26 (q,  $J = 7.1 \text{ Hz}$ , 2H, H-36), 3.21 (dd,  $J = 11.0, 4.5 \text{ Hz}$ , 1H, H-3), 2.73 – 2.44 (m, 1H, H-18), 2.10 – 1.18 (m, 25H, other aliphatic ring protons), 1.15 (s, 3H,  $\text{CH}_3$ ), 0.98 (s, 3H,  $\text{CH}_3$ ), 0.91 – 0.86 (m, 9H,  $3 \times \text{CH}_3$ ), 0.77 (s, 3H,  $\text{CH}_3$ ), 0.57 (s, 3H,  $\text{CH}_3$ ).  $^{13}\text{C NMR}$  ( $\text{CDCl}_3$ )  $\delta$  178.51 (C-28), 166.13 (C-35), 145.11 (C-32), 144.31 (C-13), 123.96 (C-33), 123.28 (C-12), 78.95 (C-3), 62.44 (C-36), 55.09 (C-5), 50.83 (C-34), 47.54 (C-19), 46.65 (C-9), 46.24 (C-17), 42.02 (C-31), 41.95 (C-14), 39.33 (C-18), 38.75 (C-8), 38.46 (C-4), 36.94 (C-1), 34.98 (C-10), 34.10 (C-21), 33.00 (C-29), 32.42 (C-7), 32.31 (C-22), 30.72 (C-20), 28.09 (C-15), 27.25 (C-23), 27.16 (C-2), 25.77 (C-27), 23.87 (C-16), 23.60 (C-30), 23.46 (C-11), 18.26 (C-6), 16.54 (C-24), 15.57 (C-25), 15.35 (C-26), 14.09 (C-37). HRMS (ESI;  $m/z$ ). Calcd for  $\text{C}_{37}\text{H}_{59}\text{N}_4\text{O}_4$ ,  $[\text{M} + \text{H}]^+$ , 623.4531; found, 623.4528.

#### 4.4. N-[[1-(1-benzyl)-1H-1,2,3-triazol-4-yl]methyl] oleanolamide (**4d**).

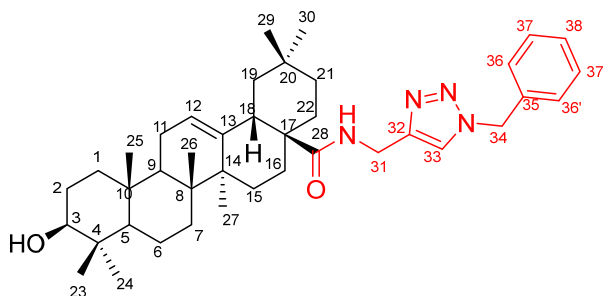

Light yellow solid, yield 79%. m.p. 120.1–122.9 °C. IR (KBr):  $\nu = 3418, 2939, 1637, 1521, 1463, 1048, 698 \text{ cm}^{-1}$ .  $^1\text{H NMR}$  ( $\text{CDCl}_3$ )  $\delta$  7.48 (s, 1H, H-33), 7.38 – 7.32 (m, 2H, H-36, H-36', H-38), 7.30 – 7.23 (m, 2H, H-37, H-37'), 6.60 (s, 1H, NH), 5.48 (q,  $J = 14.8 \text{ Hz}$ , 2H, H-34), 5.37 (dd,  $J = 3.1, 3.1 \text{ Hz}$ , 1H, H-12), 4.48 (dd,  $J = 15.0, 5.5 \text{ Hz}$ , 1H, H-31a), 4.35 (dd,  $J = 15.0, 5.3 \text{ Hz}$ , 1H, H-31b), 3.20 (dd,  $J = 10.2, 5.0 \text{ Hz}$ , 1H, H-3), 2.55 – 2.47 (m, 1H,

H-18), 2.00 – 1.23 (m, 22H, other aliphatic ring protons), 1.13 (s, 3H, CH<sub>3</sub>), 0.98 (s, 3H, CH<sub>3</sub>), 0.89 (s, 3H, CH<sub>3</sub>), 0.87 (s, 3H, CH<sub>3</sub>), 0.85 (s, 3H, CH<sub>3</sub>), 0.78 (s, 3H, CH<sub>3</sub>), 0.46 (s, 3H, CH<sub>3</sub>). <sup>13</sup>C NMR (CDCl<sub>3</sub>) δ 178.34 (C-28), 145.13 (C-32), 144.16 (C-13), 134.56 (C-35), 129.03 (C-37, C-37'), 128.72 (C-38), 128.06 (C-36, C-36'), 123.15 (C-12), 122.54 (C-33), 78.70 (C-3), 55.09 (C-5), 54.09 (C-34), 47.48 (C-19), 46.60 (C-9), 46.16 (C-17), 41.88 (C-14), 39.25 (C-31), 38.73 (C-18), 38.60 (C-8), 38.47 (C-4), 36.88 (C-1), 34.97 (C-10), 34.09 (C-21), 33.00 (C-29), 32.45 (C-7), 32.32 (C-22), 30.67 (C-20), 28.14 (C-15), 27.18 (C-23), 27.13 (C-2), 25.72 (C-27), 23.75 (C-16), 23.58 (C-30), 23.41 (C-11), 18.28 (C-6), 16.46 (C-24), 15.69 (C-25), 15.37 (C-26). HRMS (ESI; *m/z*). Calcd for C<sub>40</sub>H<sub>59</sub>N<sub>4</sub>O<sub>2</sub>, [M + H]<sup>+</sup>, 627.4633; found, 627.4640.

#### 4.5. N-[[1-(3-phenylpropyl)-1H-1,2,3-triazol-4-yl]methyl] oleanolamide (**4e**).

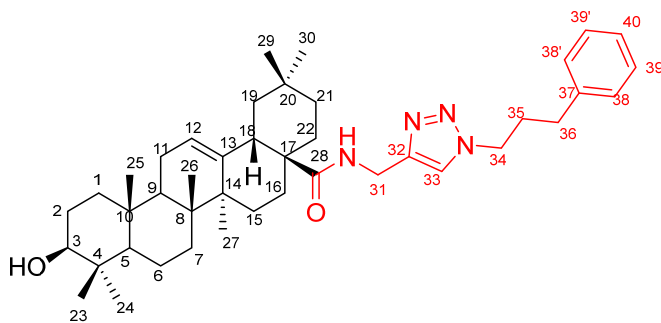

White solid, yield 90%. m.p. 121.3–122.8 °C. IR (KBr):  $\nu = 3418, 2927, 1637, 1520, 1463, 1048, 698 \text{ cm}^{-1}$ . <sup>1</sup>H NMR (CDCl<sub>3</sub>) δ 7.53 (s, 1H, H-33), 7.41 – 7.01 (m, 5H, Ar-H), 6.63 (br s, 1H, NH), 5.39 (s, 1H, H-12), 4.50–4.80 (m, 2H, H-34), 4.46 – 4.23 (m, 2H, H-31), 3.48 (s, 1H, H-3), 3.20 (s, 1H, H-18), 3.00 – 1.41 (m, 25H, protons of other aliphatic ring and chain), 1.13 (s, 3H, CH<sub>3</sub>), 0.97 (s, 3H, CH<sub>3</sub>), 0.89 (s, 3H, CH<sub>3</sub>), 0.88 (s, 3H, CH<sub>3</sub>), 0.83 (s, 3H, CH<sub>3</sub>), 0.75 (s, 3H, CH<sub>3</sub>), 0.51 (s, 3H, CH<sub>3</sub>). <sup>13</sup>C NMR (CDCl<sub>3</sub>) δ 178.46 (C-28), 144.73 (C-32), 144.28 (C-13), 140.14 (C-35), 128.64 (C-39, C-39'), 128.41 (C-38, C-38'), 126.39 (C-40), 123.22 (C-12), 122.60 (C-33), 78.91 (C-3), 55.06 (C-5), 49.52 (C-34), 47.50 (C-19), 46.66 (C-9), 46.22 (C-17), 41.98 (C-14), 41.92 (C-18), 39.30 (C-8), 38.73 (C-4), 38.44 (C-1), 36.90 (C-31), 35.02 (C-10), 34.11 (C-21), 33.00 (C-29), 32.53 (C-36), 32.38 (C-7), 32.33 (C-22), 31.72 (C-36), 30.72 (C-20), 30.18 (C-35), 28.08 (C-15), 27.24 (C-23), 27.15 (C-2), 25.75 (C-27), 23.85 (C-16), 23.59 (C-30), 23.46 (C-11), 18.22 (C-6), 16.55 (C-24), 15.58 (C-25), 15.36 (C-26). HRMS (ESI; *m/z*). Calcd for C<sub>42</sub>H<sub>63</sub>N<sub>4</sub>O<sub>2</sub>, [M + H]<sup>+</sup>, 655.4946; found, 655.4962.

#### 4.6. N-[[1-(2-(dimethylamino)ethyl)-1H-1,2,3-triazol-4-yl]methyl] oleanolamide (**4f**).

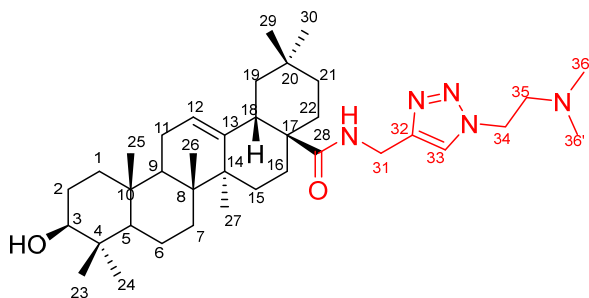

Light yellow solid, yield 70%. m.p. 121.7–123.3 °C. IR (KBr):  $\nu = 3420, 2927, 1637, 1521, 1463, 1048, 729 \text{ cm}^{-1}$ .  $^1\text{H NMR}$  ( $\text{CDCl}_3$ )  $\delta$  7.64 (s, 1H, H-33), 6.63 (t,  $J = 5.2 \text{ Hz}$ , 1H, NH), 5.39 (dd,  $J = 3.1, 3.1 \text{ Hz}$ , 1H, H-12), 4.53 (dd,  $J = 14.9, 5.5 \text{ Hz}$ , 1H, H-31a), 4.41 (t,  $J = 6.4 \text{ Hz}$ , 2H, H-34), 4.35 (dd,  $J = 15.0, 5.2 \text{ Hz}$ , 1H, H-31b), 3.21 (dd,  $J = 11.0, 4.4 \text{ Hz}$ , 1H, H-3), 2.75 (t,  $J = 6.5 \text{ Hz}$ , 1H, H-35), 2.56 (dd,  $J = 16.0, 4.0 \text{ Hz}$ , 1H, H-18), 2.28 (s, 6H, H-36, H-36'), 2.08 – 1.18 (m, 24H, other aliphatic ring protons), 1.14 (s, 3H,  $\text{CH}_3$ ), 0.98 (s, 3H,  $\text{CH}_3$ ), 0.89 (s, 3H,  $\text{CH}_3$ ), 0.88 (s, 3H,  $\text{CH}_3$ ), 0.87 (s, 3H,  $\text{CH}_3$ ), 0.77 (s, 3H,  $\text{CH}_3$ ), 0.54 (s, 3H,  $\text{CH}_3$ ).  $^{13}\text{C NMR}$  ( $\text{CDCl}_3$ )  $\delta$  178.37 (C-28), 144.57 (C-13), 144.27 (C-32), 123.22 (C-12), 122.95 (C-33), 78.95 (C-3), 58.78 (C-35), 55.09 (C-5), 48.16 (C-34), 47.54 (C-19), 46.66 (C-9), 46.24 (C-17), 45.41 (C-36, C-36'), 42.01 (C-31), 41.94 (C-14), 39.33 (C-18), 38.75 (C-8), 38.46 (C-4), 36.95 (C-1), 35.00 (C-10), 34.12 (C-21), 33.00 (C-29), 32.48 (C-7), 32.36 (C-22), 30.72 (C-20), 28.08 (C-15), 27.26 (C-23), 27.16 (C-2), 25.76 (C-27), 23.85 (C-16), 23.58 (C-30), 23.46 (C-11), 18.27 (C-6), 16.54 (C-24), 15.57 (C-25), 15.42 (C-26). HRMS (ESI;  $m/z$ ). Calcd for  $\text{C}_{37}\text{H}_{62}\text{N}_5\text{O}_2$ ,  $[\text{M} + \text{H}]^+$ , 608.4898; found, 608.4901.

4.7. N-[[1-(2-(pyrrolidin-1-yl)ethyl)-1H-1,2,3-triazol-4-yl]methyl] oleanolamide (**4g**).

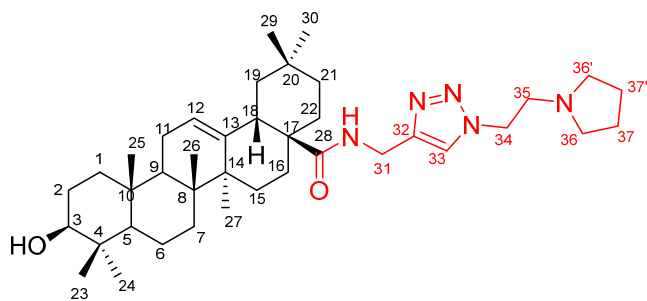

Light yellow solid, yield 70%. m.p. 116.3–117.9 °C. IR (KBr):  $\nu = 3396, 2927, 1638, 1520, 1462, 1047, 731 \text{ cm}^{-1}$ .  $^1\text{H NMR}$  ( $\text{CDCl}_3$ )  $\delta$  7.64 (s, 1H, H-33), 6.62 (t,  $J = 5.3 \text{ Hz}$ , 1H, NH), 5.39 (d,  $J = 3.1 \text{ Hz}$ , 1H, H-12), 4.53 (dd,  $J = 15.0, 5.5 \text{ Hz}$ , 1H, H-31a), 4.45 (t,  $J = 6.7 \text{ Hz}$ , 2H, H-34), 4.35 (dd,  $J = 15.0, 5.3 \text{ Hz}$ , 1H, H-31b), 3.21 (dd,  $J = 11.0,$

4.6 Hz, 1H, H-3), 2.94 (t,  $J = 6.7$  Hz, 2H, H-31), 2.66 – 2.45 (m, 5H, H-18, H-36, H-36'), 2.09 – 1.18 (m, 26H, other aliphatic ring protons), 1.14 (s, 3H, CH<sub>3</sub>), 0.98 (s, 3H, CH<sub>3</sub>), 0.90 (s, 3H, CH<sub>3</sub>), 0.88 (s, 3H, CH<sub>3</sub>), 0.87 (s, 3H, CH<sub>3</sub>), 0.77 (s, 3H, CH<sub>3</sub>), 0.53 (s, 3H, CH<sub>3</sub>). <sup>13</sup>C NMR (CDCl<sub>3</sub>)  $\delta$  178.32 (C-28), 144.59 (C-13), 144.28 (C-32), 123.21 (C-12), 122.93 (C-33), 78.90 (C-3), 55.57 (C-35), 55.08 (C-5), 54.12 (C-36, C-36'), 49.32 (C-34), 47.52 (C-19), 46.65 (C-9), 46.22 (C-17), 42.01 (C-31), 41.93 (C-14), 39.32 (C-18), 38.75 (C-8), 38.45 (C-4), 36.94 (C-1), 34.98 (C-10), 34.12 (C-21), 33.01 (C-29), 32.47 (C-7), 32.35 (C-22), 30.72 (C-20), 28.10 (C-15), 27.26 (C-23), 27.17 (C-2), 25.76 (C-27), 23.83 (C-16), 23.60 (C-30), 23.57 (C-37, C-37'), 23.46 (C-11), 18.27 (C-6), 16.54 (C-24), 15.58 (C-25), 15.42 (C-26). HRMS (ESI;  $m/z$ ). Calcd for C<sub>39</sub>H<sub>64</sub>N<sub>5</sub>O<sub>2</sub>, [M + H]<sup>+</sup>, 634.5055; found, 634.5058.

4.8. N-[[1-(3-(pyrrolidin-1-yl)propyl)-1H-1,2,3-triazol-4-yl]methyl] oleanolamide (**4h**).

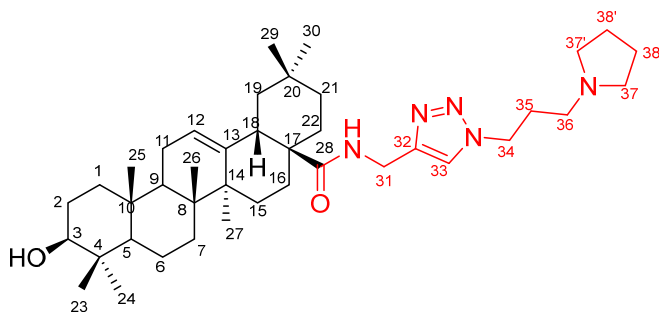

White solid, yield 78%. m.p. 120.9–122.5 °C. IR (KBr):  $\nu = 3397, 2927, 1635, 1520, 1463, 1029, 730$  cm<sup>-1</sup>. <sup>1</sup>H NMR (CDCl<sub>3</sub>)  $\delta$  7.55 (s, 1H, H-33), 6.64 (br s, 1H, NH), 5.39 (s, 1H, H-12), 4.64 - 4.28 (m, 4H, H-34, H-31), 3.28 (dd,  $J = 10.2, 5.0$  Hz, 1H, H-3), 3.00 – 1.18 (m, 34H, protons of other aliphatic ring and chain), 1.14 (s, 3H, CH<sub>3</sub>), 0.98 (s, 3H, CH<sub>3</sub>), 0.89 (s, 9H, 3 × CH<sub>3</sub>), 0.88 (s, 3H, CH<sub>3</sub>), 0.87 (s, 1H), 0.77 (s, 3H, CH<sub>3</sub>), 0.53 (s, 3H, CH<sub>3</sub>). <sup>13</sup>C NMR (CDCl<sub>3</sub>)  $\delta$  178.35 (C-28), 144.56 (C-13), 144.28 (C-32), 123.22 (C-12), 122.74 (C-33), 78.87 (C-3), 55.09 (C-5), 54.04 (C-37, C-37'), 52.66 (C-36), 48.31 (C-34), 47.53 (C-19), 46.65 (C-9), 46.22 (C-17), 42.00 (C-31), 41.93 (C-14), 39.32 (C-18), 38.75 (C-8), 38.46 (C-4), 36.93 (C-1), 35.01 (C-10), 34.11 (C-21), 33.00 (C-29), 32.48 (C-7), 32.36 (C-22), 30.71 (C-20), 29.47 (C-35), 28.10 (C-15), 27.26 (C-23), 27.17 (C-2), 25.75 (C-27), 23.84 (C-16), 23.60 (C-30), 23.48 (C-38, C-38', C-11), 18.27 (C-6), 16.54 (C-24), 15.58 (C-25), 15.39 (C-26). HRMS (ESI;  $m/z$ ). Calcd for C<sub>40</sub>H<sub>66</sub>N<sub>5</sub>O<sub>2</sub>, [M + H]<sup>+</sup>, 648.5211; found, 648.5200.

4.9. N-[[1-(2-morpholinoethyl)-1H-1,2,3-triazol-4-yl]methyl] oleanolamide (**4i**).

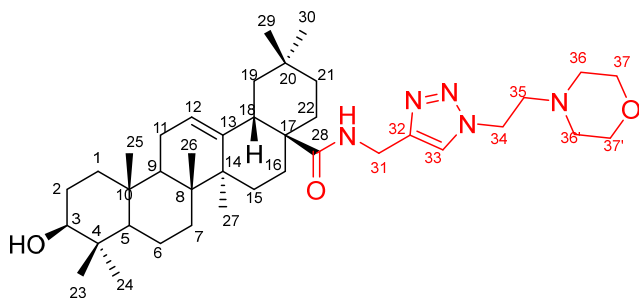

Light yellow solid, yield 78%. m.p. 130.1–131.8 °C. IR (KBr):  $\nu = 3419, 2926, 2852, 1641, 1521, 1457, 1116, 757$   $\text{cm}^{-1}$ .  $^1\text{H NMR}$  ( $\text{CDCl}_3$ )  $\delta$  7.67 (s, 1H, H-33), 6.67 (br s, 1H, NH), 5.39 (dd,  $J = 3.1, 3.1$  Hz, 1H, H-12), 4.55 (dd,  $J = 15.0, 5.5$  Hz, 1H, H-31a), 4.46 – 4.39 (m, 2H, H-34), 4.30 (dd,  $J = 15.0, 5.3$  Hz, 1H, H-31b), 3.69 (s, 4H, H-37, H-37'), 3.48 (s, 1H, H-3), 3.21 (d,  $J = 7.6$  Hz, 1H, H-18), 2.81 (dd,  $J = 8.1, 4.2$  Hz, 2H, H-35), 2.56 (dd,  $J = 16.0, 4.0$  Hz, 1H, H-18), 2.50 – 2.43 (m, 4H, H-36, H-36'), 2.18 – 1.18 (m, 20H, other aliphatic ring protons), 1.14 (s, 3H,  $\text{CH}_3$ ), 0.98 (s, 3H,  $\text{CH}_3$ ), 0.93 – 0.84 (m, 9H,  $3 \times \text{CH}_3$ ), 0.77 (s, 3H,  $\text{CH}_3$ ), 0.54 (s, 3H,  $\text{CH}_3$ );  $^{13}\text{C NMR}$  ( $\text{CDCl}_3$ )  $\delta$  178.43 (C-28), 144.68 (C-13), 144.26 (C-32), 123.21 (C-12), 123.10 (C-33), 78.88 (C-3), 66.83 (C-37, C-37'), 57.93 (C-35), 55.08 (C-5), 53.51 (C-36, C-36'), 47.51 (C-19), 47.34 (C-34), 46.62 (C-9), 46.22 (C-17), 41.97 (C-31), 41.93 (C-14), 39.31 (C-18), 38.75 (C-8), 38.45 (C-4), 36.93 (C-1), 34.96 (C-10), 34.09 (C-21), 32.98 (C-29), 32.49 (C-7), 32.35 (C-22), 30.70 (C-20), 28.09 (C-15), 27.25 (C-23), 27.13 (C-2), 25.76 (C-27), 23.81 (C-16), 23.57 (C-30), 23.45 (C-11), 18.27 (C-6), 16.54 (C-24), 15.59 (C-25), 15.41 (C-26). HRMS (ESI;  $m/z$ ). Calcd for  $\text{C}_{39}\text{H}_{64}\text{N}_5\text{O}_2$ ,  $[\text{M} + \text{H}]^+$ , 650.5004; found, 650.4993.

#### 4.10. N-[[1-(3-morpholinopropyl)-1H-1,2,3-triazol-4-yl]methyl] oleanolamide (**4j**).

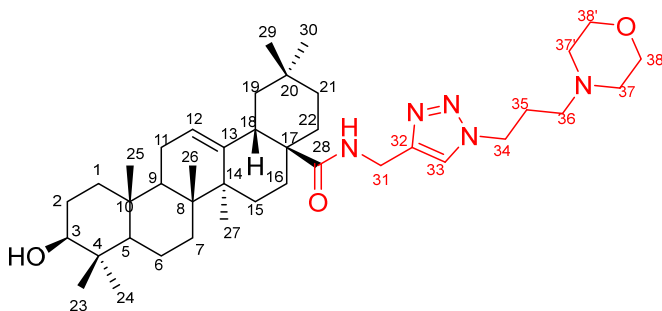

Light yellow solid, yield 79%. m.p. 116.7–118.3 °C. IR (KBr):  $\nu = 3395, 2941, 1635, 1520, 1457, 1324, 1118, 749$   $\text{cm}^{-1}$ .  $^1\text{H NMR}$  ( $\text{CDCl}_3$ )  $\delta$  7.64 – 7.45 (m, 1H, H-33), 6.62 (br s, 1H, NH), 5.38 (dd,  $J = 3.1, 3.1$  Hz, 1H, H-12), 4.55 – 4.25 (m, 4H, H-31, H-34), 3.77 – 3.60 (m, 4H, H-38, H-38'), 3.70 (d,  $J = 3.7$  Hz, 4H), 3.18 (s, 1H, H-3),

, 2.65 – 2.21 (m, 8H, H-35, H-36, H-37, H-37'), 2.18 – 1.20 (m, 23H, other aliphatic ring protons), 1.14 (s, 3H, CH<sub>3</sub>), 0.98 (s, 3H, CH<sub>3</sub>), 0.87 (s, 9H, 3 × CH<sub>3</sub>), 0.77 (s, 3H, CH<sub>3</sub>), 0.53 (s, 3H, CH<sub>3</sub>). <sup>13</sup>C NMR (CDCl<sub>3</sub>) δ 178.43 (C-28), 144.63 (C-13), 144.29 (C-32), 123.22 (C-12), 122.88 (C-33), 78.88 (C-3), 66.94 (C-38, C-38'), 55.07 (C-5), 54.99 (C-36), 53.54 (C-37, C-37'), 48.01 (C-34), 47.51 (C-19), 46.65 (C-9), 46.22 (C-17), 41.99 (C-31), 41.94 (C-14), 39.31 (C-18), 38.75 (C-8), 38.45 (C-4), 36.93 (C-1), 35.00 (C-10), 34.10 (C-21), 32.99 (C-29), 32.47 (C-7), 32.35 (C-22), 30.71 (C-20), 28.09 (C-15), 27.25 (C-23), 27.15 (C-2), 27.05 (C-35), 25.75 (C-27), 23.85 (C-16), 23.59 (C-30), 23.46 (C-11), 18.26 (C-6), 16.57 (C-24), 15.59 (C-25), 15.39 (C-26). HRMS (ESI; *m/z*). Calcd for C<sub>40</sub>H<sub>66</sub>N<sub>5</sub>O<sub>3</sub>, [M + H]<sup>+</sup>, 664.5160; found, 664.5158.

4.11. N-[[1-(pyrimidin-2-yl)-1H-1,2,3-triazol-4-yl]methyl] oleanolamide (**4k**).

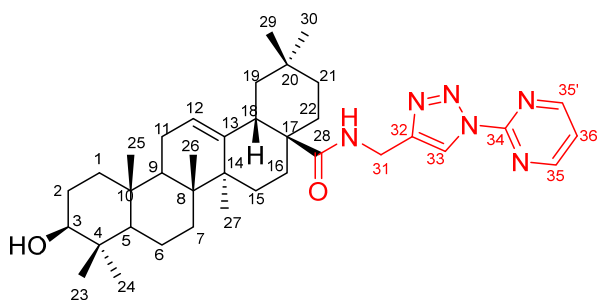

White solid, yield 83%. m.p. 120.9–122.2 °C. IR (KBr):  $\nu = 3393, 2927, 1635, 1521, 1462, 1324, 1127, 741 \text{ cm}^{-1}$ . <sup>1</sup>H NMR (CDCl<sub>3</sub>) δ 8.87 (d, *J* = 4.6 Hz, 2H, H-35, H-35'), 8.58 (s, 1H, H-36), 7.41 (d, *J* = 4.5 Hz, 1H, H-33), 6.69 (s, 1H, NH), 5.38 (dd, *J* = 3.1, 3.1 Hz, 1H, H-12), 4.66 (dd, *J* = 15.0, 5.1 Hz, 1H, H-31a), 4.47 (dd, *J* = 15.0, 4.7 Hz, 1H, H-31b), 3.20 (dd, *J* = 10.2, 5.0 Hz, 1H, H-3), 2.56 (dd, *J* = 16.0, 4.0 Hz, 1H, H-18), 2.18 – 1.20 (m, 23H, other aliphatic ring protons), 1.14 (s, 3H, CH<sub>3</sub>), 0.97 (s, 3H, CH<sub>3</sub>), 0.89 (s, 3H, CH<sub>3</sub>), 0.88 (s, 3H, CH<sub>3</sub>), 0.79 (s, 3H, CH<sub>3</sub>), 0.75 (s, 3H, CH<sub>3</sub>), 0.57 (s, 3H, CH<sub>3</sub>). <sup>13</sup>C NMR (CDCl<sub>3</sub>) δ 178.41 (C-28), 159.28 (C-35, C-35'), 154.40 (C-34), 145.21 (C-32), 144.24 (C-13), 123.30 (C-12), 121.70 (C-33), 120.75 (C-36), 78.89 (C-3), 55.06 (C-5), 47.53 (C-19), 46.60 (C-9), 46.27 (C-17), 42.07 (C-31), 41.92 (C-14), 39.33 (C-18), 38.72 (C-8), 38.43 (C-4), 36.91 (C-1), 34.85 (C-10), 34.09 (C-21), 33.01 (C-29), 32.49 (C-7), 32.32 (C-22), 30.71 (C-20), 28.08 (C-15), 27.29 (C-23), 27.15 (C-2), 25.75 (C-27), 23.81 (C-16), 23.59 (C-30), 23.45 (C-11), 18.23 (C-6), 16.64 (C-24), 15.56 (C-25), 15.24 (C-26). HRMS (ESI; *m/z*). Calcd for C<sub>37</sub>H<sub>55</sub>N<sub>6</sub>O<sub>2</sub>, [M + H]<sup>+</sup>, 615.4381; found, 615.4361.

4.12. N-[[1-(4-(trifluoro methyl)benzyl)-1H-1,2,3-triazol-4-yl]methyl] oleanolamide (**4l**).

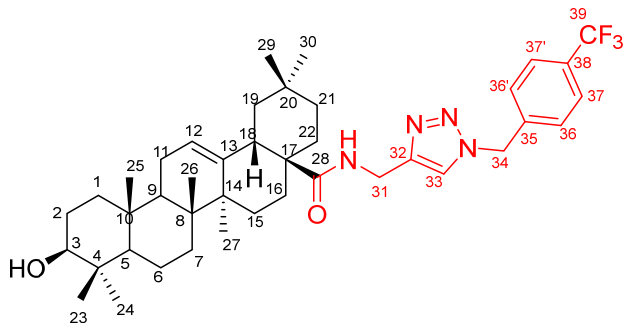

White solid, yield 76%. m.p. 129.9.1–131.4 °C. IR (KBr):  $\nu = 3395, 2928, 1636, 1521, 1463, 1323, 1125, 741$   $\text{cm}^{-1}$ .  $^1\text{H}$  NMR ( $\text{CDCl}_3$ )  $\delta$  7.62 (d,  $J = 7.9$  Hz, 2H, H-37, H-37'), 7.57 (s, 1H, H-33), 7.37 (d,  $J = 7.9$  Hz, 2H, H-36, H-36'), 6.64 (br s, 1H, NH), 5.55 (q,  $J = 15.2$  Hz, 2H, H-34), 5.38 (s, 1H, H-12), 4.49 (dd,  $J = 15.0, 5.4$  Hz, 1H, H-31a), 4.35 (dd,  $J = 15.0, 5.3$  Hz, 1H, H-31b), 3.20 (dd,  $J = 10.2, 5.0$  Hz, 1H, H-3), 2.56 (dd,  $J = 16.0, 4.0$  Hz, 1H, H-18), 2.10 – 1.20 (m, 23H, other aliphatic ring protons), 1.13 (s, 3H,  $\text{CH}_3$ ), 0.98 (s, 3H,  $\text{CH}_3$ ), 0.89 (s, 3H,  $\text{CH}_3$ ), 0.87 (s, 3H,  $\text{CH}_3$ ), 0.85 (s, 3H,  $\text{CH}_3$ ), 0.77 (s, 3H,  $\text{CH}_3$ ), 0.48 (s, 3H,  $\text{CH}_3$ ).  $^{13}\text{C}$  NMR ( $\text{CDCl}_3$ )  $\delta$  178.53 (C-28), 145.52 (C-13), 144.28 (C-32), 138.59 (C-35), 130.93 (q,  $J = 31.3$  Hz, C-38), 128.21 (C-36, C-36'), 126.04 (q,  $J = 3.78$  Hz, C-37, C-37'), 123.74 (q,  $J = 277.2$  Hz, C-39), 123.19 (C-12), 122.86 (C-33), 78.84 (C-3), 55.06 (C-5), 53.40 (C-34), 47.47 (C-19), 46.63 (C-9), 46.20 (C-17), 41.97 (C-31), 41.93 (C-14), 39.27 (C-18), 38.73 (C-8), 38.45 (C-4), 36.89 (C-1), 35.02 (C-10), 34.07 (C-21), 32.96 (C-29), 32.43 (C-7), 32.30 (C-22), 30.68 (C-20), 28.07 (C-15), 27.17 (C-23), 27.13 (C-2), 25.70 (C-27), 23.85 (C-16), 23.53 (C-30), 23.43 (C-11), 18.23 (C-6), 16.55 (C-24), 15.57 (C-25), 15.36 (C-26). HRMS (ESI;  $m/z$ ). Calcd for  $\text{C}_{41}\text{H}_{58}\text{N}_4\text{O}_2\text{F}_3$ ,  $[\text{M} + \text{H}]^+$ , 695.4505; found, 695.4495.

4.13. N-[[1-((1H-benzo[d]imidazol-2-yl)methyl)-1H-1,2,3-triazol-4-yl] methyl] oleanolamide (**4m**).

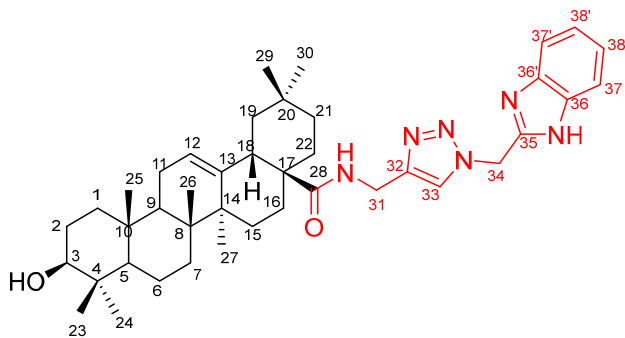

White solid, yield 81%. m.p. 174.0–175.2 °C. IR (KBr):  $\nu = 3394, 2927, 1633, 1521, 1462, 1025, 742$   $\text{cm}^{-1}$ .  $^1\text{H}$

NMR (CDCl<sub>3</sub>)  $\delta$  7.84 (s, 1H, H-33), 7.59 (s, 2H, H-37, H-37'), 7.28 – 7.26 (m, 2H, H-38, H-38'), 6.66 (t,  $J$  = 5.2 Hz, 1H, NH), 5.98 – 5.72 (m, 2H, H-34), 5.32 (d,  $J$  = 21.1 Hz, 1H, H-12), 4.50 (dd,  $J$  = 15.1, 5.3 Hz, 1H, H-31a), 4.34 (dd,  $J$  = 15.1, 5.2 Hz, 1H, H-31b), 3.20 (dd,  $J$  = 11.3, 4.5 Hz, 1H, H-3), 2.52 (d,  $J$  = 9.9 Hz, 1H, H-18), 2.01 – 1.20 (m, 22H, other aliphatic ring protons), 1.11 (s, 3H, CH<sub>3</sub>), 0.96 (s, 3H, CH<sub>3</sub>), 0.88 (s, 3H, CH<sub>3</sub>), 0.85 (s, 3H, CH<sub>3</sub>), 0.74 (s, 3H, CH<sub>3</sub>), 0.73 (s, 3H, CH<sub>3</sub>), 0.45 (s, 3H, CH<sub>3</sub>). <sup>13</sup>C NMR (CDCl<sub>3</sub>)  $\delta$  178.91 (C-28), 144.33 (C-13), 127.41 (C-36, C-36'), 123.55 (C-38, C-38'), 123.35 (C-33), 123.25 (C-12), 100.09 (C-37, C-37'), 78.98 (C-3), 55.01 (C-5), 48.17 (C-34), 47.43 (C-19), 46.59 (C-9), 46.31 (C-17), 42.08 (C-31), 41.96 (C-14), 39.24 (C-18), 38.71 (C-8), 38.39 (C-4), 36.82 (C-1), 35.13 (C-10), 34.04 (C-21), 32.95 (C-29), 32.47 (C-7), 32.25 (C-22), 30.69 (C-20), 28.09 (C-15), 27.19 (C-23), 27.12 (C-2), 25.71 (C-27), 23.91 (C-16), 23.57 (C-30), 23.40 (C-11), 18.13 (C-6), 16.47 (C-24), 15.65 (C-25), 15.24 (C-26). HRMS (ESI;  $m/z$ ). Calcd for C<sub>41</sub>H<sub>59</sub>N<sub>6</sub>O<sub>2</sub>, [M + H]<sup>+</sup>, 667.4694; found, 667.4695.

4.14.

(2R,3R,4S,5R,6R)-2-(acetoxymethyl)-6-(4-((N-(oleanoloyl))aminomethyl)-1H-1,2,3-triazol-1-yl)tetrahydro-2H-pyran-3,4,5-triyl triacetate (**4n**).

White solid, yield 83%. m.p. 131.1–132.7 °C (lit. 129.8–131.7 °C [3]). <sup>1</sup>H NMR spectrum was similar to the reported data [3].

4.15.

N-((1-((2R,3R,4S,5S,6R)-3,4,5-trihydroxy-6-(hydroxymethyl)tetrahydro-2H-pyran-2-yl)-1H-1,2,3-triazol-4-yl)methyl) oleanolamide (**4o**)

White solid, yield 89%. m.p. 188.1–190.4 °C (lit. 190.0–191.8 °C [3]). <sup>1</sup>H NMR spectrum was similar to the reported data [3].

5. The synthesis of methyl oleanolate (**5**)

The intermediate **5** was synthesized according to the reported method [5]. White solid, yield 96%; m.p. 197.0–199.5 °C (lit. 198–200 °C [6]). <sup>1</sup>H NMR data spectrum was similar to the reported data [5].

6. The synthesis of 3-Oxoolean-12-en-28-oic acid methyl ester (**6**)

The intermediate **5** was synthesized according to the reported method [7]. White solid, yield 96%; m.p. 184.7–



186.0 °C (lit. 183–186 °C [8]). <sup>1</sup>H NMR spectrum was similar to the reported data [7].

7. 12 $\alpha$ ,13 $\alpha$ -epoxy-3,4-seco-olean-3,28-dioic acid, 3,4-lactone, 28-methyl ester (7)

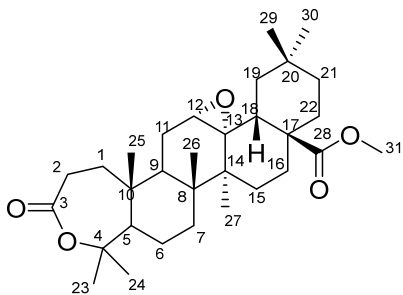

To a solution of **6** (0.10 g, 0.21 mmol) in CH<sub>2</sub>Cl<sub>2</sub> (5 mL), 3-chloroperbenzoic acid (0.09 g, 0.53 mmol) and NaHCO<sub>3</sub> (0.03 g, 0.34 mmol) were added. The reaction mixture was then stirred at room temperature for 12 hours, and then filtered. The filtrate was evaporated under reduced pressure and purified by using silica gel column chromatography with EtOAc/hexanes (1/20) as eluent to afford **7** as white solid in yield 55%. m.p. 178.0–179.2 °C. IR (KBr):  $\nu$  = 3081, 1734, 1716, 1521, 1457, 757 cm<sup>-1</sup>. <sup>1</sup>H NMR (CDCl<sub>3</sub>)  $\delta$  3.69 (s, 3H, H-31), 3.19 (s, 1H, H-12), 2.72 – 2.55 (m, 1H, H-2), 2.54 – 2.38 (m, 1H, H-2'), 2.01 – 1.20 (m, 21H, other aliphatic ring protons), 1.45 (s, 3H, CH<sub>3</sub>), 1.37 (s, 3H, CH<sub>3</sub>), 1.15 (s, 3H, CH<sub>3</sub>), 1.11 (s, 3H, CH<sub>3</sub>), 0.93 (s, 3H, CH<sub>3</sub>), 0.83 (s, 3H, CH<sub>3</sub>), 0.80 (s, 3H, CH<sub>3</sub>). <sup>13</sup>C NMR (126 MHz, CDCl<sub>3</sub>)  $\delta$  178.32 (C-28), 175.23 (C-3), 85.86 (C-4), 67.09 (C-12), 63.55 (C-13), 53.06 (C-3), 51.80 (C-31), 47.82 (C-14), 44.21 (C-9), 40.87 (C-18), 40.41 (C-17), 39.80 (C-7), 39.19 (C-10), 38.86 (C-8), 38.02 (C-19), 34.02 (C-21), 33.19 (C-29), 32.85 (C-2), 32.42 (C-1), 32.38 (C-23), 31.20 (C-6), 30.38 (C-20), 29.15 (C-15), 26.59 (C-24), 24.65 (C-11), 23.34 (C-30), 23.04 (C-22), 22.54 (C-16), 22.41 (C-27), 19.74 (C-25), 19.69 (C-26). ESI-MS (*m/z*) 501.583 [M + H]<sup>+</sup>. HRMS (ESI; *m/z*). Calcd for C<sub>31</sub>H<sub>48</sub>O<sub>5</sub>Na, [M + Na]<sup>+</sup>, 523.3394; found, 523.3417.

8. General Procedure for the preparation of **8a-8h**.

To a cooled solution of AlCl<sub>3</sub> (0.03 g, 0.22 mmol) in anhydrous CH<sub>2</sub>Cl<sub>2</sub> (5 mL), triethylamine (0.03 g, 0.30 mmol) was slowly added. After being stirred for 15 min, the reaction mixture was added with **7** (0.05 g, 0.10 mmol) solution in CH<sub>2</sub>CH<sub>2</sub> and alkyl amine (0.12 mmol). The mixture was stirred for 1 hours and quenched through the addition of ice water (10 mL) and saturated sodium bicarbonate solution (5 mL). The mixture was extracted with CH<sub>2</sub>Cl<sub>2</sub> (3 × 20 mL). The combined organic layer was washed with brine, dried over Na<sub>2</sub>SO<sub>4</sub>, and concentrated.

The residue was purified by using column chromatography on silica gel using  $\text{CH}_2\text{Cl}_2/\text{MeOH}/\text{NH}_3\cdot\text{H}_2\text{O}$  (50:1:0.1–20:1:0.1) as eluent to mainly afford the target compound.

8.1. 13 $\beta$ -4-hydroxy-12-oxo-3,4-seco-olean-3,28-dioic acid, 3-(3-(dimethylamino)propyl)amide,28-methyl ester (**8a**).

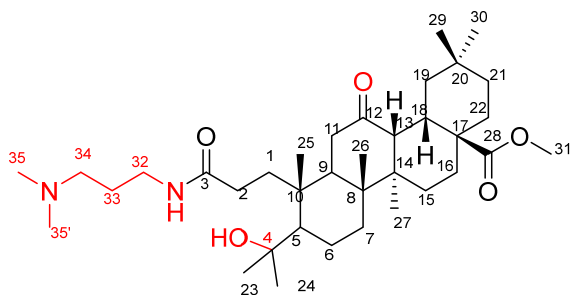

Light yellow solid, yield 55%. m.p. 122.2–123.8 °C. IR (KBr):  $\nu = 3310, 2944, 1722, 1697, 1644, 1099 \text{ cm}^{-1}$ .  $^1\text{H}$  NMR ( $\text{CDCl}_3$ )  $\delta$  7.09 (s, 1H, NH), 3.66 (s, 3H, H-31), 3.33 – 3.07 (m, 2H, H-32), 2.79 (d,  $J = 13.5 \text{ Hz}$ , 1H, H-18), 2.66 – 2.60 (m, 1H, H-13), 2.60 – 2.49 (m, 1H, H-1a), 2.33 (d,  $J = 5.6 \text{ Hz}$ , 2H, H-34), 2.21 (s, 6H, H-35, H-35'), 2.15 – 1.20 (m, 23H, protons of other aliphatic ring and chain), 1.29 (s, 3H,  $\text{CH}_3$ ), 1.21 (s, 3H,  $\text{CH}_3$ ), 0.99 (s, 3H,  $\text{CH}_3$ ), 0.96 (s, 6H,  $2 \times \text{CH}_3$ ), 0.92 (s, 3H,  $\text{CH}_3$ ), 0.89 (s, 3H,  $\text{CH}_3$ ).  $^{13}\text{C}$  NMR ( $\text{CDCl}_3$ )  $\delta$  211.78 (C-12), 178.39 (C-28), 174.56 (C-3), 75.48 (C-4), 58.18 (C-34), 51.86 (C-13), 51.77 (C-5), 50.72 (C-31), 47.32 (C-9), 45.37 (C-35, C-35'), 42.20 (C-17), 41.50 (C-14), 41.34 (C-8), 40.96 (C-32), 39.00 (C-10), 38.10 (C-19), 36.27 (C-11), 34.46 (C-1), 34.38 (C-18), 34.24 (C-7), 33.40 (C-21), 32.91 (C-2), 31.95 (C-29), 30.97 (C-30), 30.87 (C-16), 30.64 (C-22), 27.62 (C-20), 26.64 (C-33), 26.16 (C-15), 23.17 (C-24), 22.86 (C-23), 22.79 (C-6), 20.20 (C-27), 19.46 (C-26), 15.67 (C-25). HRMS (ESI;  $m/z$ ). Calcd for  $\text{C}_{36}\text{H}_{63}\text{N}_2\text{O}_5$ ,  $[\text{M} + \text{H}]^+$ , 603.4731; found, 603.4732.

8.2. 13 $\beta$ -4-hydroxy-12-oxo-3,4-seco-olean-3,28-dioic acid, 3-(3-morpholinopropyl)amide,28-methyl ester (**8b**).

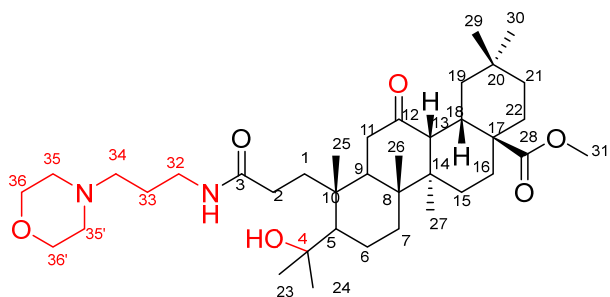

Light yellow solid, yield 40%. m.p. 108.9–110.1 °C. IR (KBr):  $\nu = 3336, 2943, 1722, 1693, 1643, 1238, 1192$ ,

1163, 691  $\text{cm}^{-1}$ .  $^1\text{H}$  NMR ( $\text{CDCl}_3$ )  $\delta$  6.66 (s, 1H, NH), 3.71 (s, 4H, H-36, H-36'), 3.68 (s, 3H, H-31), 3.29 (d,  $J = 5.2$  Hz, 2H, H-32), 2.80 (d,  $J = 12.8$  Hz, 1H, H-18), 2.65 (s, 1H, H-13), 2.62 – 2.54 (m, 1H, H-1a), 2.50 – 2.36 (m, 6H, H-34, H-35, H-35'), 2.01 – 1.20 (m, 25H, protons of other aliphatic ring and chain), 1.31 (s, 3H,  $\text{CH}_3$ ), 1.23 (s, 3H,  $\text{CH}_3$ ), 1.01 (s, 3H,  $\text{CH}_3$ ), 0.98 (s, 6H,  $2 \times \text{CH}_3$ ), 0.94 (s, 3H,  $\text{CH}_3$ ), 0.91 (s, 3H,  $\text{CH}_3$ ).  $^{13}\text{C}$  NMR ( $\text{CDCl}_3$ )  $\delta$  211.66 (C-12), 178.36 (C-28), 174.33 (C-3), 75.63 (C-4), 66.95 (C-36, C-36'), 57.13 (C-34), 53.70 (C-35, C-35'), 51.85 (C-13), 51.76 (C-5), 50.83 (C-31), 47.31 (C-9), 42.26 (C-17), 41.63 (C-14), 41.33 (C-8), 40.99 (C-32), 38.69 (C-10), 38.18 (C-19), 36.28 (C-11), 34.45 (C-1), 34.38 (C-18), 34.16 (C-7), 33.39 (C-21), 32.90 (C-2), 31.96 (C-29), 30.98 (C-30), 30.91 (C-16), 30.64 (C-22), 27.63 (C-20), 26.75 (C-33), 25.42 (C-15), 23.17 (C-24), 22.83 (C-23), 22.79 (C-6), 20.18 (C-27), 19.48 (C-26), 15.68 (C-25). HRMS (ESI;  $m/z$ ). Calcd for  $\text{C}_{38}\text{H}_{65}\text{N}_2\text{O}_6$ ,  $[\text{M} + \text{H}]^+$ , 645.4837; found, 645.4844.

8.3. 13 $\beta$ -4-hydroxy-12-oxo-3,4-seco-olean-3,28-dioic acid, 3-(3-(1H-imidazol-1-yl)propyl)amide,28-methyl ester (**8c**).

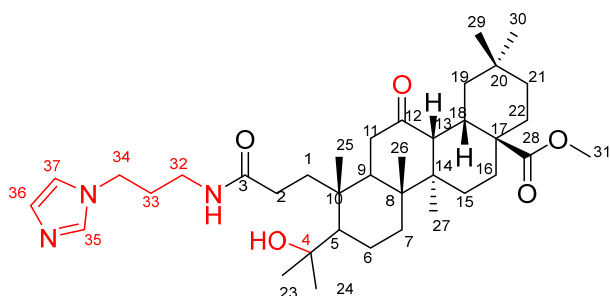

Light yellow solid, yield 47%. m.p. 120.1–121.7  $^{\circ}\text{C}$ . IR (KBr):  $\nu = 3362, 2944, 1722, 1693, 1646, 1238, 1192, 1163, 692$   $\text{cm}^{-1}$ .  $^1\text{H}$  NMR ( $\text{CDCl}_3$ )  $\delta$  7.47 (s, 1H, H-35), 7.04 (s, 1H, H-37), 6.94 (s, 1H, H-36), 6.53 (d,  $J = 5.5$  Hz, 1H, NH), 3.97 (t,  $J = 6.8$  Hz, 2H, H-34), 3.69 (s, 3H, H-31), 3.19 (dd,  $J = 12.5, 6.3$  Hz, 2H, H-32), 2.80 (d,  $J = 13.3$  Hz, 1H, H-18), 2.66 (d,  $J = 4.0$  Hz, 1H, H-13), 2.56 – 2.40 (m, 1H, H-1a), 2.01 – 1.20 (m, 25H, protons of other aliphatic ring and chain), 1.33 (s, 3H,  $\text{CH}_3$ ), 1.26 (s, 3H,  $\text{CH}_3$ ), 1.01 (s, 3H,  $\text{CH}_3$ ), 0.98 (s, 6H,  $2 \times \text{CH}_3$ ), 0.93 (s, 3H,  $\text{CH}_3$ ), 0.91 (s, 3H,  $\text{CH}_3$ ).  $^{13}\text{C}$  NMR ( $\text{CDCl}_3$ )  $\delta$  211.82 (C-12), 178.33 (C-28), 175.04 (C-3), 129.30 (C-36), 75.82 (C-4), 51.82 (C-34), 51.75 (C-13), 51.08 (C-5), 47.31 (C-9), 44.73, 42.25 (C-17), 41.75 (C-14), 41.32 (C-8), 41.00 (C-32), 38.06 (C-10), 36.68 (C-19), 36.30 (C-11), 34.83 (C-1), 34.50 (C-18), 34.44 (C-7), 33.40 (C-21), 32.90 (C-2), 31.98 (C-29), 31.01 (C-33), 30.97 (C-30), 30.93 (C-16), 30.62 (C-22), 27.64 (C-20), 26.77 (C-15),

23.18 (C-24), 22.79 (C-23), 22.70 (C-6), 20.19 (C-27), 19.59 (C-26), 15.75 (C-25). ESI-MS ( $m/z$ ) 626  $[M + H]^+$ . HRMS (ESI;  $m/z$ ). Calcd for  $C_{37}H_{59}N_3O_5Na$ ,  $[M + Na]^+$ , 648.4347; found, 648.4337.

8.4. 13 $\beta$ -4-hydroxy-12-oxo-3,4-seco-olean-3,28-dioic acid, 3-(2-(thiophen-2-yl)ethyl)amide,28-methyl ester (**8d**).

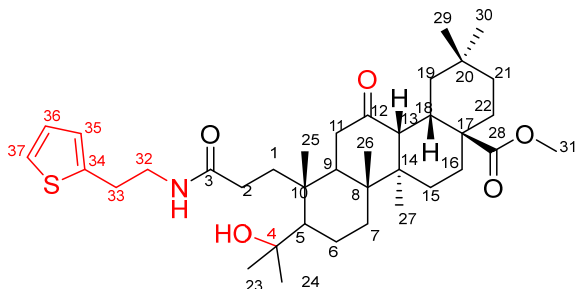

Light yellow solid, yield 55%. m.p. 120.0–121.5 °C. IR (KBr):  $\nu = 3420, 2939, 1636, 1522, 1116, 997 \text{ cm}^{-1}$ .  $^1\text{H}$  NMR ( $\text{CDCl}_3$ )  $\delta$  7.20 – 7.15 (m, 1H, H-37), 6.95 (dd,  $J = 5.0, 3.5 \text{ Hz}$ , 1H, H-36), 6.83 (d,  $J = 2.8 \text{ Hz}$ , 1H, H-35), 6.20 (t,  $J = 5.5 \text{ Hz}$ , 1H, NH), 3.67 (s, 3H, H-31), 3.62 – 3.42 (m, 2H, H-32), 3.01 (t,  $J = 6.2 \text{ Hz}$ , 2H, H-33), 2.80 (d,  $J = 13.5 \text{ Hz}$ , 1H, H-18), 2.63 (d,  $J = 4.1 \text{ Hz}$ , 1H, H-13), 2.53 – 2.40 (m, 1H, H-1a), 2.30 – 1.20 (m, 23H, protons of other aliphatic ring and chain), 1.26 (s, 3H,  $\text{CH}_3$ ), 1.19 (s, 3H,  $\text{CH}_3$ ), 0.98 (s, 3H,  $\text{CH}_3$ ), 0.97 (s, 3H,  $\text{CH}_3$ ), 0.96 (s, 3H,  $\text{CH}_3$ ), 0.90 (s, 6H,  $2 \times \text{CH}_3$ ).  $^{13}\text{C}$  NMR ( $\text{CDCl}_3$ )  $\delta$  211.63 (C-12), 178.33 (C-28), 174.65 (C-3), 141.66 (C-34), 127.01 (C-35), 125.41 (C-36), 123.93 (C-37), 75.73 (C-4), 51.83 (C-13), 51.73 (C-5), 50.66 (C-31), 47.29 (C-9), 42.15 (C-17), 41.57 (C-14), 41.30 (C-32), 40.94 (C-8), 40.67 (C-10), 38.01 (C-19), 36.25 (C-11), 34.54 (C-1), 34.44 (C-18, C-7), 33.41 (C-21), 32.90 (C-2), 31.94 (C-33), 30.95 (C-29), 30.90 (C-30), 30.63 (C-16), 29.81 (C-22), 27.61 (C-20), 26.72 (C-15), 23.17 (C-24), 22.78 (C-23), 22.75 (C-6), 20.21 (C-27), 19.49 (C-26), 15.69 (C-25). ESI-MS ( $m/z$ ) 628  $[M + H]^+$  HRMS (ESI;  $m/z$ ). Calcd for  $C_{37}H_{57}NO_5SNa$ ,  $[M + Na]^+$ , 650.3850; found, 650.3869.

8.5. 13 $\beta$ -4-hydroxy-12-oxo-3,4-seco-olean-3,28-dioic acid, 3-(4-fluorophenyl)amide,28-methyl ester (**8e**).

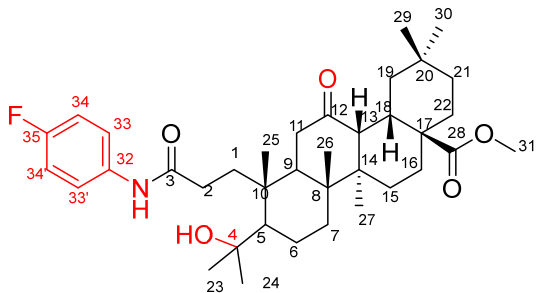

Light yellow solid, yield 56%. m.p. 146.6–148.1 °C. IR (KBr):  $\nu = 3335, 2944, 1724, 1508, 1191, 1161, 832, 516$   $\text{cm}^{-1}$ .  $^1\text{H}$  NMR ( $\text{CDCl}_3$ )  $\delta$  8.49 (s, 1H, NH), 7.46 (dd,  $J = 8.3, 4.8$  Hz, 2H, H-33, H-33'), 6.95 (t,  $J = 8.5$  Hz, 2H, H-34, H-34'), 3.68 (s, 3H, H-31), 3.23 (br s, 1H, OH), 2.80 (d,  $J = 12.8$  Hz, 1H, H-18), 2.66 (s, 1H, H-13), 2.60 – 2.44 (m, 2H, H-1), 2.50 – 1.20 (m, 20H, protons of other aliphatic ring and chain), 1.35 (s, 3H,  $\text{CH}_3$ ), 1.27 (s, 3H,  $\text{CH}_3$ ), 1.00 (s, 3H,  $\text{CH}_3$ ), 0.96 (s, 6H,  $2 \times \text{CH}_3$ ), 0.93 (s, 3H,  $\text{CH}_3$ ), 0.91 (s, 3H,  $\text{CH}_3$ ).  $^{13}\text{C}$  NMR ( $\text{CDCl}_3$ )  $\delta$  212.22 (C-12), 178.34 (C-28), 173.08 (C-3), 159.06 (d,  $J = 242.7$  Hz, C-35), 134.41 (d,  $J = 2.5$  Hz, C-32), 121.41 (d,  $J = 7.8$  Hz, C-33, C-33'), 115.40 (d,  $J = 22.4$  Hz, C-34, C-34'), 76.30 (C-4), 51.87 (C-13), 51.81 (C-5), 50.96 (C-31), 47.28 (C-9), 42.16 (C-17), 41.77 (C-14), 41.36 (C-8), 40.96 (C-10), 38.02 (C-19), 36.28 (C-11), 34.79 (C-1), 34.67 (C-18), 34.41 (C-7), 33.46 (C-21), 32.88 (C-2), 32.00 (C-29), 31.98 (C-30), 30.97 (C-16), 30.64 (C-22), 27.60 (C-20), 26.79 (C-15), 23.19 (C-24), 22.75 (C-23), 22.69 (C-6), 20.26 (C-27), 19.56 (C-26), 15.76 (C-25). HRMS (ESI;  $m/z$ ). Calcd for  $\text{C}_{37}\text{H}_{53}\text{NO}_5\text{F}$ ,  $[\text{M} - \text{H}]^-$ , 610.3913; found, 610.3933.

8.6. 13 $\beta$ -4-hydroxy-12-oxo-3,4-seco-olean-3,28-dioic acid, 3-(4-methoxyphenyl)amide,28-methyl ester (**8f**).

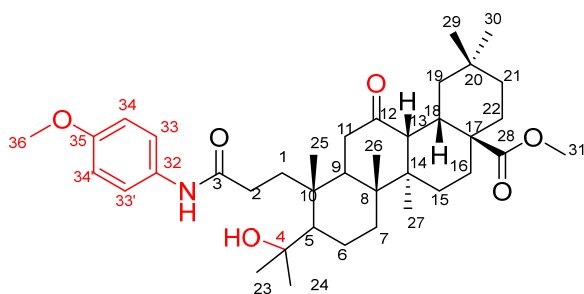

Light yellow solid, yield 61%. m.p. 138.8–140.3 °C. IR (KBr):  $\nu = 3318, 2945, 1724, 1677, 1509, 1239, 1194, 1162$   $\text{cm}^{-1}$ .  $^1\text{H}$  NMR ( $\text{CDCl}_3$ )  $\delta$  7.99 (s, 1H, NH), 7.39 (d,  $J = 6.5$  Hz, 2H, H-33, H-33'), 6.82 (d,  $J = 6.5$  Hz, 2H, H-34, H-34'), 3.77 (s, 3H, H-36), 3.68 (s, 3H, H-31), 2.92 (s, 1H, OH), 2.81 (d,  $J = 12.6$  Hz, 1H, H-18), 2.66 (s, 1H, H-13), 2.51 (dd,  $J = 61.8, 11.4$  Hz, 2H, H-1), 2.32 – 1.20 (m, 20H, protons of other aliphatic ring and chain), 1.34 (s, 3H,  $\text{CH}_3$ ), 1.27 (s, 3H,  $\text{CH}_3$ ), 1.01 (s, 3H,  $\text{CH}_3$ ), 0.98 (s, 6H,  $2 \times \text{CH}_3$ ), 0.95 (s, 3H,  $\text{CH}_3$ ), 0.92 (s, 3H,  $\text{CH}_3$ ).  $^{13}\text{C}$  NMR ( $\text{CDCl}_3$ )  $\delta$  211.96 (C-12), 178.38 (C-28), 172.69 (C-3), 156.17 (C-35), 131.40 (C-32), 121.50 (C-33, C-33'), 114.07 (C-34, C-34'), 76.22 (C-4), 55.48 (C-36), 51.87 (C-13), 51.81 (C-5), 50.90 (C-31), 47.32 (C-9), 42.22 (C-17), 41.78 (C-14), 41.39 (C-8), 41.00 (C-10), 38.09 (C-19), 36.28 (C-11), 34.70 (C-1), 34.67 (C-18), 34.46 (C-7), 33.44 (C-21), 32.91 (C-2), 32.02 (C-29), 31.98 (C-30), 30.99 (C-16), 30.65 (C-22), 27.63

(C-20), 26.85 (C-15), 23.19 (C-24), 22.86 (C-23), 22.78 (C-6), 20.26 (C-27), 19.56 (C-26), 15.76 (C-25). HRMS (ESI;  $m/z$ ). Calcd for  $C_{38}H_{56}NO_6$ ,  $[M - H]^-$ , 622.4113; found, 622.4084.

8.7. 13 $\beta$ -4-hydroxy-12-oxo-3,4-seco-olean-3,28-dioic acid, 3-(4-(trifluoromethoxy)phenyl)amide, 28-methyl ester (**8g**).

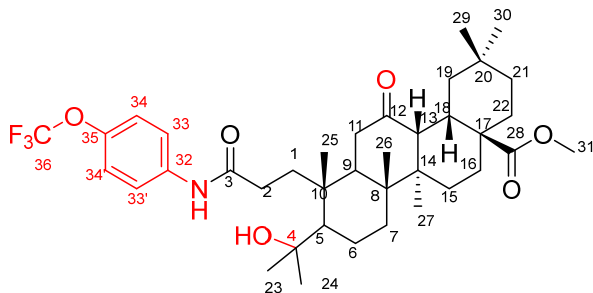

Light yellow solid, yield 65%. m.p. 135.6–137.1 °C. IR (KBr):  $\nu = 3325, 2945, 1724, 1677, 1508, 1239, 1195, 1162 \text{ cm}^{-1}$ .  $^1\text{H NMR}$  ( $\text{CDCl}_3$ )  $\delta$  8.55 (d,  $J = 6.6 \text{ Hz}$ , 1H, NH), 7.53 (d,  $J = 8.8 \text{ Hz}$ , 2H, H-33, H-33'), 7.11 (d,  $J = 8.5 \text{ Hz}$ , 2H, H-34, H-34'), 3.68 (s, 3H, H-31), 2.98 (s, 1H, OH), 2.81 (d,  $J = 13.4 \text{ Hz}$ , 1H, H-18), 2.66 (d,  $J = 3.9 \text{ Hz}$ , 1H, H-13), 2.59 – 2.43 (m, 2H, H-1), 2.31 – 1.41 (m, 19H, protons of other aliphatic ring and chain), 1.36 (s, 3H,  $\text{CH}_3$ ), 1.28 (s, 3H,  $\text{CH}_3$ ), 1.00 (s, 3H,  $\text{CH}_3$ ), 0.96 (s, 6H,  $2 \times \text{CH}_3$ ), 0.92 (s, 3H,  $\text{CH}_3$ ), 0.91 (s, 3H,  $\text{CH}_3$ ).  $^{13}\text{C NMR}$  ( $\text{CDCl}_3$ )  $\delta$  212.14 (C-12), 178.36 (C-28), 173.20 (C-3), 144.88 (C-35), 137.12 (C-32), 121.61 (C-33, C-33'), 120.69 (C-34, C-34'), 119.48 (q,  $J = 5.04 \text{ Hz}$ , C-36), 76.50 (C-4), 51.87 (C-13), 51.83 (C-5), 50.98 (C-31), 47.29 (C-9), 42.14 (C-17), 41.80 (C-14), 41.38 (C-8), 40.97 (C-10), 38.00 (C-19), 36.28 (C-11), 34.87 (C-1), 34.78 (C-18), 34.41 (C-7), 33.44 (C-21), 32.88 (C-2), 32.16 (C-29), 31.98 (C-30), 31.00 (C-16), 30.64 (C-22), 27.61 (C-20), 26.84 (C-15), 23.18 (C-24), 22.75 (C-23), 22.67 (C-6), 20.25 (C-27), 19.58 (C-26), 15.77 (C-25). HRMS (ESI;  $m/z$ ). Calcd for  $C_{38}H_{53}NO_6F_3$ ,  $[M - H]^-$ , 676.3830; found, 676.3843.

8.8. 13 $\beta$ -3-(4-(2,4-difluorophenyl)piperazin-1-yl)-4-hydroxy-12-oxo-3,4-seco-olean-3-one-28-oic acid methyl ester (**8h**).

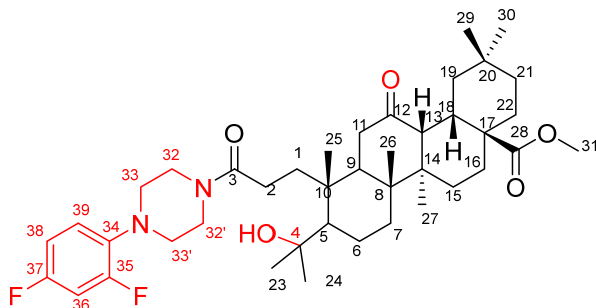

Light yellow solid, yield 66%. m.p. 117.5–118.9 °C. IR (KBr):  $\nu = 3324, 2944, 1724, 1677, 1508, 1456, 1194, 1163, 700 \text{ cm}^{-1}$ .  $^1\text{H NMR}$  ( $\text{CDCl}_3$ )  $\delta$  6.96 – 6.68 (m, 3H, H-36, H-38, H-39), 3.88 – 3.78 (m, 2H, H-32), 3.69 (s, 3H, H-31), 3.65 – 3.57 (m, 2H, H-32'), 3.48 (s, 1H, OH), 3.11 – 2.90 (m, 4H, H-33, H-33'), 2.98 (s, 1H, H-18), 2.81 (d,  $J = 13.5 \text{ Hz}$ , 1H, H-13), 2.65 (s, 1H, H-1a), 2.49 – 1.41 (m, 26H, protons of other aliphatic ring and chain), 1.32 (s, 3H,  $\text{CH}_3$ ), 1.22 (s, 3H,  $\text{CH}_3$ ), 1.03 (s, 3H,  $\text{CH}_3$ ), 0.99 (s, 3H,  $\text{CH}_3$ ), 0.98 (s, 3H,  $\text{CH}_3$ ), 0.95 (s, 3H,  $\text{CH}_3$ ), 0.90 (s, 3H,  $\text{CH}_3$ ).  $^{13}\text{C NMR}$  ( $\text{CDCl}_3$ )  $\delta$  211.66 (C-12), 178.33 (C-28), 173.25 (C-3), 158.29 (dd,  $J = 243.9, 11.5 \text{ Hz}$ , C-35), 155.76 (dd,  $J = 249.6, 11.6 \text{ Hz}$ , C-37), 136.09 (dd,  $J = 8.9, 3.3 \text{ Hz}$ , C-39), 119.94 (dd,  $J = 9.2, 3.7 \text{ Hz}$ , C-34), 110.85 (dd,  $J = 21.4, 3.4 \text{ Hz}$ , C-38), 104.85 (t,  $J = 25.4 \text{ Hz}$ , C-36), 75.37 (C-4), 51.85 (C-13), 51.75 (C-5), 51.52 (C-33), 50.81 (C-31), 50.68 (C-33'), 47.30 (C-9), 46.25 (C-32), 42.26 (C-17), 41.87 (C-32'), 41.59 (C-14), 41.48 (C-8), 41.02 (C-10), 38.43 (C-19), 36.33 (C-11), 34.43 (C-1), 34.32 (C-18), 33.71 (C-7), 33.39 (C-21), 32.89 (C-2), 31.97 (C-29), 30.83 (C-30), 30.65 (C-16), 27.64 (C-22), 26.91 (C-20), 26.42 (C-15), 23.18 (C-24), 22.99 (C-23), 22.78 (C-6), 20.17 (C-27), 19.36 (C-26), 15.63 (C-25). HRMS (ESI;  $m/z$ ). Calcd for  $\text{C}_{41}\text{H}_{60}\text{N}_2\text{O}_5\text{F}_6\text{Na}$ ,  $[\text{M} + \text{Na}]^+$ , 721.4363; found, 721.4346.

9. Methyl 2-Carboxy-3-oxooleana-1,12-dien-28-oate (**9**).

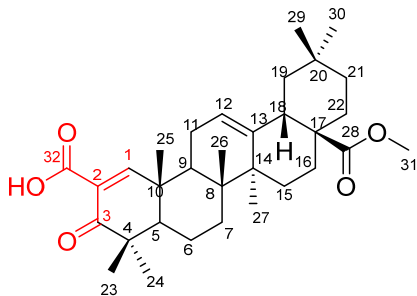

The intermediate **9** was synthesized according to the reported method [9]. White solid, yield 69%. m.p. 225.8–226.1 °C (lit: 230–231 °C [9]).  $^1\text{H NMR}$  were consistent with reported data [9].

## 10. General Procedure for the preparation of **10a–10d**.

To a solution of **9** (0.30 g, 0.59 mmol) in DMF (5 mL), 2-(7-azabenzotriazol-1-yl)-N,N,N',N'-tetramethyluronium hexafluorophosphate (0.34 g, 0.88 mmol), N,N-diisopropylethylamine (0.23 g, 1.76 mmol) and corresponding alkyl amine (0.70 mmol) were added. The mixture was stirred for 0.5 hour at room temperature. The reaction mixture was added with water (15 mL) and was extracted with ethyl acetate (15 mL). The combined organic layer was washed with brine for three times, dried over anhydrous sodium sulfate, filtered, and concentrated. The residue was purified by using column chromatography on silica gel to give the target compound.

### 10.1. Methyl 2-(2-(diethylamino)ethyl)carbamoyl-3-oxooleana-1,12-dien-28-oate (**10a**).

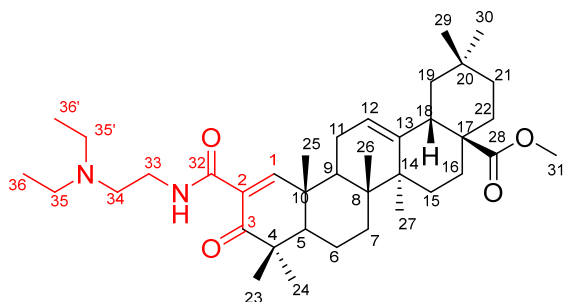

Light yellow solid, yield 90%. m.p. 134.1–136.5 °C. IR (KBr):  $\nu = 3323, 2944, 1724, 1674, 1524, 1461, 841, 730, 557 \text{ cm}^{-1}$ .  $^1\text{H NMR}$  ( $\text{CDCl}_3$ )  $\delta$  9.04 (s, 1H, NH), 8.22 (s, 1H, H-1), 5.37 (t,  $J = 3.2 \text{ Hz}$ , 1H, H-12), 3.63 (s, 3H, H-31), 3.52 (d,  $J = 5.6 \text{ Hz}$ , 2H, H-33), 3.00 – 2.73 (m, 7H, H-18, H-34, H-35, H-35'), 2.49 – 1.41 (m, 23H, protons of other aliphatic ring and chain), 1.18 (s, 3H,  $\text{CH}_3$ ), 1.18 – 1.15 (m, 9H,  $3 \times \text{CH}_3$ ), 1.14 (s, 6H,  $2 \times \text{CH}_3$ ), 0.94 (s, 3H,  $\text{CH}_3$ ), 0.91 (s, 3H,  $\text{CH}_3$ ), 0.84 (s, 3H,  $\text{CH}_3$ ).  $^{13}\text{C NMR}$  ( $\text{CDCl}_3$ )  $\delta$  205.73 (C-3), 178.24 (C-28), 168.23 (C-32), 165.38 (C-1), 144.20 (C-13), 126.53 (C-2), 121.60 (C-12), 52.69 (C-34), 52.00 (C-5), 51.61 (C-31), 47.57 (C-35, C-35'), 46.83 (C-17), 45.82 (C-19), 45.59 (C-4), 42.13 (C-14), 41.57 (C-18), 41.10 (C-9), 40.25 (C-1), 39.39 (C-8), 37.33 (C-33), 33.88 (C-21), 33.12 (C-7), 32.28 (C-22), 32.14 (C-20), 30.72 (C-24), 28.85 (C-15), 27.64 (C-29), 25.79 (C-27), 23.58 (C-30), 23.38 (C-11), 23.01 (C-16), 21.74 (C-23), 19.17 (C-6), 18.39 (C-26), 17.43 (C-25), 10.94 (C-36, C-36'). HRMS (ESI;  $m/z$ ). Calcd for  $\text{C}_{38}\text{H}_{61}\text{N}_2\text{O}_4$ ,  $[\text{M} + \text{H}]^+$ , 609.4626; found, 609.4624.

### 10.2 Ethyl 2-(3-(pyrrolidin-1-yl)propyl)carbamoyl-3-oxooleana-1,12-dien-28-oate (**10b**)



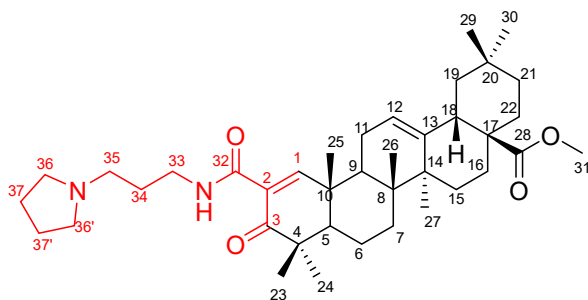

Light yellow solid, yield 89%. m.p. 134.0–136.0 °C. IR (KBr):  $\nu = 2946, 1721, 1669, 1536, 834, 729, 556 \text{ cm}^{-1}$ .  $^1\text{H NMR}$  ( $\text{CDCl}_3$ )  $\delta$  9.14 (t,  $J = 6.3 \text{ Hz}$ , 1H, NH), 8.15 (s, 1H, H-1), 5.36 (s, 1H, H-12), 3.61 (s, 3H, H-31), 3.48 – 3.40 (m, 2H, H-33), 3.40 – 3.20 (m, 3H, H-36, H-18), 3.18 (t,  $J = 6.4 \text{ Hz}$ , 2H, H-36'), 2.78 (s, 2H, H-35), 2.42 – 1.20 (m, 24H, protons of other aliphatic ring and chain), 1.18 (s, 3H,  $\text{CH}_3$ ), 1.18 (s, 3H,  $\text{CH}_3$ ), 1.16 (s, 6H,  $2 \times \text{CH}_3$ ), 0.94 (s, 3H,  $\text{CH}_3$ ), 0.91 (s, 3H,  $\text{CH}_3$ ), 0.84 (s, 3H,  $\text{CH}_3$ ).  $^{13}\text{C NMR}$  ( $\text{CDCl}_3$ )  $\delta$  205.84 (C-3), 178.23 (C-28), 168.93 (C-32), 166.93 (C-1), 144.35 (C-13), 125.72 (C-2), 121.47 (C-12), 53.93 (C-36, C-36'), 51.84 (C-34), 51.78 (C-5), 51.63 (C-31), 46.80 (C-17), 45.81 (C-19), 45.65 (C-4), 42.14 (C-33), 41.53 (C-14), 41.04 (C-18), 40.31 (C-35), 41.10 (C-9), 39.58 (C-1), 38.61 (C-8), 35.68 (C-33), 33.82 (C-21), 33.10 (C-7), 32.25 (C-22), 32.08 (C-20), 30.70 (C-24), 28.64 (C-15), 27.62 (C-34), 26.31 (C-29), 25.80 (C-27), 23.60 (C-37, C-37'), 23.37 (C-30), 23.09 (C-11), 22.98 (C-16), 21.82 (C-23), 19.06 (C-6), 18.27 (C-26), 17.42 (C-25). HRMS (ESI;  $m/z$ ). Calcd for  $\text{C}_{39}\text{H}_{61}\text{N}_2\text{O}_4$ ,  $[\text{M} + \text{H}]^+$ , 621.4626; found, 621.4612.

### 10.3. Methyl 2-(3-phenylpropyl)carbamoyl-3-oxooleana-1,12-dien-28-oate (**10c**)

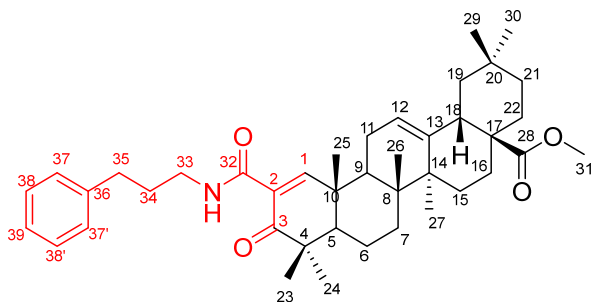

White solid, yield 87%. m.p. 135.3–137.0 °C. IR (KBr):  $\nu = 2944, 1725, 1676, 1524, 1163, 699 \text{ cm}^{-1}$ .  $^1\text{H NMR}$  ( $\text{CDCl}_3$ )  $\delta$  8.73 (s, 1H, NH), 8.24 (s, 1H, H-1), 7.27 (t,  $J = 7.1 \text{ Hz}$ , 2H, H-37, H-37'), 7.18 (dd,  $J = 12.8, 7.3 \text{ Hz}$ , 3H, H-38, H-38', H-39), 5.37 (s, 1H, H-12), 3.63 (s, 3H, H-31), 3.49 – 3.29 (m, 2H, H-33, H-33'), 2.89 (d,  $J = 12.2 \text{ Hz}$ , 1H, H-18), 2.68 (t,  $J = 7.4 \text{ Hz}$ , 2H, H-35), 2.42 – 1.20 (m, 20H, protons of other aliphatic ring and chain),

1.16 (s, 3H, CH<sub>3</sub>), 1.15 (s, 3H, CH<sub>3</sub>), 1.14 (s, 6H, 2 × CH<sub>3</sub>), 0.94 (s, 3H, CH<sub>3</sub>), 0.92 (s, 3H, CH<sub>3</sub>), 0.83 (s, 3H, CH<sub>3</sub>). <sup>13</sup>C NMR (CDCl<sub>3</sub>) δ 206.32 (C-3), 178.23 (C-28), 167.91 (C-32), 163.85 (C-1), 144.08 (C-13), 141.49 (C-36), 128.40 (C-37, C-37', C-38, C-38'), 126.96 (C-39), 125.89 (C-2), 121.72 (C-12), 51.99 (C-5), 51.59 (C-31), 46.83 (C-17), 45.86 (C-19), 45.54 (C-4), 42.11 (C-14), 41.56 (C-18), 41.10 (C-9), 40.22 (C-1), 39.28 (C-8), 39.00 (C-33), 33.90 (C-21), 33.26 (C-35), 33.13 (C-7), 32.30 (C-22), 32.15 (C-20), 30.94 (C-34), 30.72 (C-24), 28.97 (C-15), 27.65 (C-29), 25.80 (C-27), 23.57 (C-30), 23.37 (C-11), 23.02 (C-16), 21.77 (C-23), 19.22 (C-6), 18.53 (C-26), 17.42 (C-25). HRMS (ESI; *m/z*). Calcd for C<sub>41</sub>H<sub>57</sub>NO<sub>4</sub>Na, [M + Na]<sup>+</sup>, 650.4180; found, 650.4163.

#### 10.4. Methyl 2-(4-(trifluoromethyl)phenethyl)carbamoyl-3-oxooleana-1,12-dien-28-oate (**10d**).

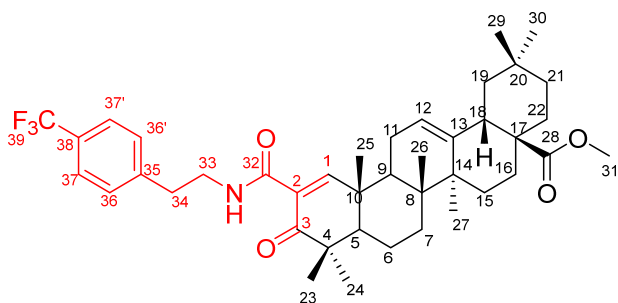

Light yellow solid, yield 95%. m.p. 138.6–140.1 °C. IR (KBr):  $\nu = 2947, 1723, 1674, 1528, 1323, 1162, 1122, 1067, 730 \text{ cm}^{-1}$ . <sup>1</sup>H NMR (CDCl<sub>3</sub>) δ 8.76 (t, *J* = 5.6 Hz, 1H, NH), 8.23 (s, 1H, H-1), 7.55 (d, *J* = 8.1 Hz, 2H, H-37, H-37'), 7.33 (d, *J* = 8.0 Hz, 2H, H-36, H-36'), 5.37 (t, *J* = 3.2 Hz, 1H, H-12), 3.62 (d, *J* = 5.8 Hz, 3H, H-31), 3.61 – 3.55 (m, 2H, H-33), 2.99 – 2.84 (m, 3H, H-18, H-34), 2.38 – 1.34 (m, 19H, protons of other aliphatic ring and chain), 1.15 (s, 3H, CH<sub>3</sub>), 1.14 (s, 3H, CH<sub>3</sub>), 1.13 (s, 3H, CH<sub>3</sub>), 1.12 (s, 3H, CH<sub>3</sub>), 0.94 (s, 3H, CH<sub>3</sub>), 0.92 (s, 3H, CH<sub>3</sub>), 0.83 (s, 3H, CH<sub>3</sub>). <sup>13</sup>C NMR (CDCl<sub>3</sub>) δ 206.26 (C-3), 178.25 (C-28), 168.16 (C-32), 163.97 (C-1), 144.14 (C-13), 143.24 (C-35), 129.10 (C-36, C-36'), 128.91 (C-38), 128.59 (C-39), 126.81 (C-2), 125.47 (C-37), 125.43 (C-37'), 121.66 (C-12), 51.97 (C-5), 51.60 (C-31), 46.84 (C-17), 45.85 (C-19), 45.55 (C-4), 42.11 (C-14), 41.56 (C-18), 41.08 (C-9), 40.61 (C-1), 40.23 (C-33), 39.32 (C-8), 35.52 (C-34), 33.90 (C-21), 33.13 (C-7), 32.29 (C-22), 32.13 (C-20), 30.73 (C-24), 28.94 (C-15), 27.65 (C-29), 25.79 (C-27), 23.57 (C-30), 23.36 (C-11), 23.01 (C-16), 21.72 (C-23), 19.21 (C-6), 18.52 (C-26), 17.42 (C-25). HRMS (ESI; *m/z*). Calcd for C<sub>41</sub>H<sub>55</sub>F<sub>3</sub>NO<sub>4</sub>, [M + H]<sup>+</sup>, 682.4078; found, 682.4069.

## References

1. Jana, J.; Mondal, S.; Bhattacharjee, P.; Sengupta, P.; Roychowdhury, T.; Saha, P.; Kundu, P.; Chatterjee, S., Chelerythrine down regulates expression of VEGFA, BCL2 and KRAS by arresting G-Quadruplex structures at their promoter regions. *Sci. Rep.* **2017**, *7*, 14.
2. Xiao, S.; Wang, Q.; Si, L.; Shi, Y.; Wang, H.; Yu, F.; Zhang, Y.; Li, Y.; Zheng, Y.; Zhang, C.; Wang, C.; Zhang, L.; Zhou, D., Synthesis and anti-HCV entry activity studies of  $\beta$ -cyclodextrin-pentacyclic triterpene conjugates. *ChemMedChem* **2014**, *9*, (5), 1060–1070.
3. Su, Y. Q.; Meng, L. K.; Sun, J. Q.; Li, W. J.; Shao, L.; Chen, K. X.; Zhou, D. M.; Yang, F.; Yu, F., Design, synthesis of oleanolic acid-saccharide conjugates using click chemistry methodology and study of their anti-influenza activity. *Eur. J. Med. Chem.* **2019**, *182*, 111–622.
4. Li, W.; Yang, F.; Meng, L.; Sun, J.; Su, Y.; Shao, L.; Zhou, D.; Yu, F., Synthesis, structure activity relationship and anti-influenza A virus evaluation of oleanolic acid-linear amino derivatives. *Chem. Pharm. Bull.* **2019**, *67*, (11), 1201–1207.
5. Fu, L.; Gribble, G. W., Efficient and Scalable Synthesis of Bardoxolone Methyl (CDDO-methyl Ester). *Org. Lett.* **2013**, *15*, (7), 1622–1625.
6. Loesche, A.; Köwitsch, A.; Lucas, S. D.; Al-Halabi, Z.; Sippl, W.; Al-Harrasi, A.; Csuk, R., Ursolic and oleanolic acid derivatives with cholinesterase inhibiting potential. *Bioorg. Chem.* **2019**, *85*, 23–32.
7. Del Prete, D.; Tagliatela-Scafati, O.; Minassi, A.; Sirignano, C.; Cruz, C.; Bellido, M. L.; Munoz, E.; Appendino, G., Electrophilic Triterpenoid Enones: A Comparative Thiol-Trapping and Bioactivity Study. *J. Nat. Prod.* **2017**, *80*, (8), 2276–2283.
8. Heller, L.; Schwarz, S.; Perl, V.; Koewitsch, A.; Siewert, B.; Csuk, R., Incorporation of a Michael acceptor enhances the antitumor activity of triterpenoid acids. *Eur. J. Med. Chem.* **2015**, *101*, 391–399.
9. Honda, T.; Gribble, G. W.; Suh, N.; Finlay, H. J.; Rounds, B. V.; Bore, L.; Favaloro, F. G., Jr.; Wang, Y.; Sporn, M. B., Novel Synthetic Oleanane and Ursane Triterpenoids with Various Enone Functionalities in Ring A as Inhibitors of Nitric Oxide Production in Mouse Macrophages. *J. Med. Chem.* **2000**, *43*, (9), 1866–1877.

**<sup>1</sup>H-NMR, <sup>13</sup>C-NMR, HRMS spectra of Synthetic Compounds**

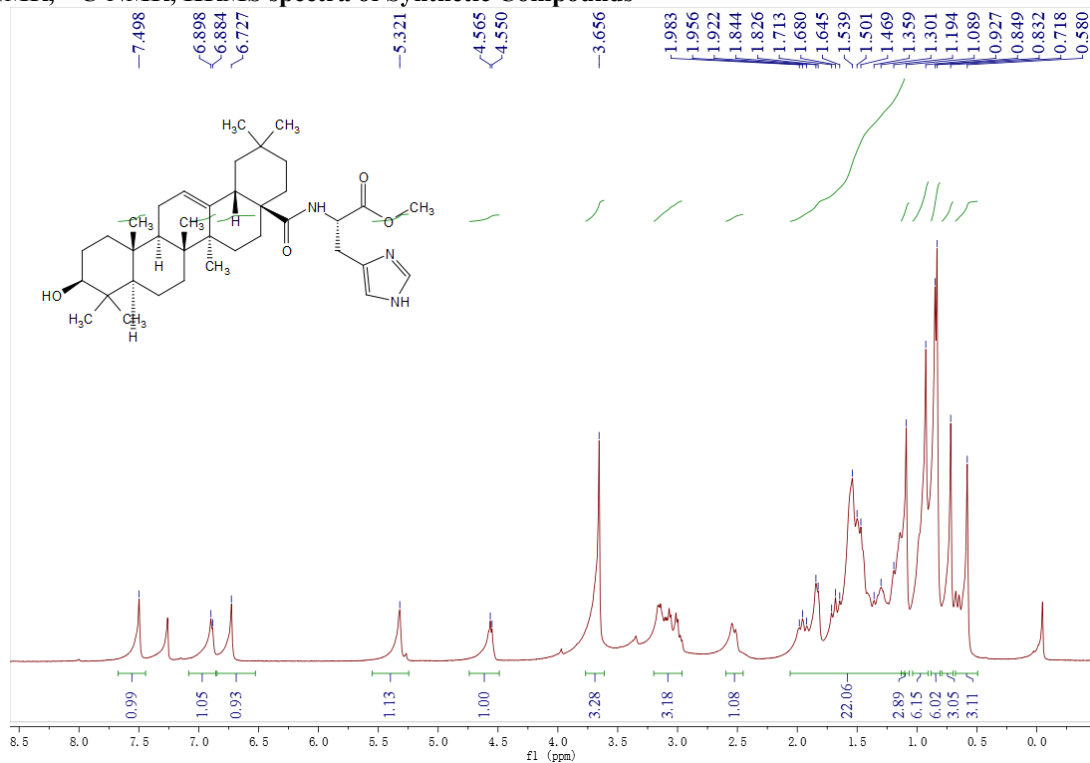

<sup>1</sup>H spectrum of OA-His

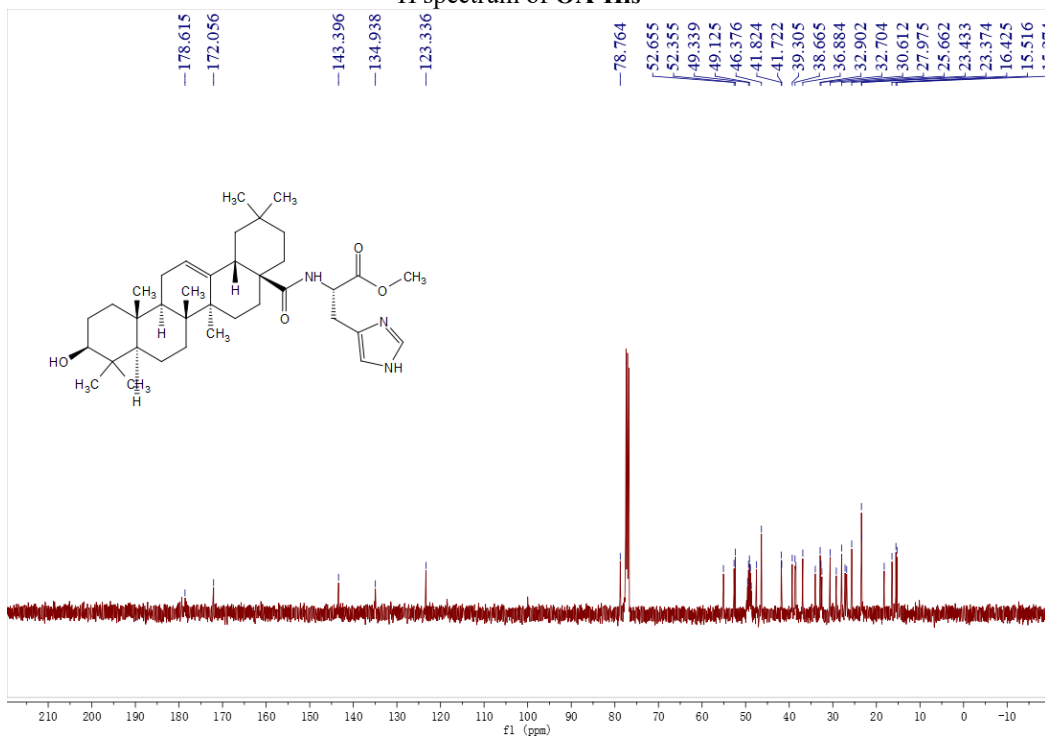

<sup>13</sup>C spectrum of OA-His

Measured region for 608.4415 m/z

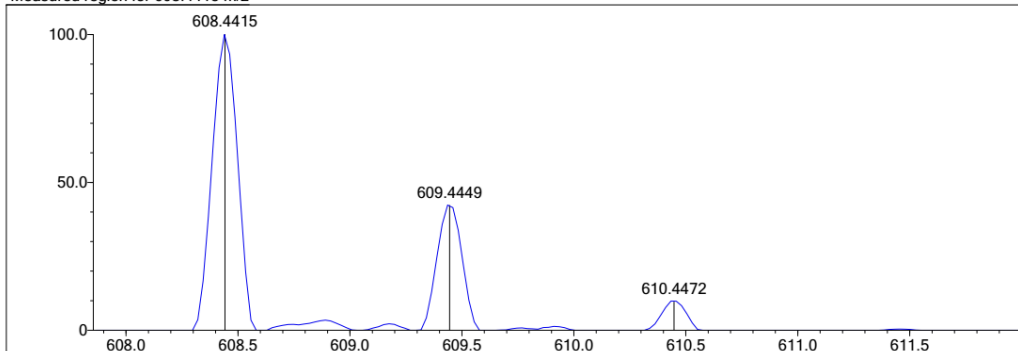

C37 H57 N3 O4 [M+H]<sup>+</sup> : Predicted region for 608.4422 m/z

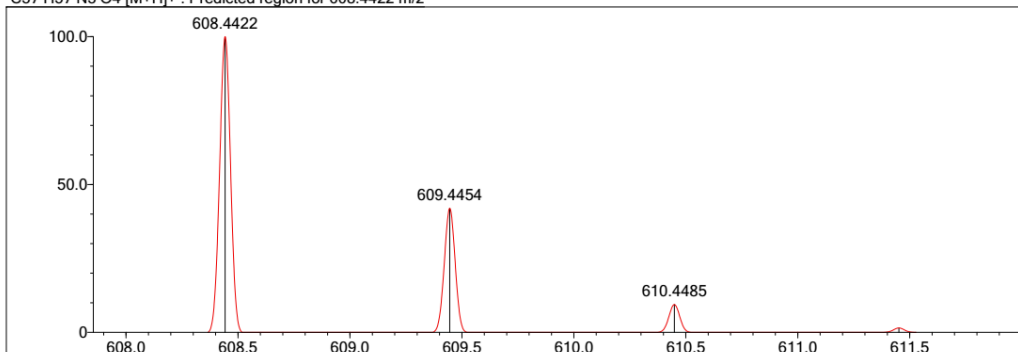

| Rank | Score | Formula (M)   | Ion                | Meas. m/z | Pred. m/z | Df. (mDa) | Df. (ppm) | Iso   | DBE  |
|------|-------|---------------|--------------------|-----------|-----------|-----------|-----------|-------|------|
| 1    | 99.07 | C37 H57 N3 O4 | [M+H] <sup>+</sup> | 608.4415  | 608.4422  | -0.7      | -1.15     | 99.44 | 11.0 |

HRMS spectrum of **OA-His**

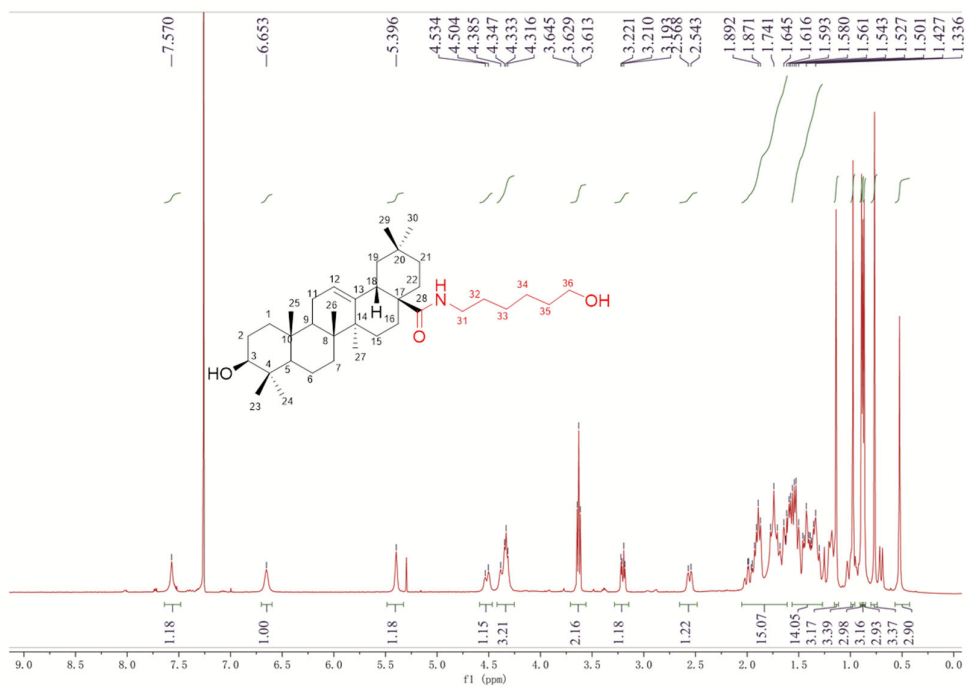

<sup>1</sup>H NMR spectrum of **3b**

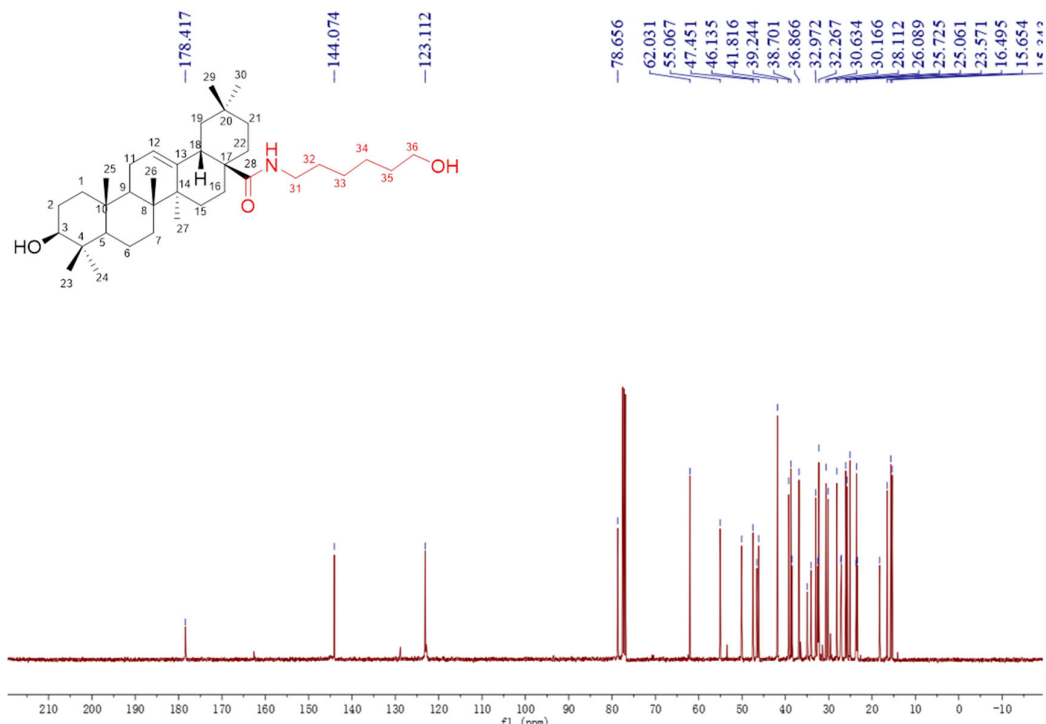

<sup>13</sup>C NMR spectrum of **3b**

Measured region for 578.4550 m/z

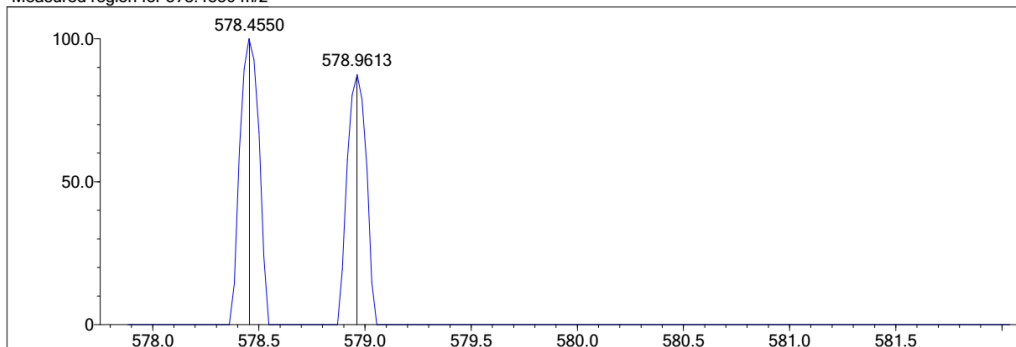

C36 H61 N O3 [M+Na]<sup>+</sup> : Predicted region for 578.4544 m/z

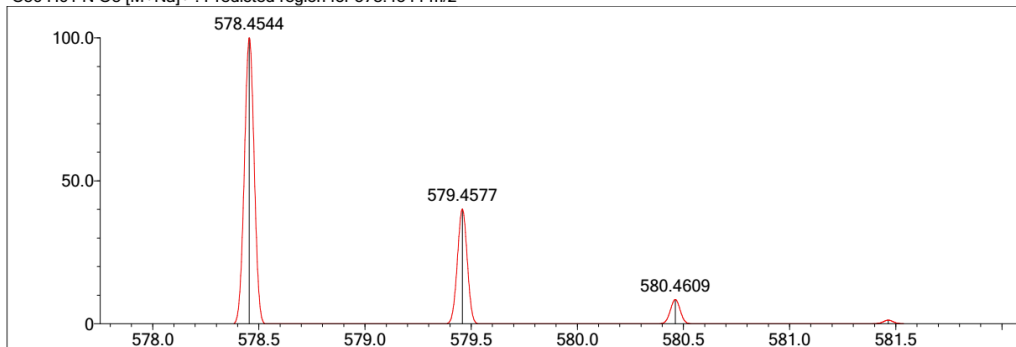

| Rank | Score | Formula (M)  | Ion                 | Meas. m/z | Pred. m/z | Df. (mDa) | Df. (ppm) | Iso  | DBE |
|------|-------|--------------|---------------------|-----------|-----------|-----------|-----------|------|-----|
| 3    | 0.00  | C36 H61 N O3 | [M+Na] <sup>+</sup> | 578.4550  | 578.4544  | 0.6       | 1.04      | 0.00 | 7.0 |

HRMS spectrum of **3b**

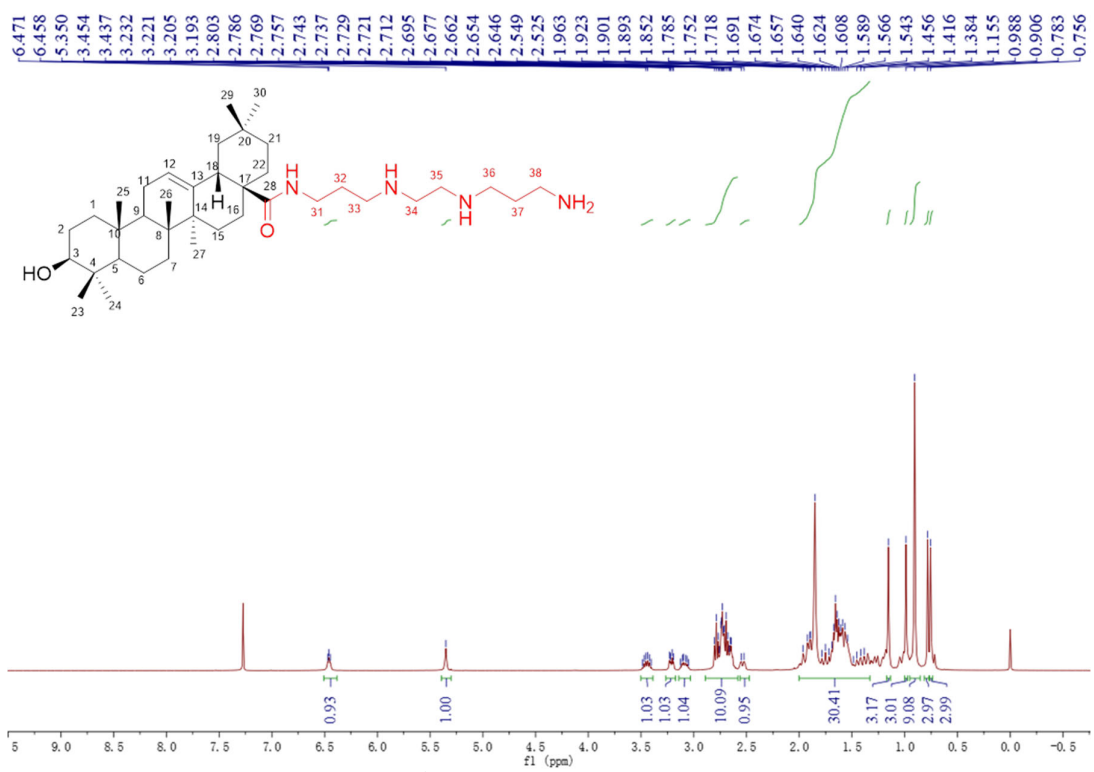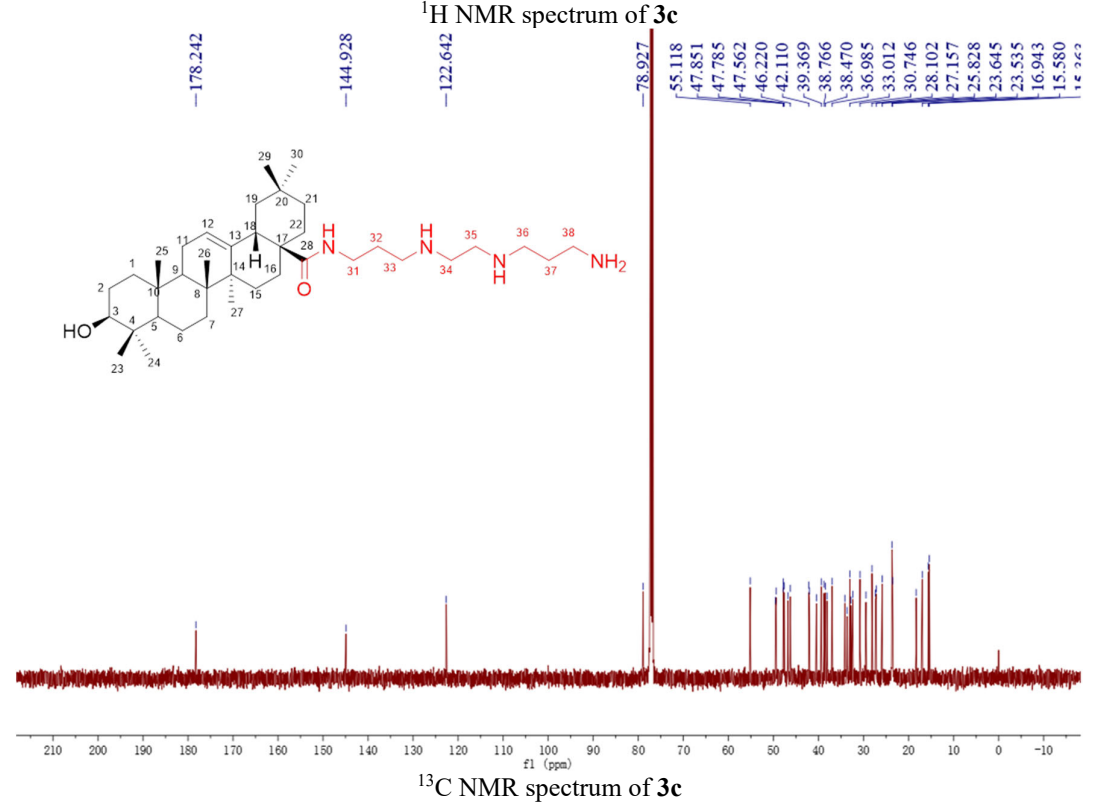

Measured region for 613.5422 m/z

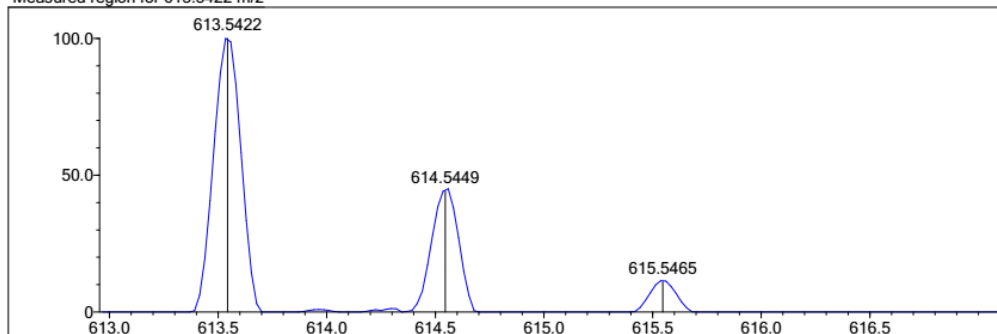

C38 H68 N4 O2 [M+H]<sup>+</sup> : Predicted region for 613.5415 m/z

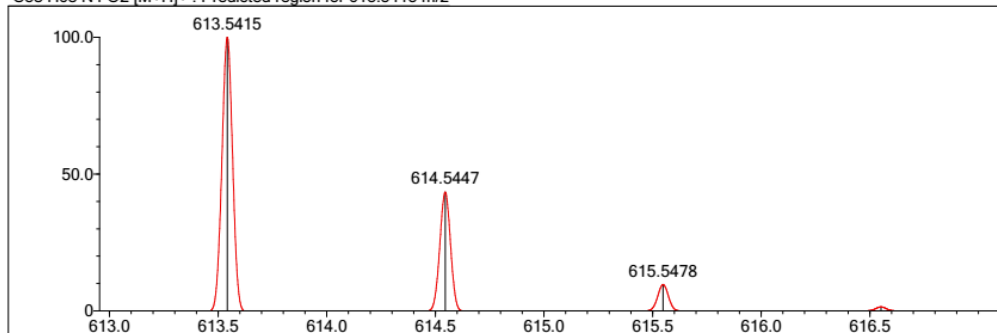

| Rank | Score | Formula (M)   | Ion                | Meas. m/z | Pred. m/z | Df. (mDa) | Df. (ppm) | Iso   | DBE |
|------|-------|---------------|--------------------|-----------|-----------|-----------|-----------|-------|-----|
| 1    | 92.32 | C38 H68 N4 O2 | [M+H] <sup>+</sup> | 613.5422  | 613.5415  | 0.7       | 1.14      | 92.64 | 7.0 |

HRMS spectrum of 3c

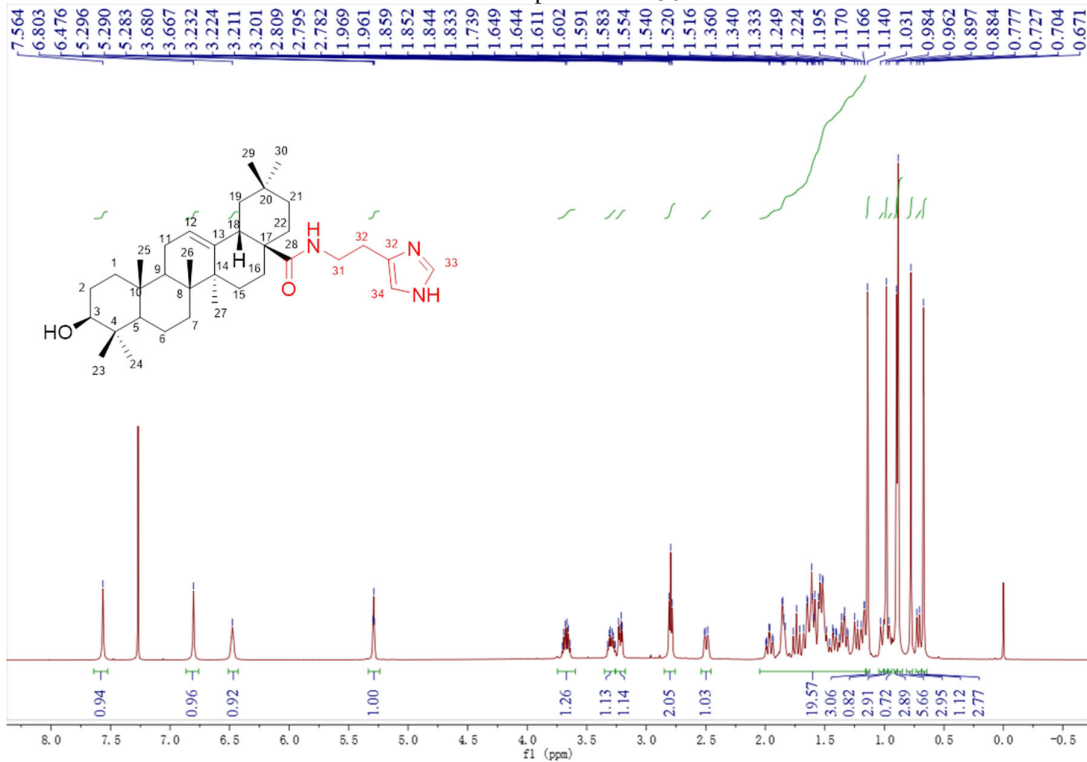

<sup>1</sup>H spectrum of 3d



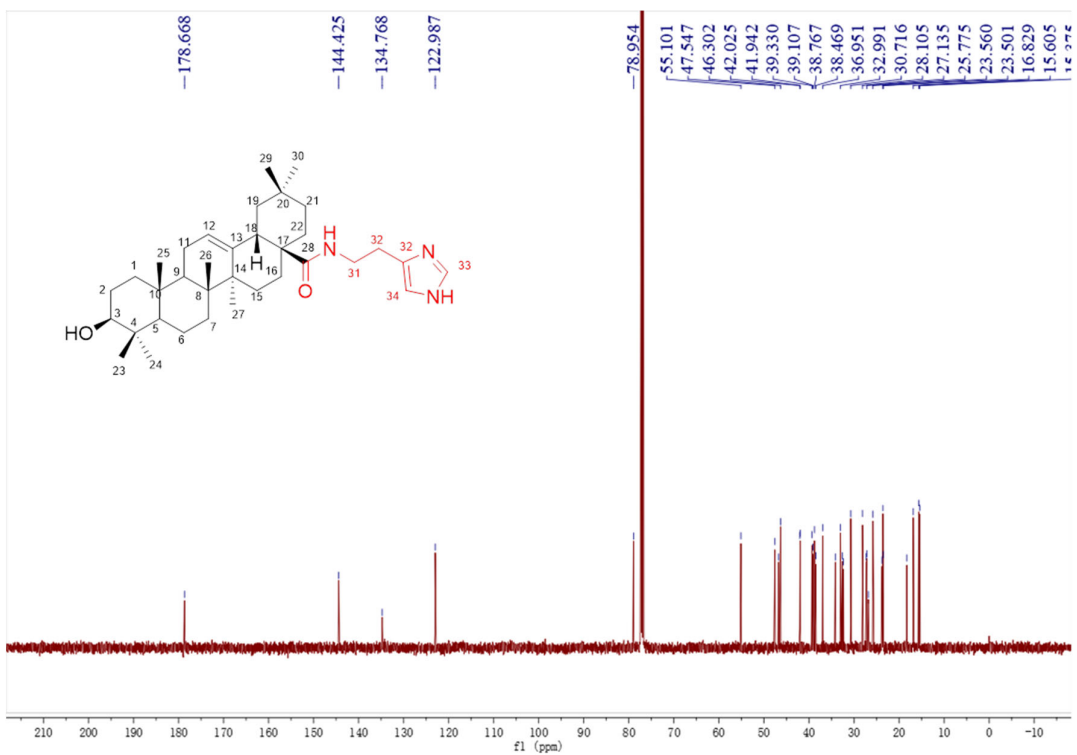

$^{13}\text{C}$  spectrum of **3d**

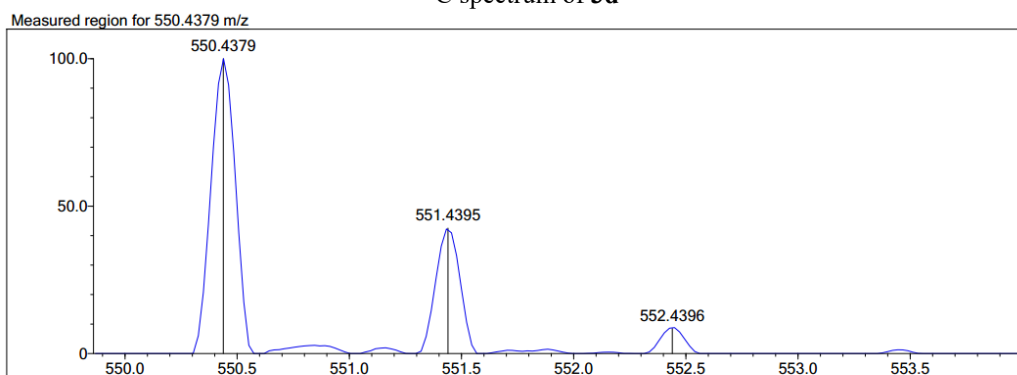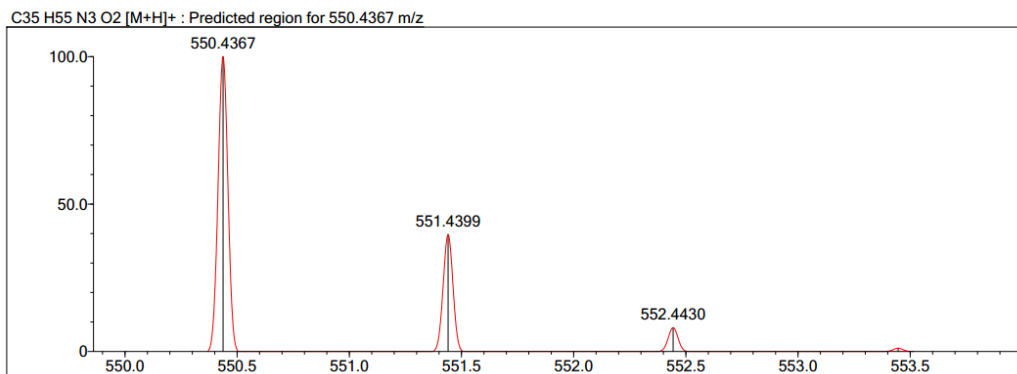

| Rank | Score | Formula (M)   | Ion                | Meas. m/z | Pred. m/z | Df. (mDa) | Df. (ppm) | Iso   | DBE  |
|------|-------|---------------|--------------------|-----------|-----------|-----------|-----------|-------|------|
| 3    | 89.92 | C35 H55 N3 O2 | [M+H] <sup>+</sup> | 550.4379  | 550.4367  | 1.2       | 2.18      | 92.65 | 10.0 |

HRMS spectrum of **3d**

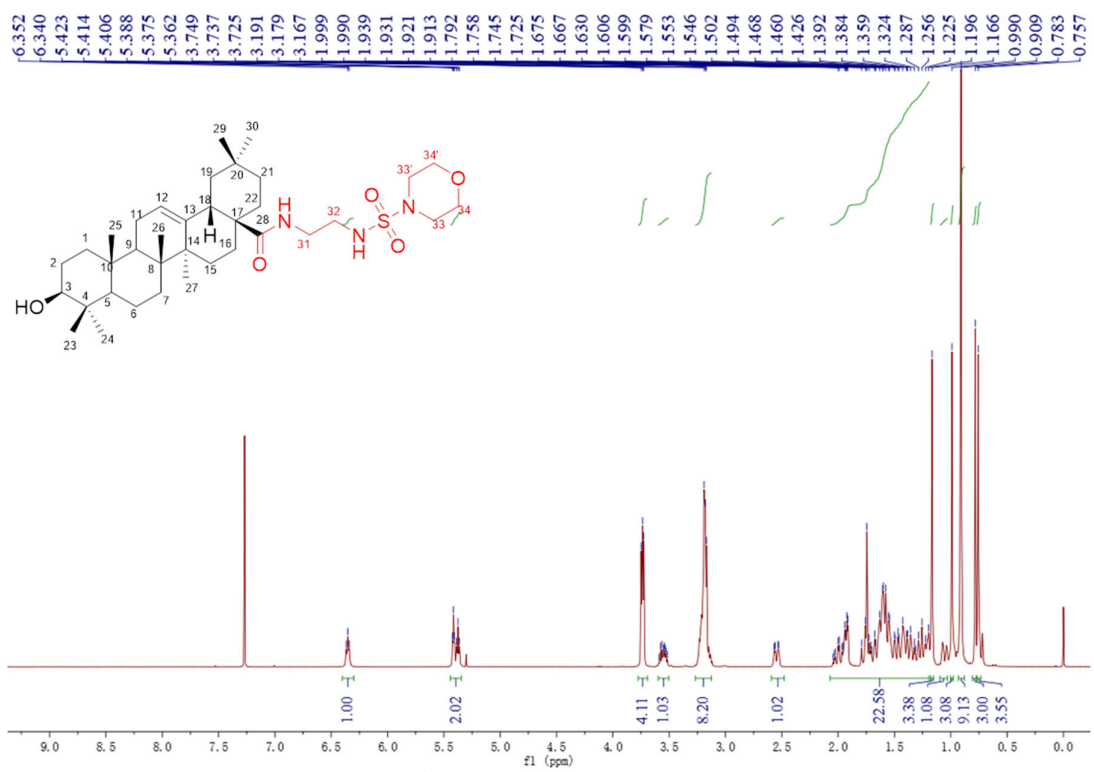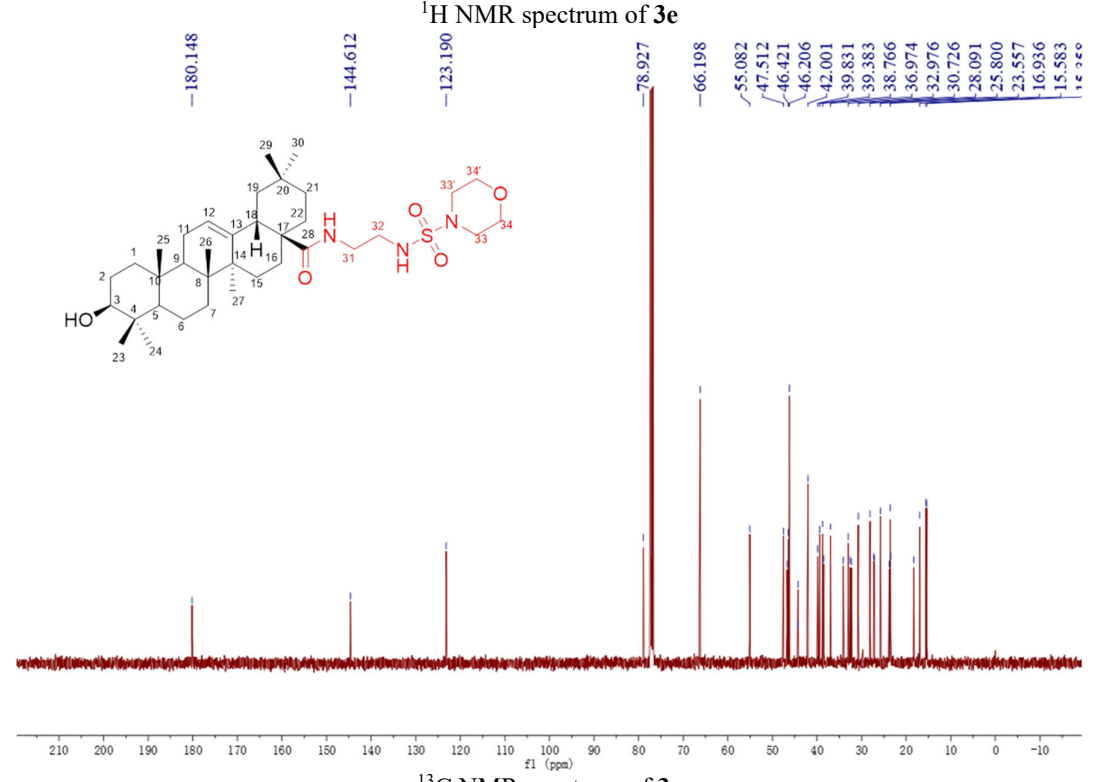

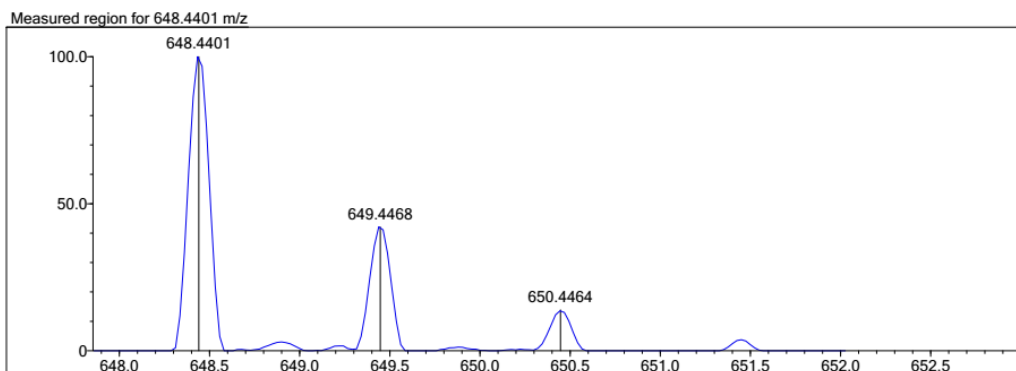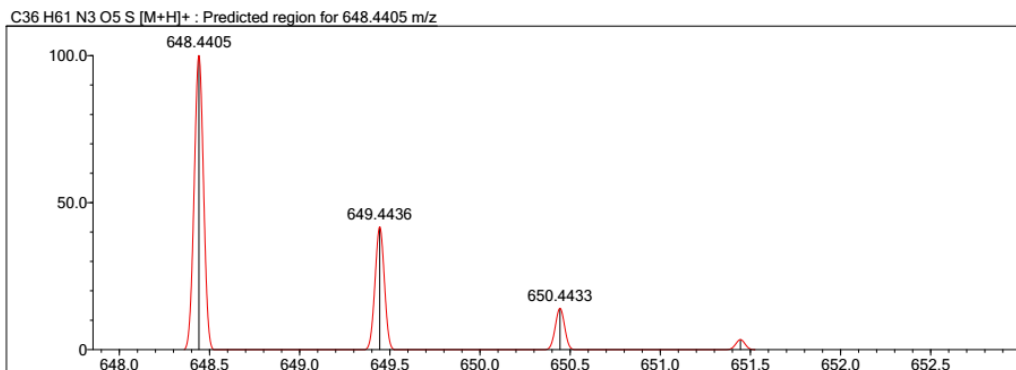

| Rank | Score  | Formula (M)     | Ion                | Meas. m/z | Pred. m/z | Df. (mDa) | Df. (ppm) | Iso    | DBE |
|------|--------|-----------------|--------------------|-----------|-----------|-----------|-----------|--------|-----|
| 1    | 100.00 | C36 H61 N3 O5 S | [M+H] <sup>+</sup> | 648.4401  | 648.4405  | -0.4      | -0.62     | 100.00 | 8.0 |

HRMS spectrum of **3e**

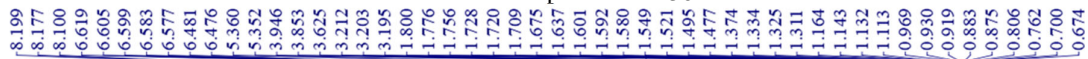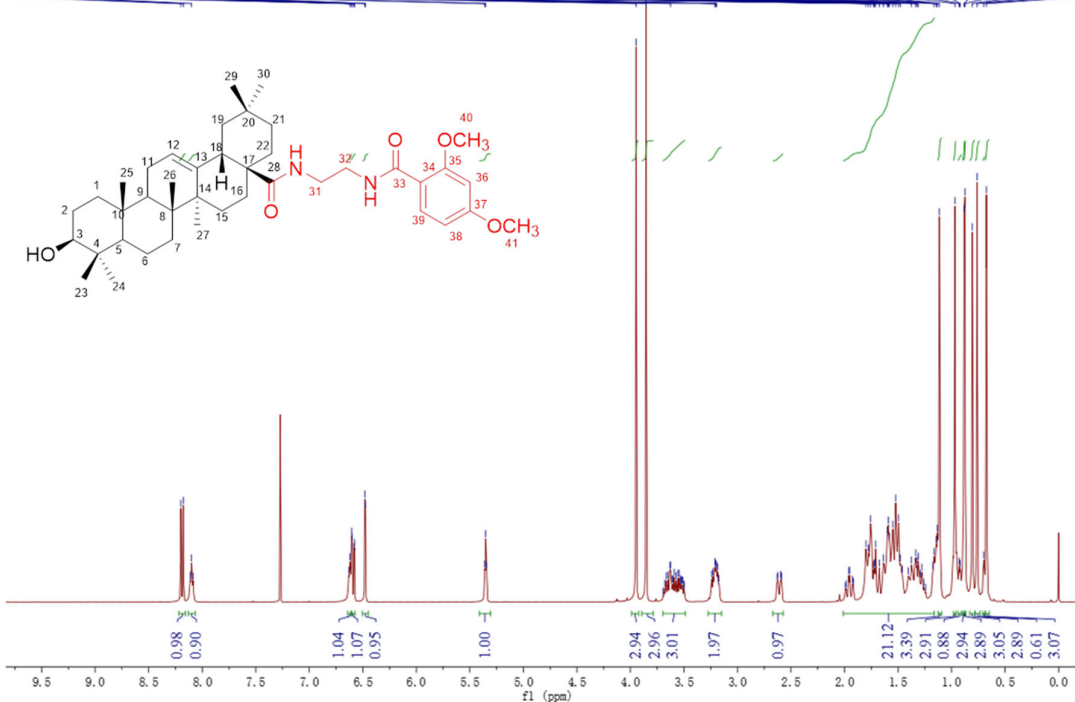

<sup>1</sup>H spectrum of **3f**

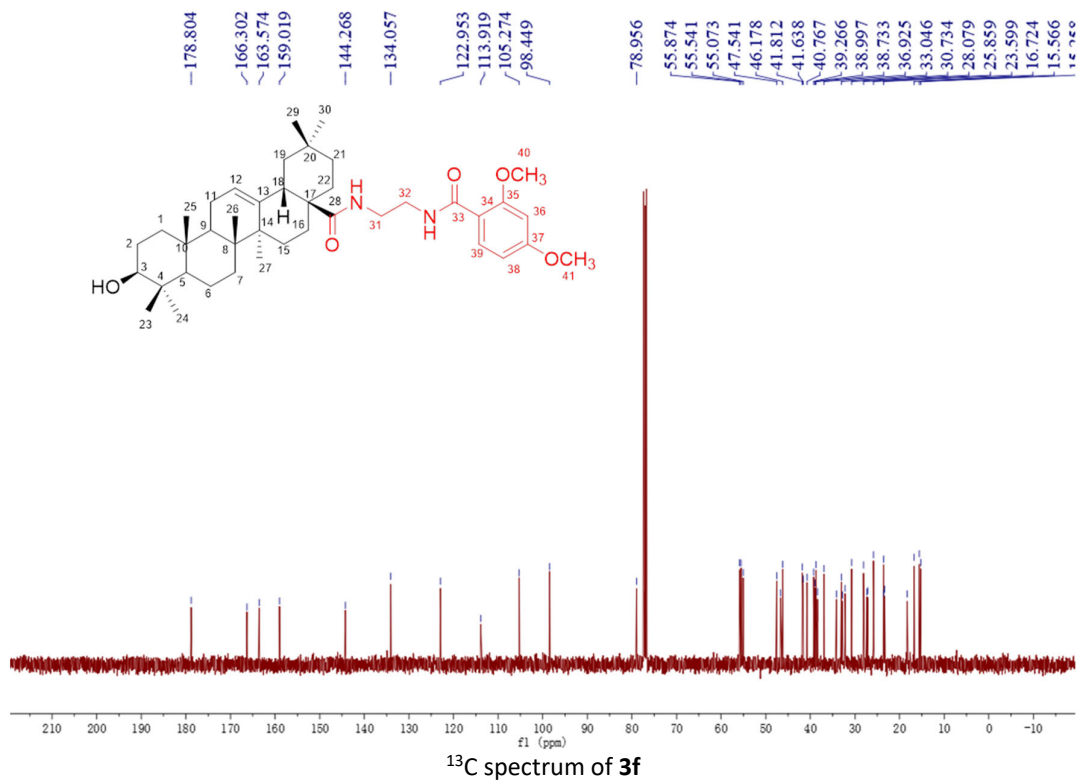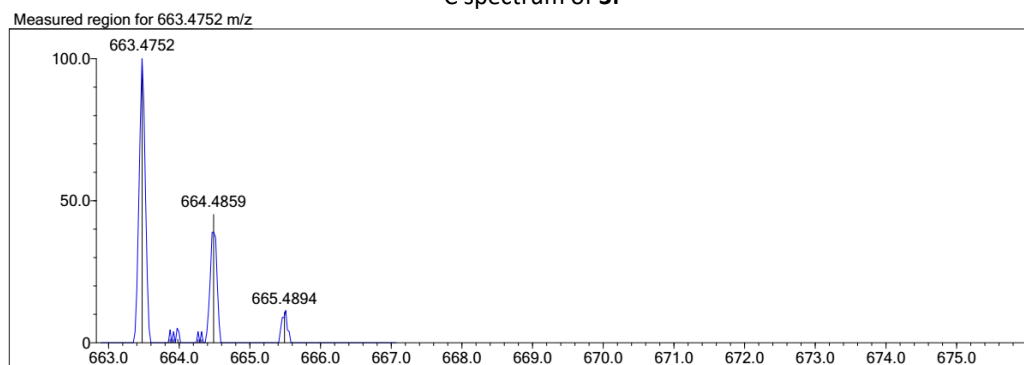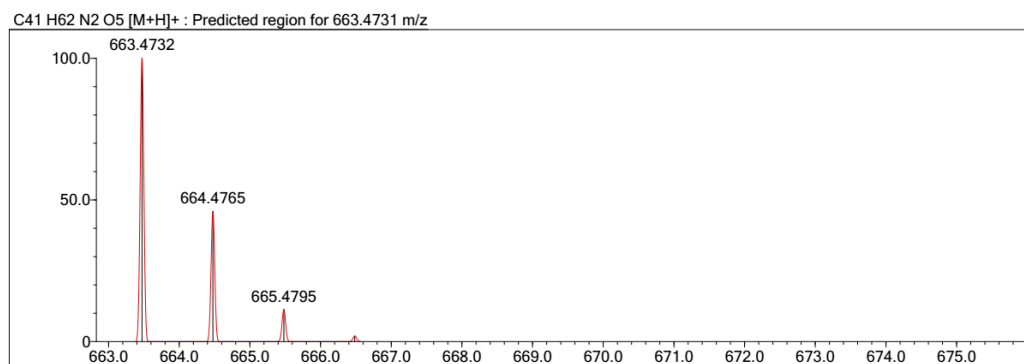

| Rank | Score | Formula (M)   | Ion                | Meas. m/z | Pred. m/z | Df. (mDa) | Df. (ppm) | Iso   | DBE  |
|------|-------|---------------|--------------------|-----------|-----------|-----------|-----------|-------|------|
| 2    | 26.42 | C41 H62 N2 O5 | [M+H] <sup>+</sup> | 663.4752  | 663.4731  | 2.1       | 3.17      | 27.94 | 12.0 |

HRMS spectrum of **3f**

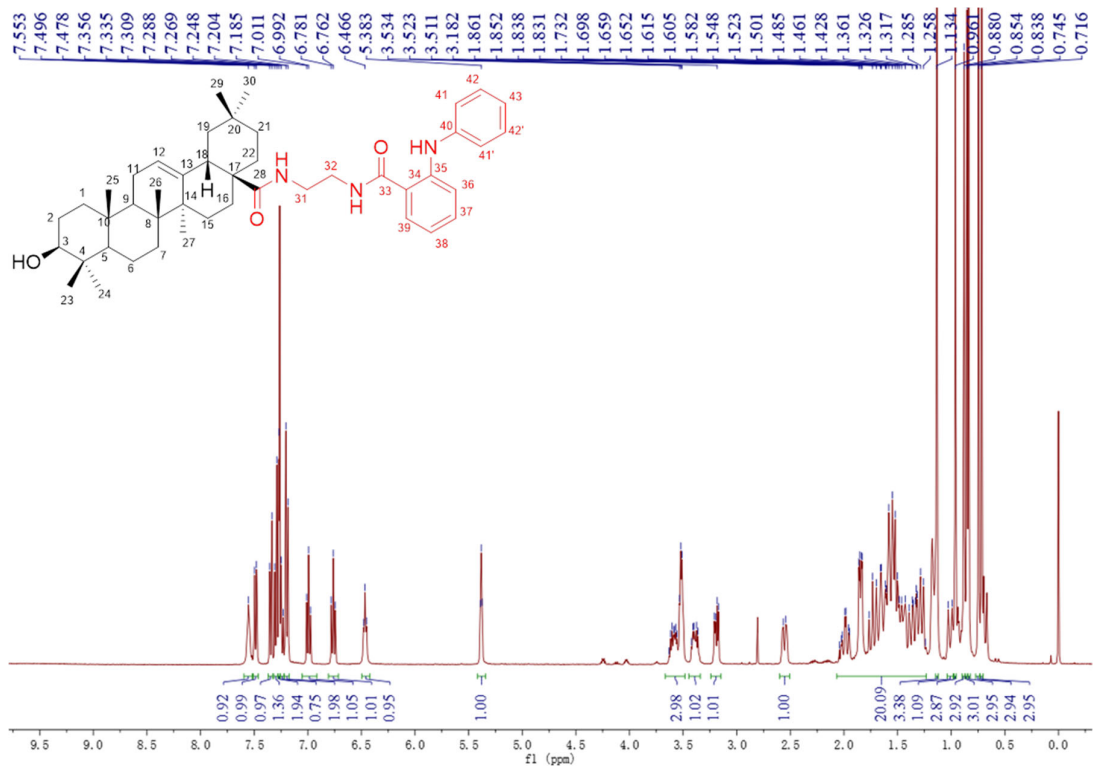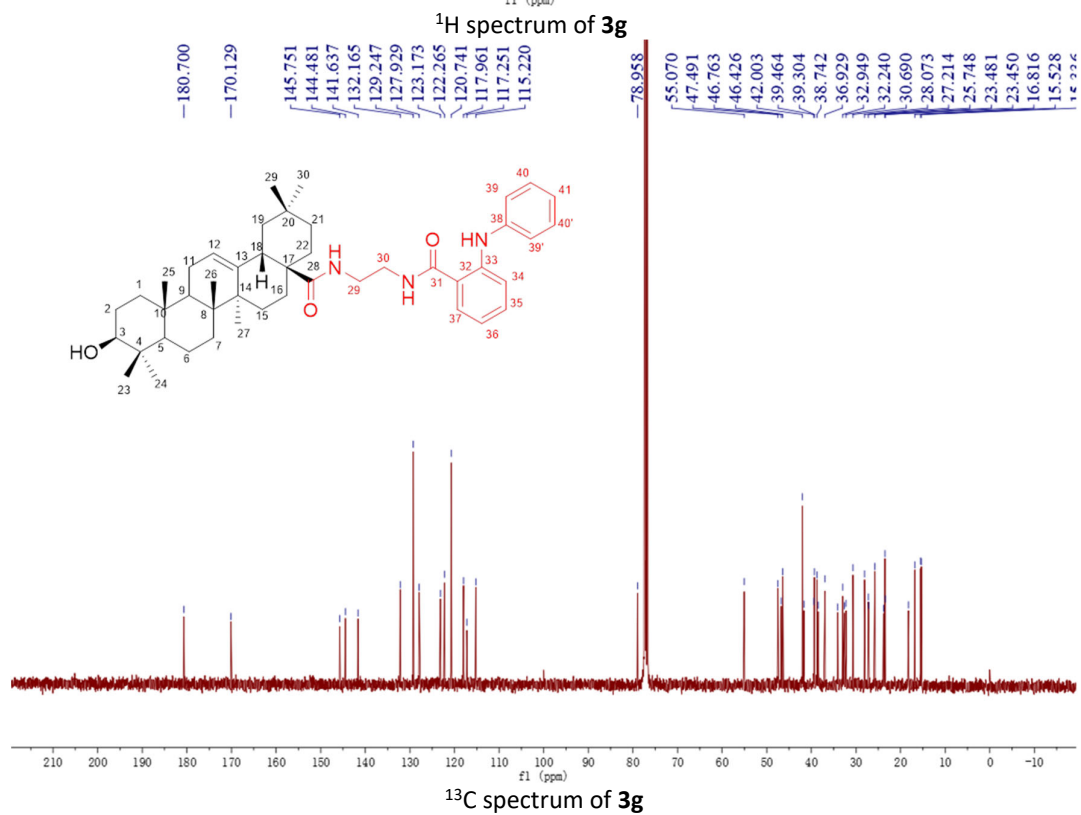

Measured region for 694.4936 m/z

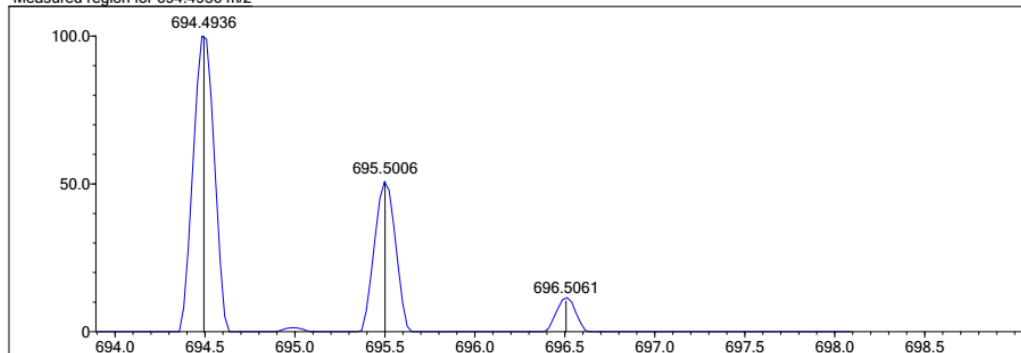

C45 H63 N3 O3 [M+H]<sup>+</sup> : Predicted region for 694.4942 m/z

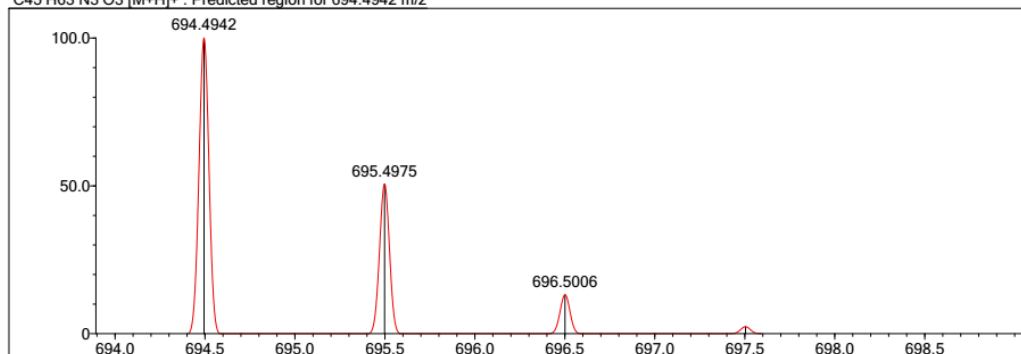

| Rank | Score  | Formula (M)   | Ion                | Meas. m/z | Pred. m/z | Df. (mDa) | Df. (ppm) | Iso    | DBE  |
|------|--------|---------------|--------------------|-----------|-----------|-----------|-----------|--------|------|
| 1    | 100.00 | C45 H63 N3 O3 | [M+H] <sup>+</sup> | 694.4936  | 694.4942  | -0.6      | -0.86     | 100.00 | 16.0 |

HRMS spectrum of **3g**

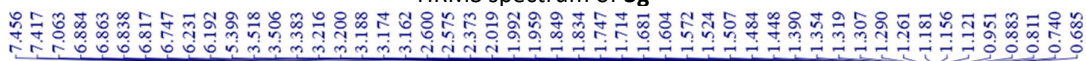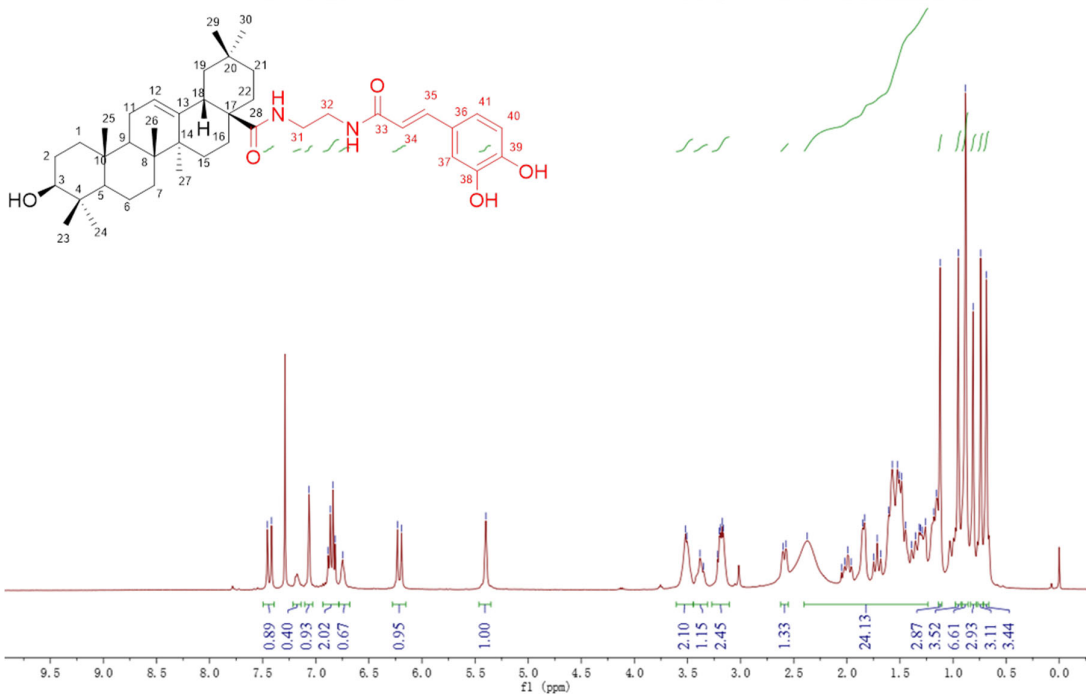

<sup>1</sup>H NMR spectrum of **3h**

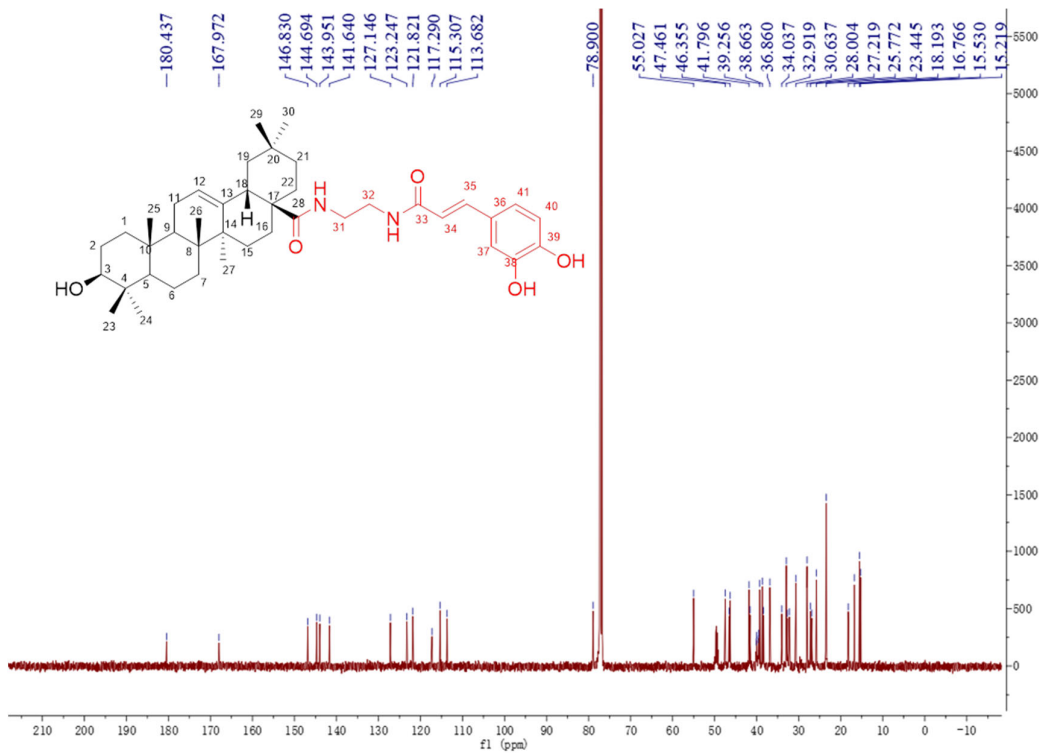

$^{13}\text{C}$  NMR spectrum of **3h**

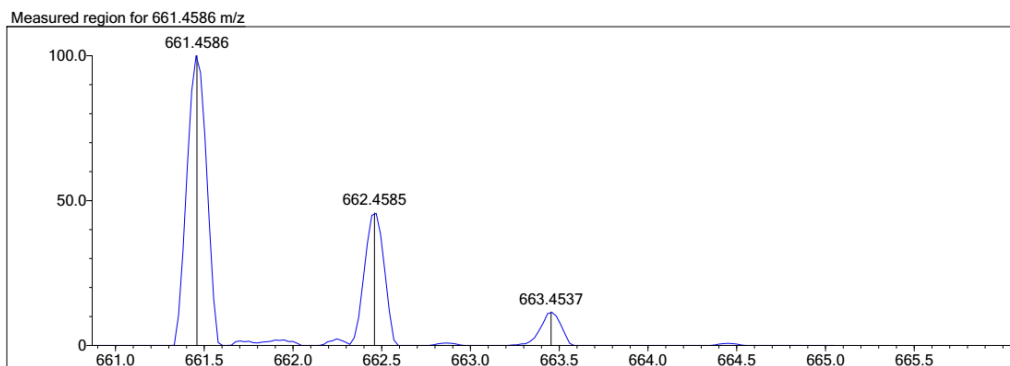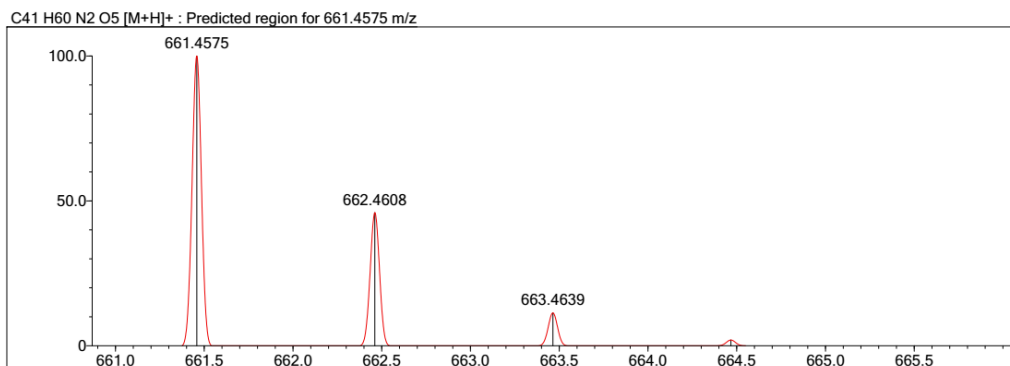

| Rank | Score | Formula (M)                                                   | Ion                | Meas. m/z | Pred. m/z | Df. (mDa) | Df. (ppm) | Iso   | DBE  |
|------|-------|---------------------------------------------------------------|--------------------|-----------|-----------|-----------|-----------|-------|------|
| 3    | 82.86 | C <sub>41</sub> H <sub>60</sub> N <sub>2</sub> O <sub>5</sub> | [M+H] <sup>+</sup> | 661.4586  | 661.4575  | 1.1       | 1.66      | 84.25 | 13.0 |

HRMS spectrum of **3h**

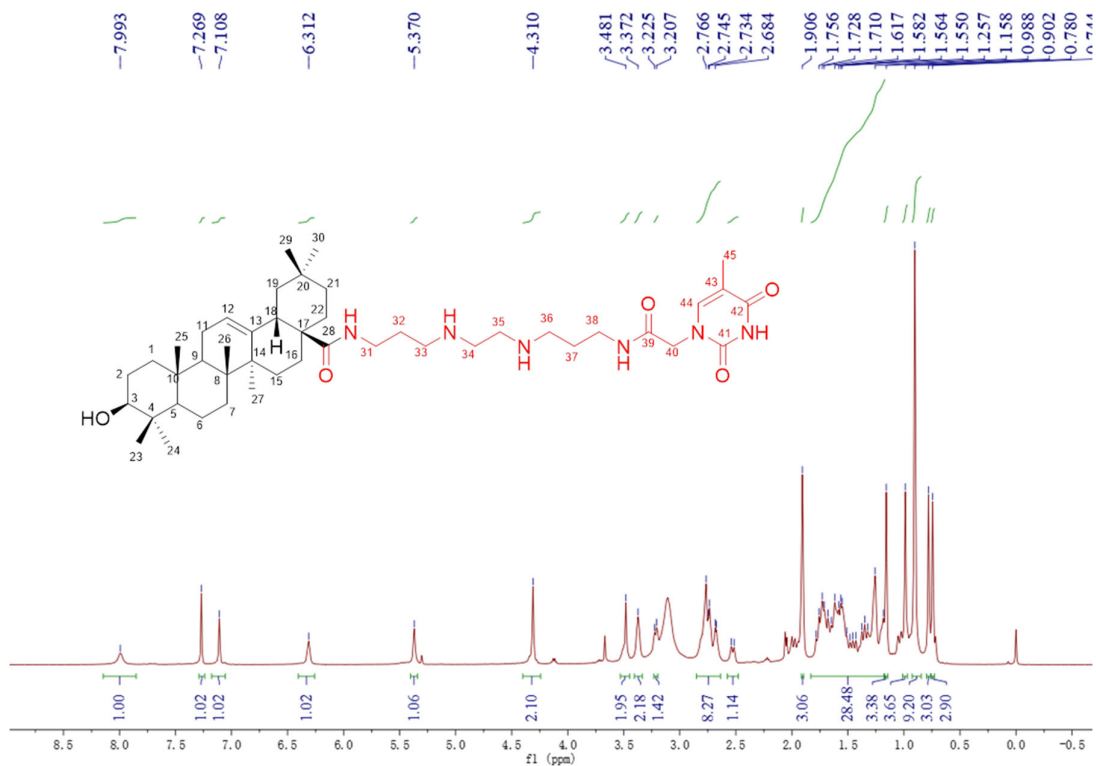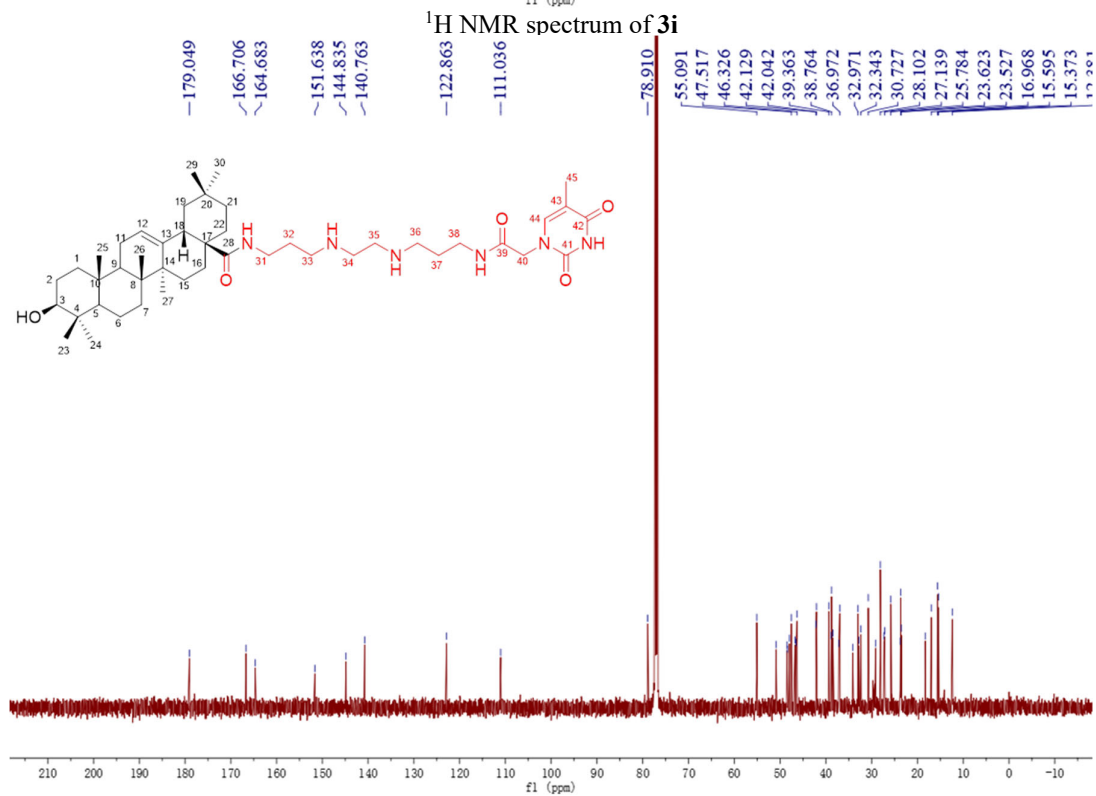



Measured region for 779.5790 m/z

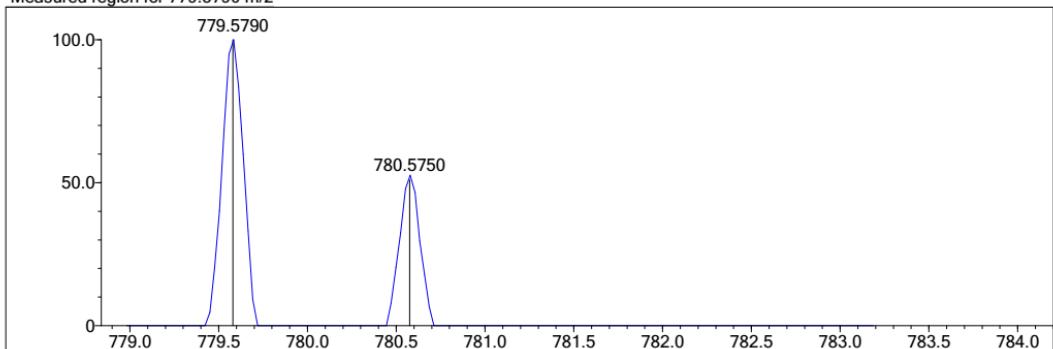

C45 H74 N6 O5 [M+H]<sup>+</sup> : Predicted region for 779.5793 m/z

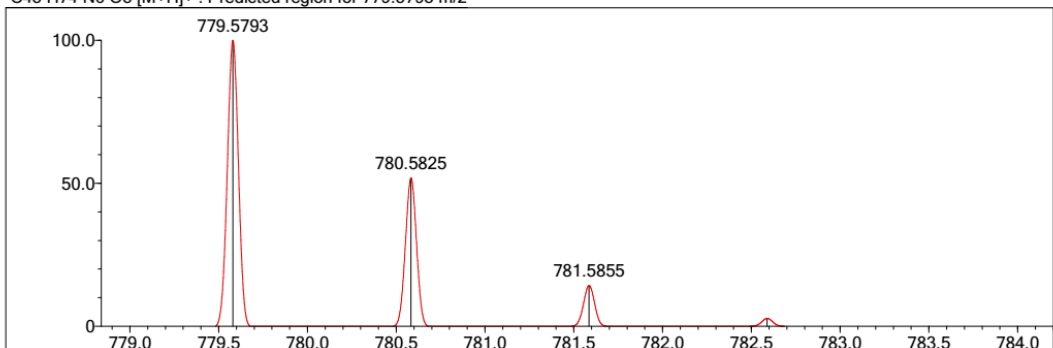

| Rank | Score | Formula (M)   | Ion                | Meas. m/z | Pred. m/z | Df. (mDa) | Df. (ppm) | Iso  | DBE  |
|------|-------|---------------|--------------------|-----------|-----------|-----------|-----------|------|------|
| 1    | 0.00  | C45 H74 N6 O5 | [M+H] <sup>+</sup> | 779.5790  | 779.5793  | -0.3      | -0.38     | 0.00 | 12.0 |

HRMS spectrum of 3i

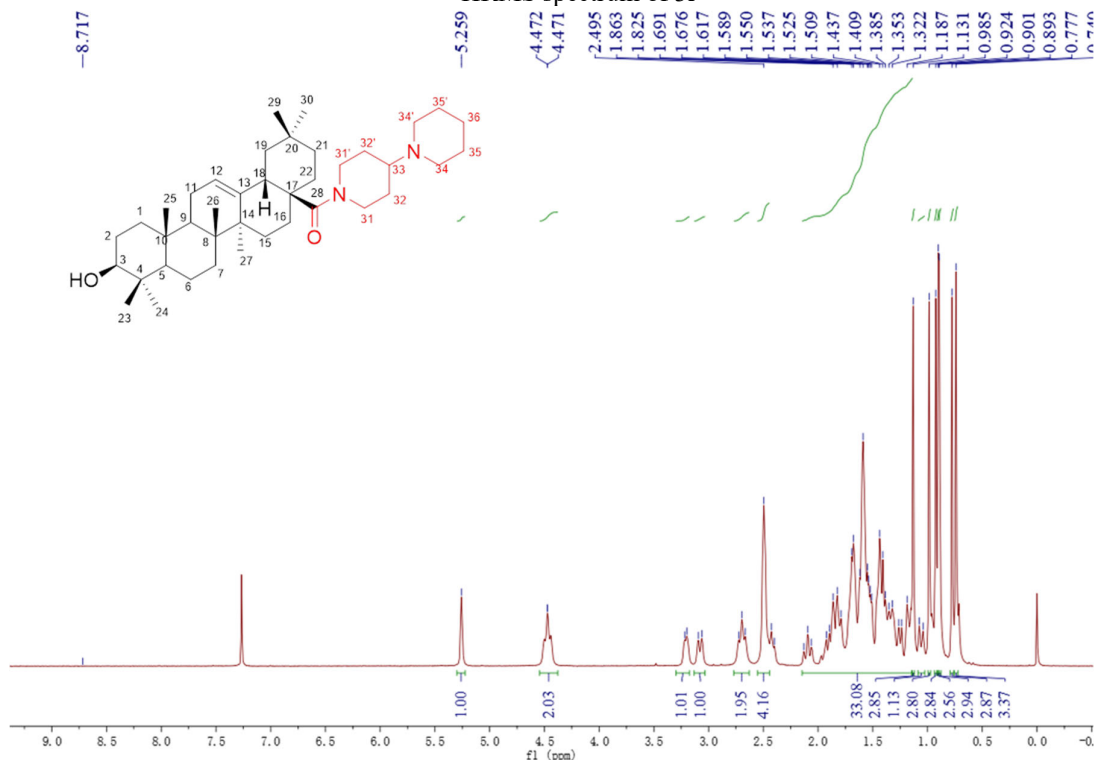

<sup>1</sup>H NMR spectrum of 3j

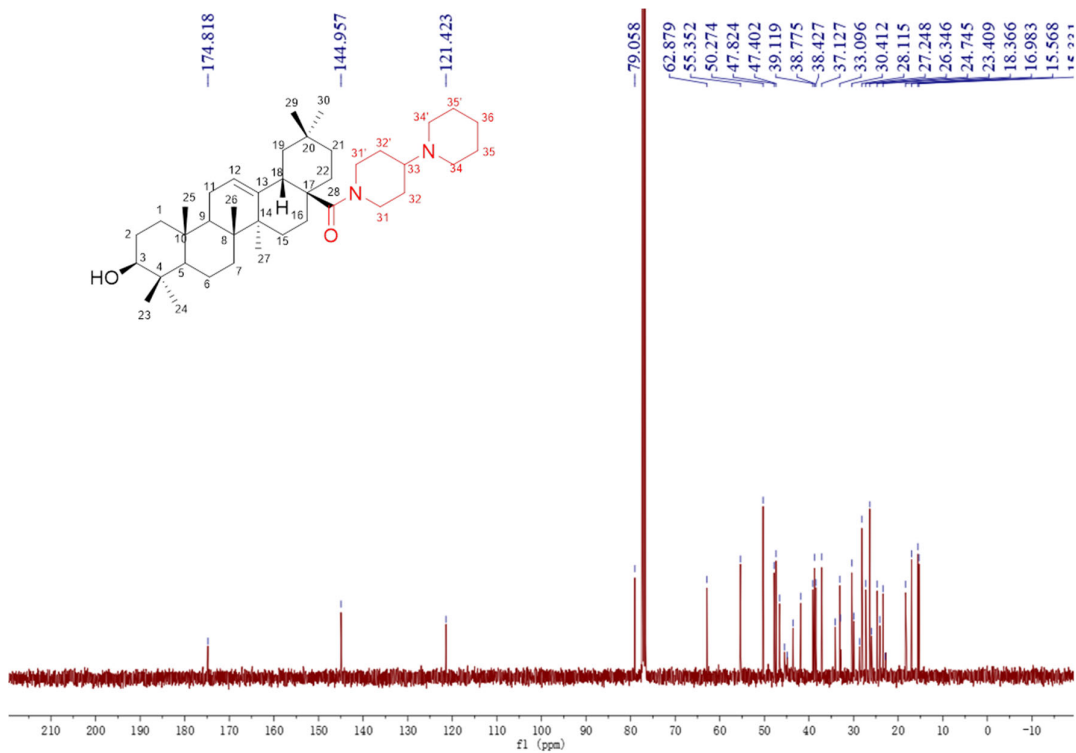

$^{13}\text{C}$  NMR spectrum of **3j**

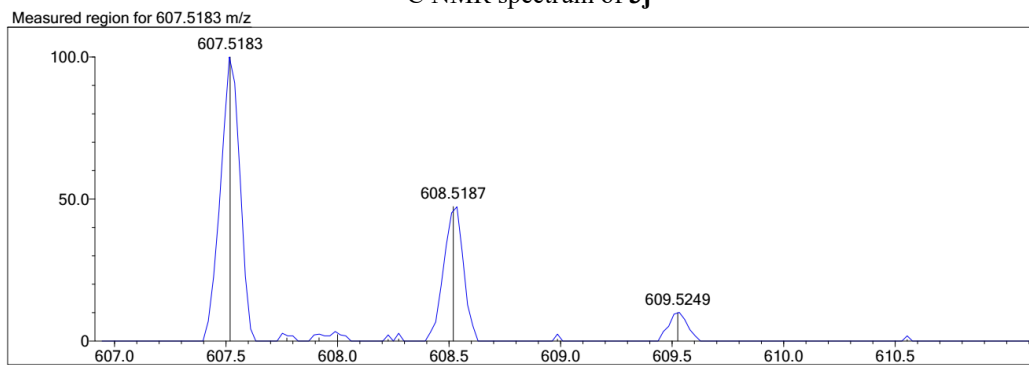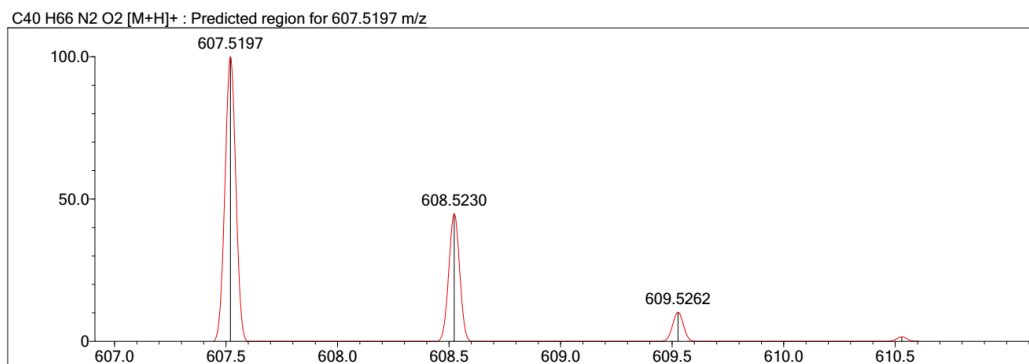

| Rank | Score | Formula (M)   | Ion                | Meas. m/z | Pred. m/z | Df. (mDa) | Df. (ppm) | Iso    | DBE |
|------|-------|---------------|--------------------|-----------|-----------|-----------|-----------|--------|-----|
| 2    | 96.75 | C40 H66 N2 O2 | [M+H] <sup>+</sup> | 607.5183  | 607.5197  | -1.4      | -2.30     | 100.00 | 9.0 |

HRMS spectrum of **3j**

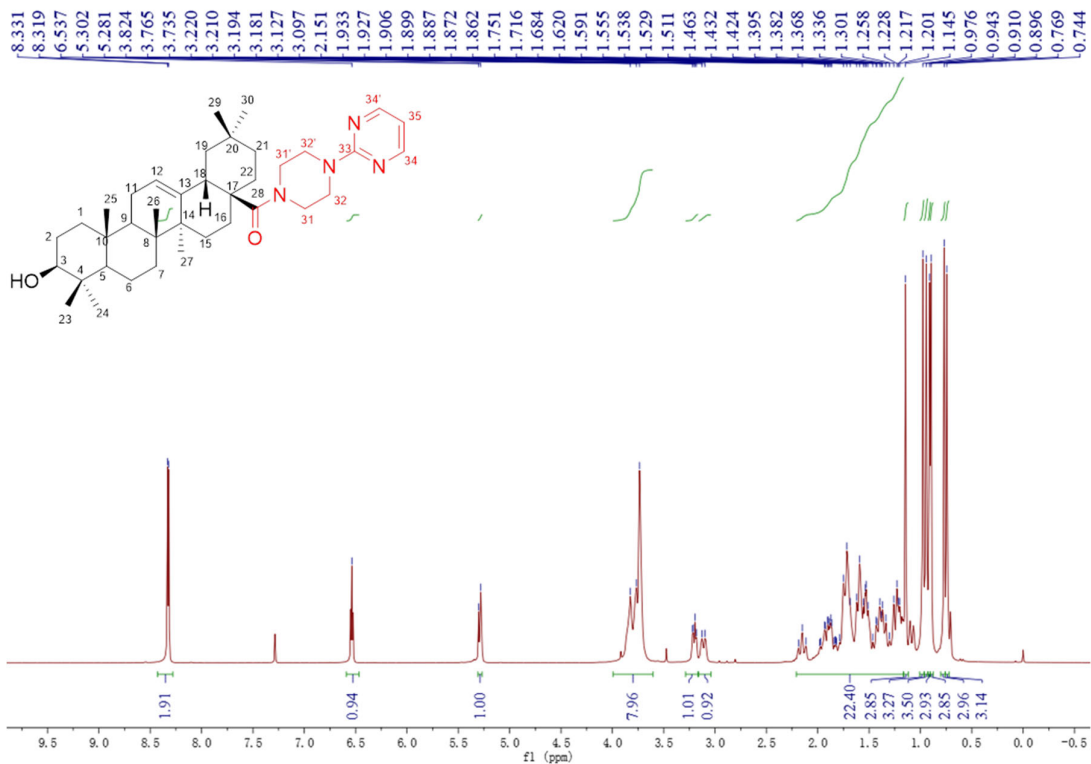

**<sup>1</sup>H NMR spectrum of 3k**

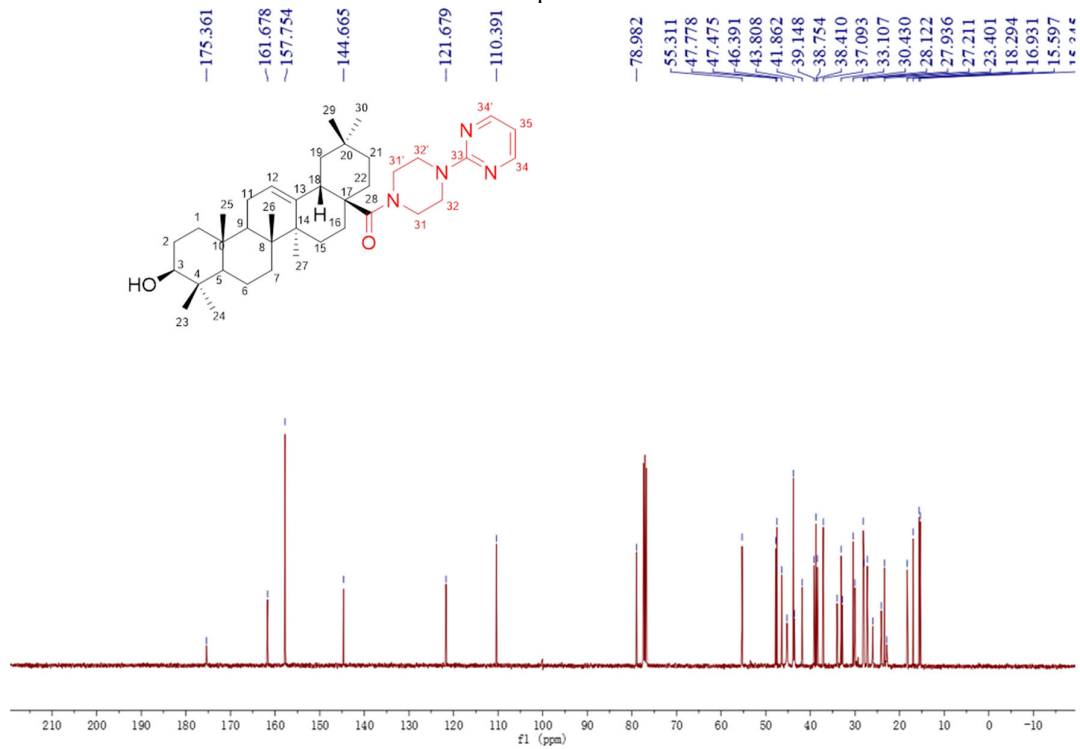

**<sup>13</sup>C NMR spectrum of 3k**

Measured region for 603.4633 m/z

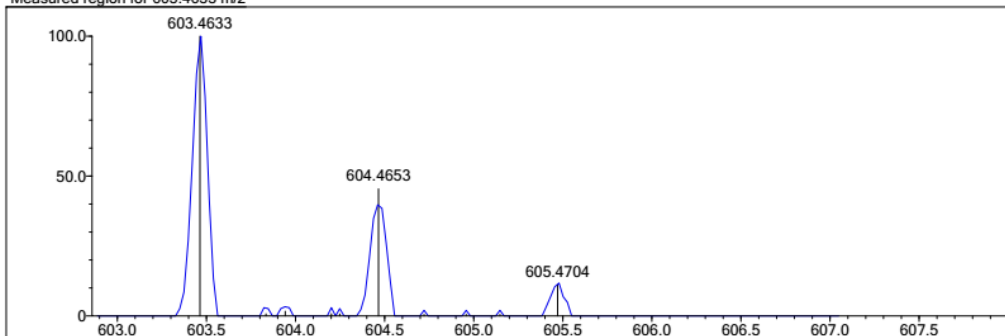

C38 H58 N4 O2 [M+H]<sup>+</sup> : Predicted region for 603.4633 m/z

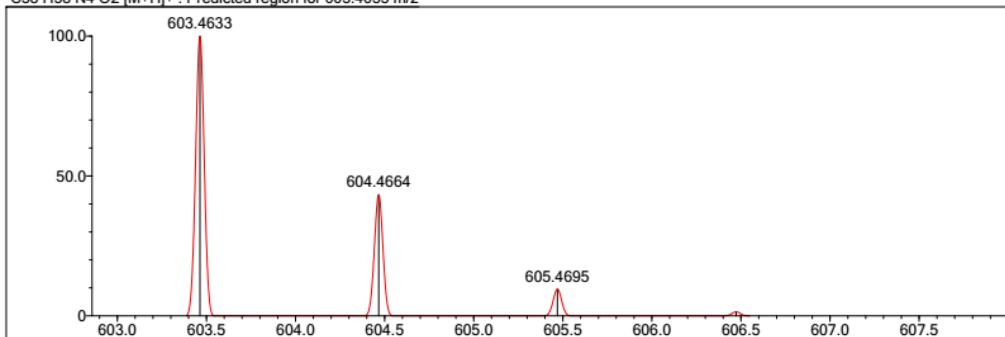

| Rank | Score | Formula (M)   | Ion                | Meas. m/z | Pred. m/z | Df. (mDa) | Df. (ppm) | Iso   | DBE  |
|------|-------|---------------|--------------------|-----------|-----------|-----------|-----------|-------|------|
| 2    | 86.47 | C38 H58 N4 O2 | [M+H] <sup>+</sup> | 603.4633  | 603.4633  | 0.0       | 0.00      | 86.47 | 12.0 |

HRMS spectrum of 3k

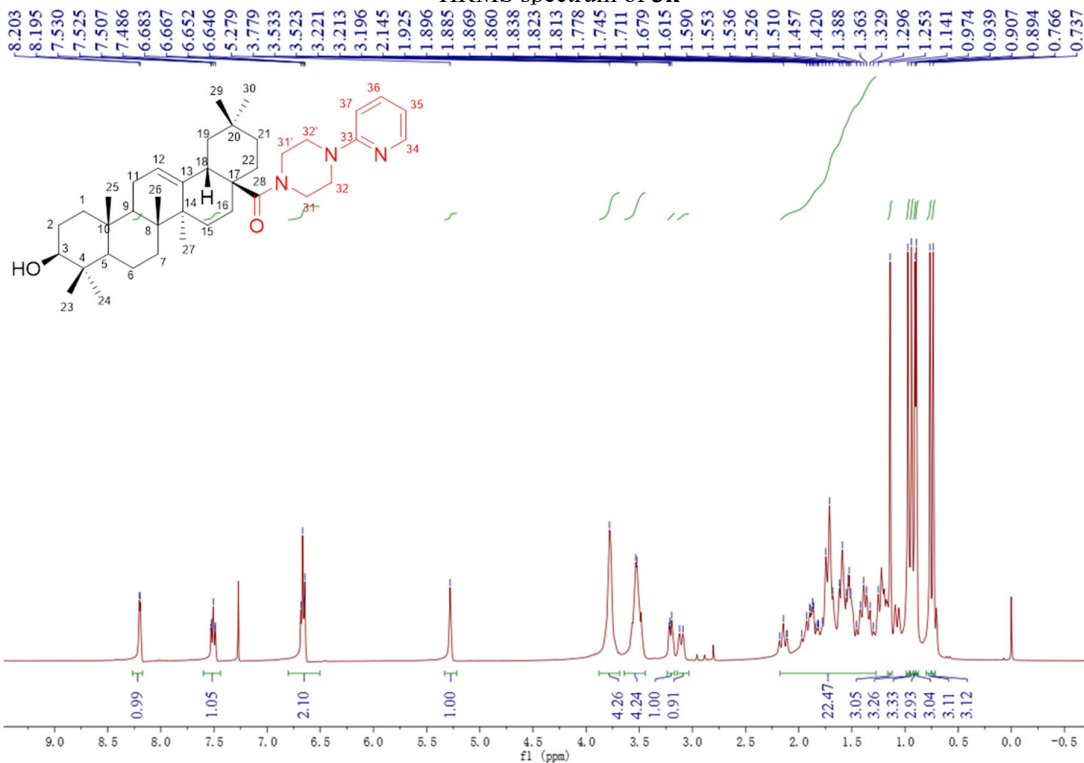

<sup>1</sup>H spectrum of 3l

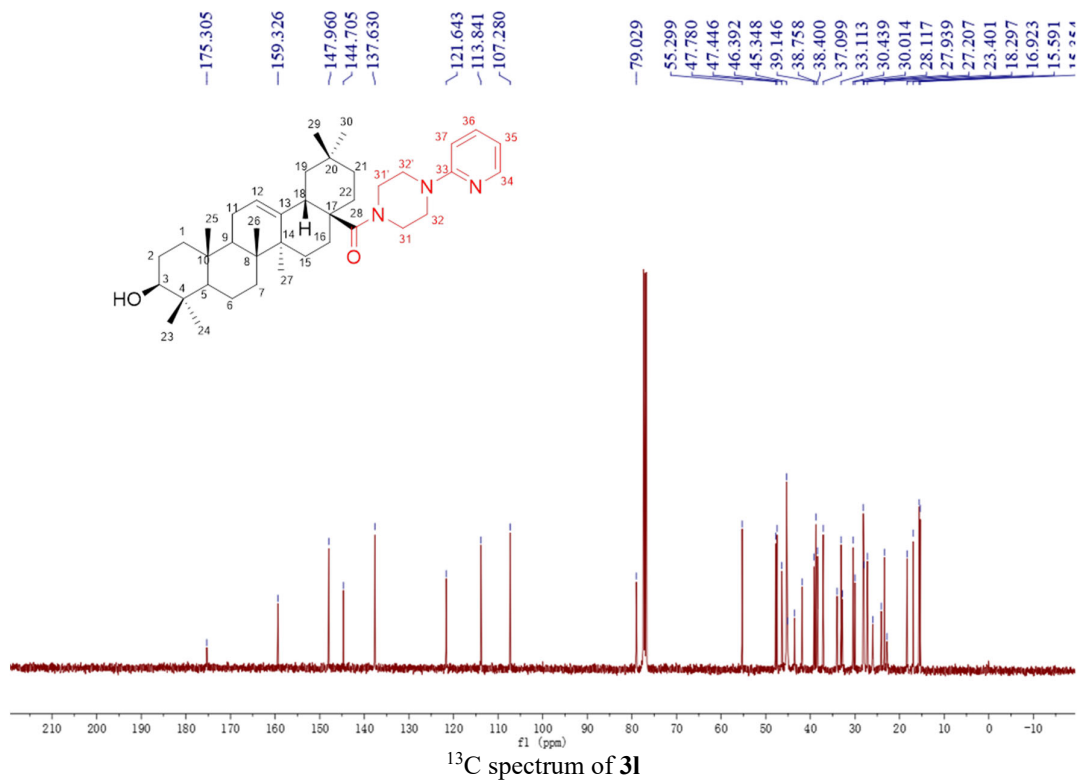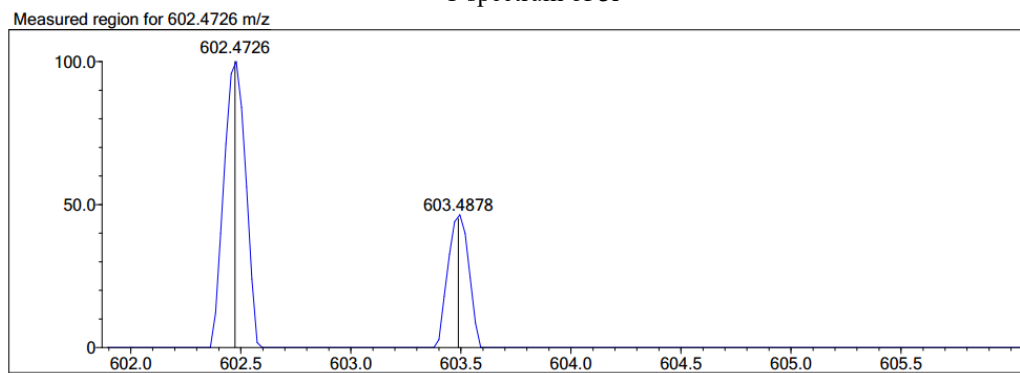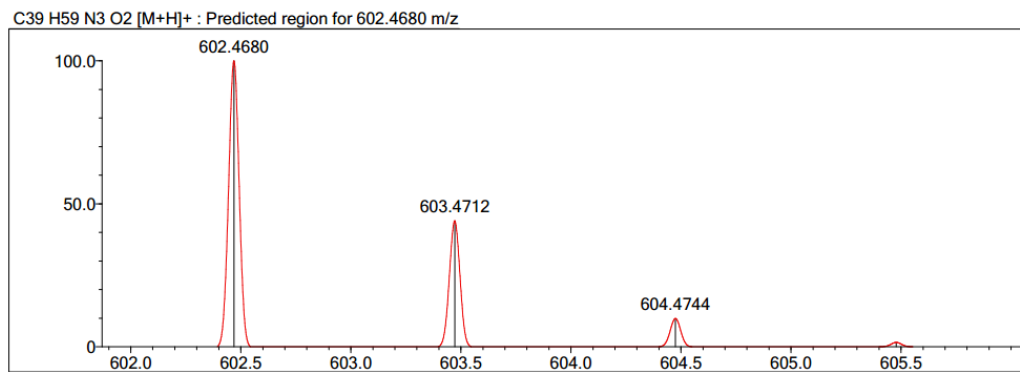

| Rank | Score | Formula (M)   | Ion                | Meas. m/z | Pred. m/z | Df. (mDa) | Df. (ppm) | Iso  | DBE  |
|------|-------|---------------|--------------------|-----------|-----------|-----------|-----------|------|------|
| 5    | 0.00  | C39 H59 N3 O2 | [M+H] <sup>+</sup> | 602.4726  | 602.4680  | 4.6       | 7.64      | 0.00 | 12.0 |

HRMS spectrum of 31

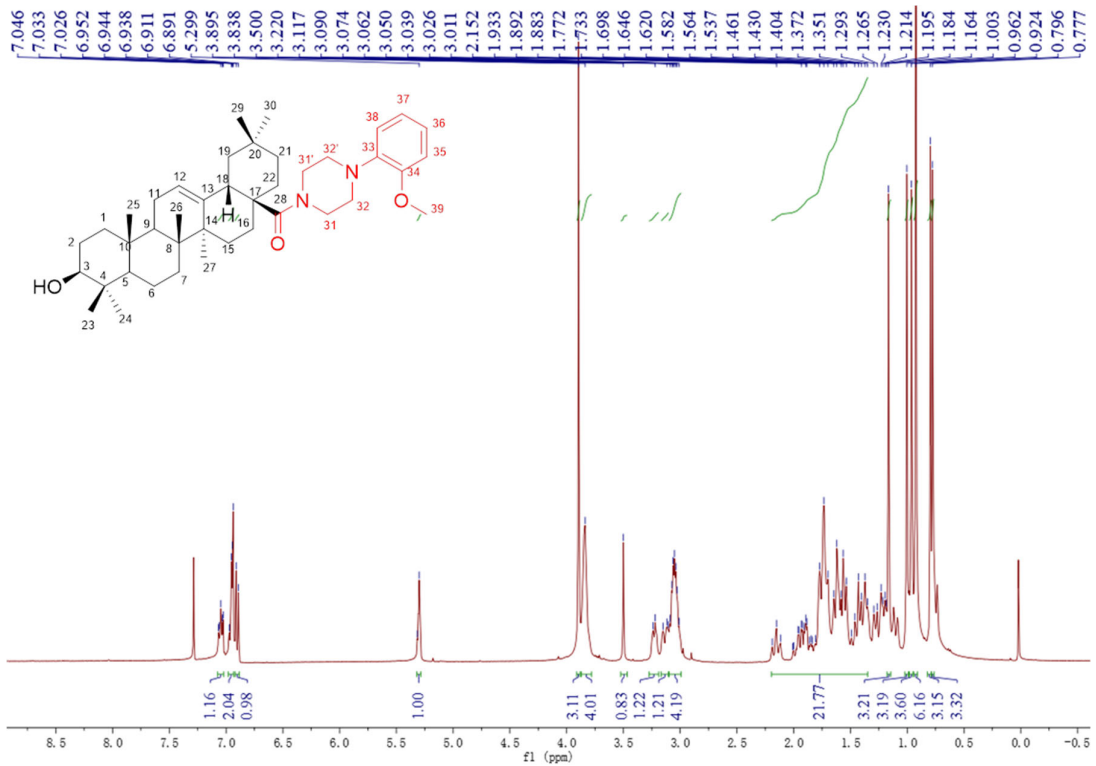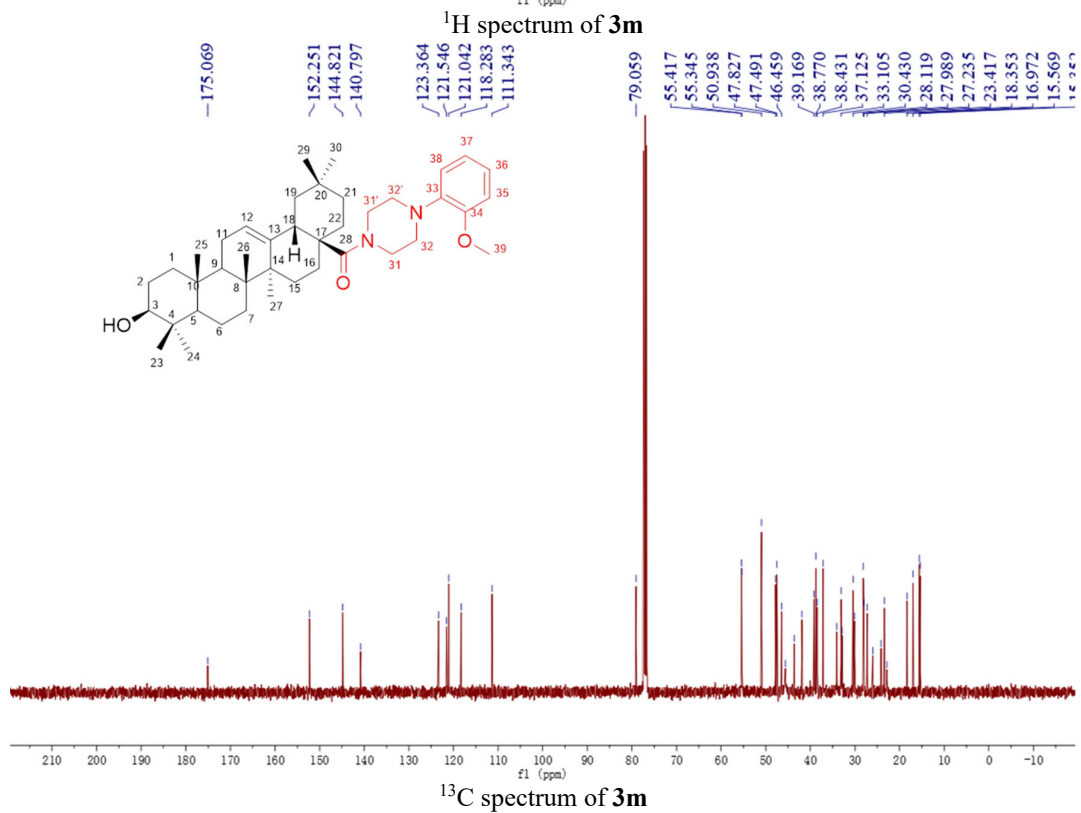

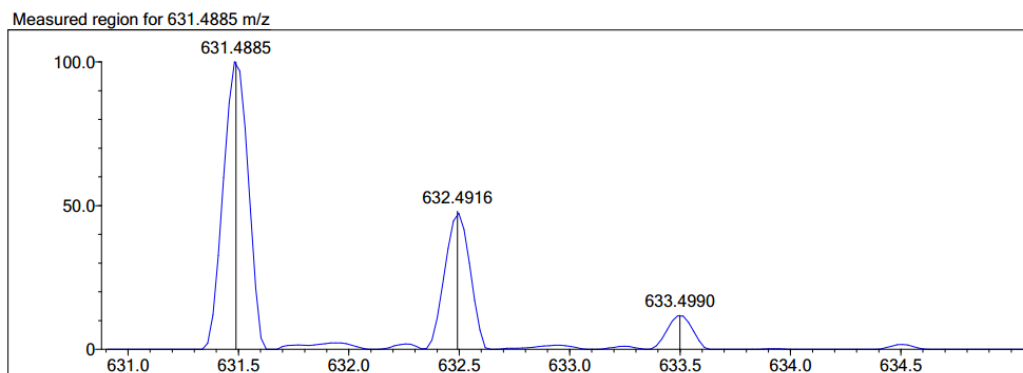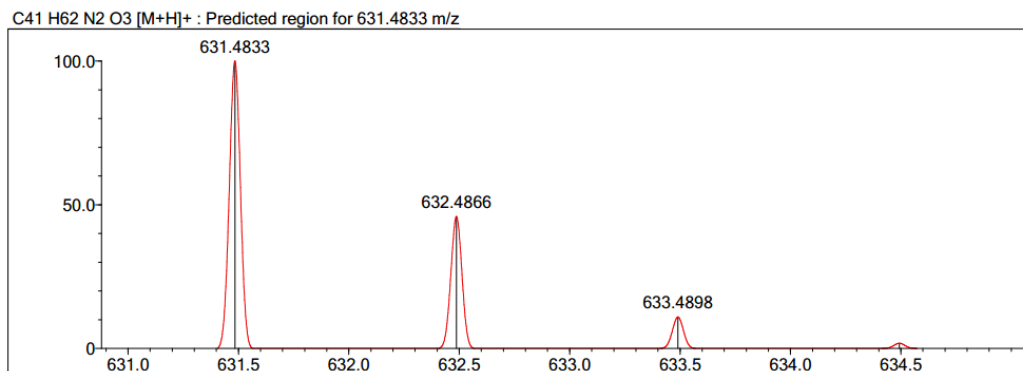

| Rank | Score | Formula (M)   | Ion                | Meas. m/z | Pred. m/z | Df. (mDa) | Df. (ppm) | Iso   | DBE  |
|------|-------|---------------|--------------------|-----------|-----------|-----------|-----------|-------|------|
| 5    | 51.18 | C41 H62 N2 O3 | [M+H] <sup>+</sup> | 631.4885  | 631.4833  | 5.2       | 8.23      | 88.70 | 12.0 |

HRMS spectrum of **3m**

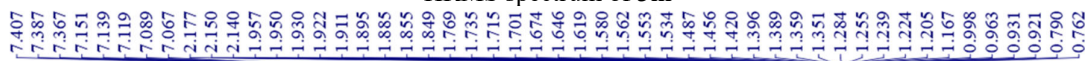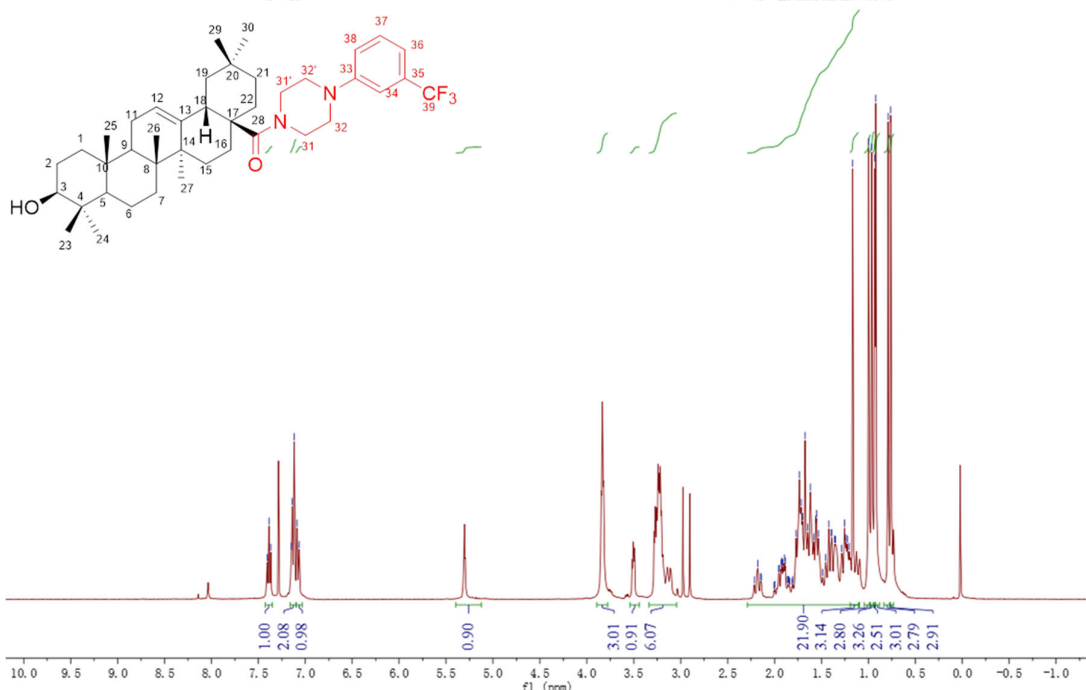

<sup>1</sup>H spectrum of **3n**

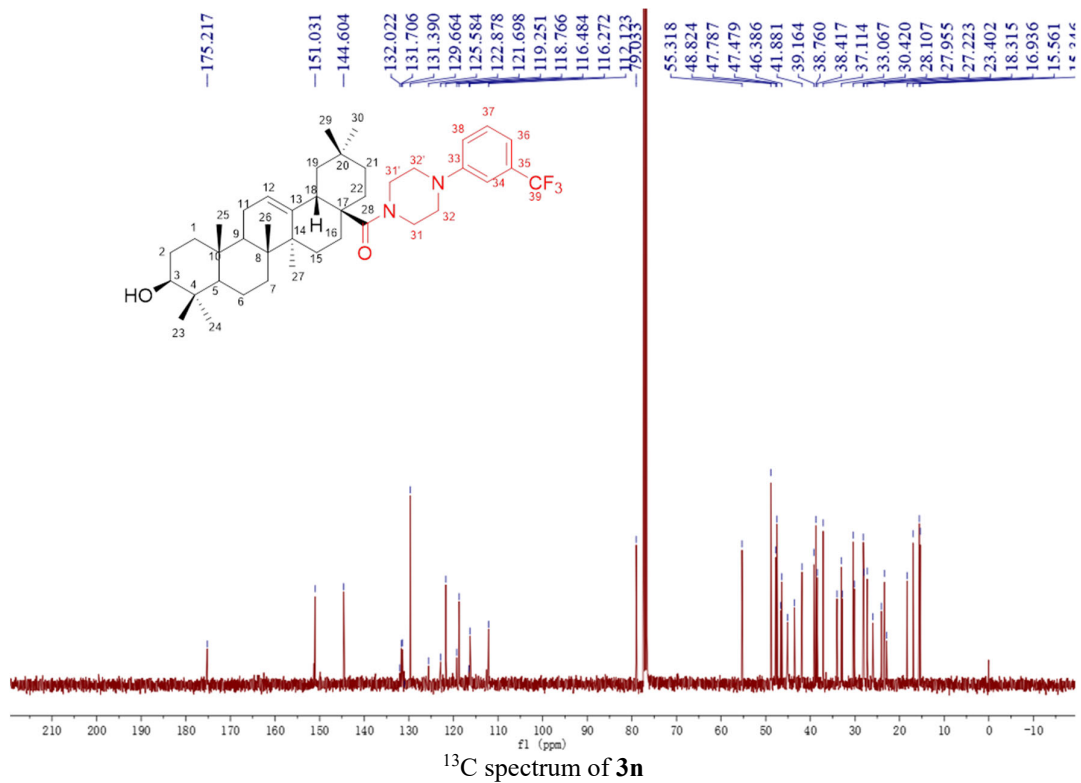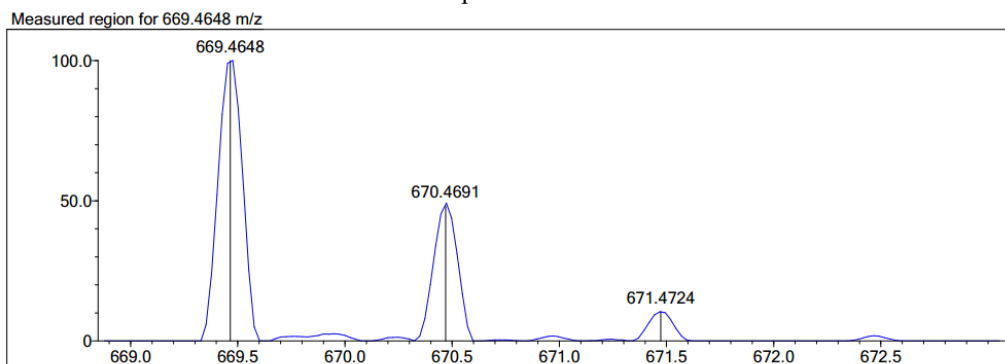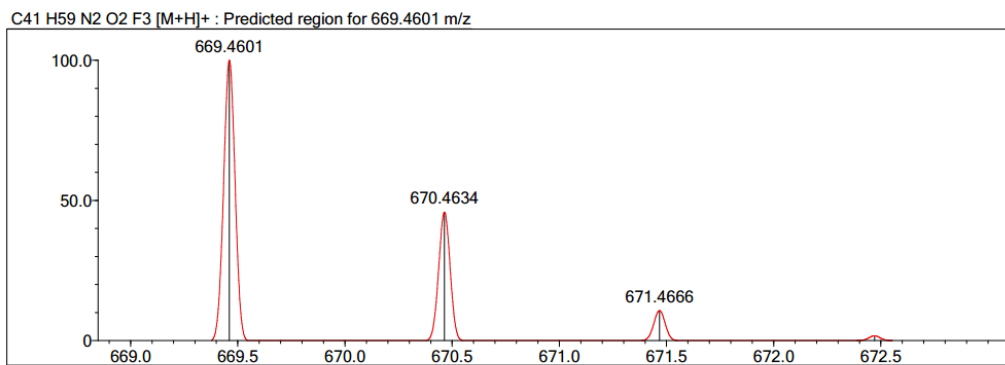

| Rank | Score | Formula (M)      | Ion                | Meas. m/z | Pred. m/z | Df. (mDa) | Df. (ppm) | Iso   | DBE  |
|------|-------|------------------|--------------------|-----------|-----------|-----------|-----------|-------|------|
| 15   | 65.37 | C41 H59 N2 O2 F3 | [M+H] <sup>+</sup> | 669.4648  | 669.4601  | 4.7       | 7.02      | 93.65 | 12.0 |

HRMS spectrum of 3n



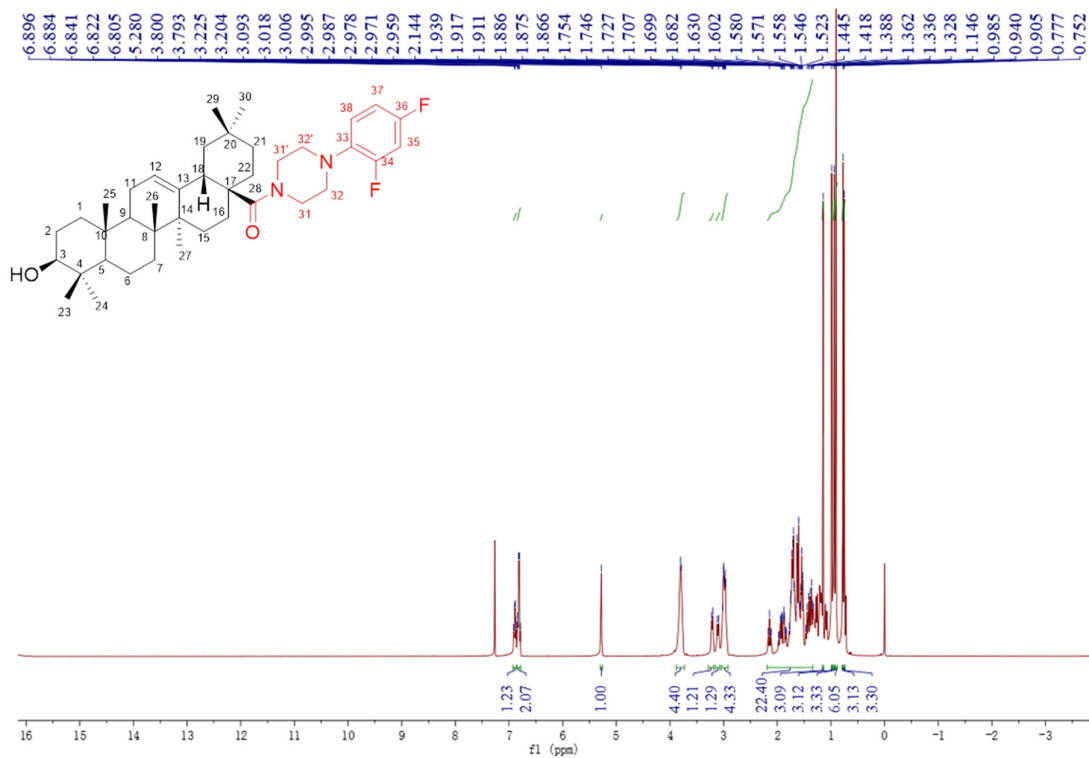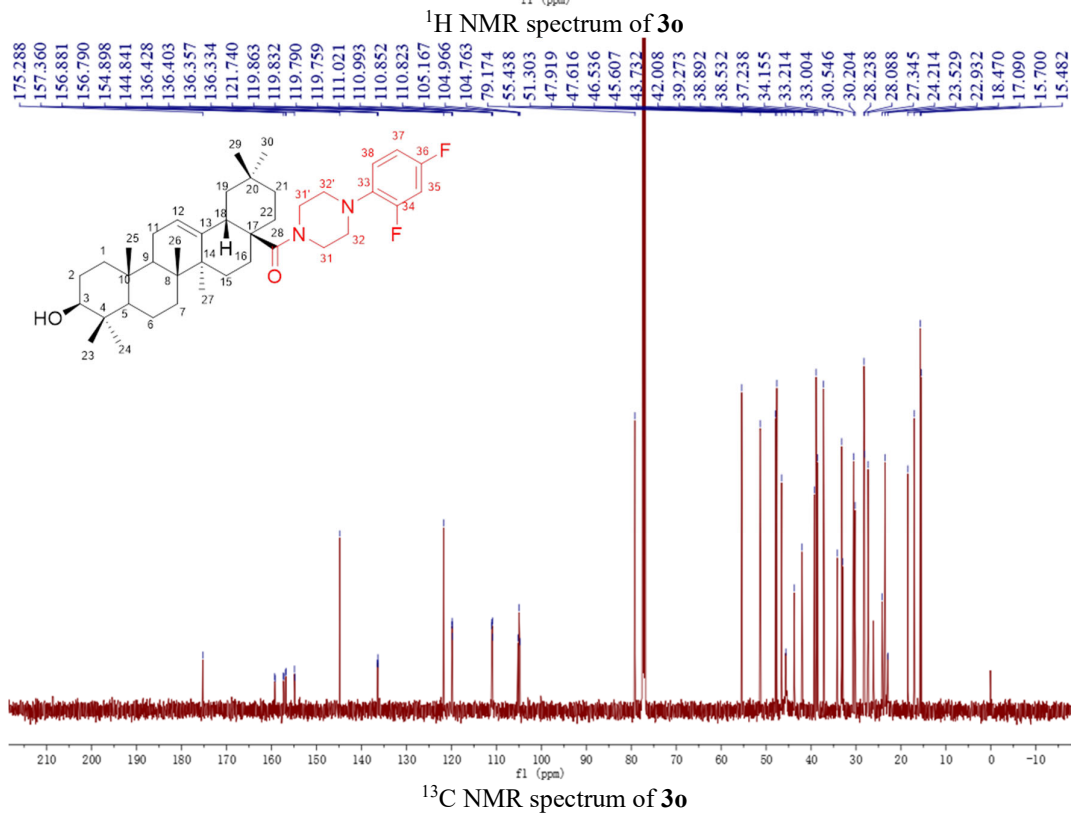

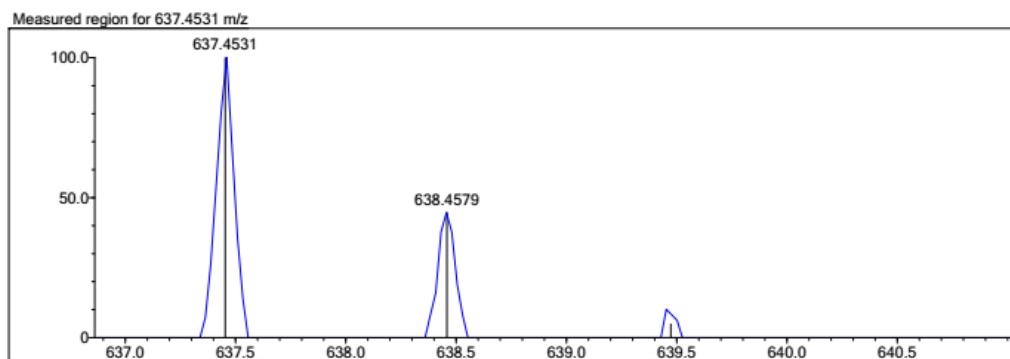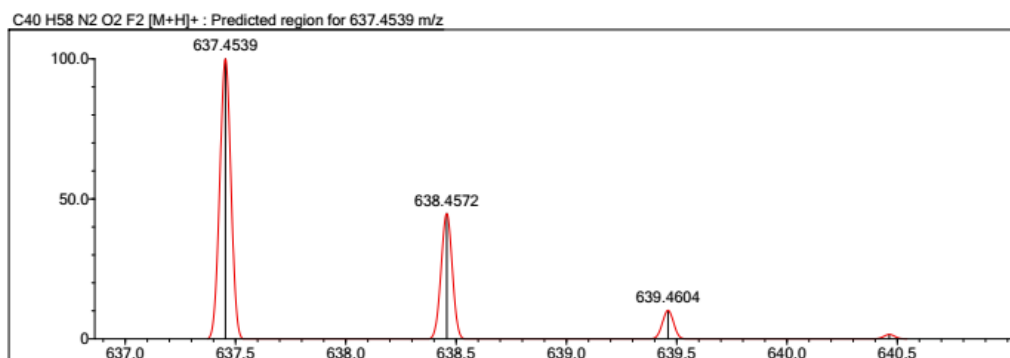

| Rank | Score | Formula (M)      | Ion                | Meas. m/z | Pred. m/z | Df. (mDa) | Df. (ppm) | Iao   | DBE  |
|------|-------|------------------|--------------------|-----------|-----------|-----------|-----------|-------|------|
| 3    | 68.96 | C40 H58 N2 O2 F2 | [M+H] <sup>+</sup> | 637.4531  | 637.4539  | -0.8      | -1.25     | 69.39 | 12.0 |

HRMS spectrum of **3o**

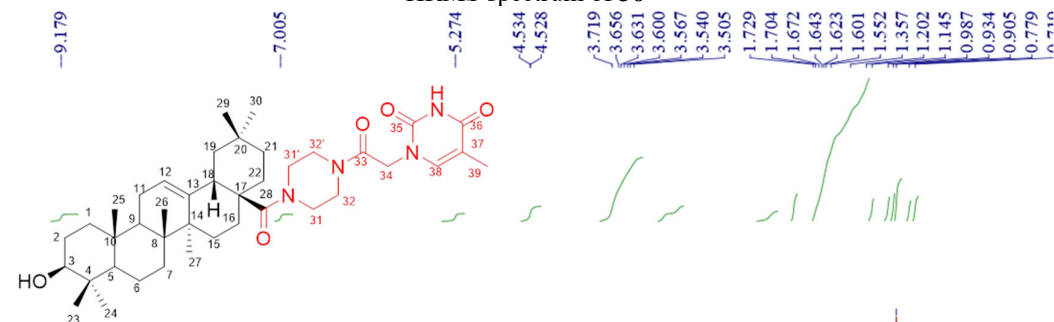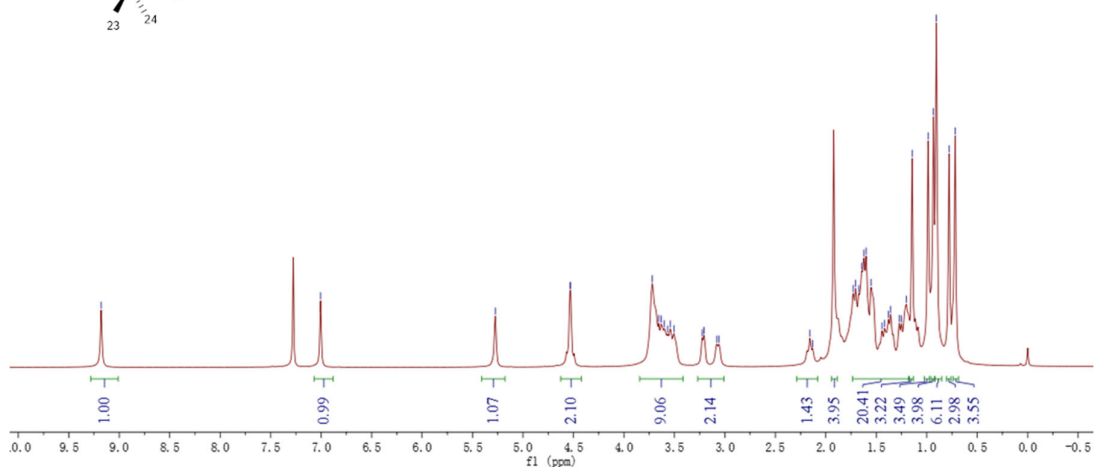

<sup>1</sup>H spectrum of **3p**

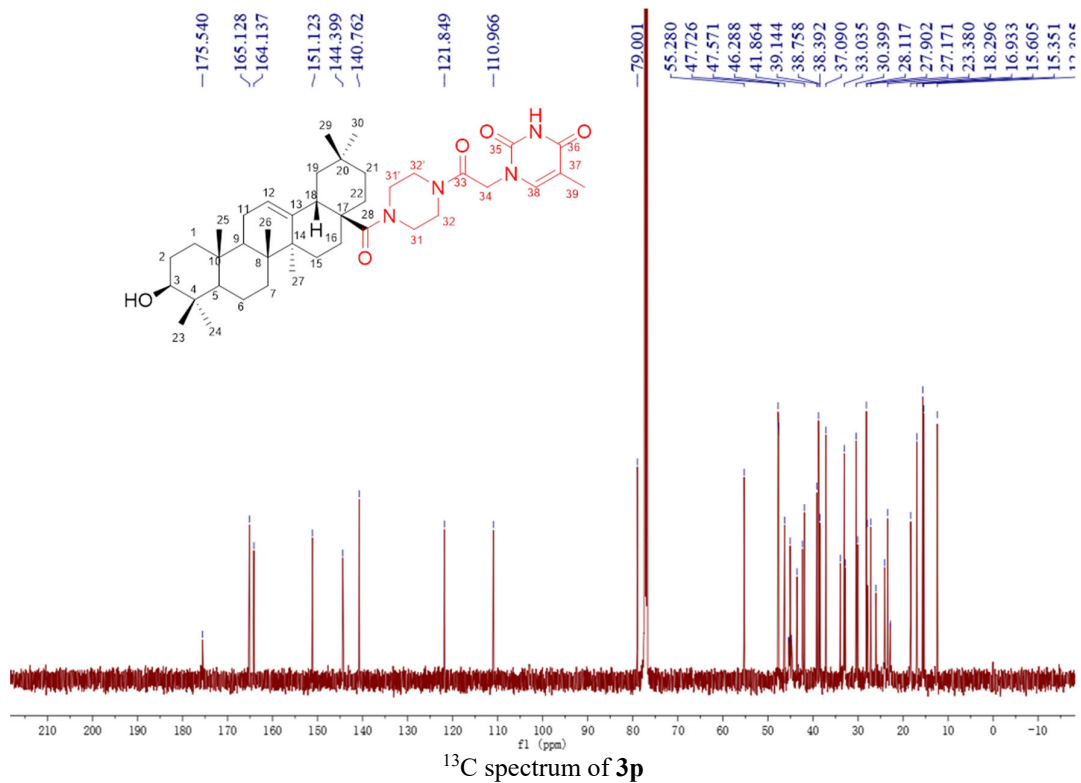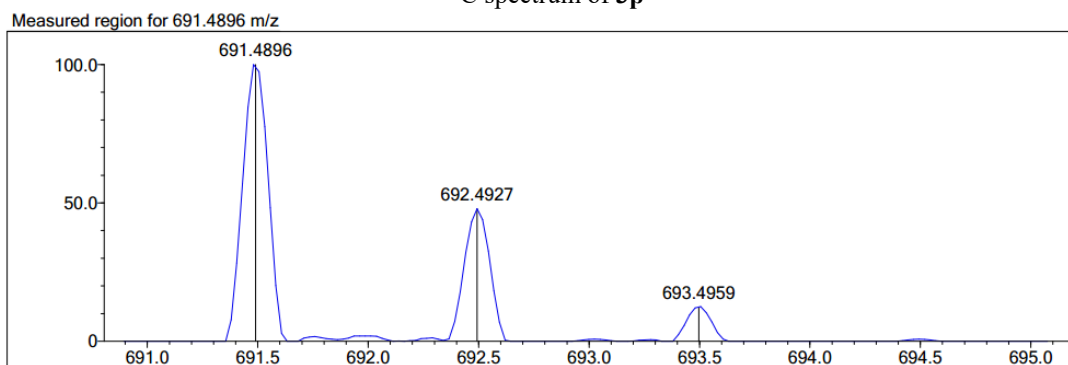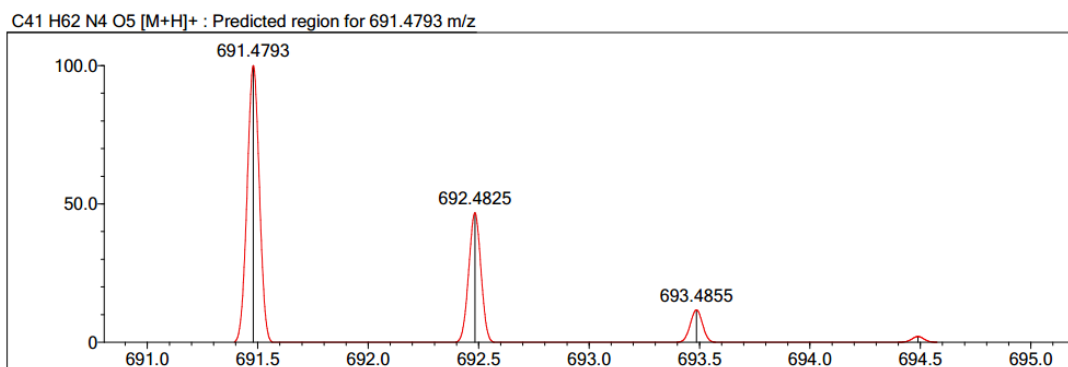

| Rank | Score | Formula (M)                                                   | Ion                | Meas. m/z | Pred. m/z | Df. (mDa) | Df. (ppm) | Iso   | DBE  |
|------|-------|---------------------------------------------------------------|--------------------|-----------|-----------|-----------|-----------|-------|------|
| 12   | 23.85 | C <sub>41</sub> H <sub>62</sub> N <sub>4</sub> O <sub>5</sub> | [M+H] <sup>+</sup> | 691.4896  | 691.4793  | 10.3      | 14.90     | 88.53 | 13.0 |

HRMS spectrum of 3p

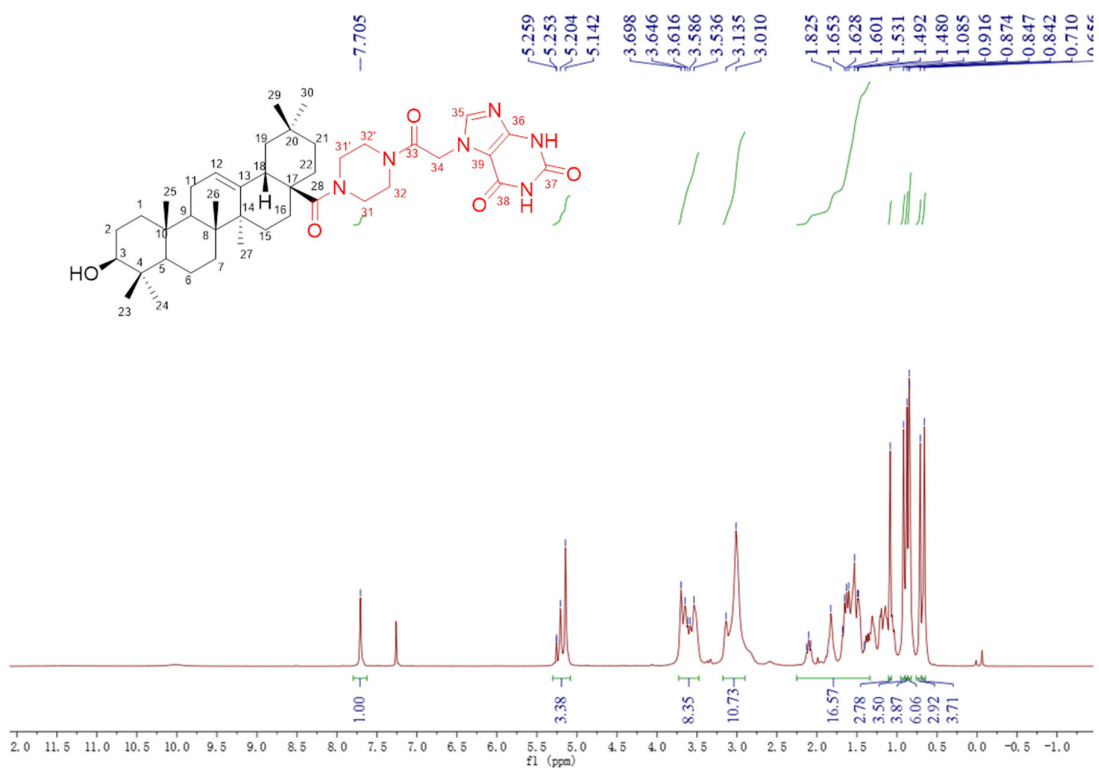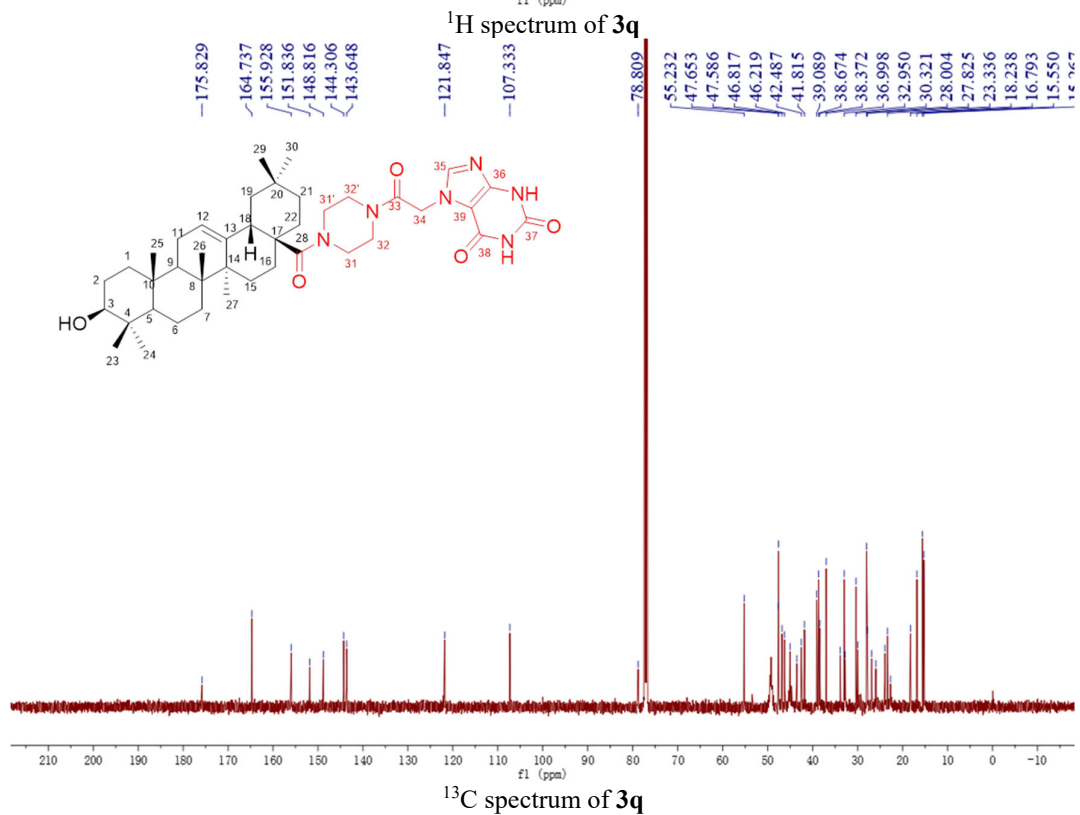

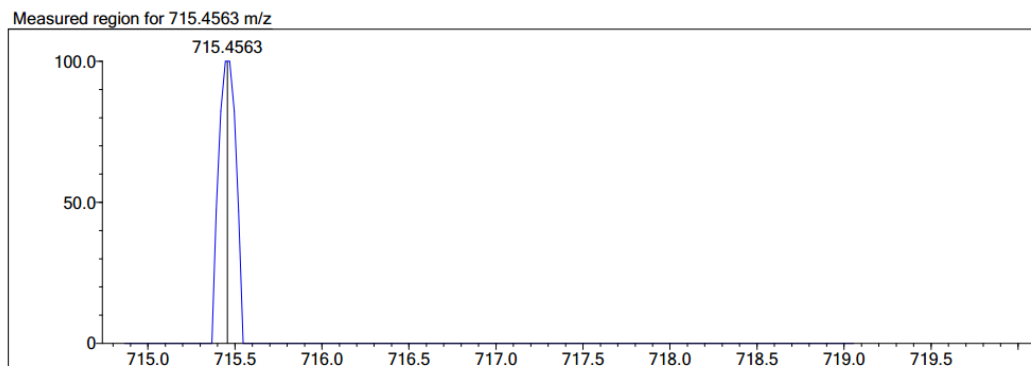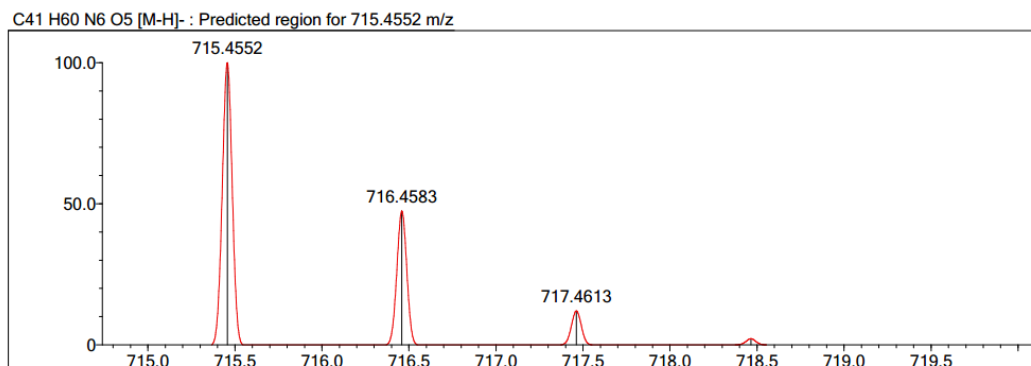

| Rank | Score | Formula (M)   | Ion                | Meas. m/z | Pred. m/z | Df. (mDa) | Df. (ppm) | Iso  | DBE  |
|------|-------|---------------|--------------------|-----------|-----------|-----------|-----------|------|------|
| 7    | 0.00  | C41 H60 N6 O5 | [M-H] <sup>-</sup> | 715.4563  | 715.4552  | 1.1       | 1.54      | 0.00 | 15.0 |

HRMS spectrum of **3q**

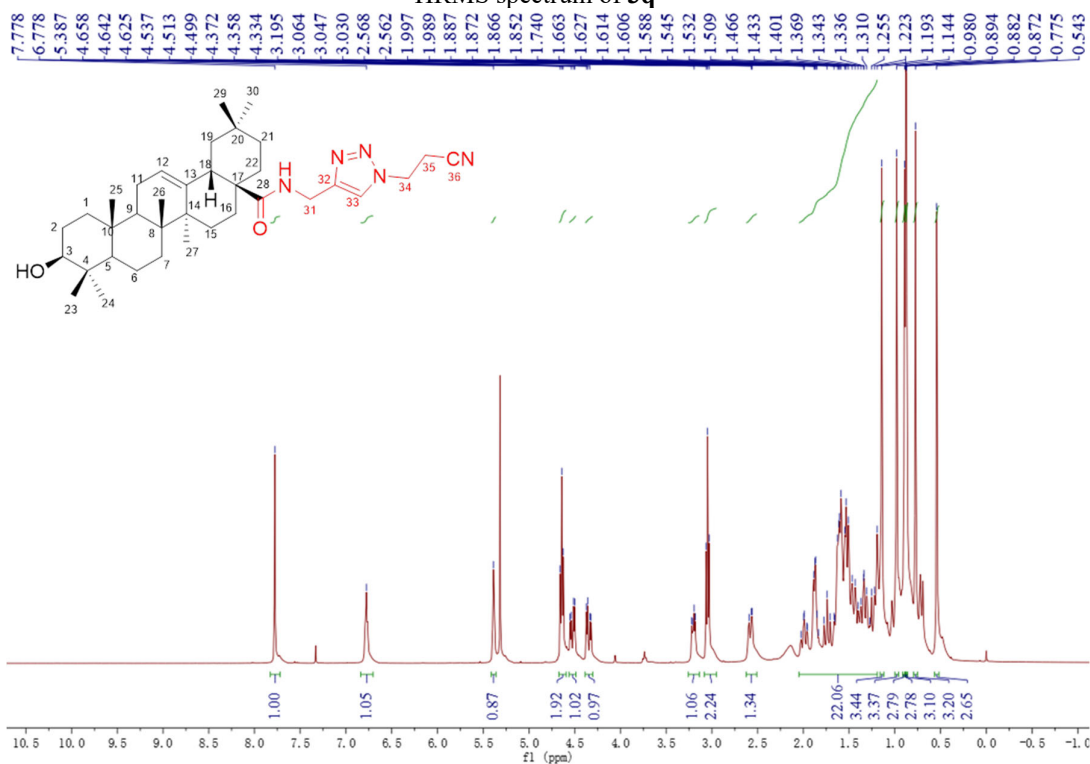

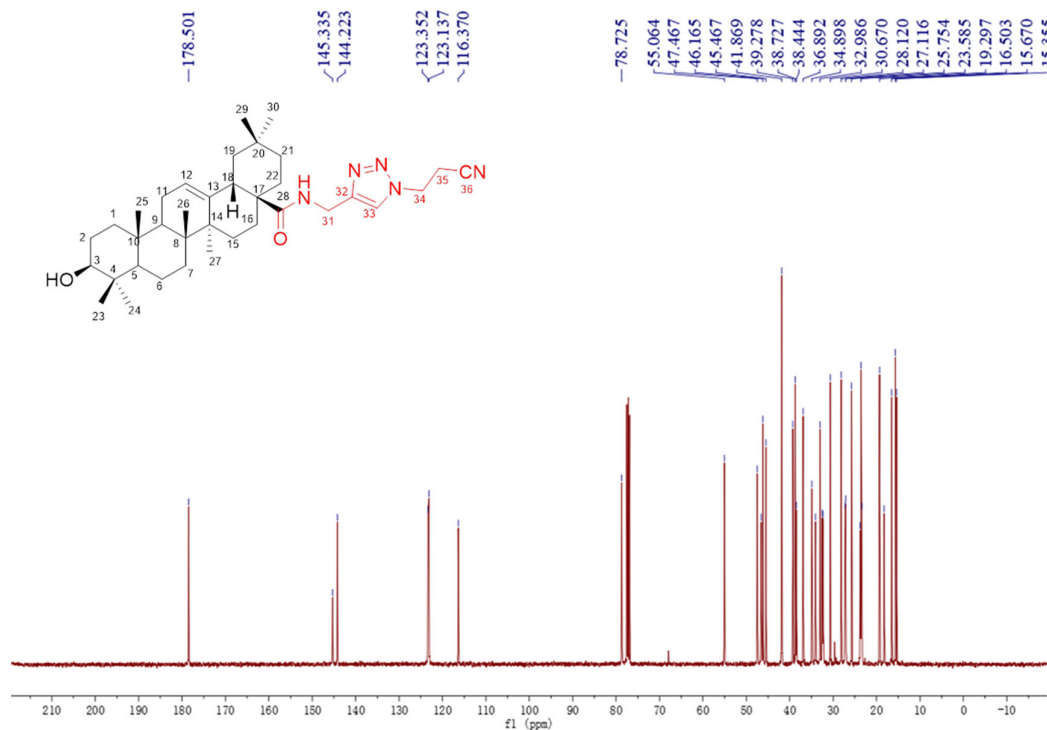

<sup>13</sup>C NMR spectrum of **4a**

Measured region for 590.4419 m/z

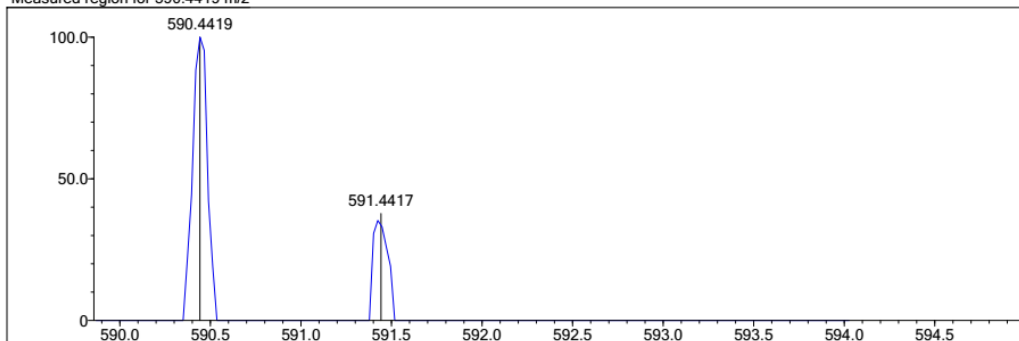

C36 H55 N5 O2 [M+H]<sup>+</sup> : Predicted region for 590.4429 m/z

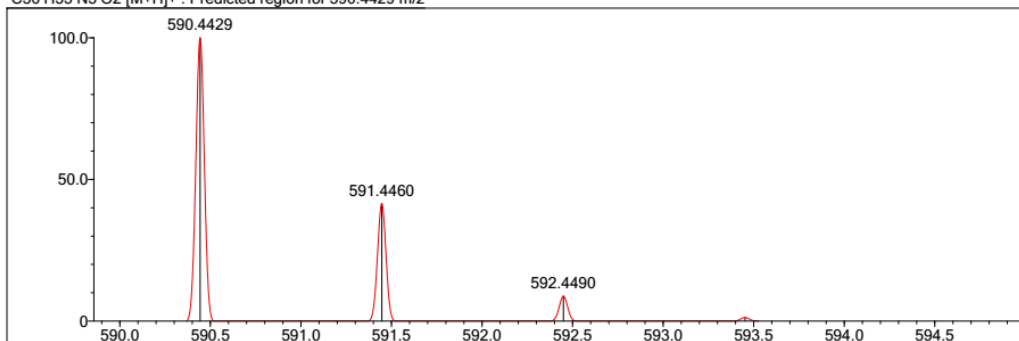

| Rank | Score | Formula (M)   | Ion                | Meas. m/z | Pred. m/z | Df. (mDa) | Df. (ppm) | Iso  | DBE  |
|------|-------|---------------|--------------------|-----------|-----------|-----------|-----------|------|------|
| 6    | 0.00  | C36 H55 N5 O2 | [M+H] <sup>+</sup> | 590.4419  | 590.4429  | -1.0      | -1.69     | 0.00 | 12.0 |

HRMS spectrum of **4a**

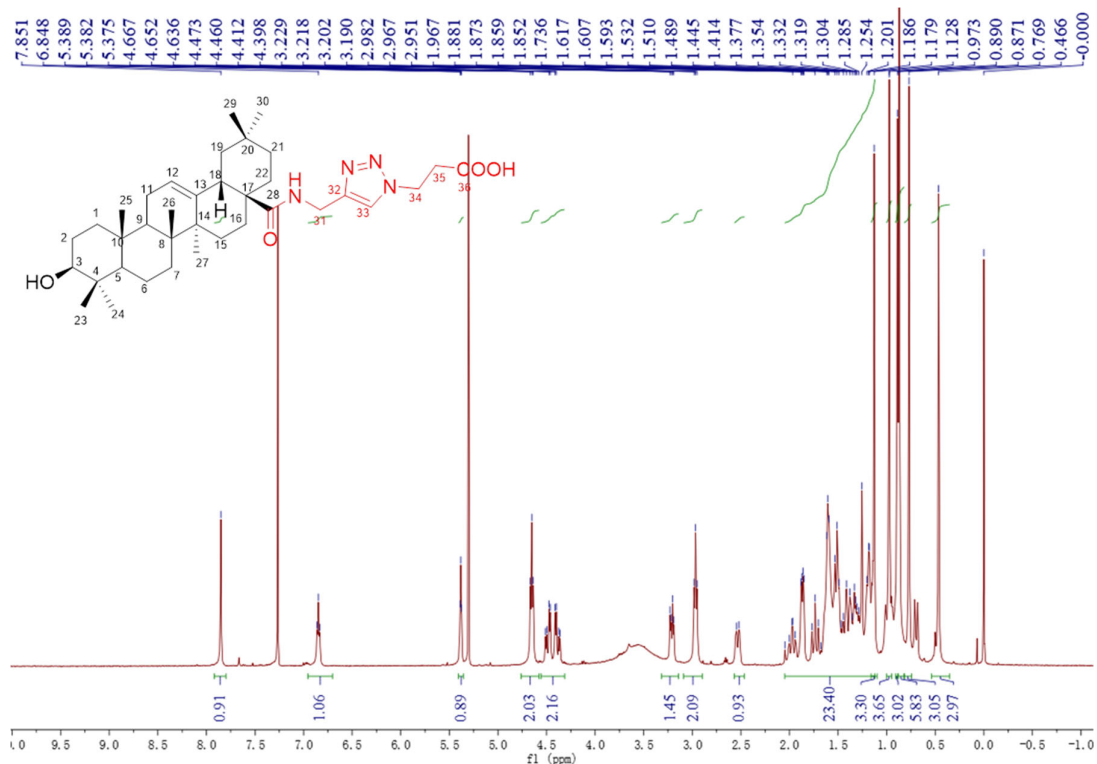

<sup>1</sup>H NMR spectrum of 4b

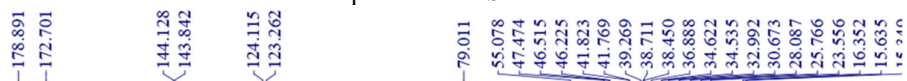

<sup>13</sup>C NMR spectrum of 4b

Measured region for 609.4369 m/z

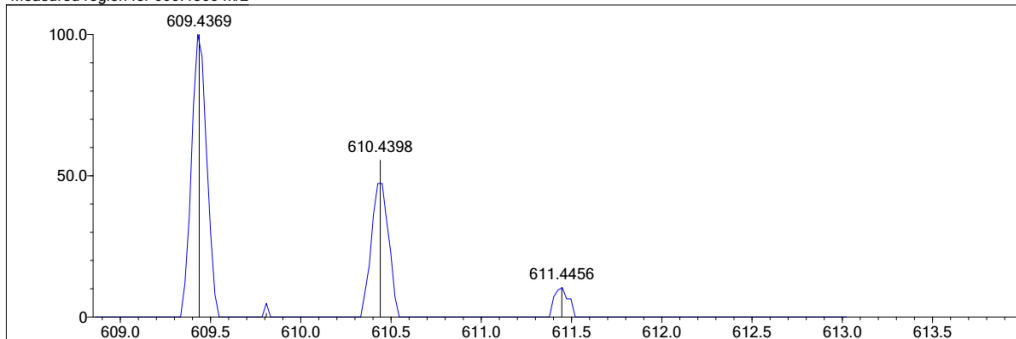

C36 H56 N4 O4 [M+H]<sup>+</sup> : Predicted region for 609.4374 m/z

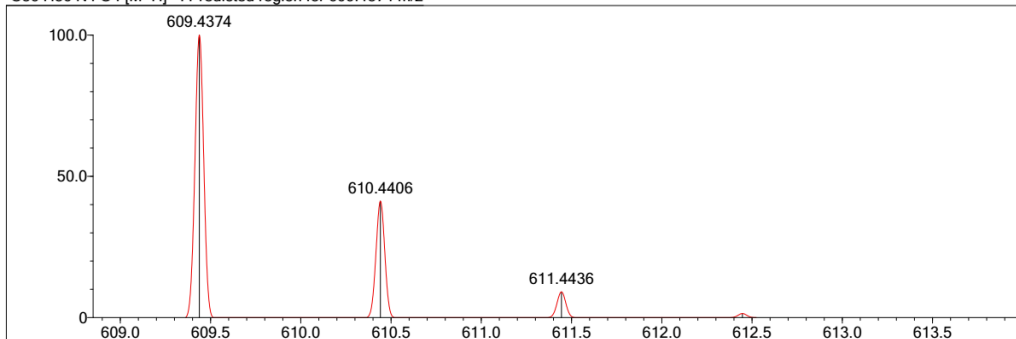

| Rank | Score | Formula (M)   | Ion                | Meas. m/z | Pred. m/z | Df. (mDa) | Df. (ppm) | Iso   | DBE  |
|------|-------|---------------|--------------------|-----------|-----------|-----------|-----------|-------|------|
| 2    | 80.13 | C36 H56 N4 O4 | [M+H] <sup>+</sup> | 609.4369  | 609.4374  | -0.5      | -0.82     | 80.13 | 11.0 |

HRMS spectrum of **4b**

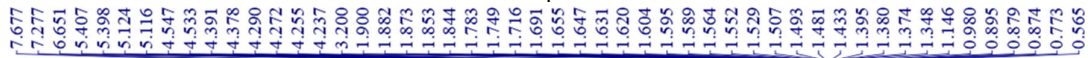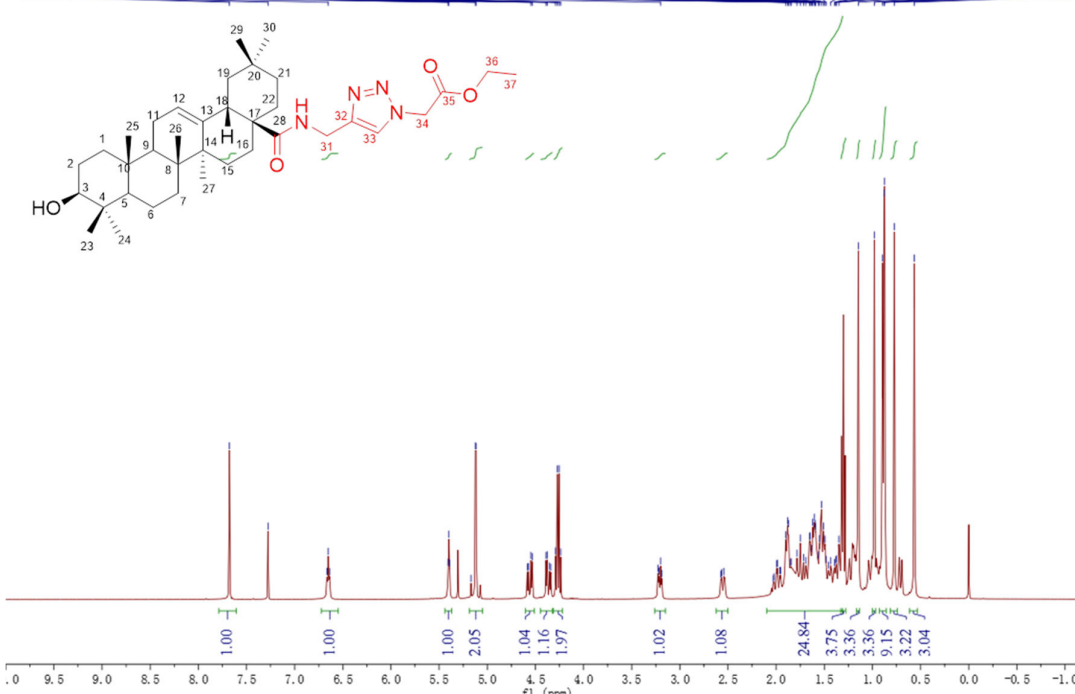

<sup>1</sup>H spectrum of **4c**



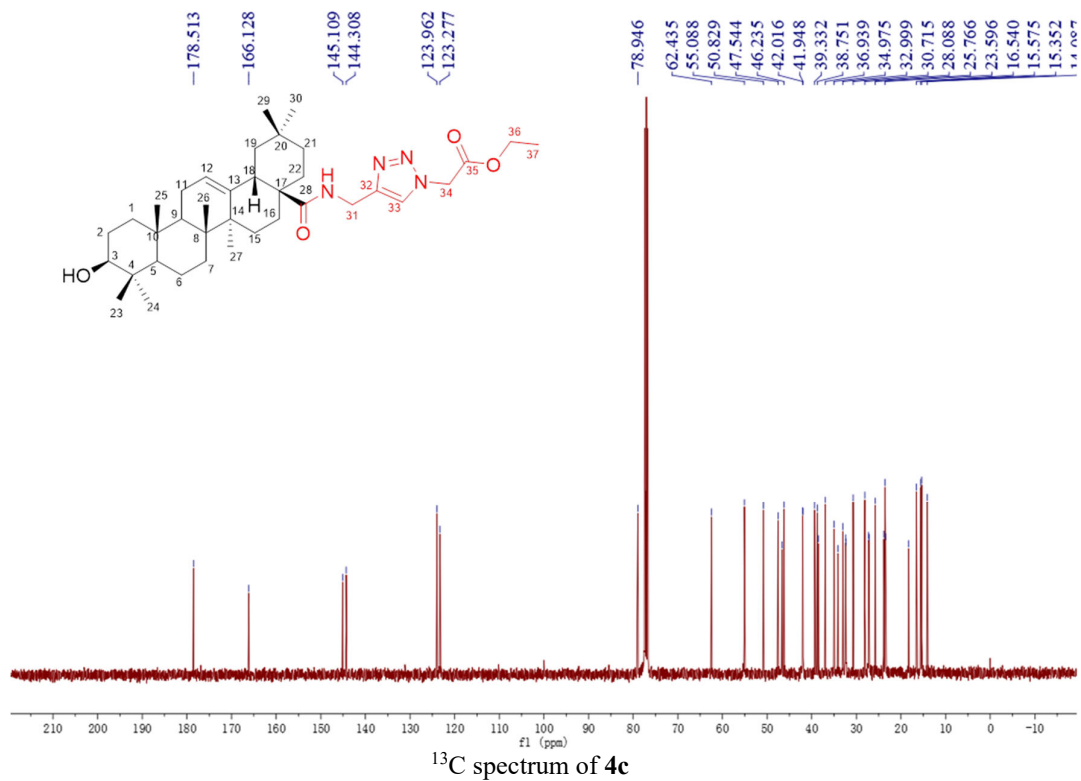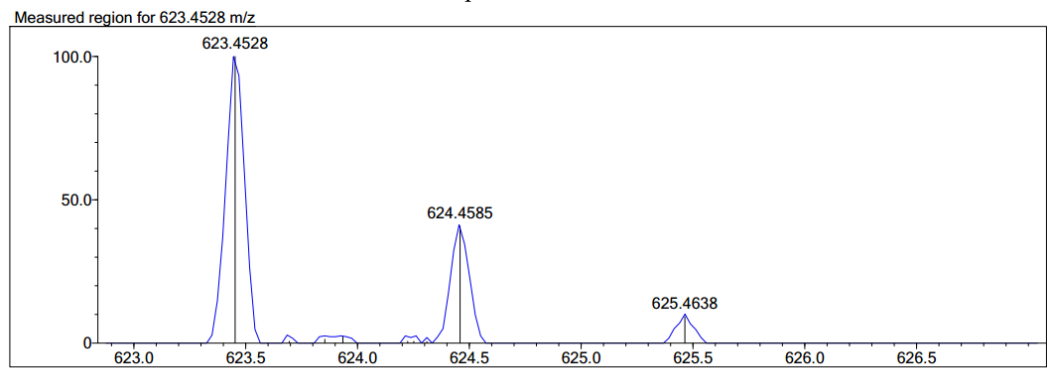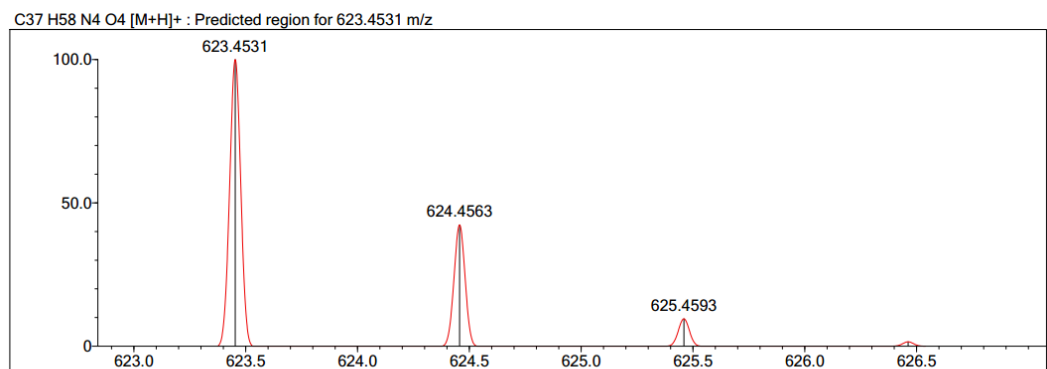

| Rank | Score  | Formula (M)   | Ion                | Meas. m/z | Pred. m/z | Df. (mDa) | Df. (ppm) | Iso    | DBE  |
|------|--------|---------------|--------------------|-----------|-----------|-----------|-----------|--------|------|
| 1    | 100.00 | C37 H58 N4 O4 | [M+H] <sup>+</sup> | 623.4528  | 623.4531  | -0.3      | -0.48     | 100.00 | 11.0 |

HRMS spectrum of 4c

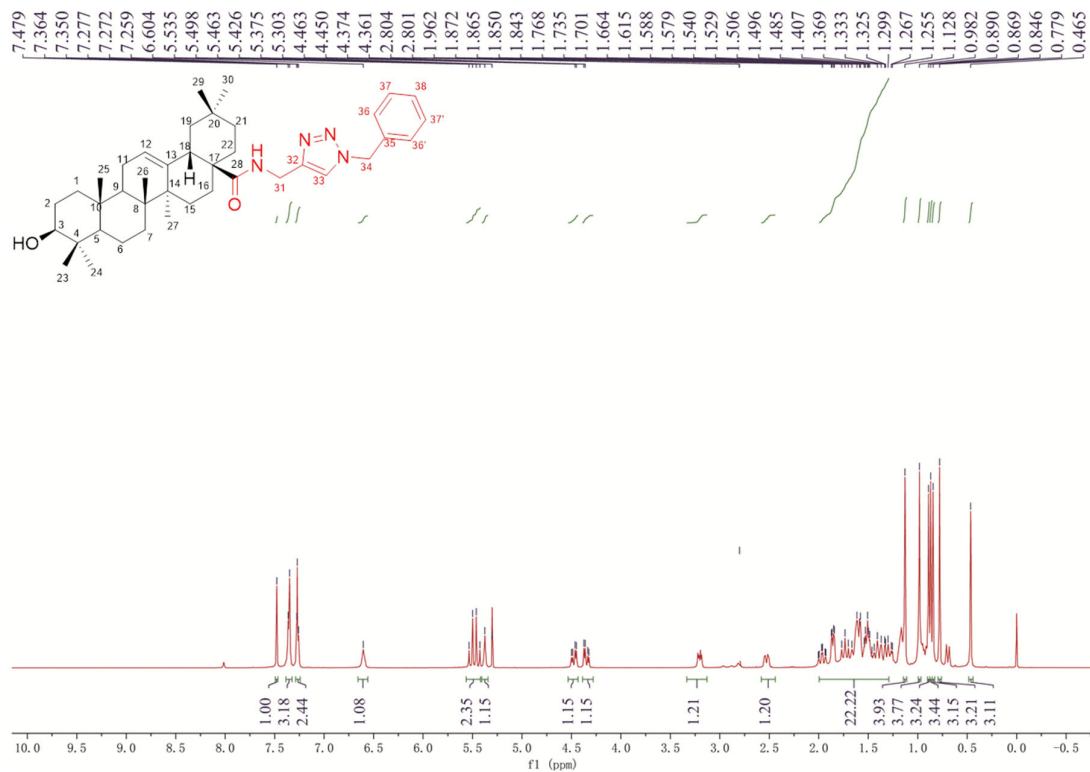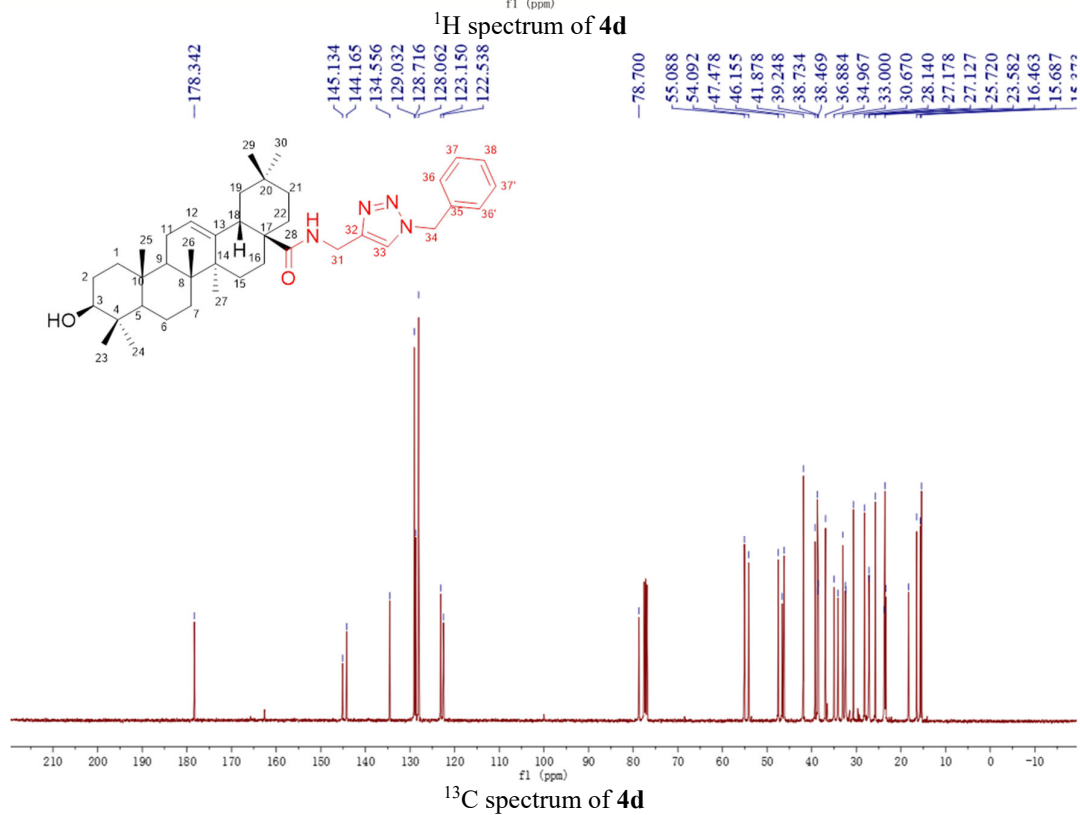

Measured region for 627.4640 m/z

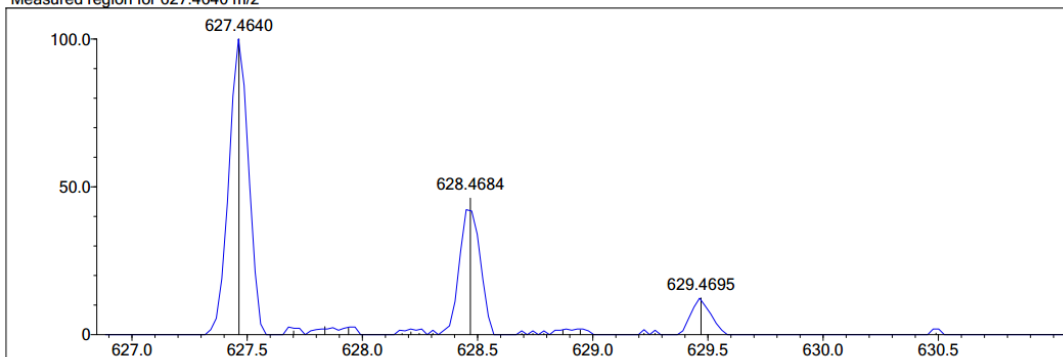

C40 H58 N4 O2 [M+H]<sup>+</sup> : Predicted region for 627.4633 m/z

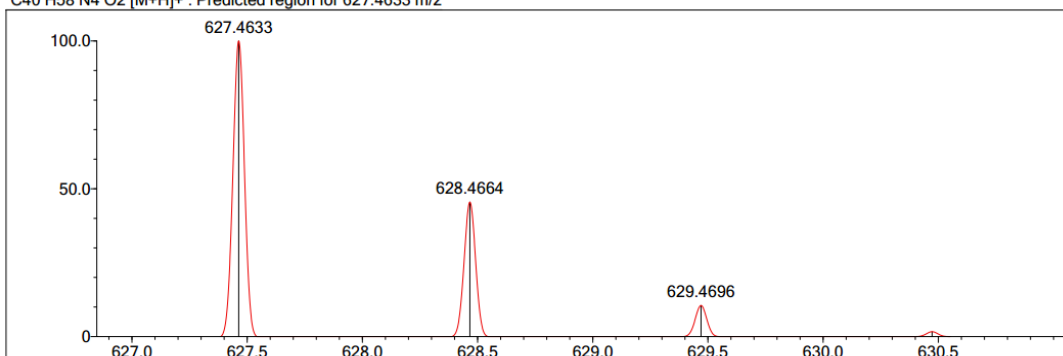

| Rank | Score | Formula (M)   | Ion                | Meas. m/z | Pred. m/z | Df. (mDa) | Df. (ppm) | Iso   | DBE  |
|------|-------|---------------|--------------------|-----------|-----------|-----------|-----------|-------|------|
| 1    | 76.46 | C40 H58 N4 O2 | [M+H] <sup>+</sup> | 627.4640  | 627.4633  | 0.7       | 1.12      | 76.69 | 14.0 |

HRMS spectrum of 4d

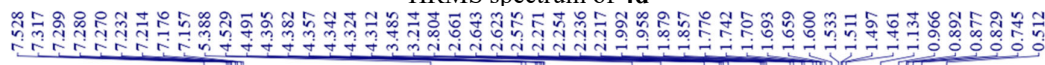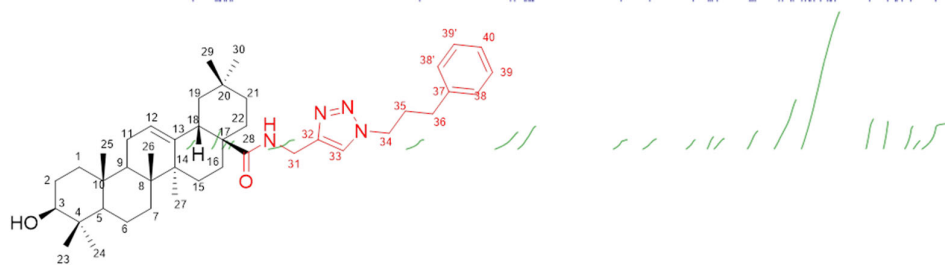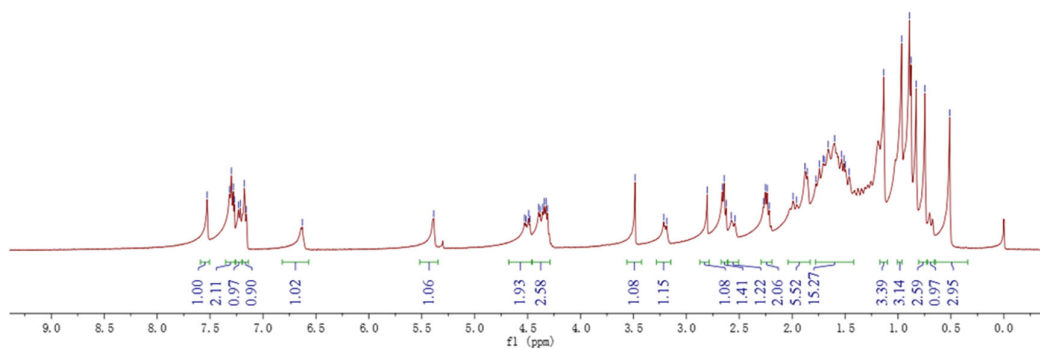

<sup>1</sup>H NMR spectrum of 4e

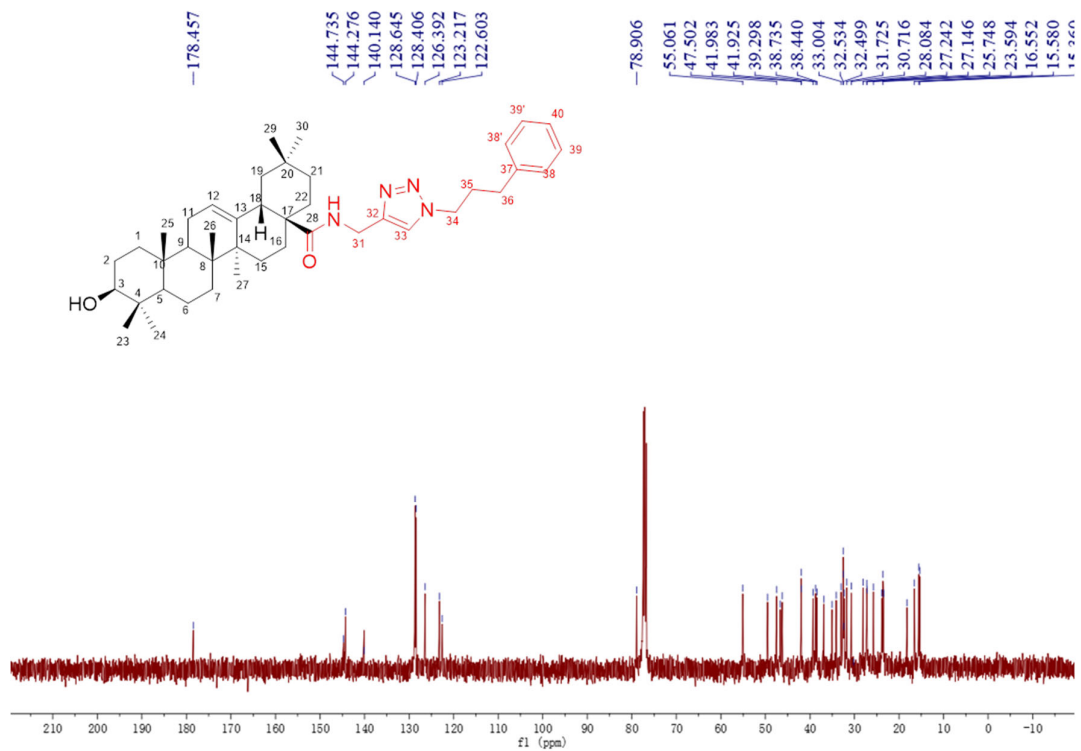

$^{13}\text{C}$  NMR spectrum of **4e**

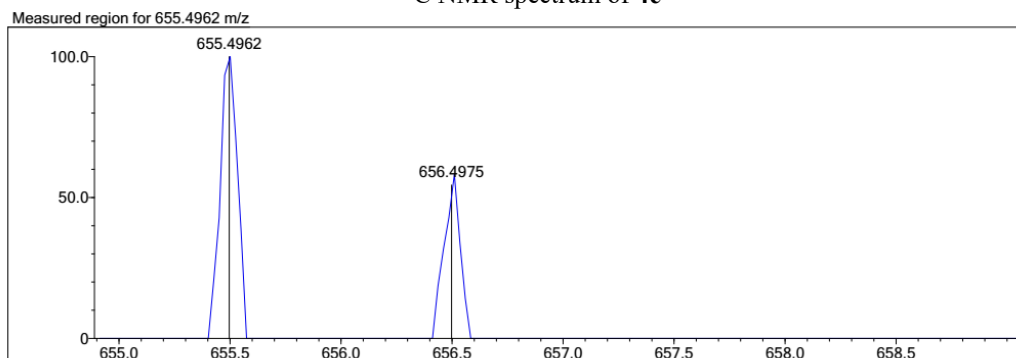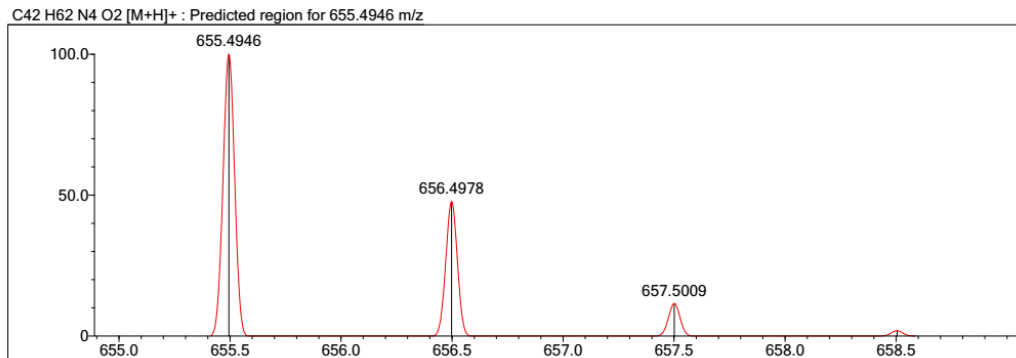

| Rank | Score | Formula (M)   | Ion                | Meas. m/z | Pred. m/z | Df. (mDa) | Df. (ppm) | Iso  | DBE  |
|------|-------|---------------|--------------------|-----------|-----------|-----------|-----------|------|------|
| 2    | 0.00  | C42 H62 N4 O2 | [M+H] <sup>+</sup> | 655.4962  | 655.4946  | 1.6       | 2.44      | 0.00 | 14.0 |

HRMS spectrum of **4e**

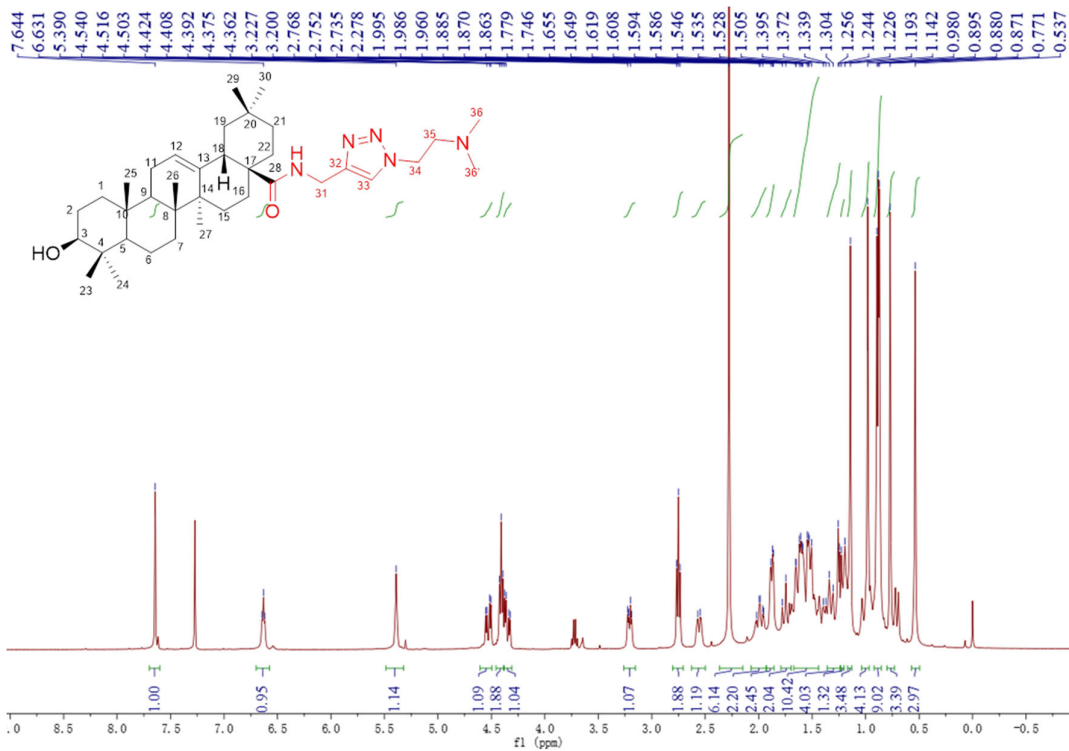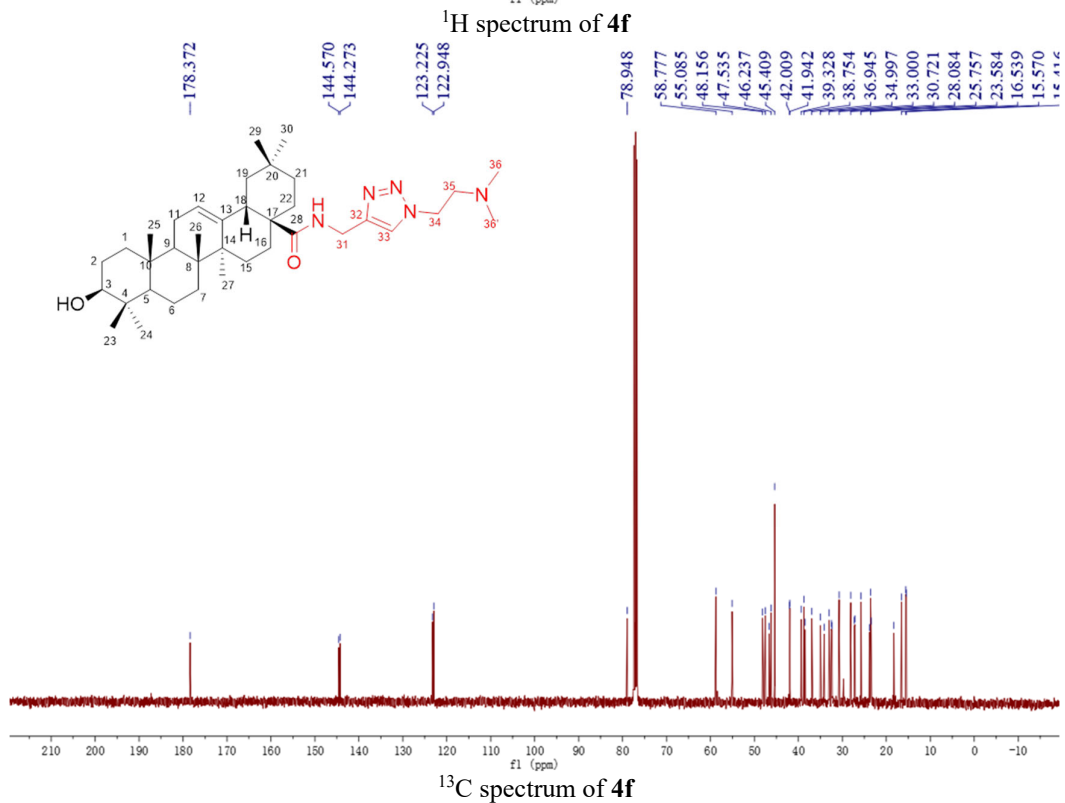

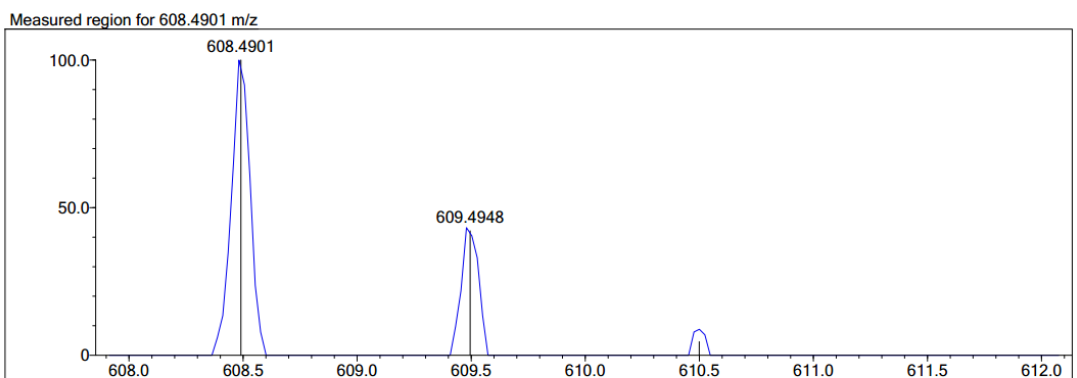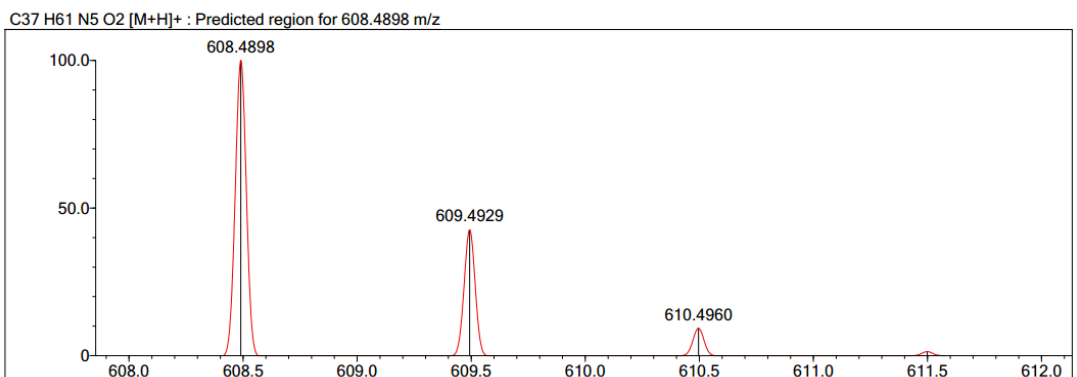

| Rank | Score | Formula (M)   | Ion                | Meas. m/z | Pred. m/z | Df. (mDa) | Df. (ppm) | Iso   | DBE  |
|------|-------|---------------|--------------------|-----------|-----------|-----------|-----------|-------|------|
| 1    | 97.27 | C37 H61 N5 O2 | [M+H] <sup>+</sup> | 608.4901  | 608.4898  | 0.3       | 0.49      | 97.27 | 10.0 |

HRMS spectrum of 4f

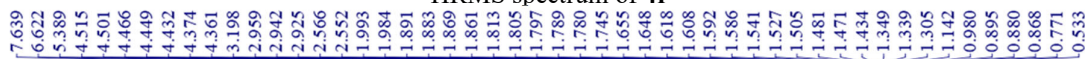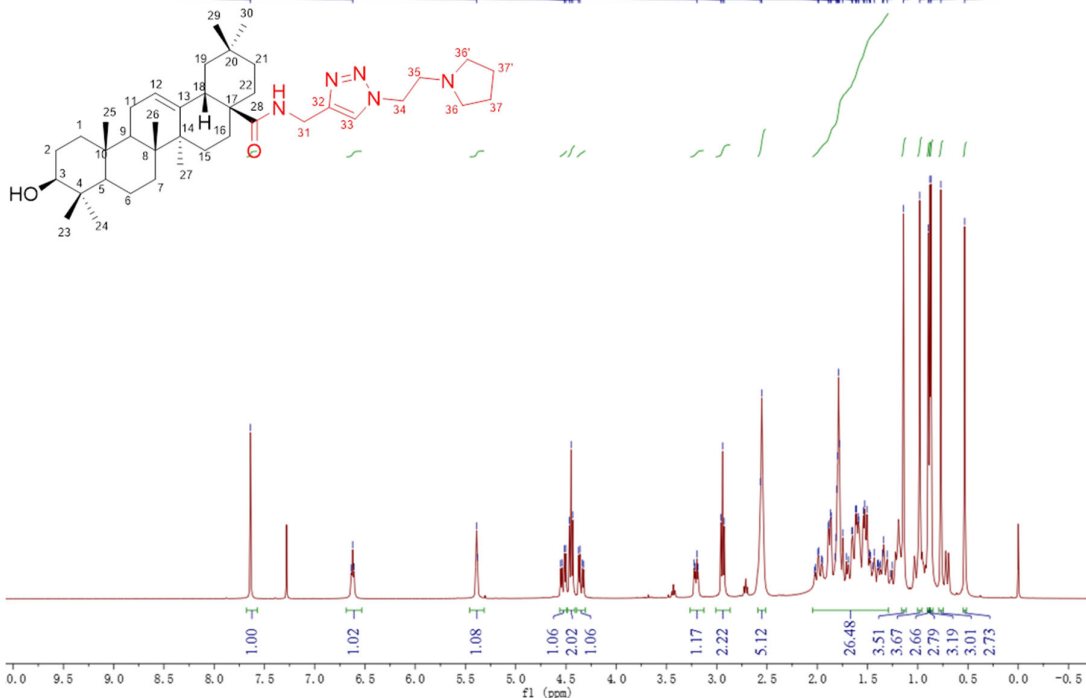

<sup>1</sup>H spectrum of 4g

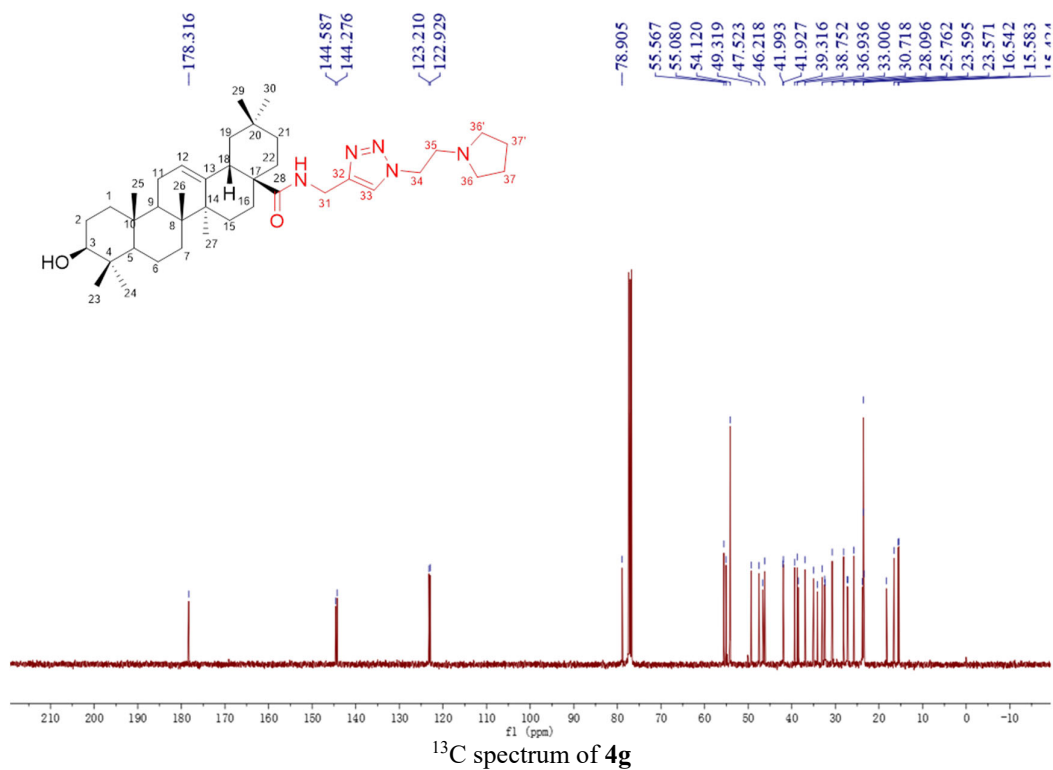

Measured region for 634.5058 m/z

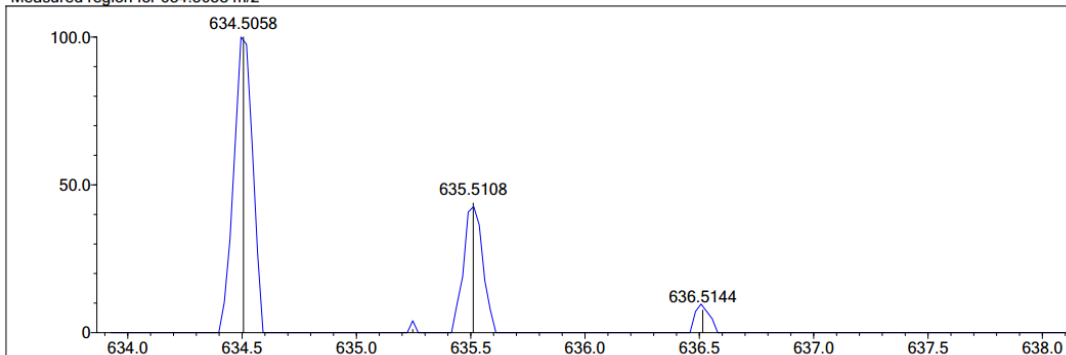

C39 H63 N5 O2 [M+H]<sup>+</sup> : Predicted region for 634.5055 m/z

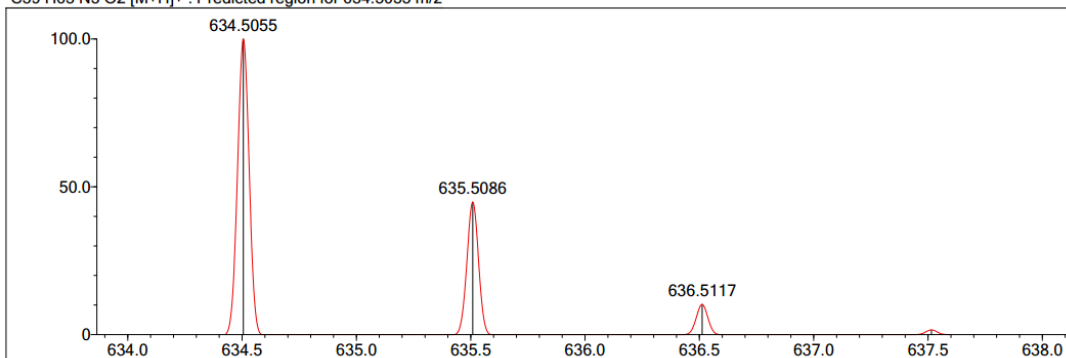

| Rank | Score | Formula (M)   | Ion                | Meas. m/z | Pred. m/z | Df. (mDa) | Df. (ppm) | Iso   | DBE  |
|------|-------|---------------|--------------------|-----------|-----------|-----------|-----------|-------|------|
| 1    | 98.60 | C39 H63 N5 O2 | [M+H] <sup>+</sup> | 634.5058  | 634.5055  | 0.3       | 0.47      | 98.60 | 11.0 |

HRMS spectrum of **4g**

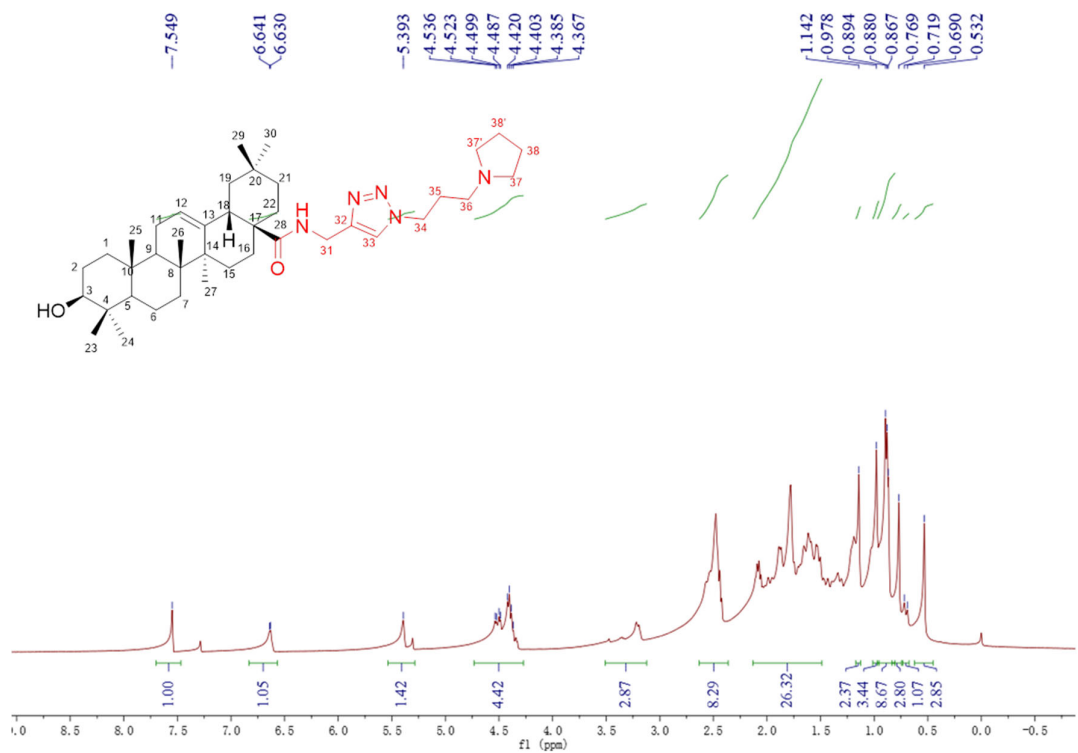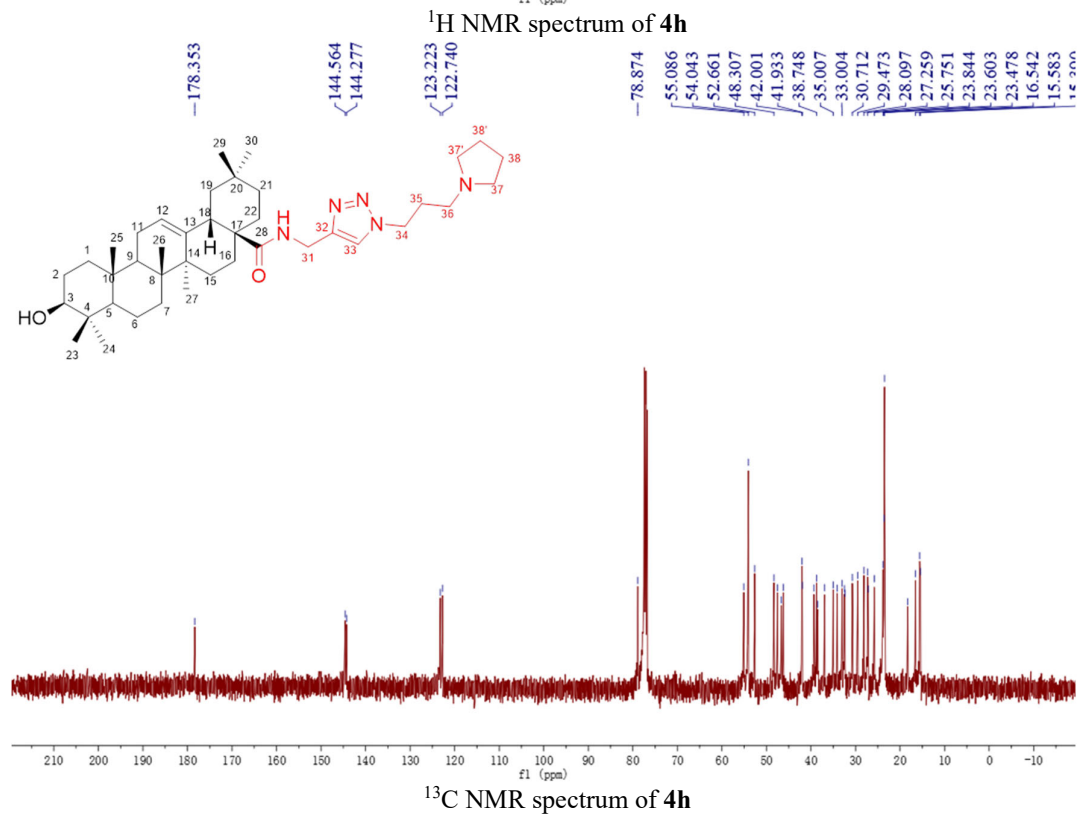



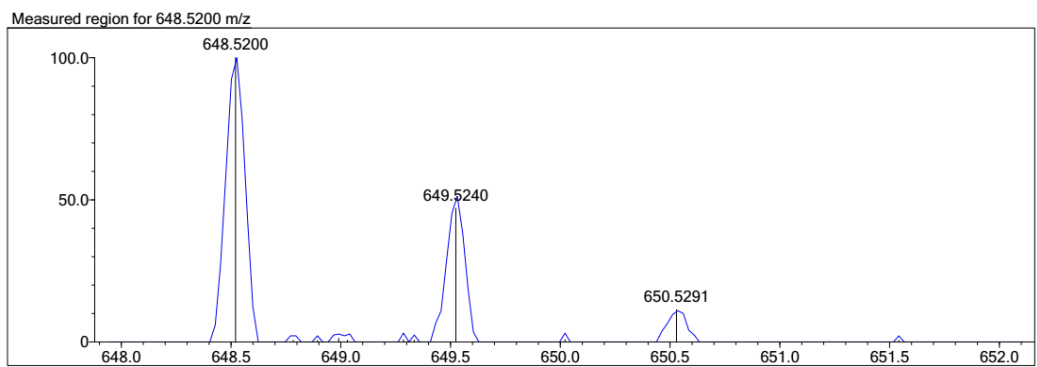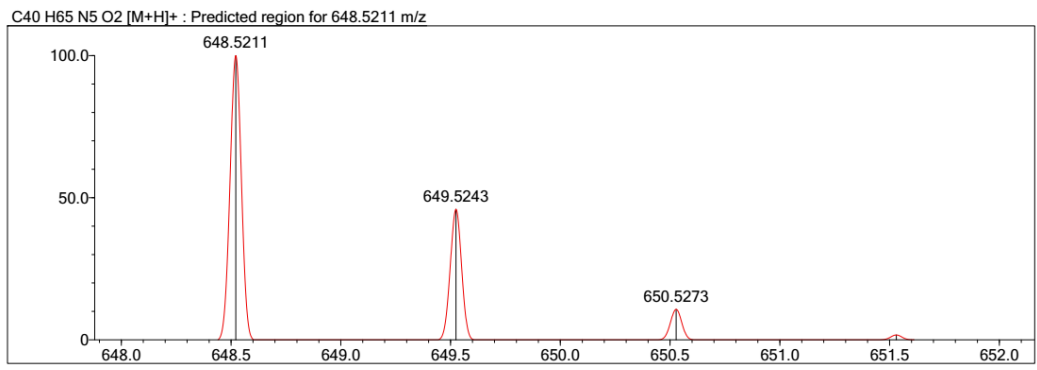

| Rank | Score | Formula (M)   | Ion                | Meas. m/z | Pred. m/z | Df. (mDa) | Df. (ppm) | Isc   | DBE  |
|------|-------|---------------|--------------------|-----------|-----------|-----------|-----------|-------|------|
| 1    | 81.62 | C40 H65 N5 O2 | [M+H] <sup>+</sup> | 648.5200  | 648.5211  | -1.1      | -1.70     | 83.07 | 11.0 |

HRMS spectrum of 4h

7.674  
7.669  
6.666  
5.390  
4.448  
4.437  
4.432  
4.422  
4.416  
4.362  
4.354  
4.349  
3.692  
3.476  
3.219  
3.200  
2.823  
2.808  
2.798  
2.793  
2.572  
2.541  
2.491  
2.071  
2.030  
1.994  
1.962  
1.892  
1.874  
1.780  
1.747  
1.713  
1.684  
1.649  
1.610  
1.594  
1.552  
1.531  
1.520  
1.512  
1.194  
1.145  
1.081  
0.896  
0.879  
0.772  
0.726  
0.697  
0.541

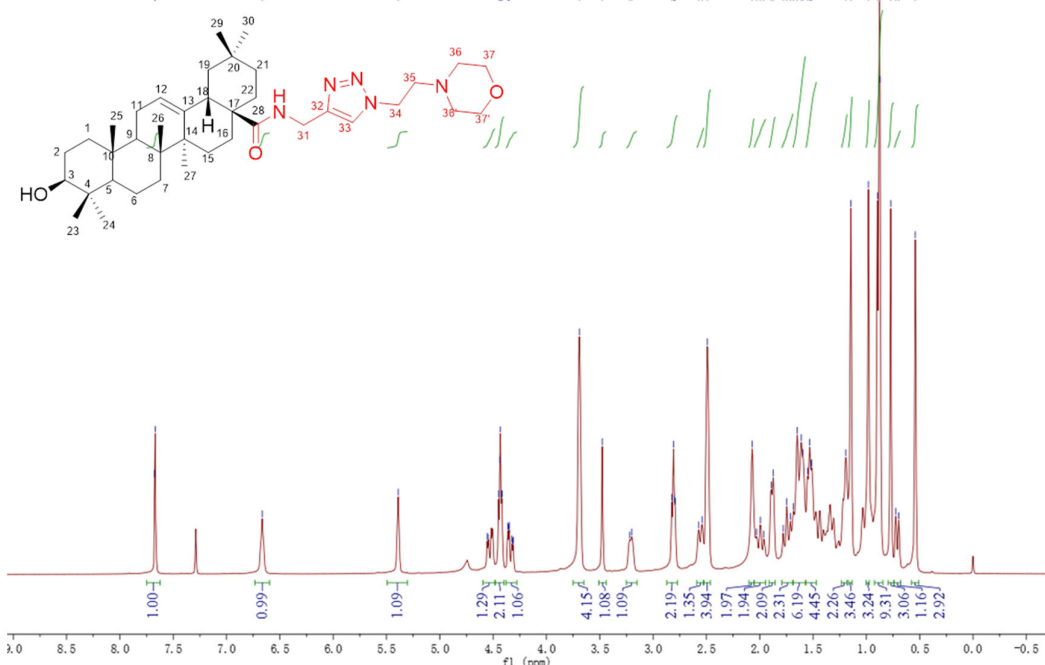

<sup>1</sup>H spectrum of 4i

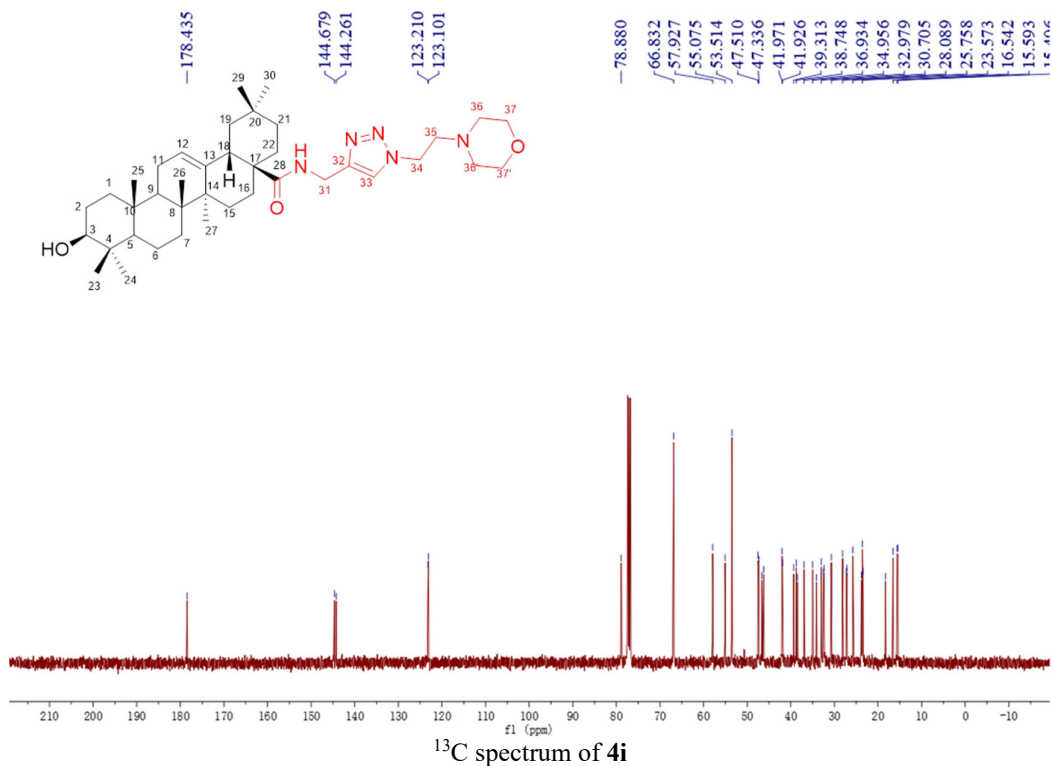

Measured region for 650.4993 m/z

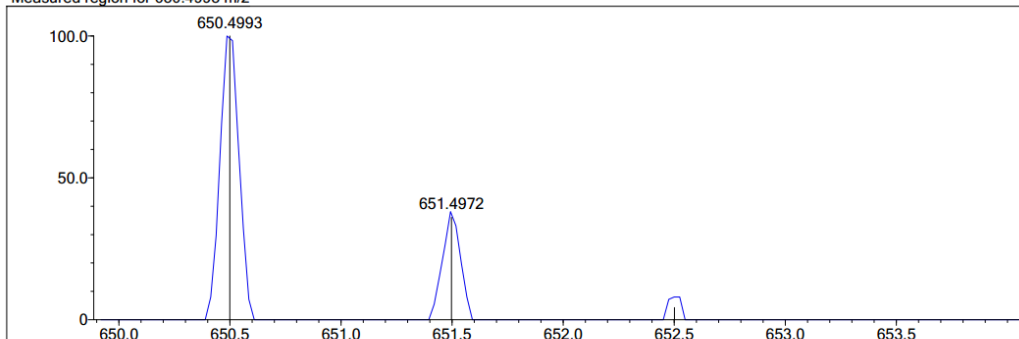

C39 H63 N5 O3 [M+H]<sup>+</sup> : Predicted region for 650.5004 m/z

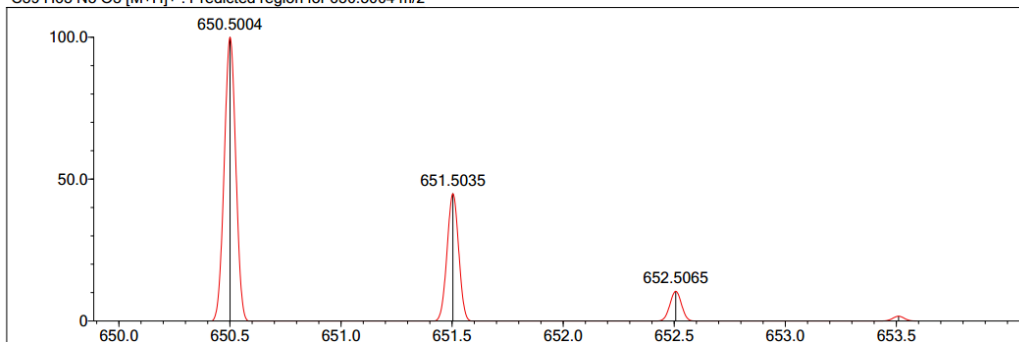

| Rank | Score | Formula (M)   | Ion                | Meas. m/z | Pred. m/z | Df. (mDa) | Df. (ppm) | Iso   | DBE  |
|------|-------|---------------|--------------------|-----------|-----------|-----------|-----------|-------|------|
| 2    | 64.96 | C39 H63 N5 O3 | [M+H] <sup>+</sup> | 650.4993  | 650.5004  | -1.1      | -1.69     | 66.10 | 11.0 |

HRMS spectrum of **4i**

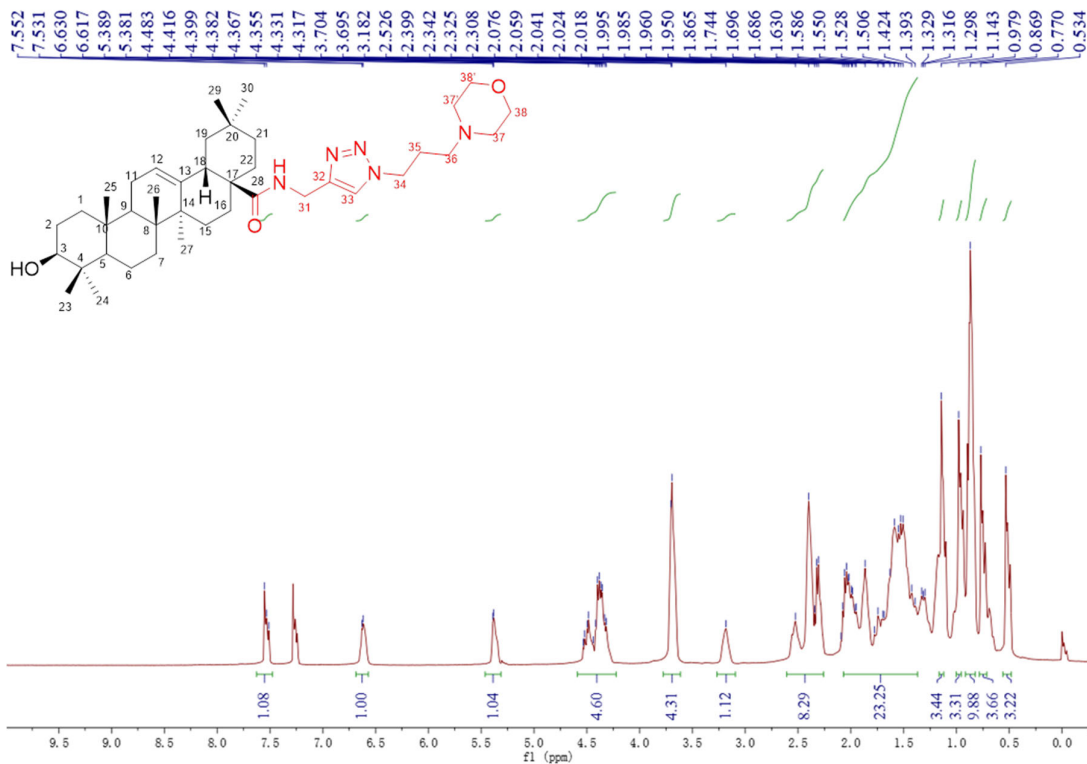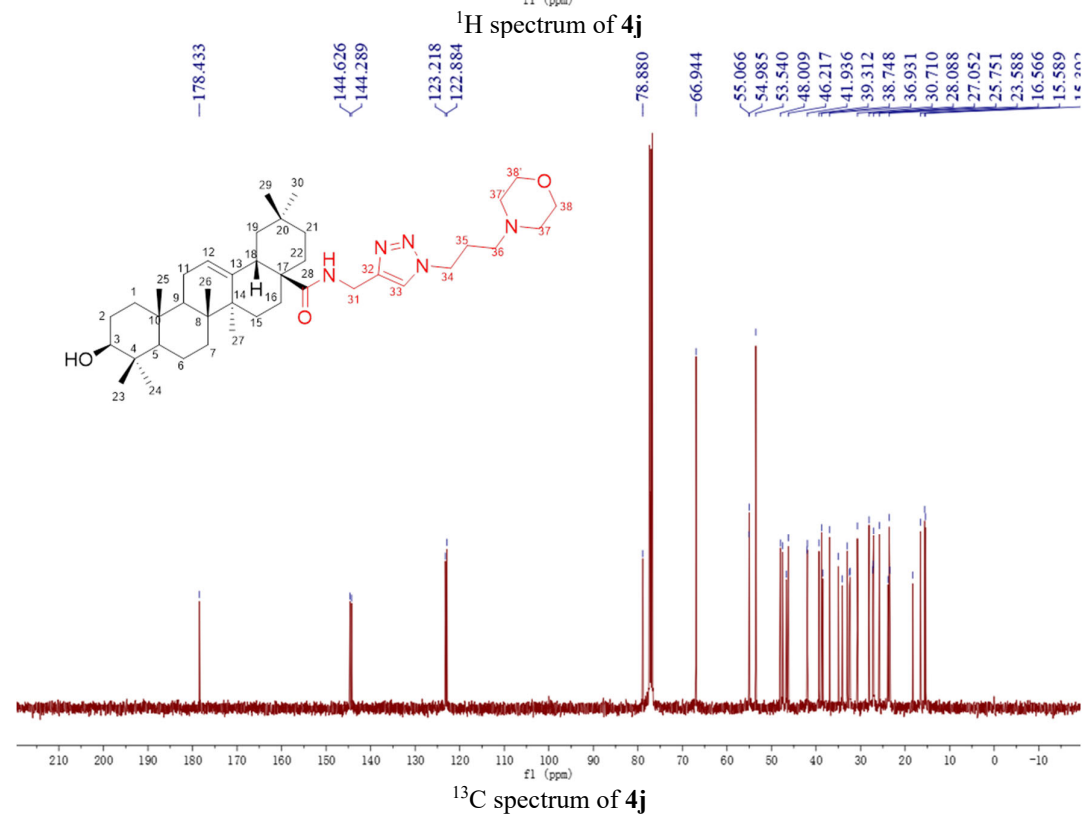

Measured region for 664.5158 m/z

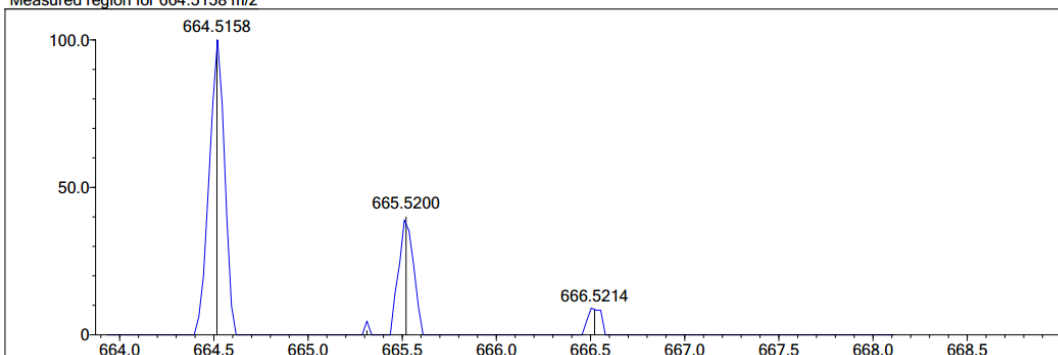

C40 H65 N5 O3 [M+H]<sup>+</sup> : Predicted region for 664.5160 m/z

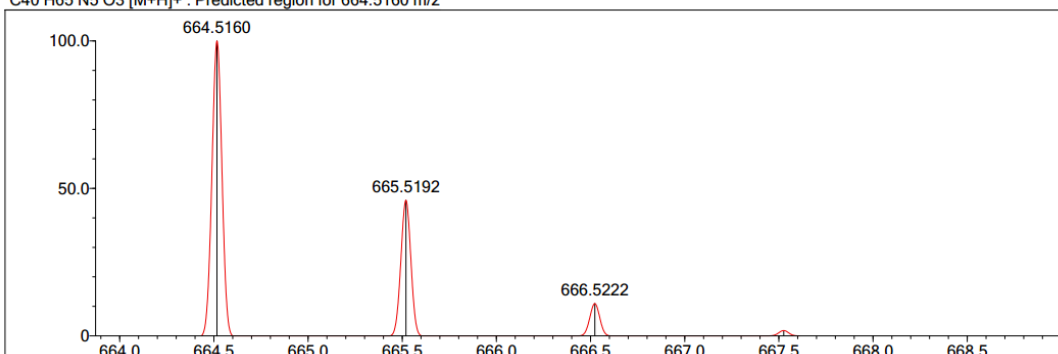

| Rank | Score | Formula (M)   | Ion                | Meas. m/z | Pred. m/z | Df. (mDa) | Df. (ppm) | Iso   | DBE  |
|------|-------|---------------|--------------------|-----------|-----------|-----------|-----------|-------|------|
| 1    | 74.24 | C40 H65 N5 O3 | [M+H] <sup>+</sup> | 664.5158  | 664.5160  | -0.2      | -0.30     | 74.24 | 11.0 |

HRMS spectrum of 4j

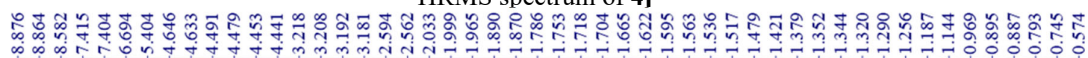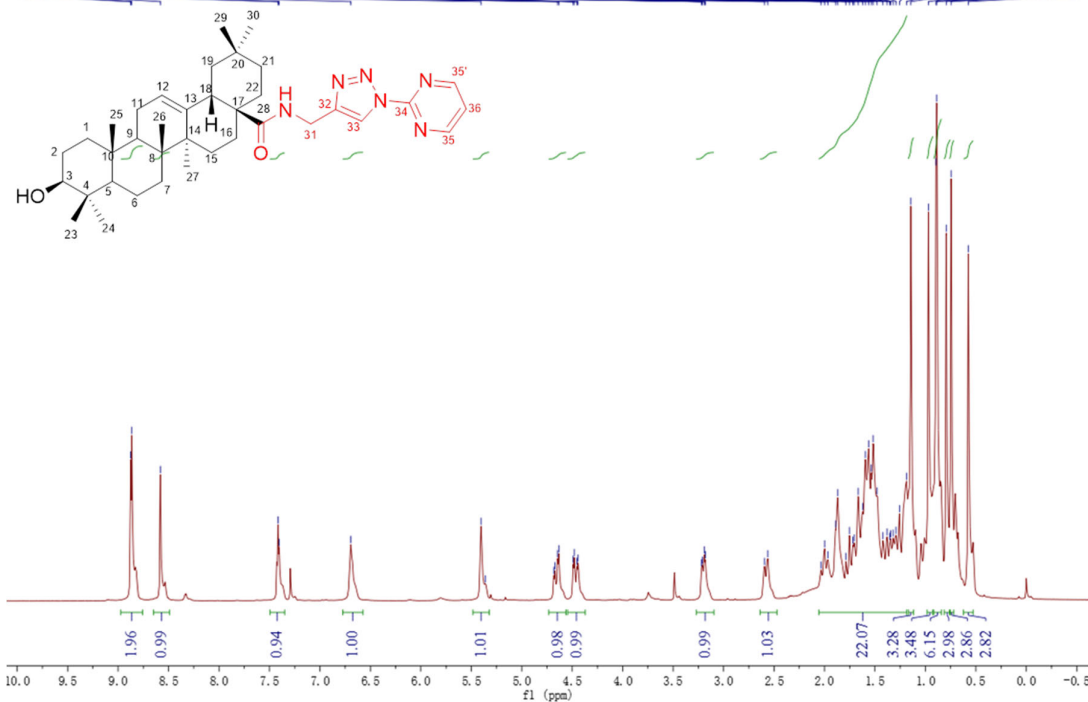

<sup>1</sup>H NMR spectrum of 4k

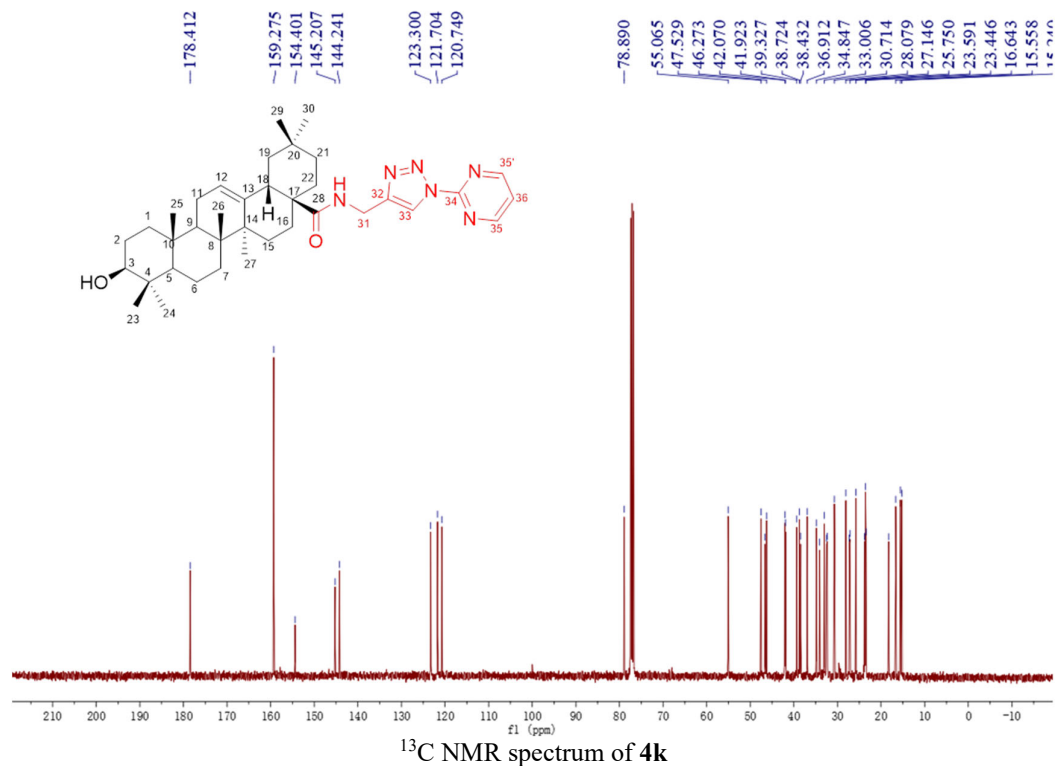

Measured region for 615.4361 m/z

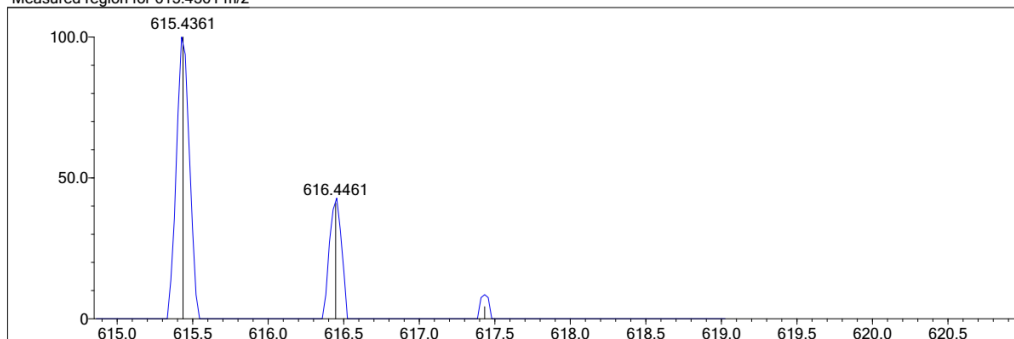

C37 H54 N6 O2 [M+H]<sup>+</sup> : Predicted region for 615.4381 m/z

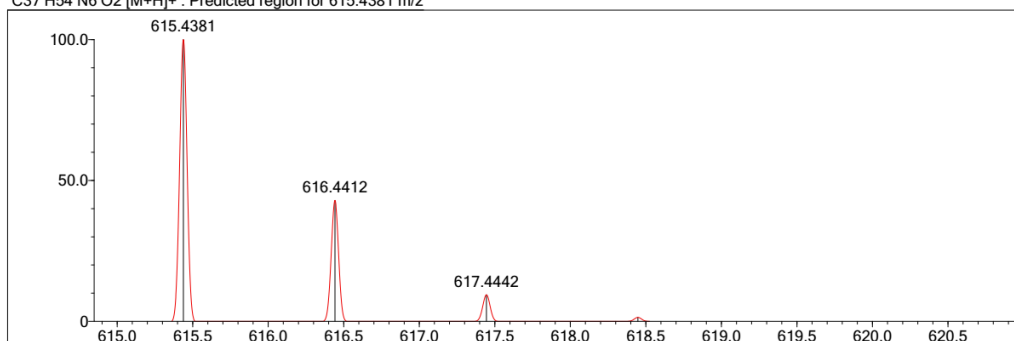

| Rank | Score | Formula (M)   | Ion                | Meas. m/z | Pred. m/z | Df. (mDa) | Df. (ppm) | Iso   | DBE  |
|------|-------|---------------|--------------------|-----------|-----------|-----------|-----------|-------|------|
| 4    | 68.29 | C37 H54 N6 O2 | [M+H] <sup>+</sup> | 615.4361  | 615.4381  | -2.0      | -3.25     | 72.36 | 14.0 |

HRMS spectrum of 4k

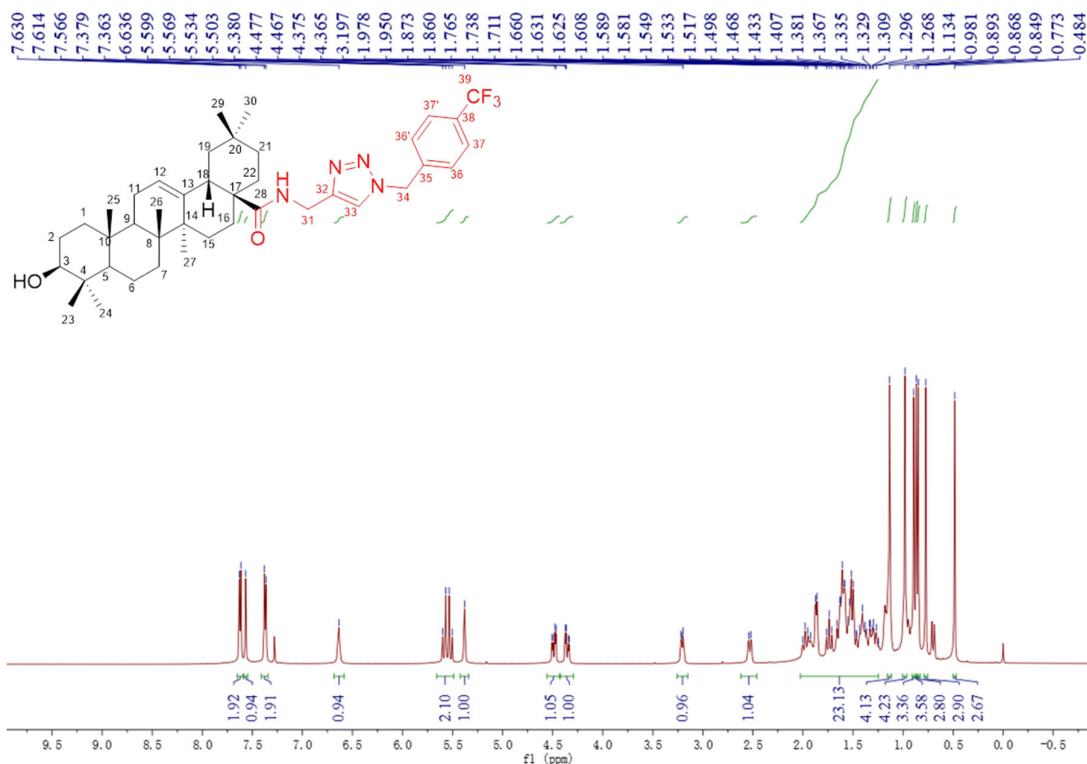

**<sup>1</sup>H NMR spectrum of 4I**

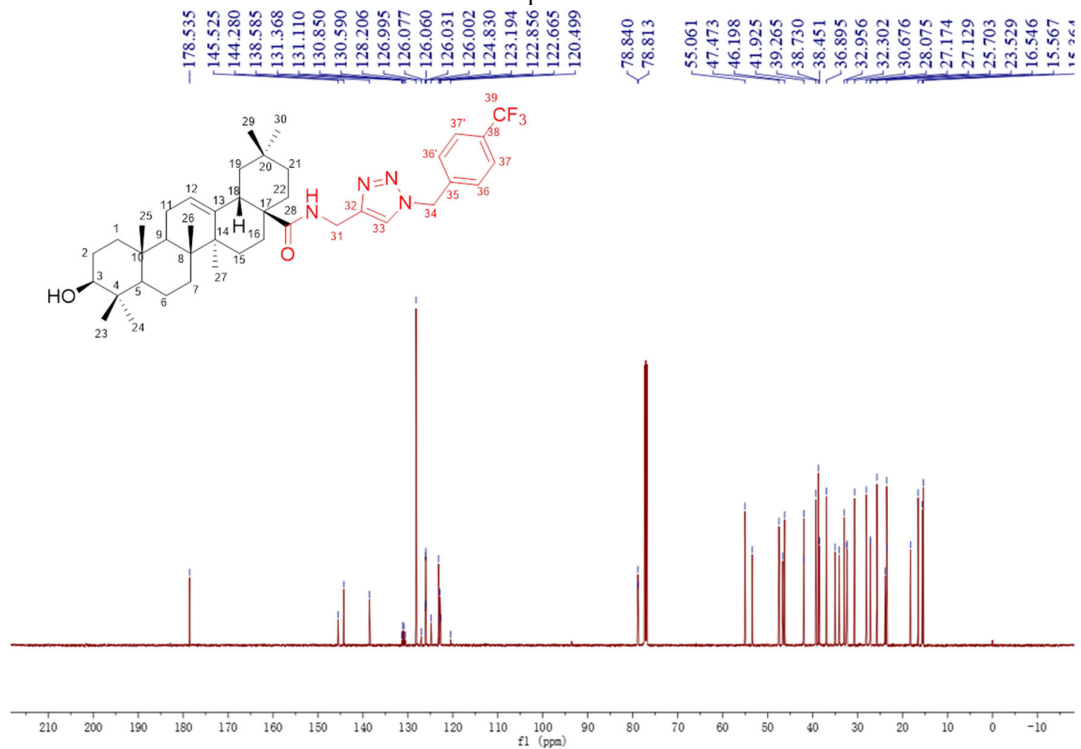

**<sup>13</sup>C NMR spectrum of 4I**

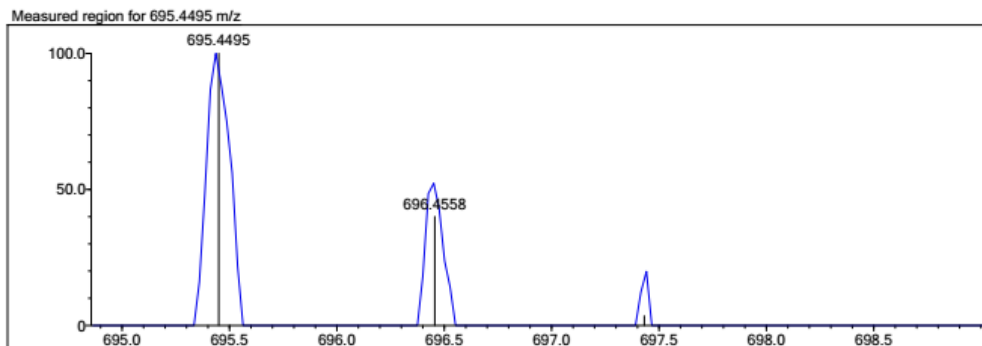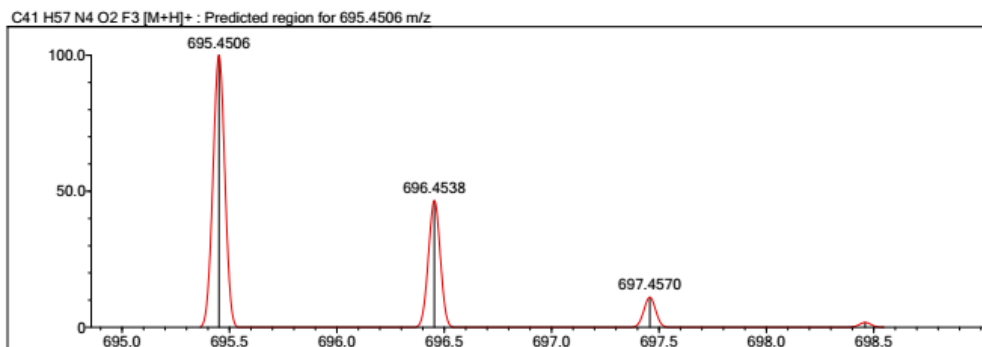

| Rank | Score | Formula (M)      | Ion                | Meas. m/z | Pred. m/z | Df. (mDa) | Df. (ppm) | Isoc  | DBE  |
|------|-------|------------------|--------------------|-----------|-----------|-----------|-----------|-------|------|
| 30   | 41.49 | C41 H57 N4 O2 F3 | [M+H] <sup>+</sup> | 695.4495  | 695.4506  | -1.1      | -1.58     | 42.11 | 14.0 |

HRMS spectrum of **4l**

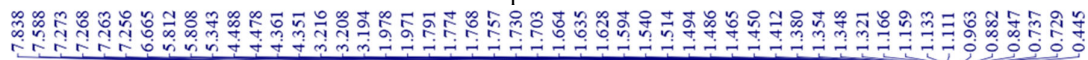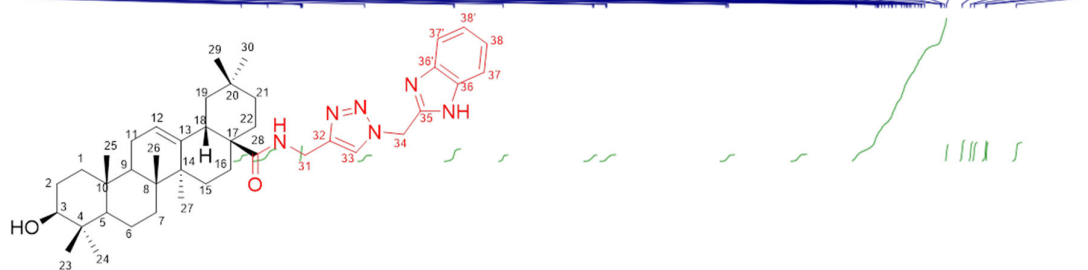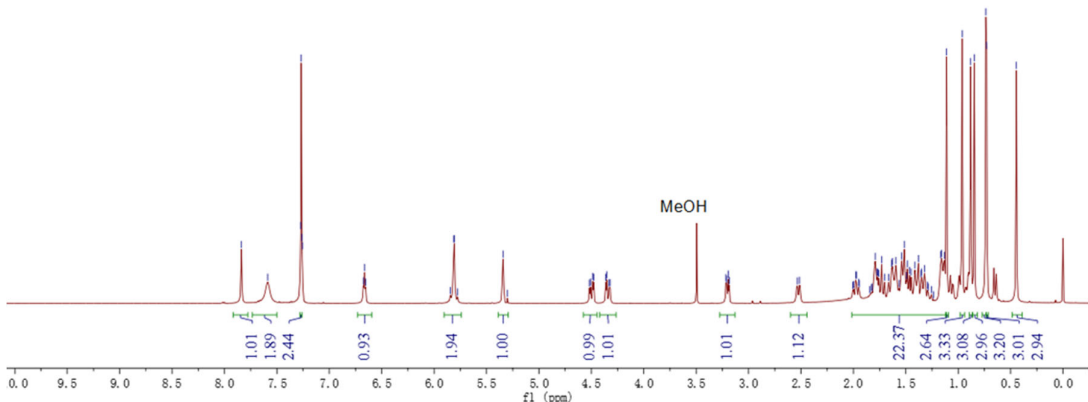

<sup>1</sup>H NMR spectrum of **4m**

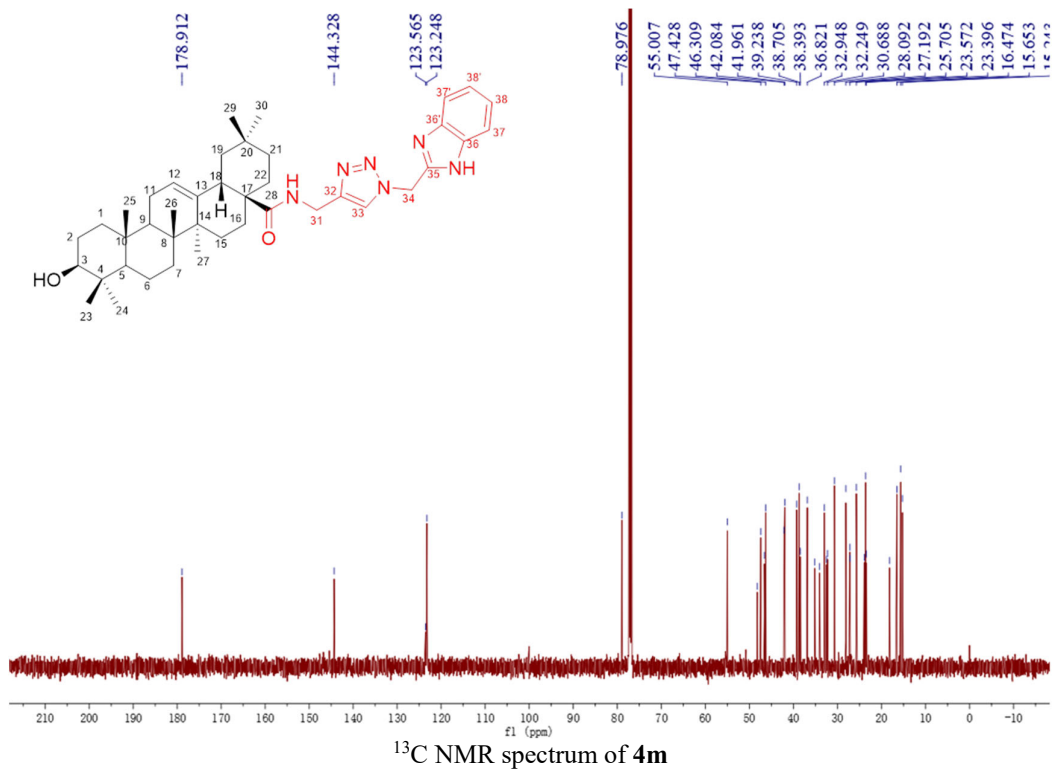

Measured region for 667.4695 m/z

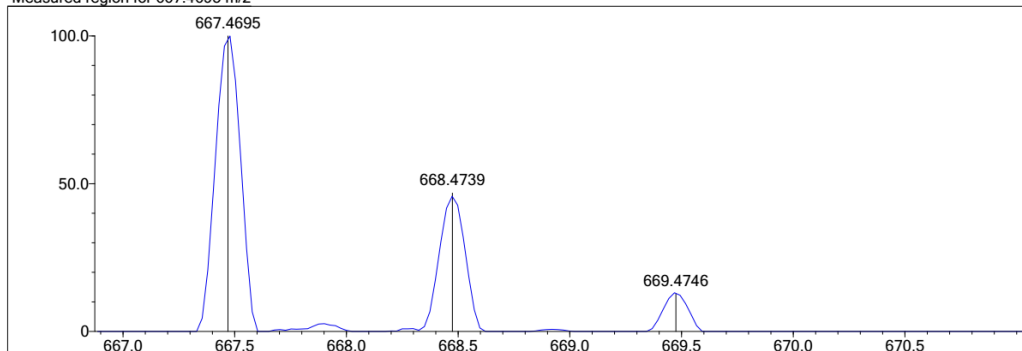

C41 H58 N6 O2 [M+H]<sup>+</sup>: Predicted region for 667.4694 m/z

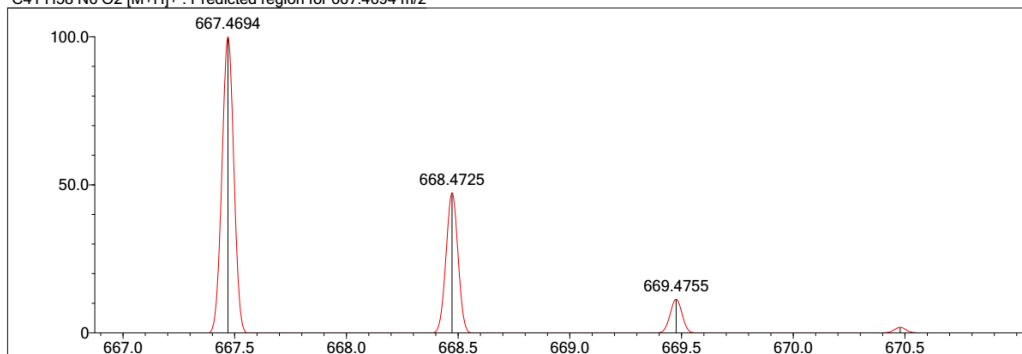

| Rank | Score  | Formula (M)   | Ion                | Meas. m/z | Pred. m/z | Df. (mDa) | Df. (ppm) | Iso    | DBE  |
|------|--------|---------------|--------------------|-----------|-----------|-----------|-----------|--------|------|
| 1    | 100.00 | C41 H58 N6 O2 | [M+H] <sup>+</sup> | 667.4695  | 667.4694  | 0.1       | 0.15      | 100.00 | 16.0 |

HRMS spectrum of 4m



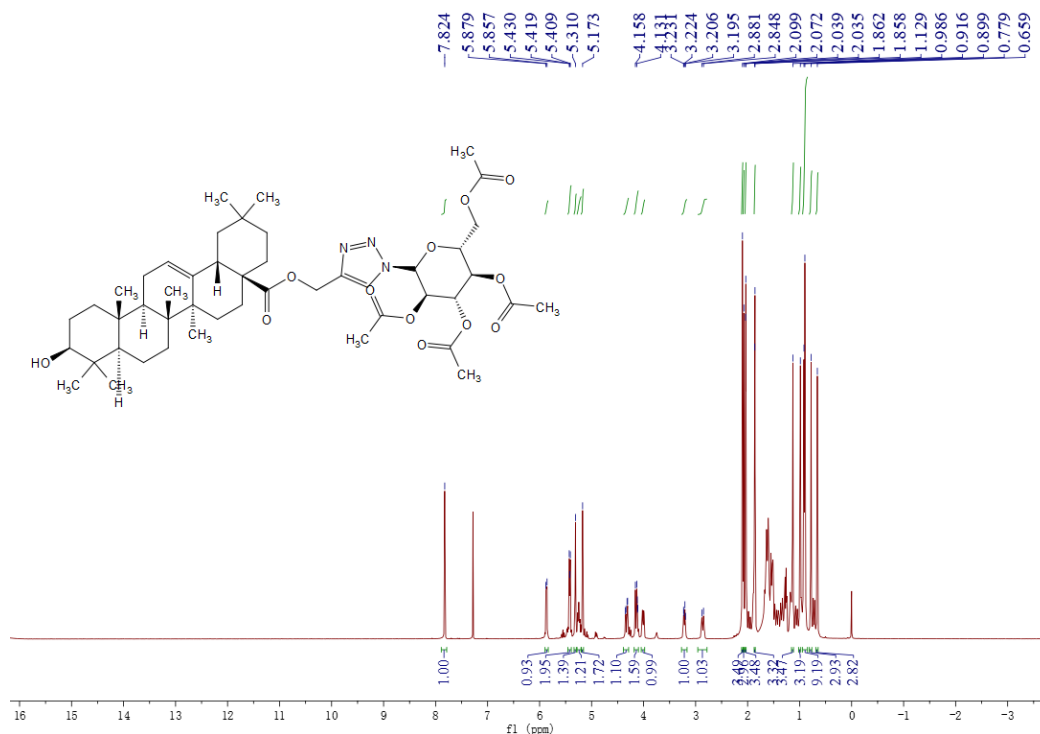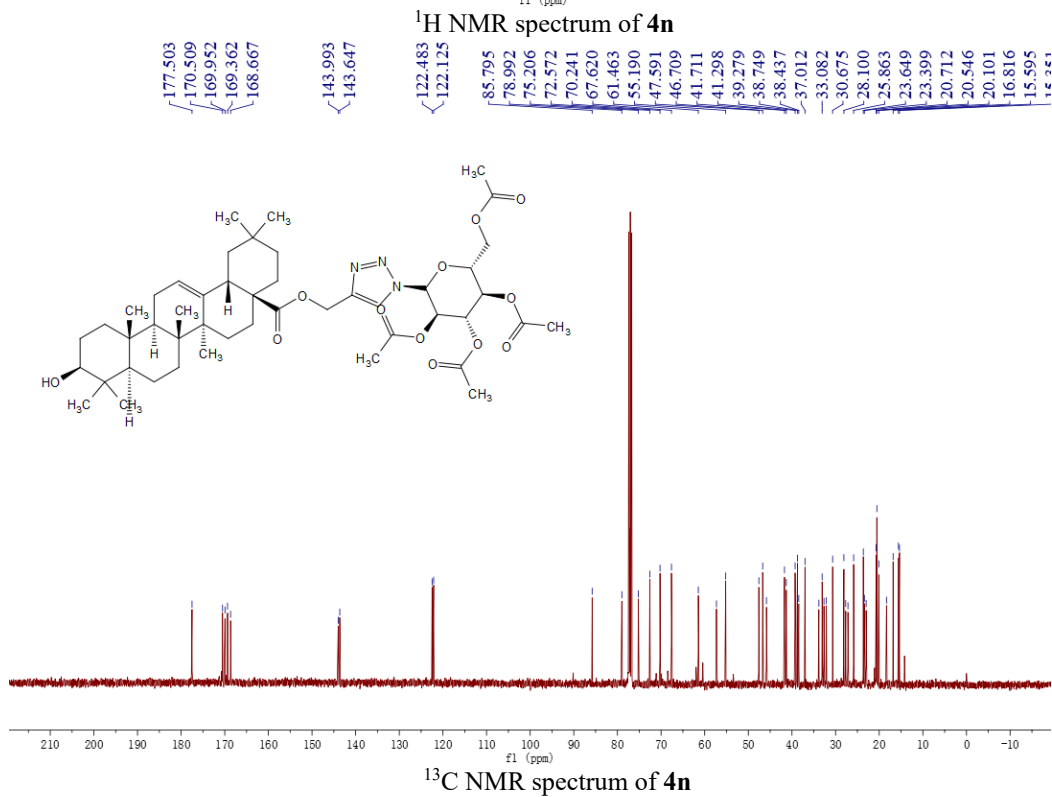

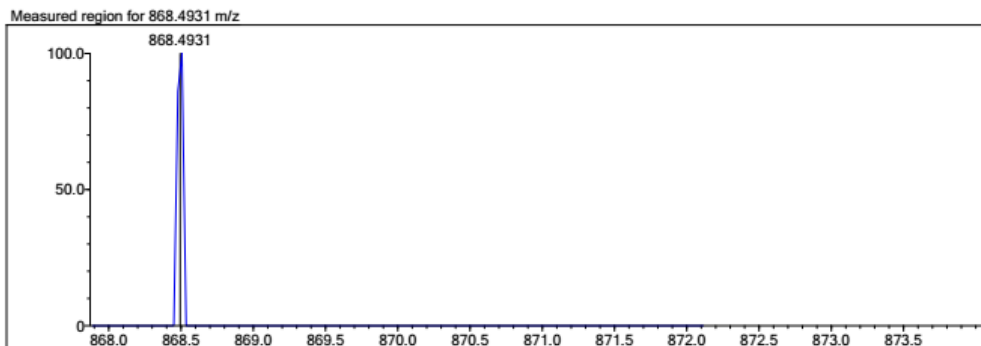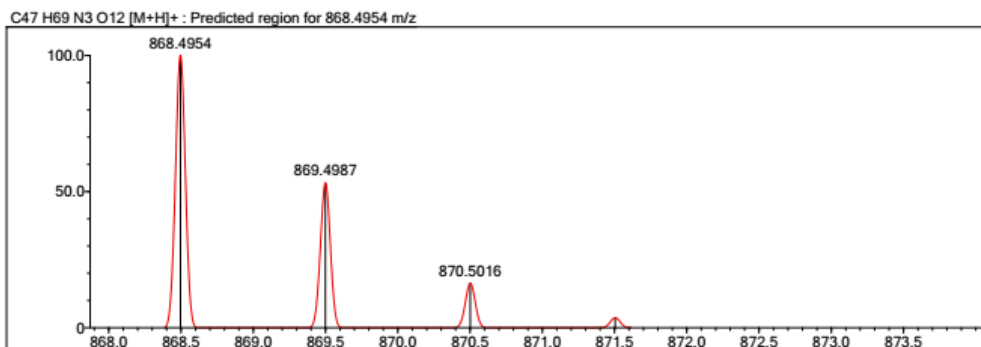

| Rank | Score | Formula (M)    | Ion                | Meas. m/z | Pred. m/z | Df. (mDa) | Df. (ppm) | Isot | DBE  |
|------|-------|----------------|--------------------|-----------|-----------|-----------|-----------|------|------|
| 2    | 0.00  | C47 H69 N3 O12 | [M+H] <sup>+</sup> | 868.4931  | 868.4954  | -2.3      | -2.65     | 0.00 | 15.0 |

HRMS spectrum of **4n**

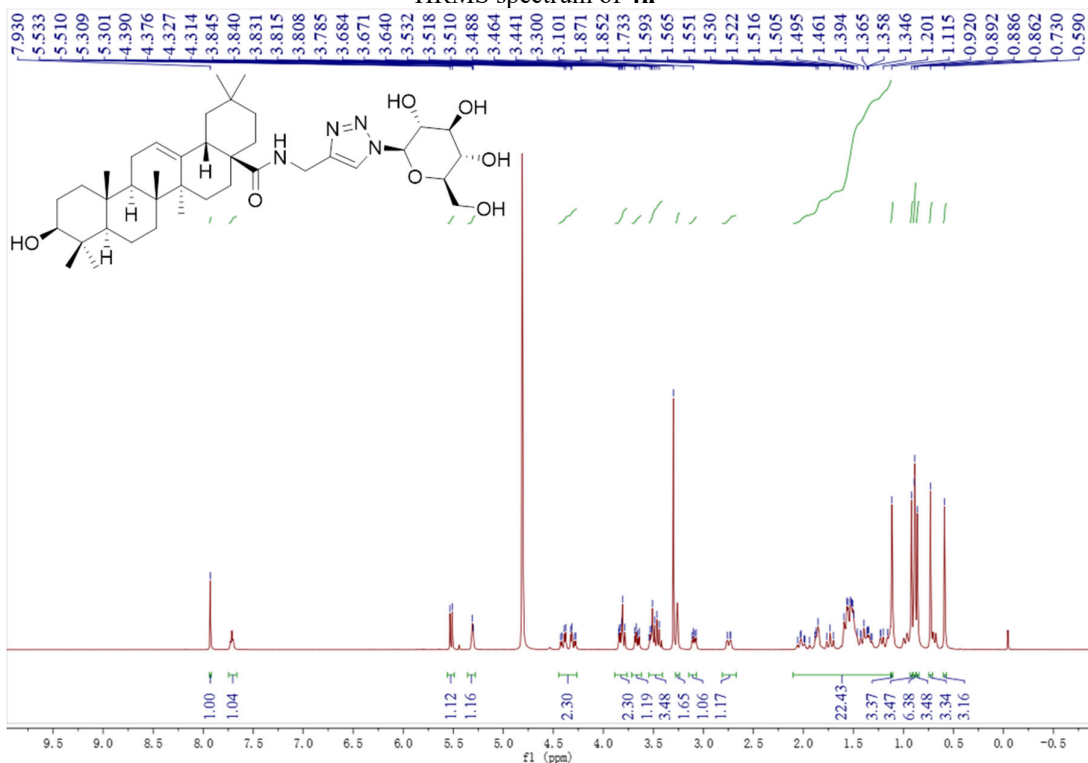

<sup>1</sup>H NMR spectrum of **4o**

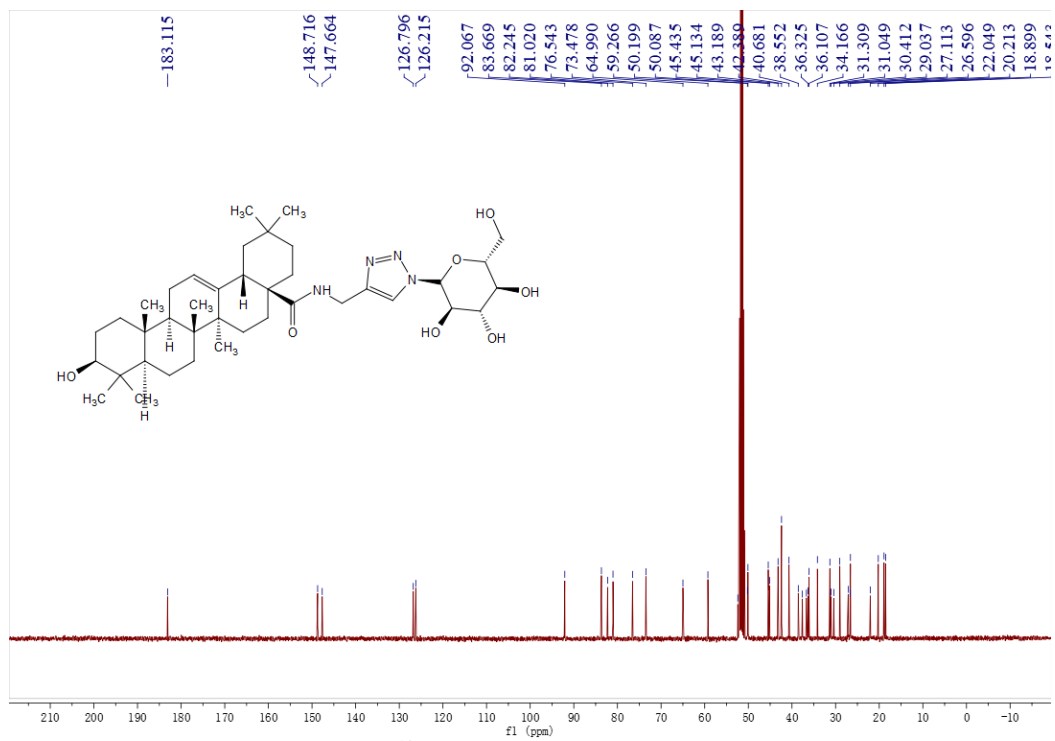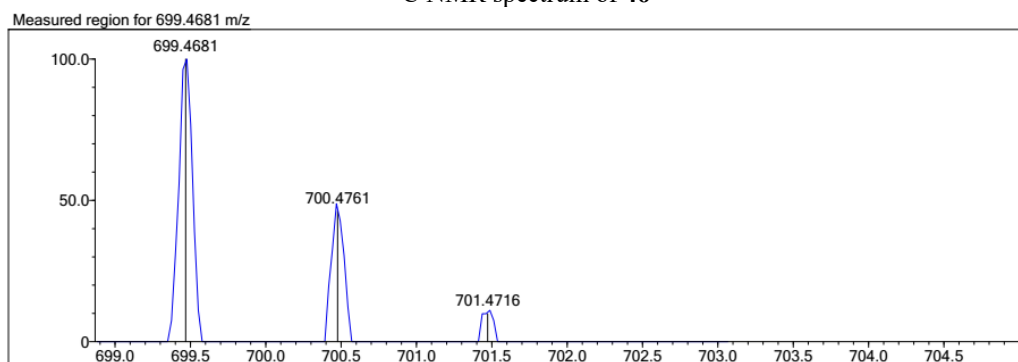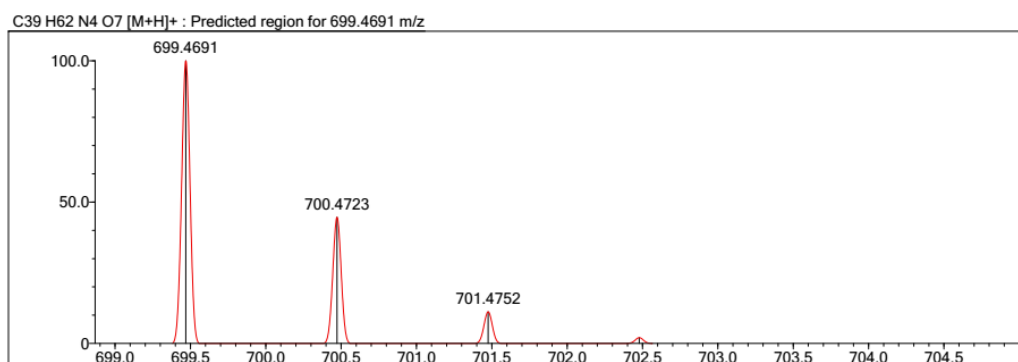

| Rank | Score | Formula (M)   | Ion                | Meas. m/z | Pred. m/z | Df. (mDa) | Df. (ppm) | Iso   | DBE  |
|------|-------|---------------|--------------------|-----------|-----------|-----------|-----------|-------|------|
| 2    | 44.84 | C39 H62 N4 O7 | [M+H] <sup>+</sup> | 699.4681  | 699.4691  | -1.0      | -1.43     | 45.33 | 11.0 |

HRMS spectrum of 40

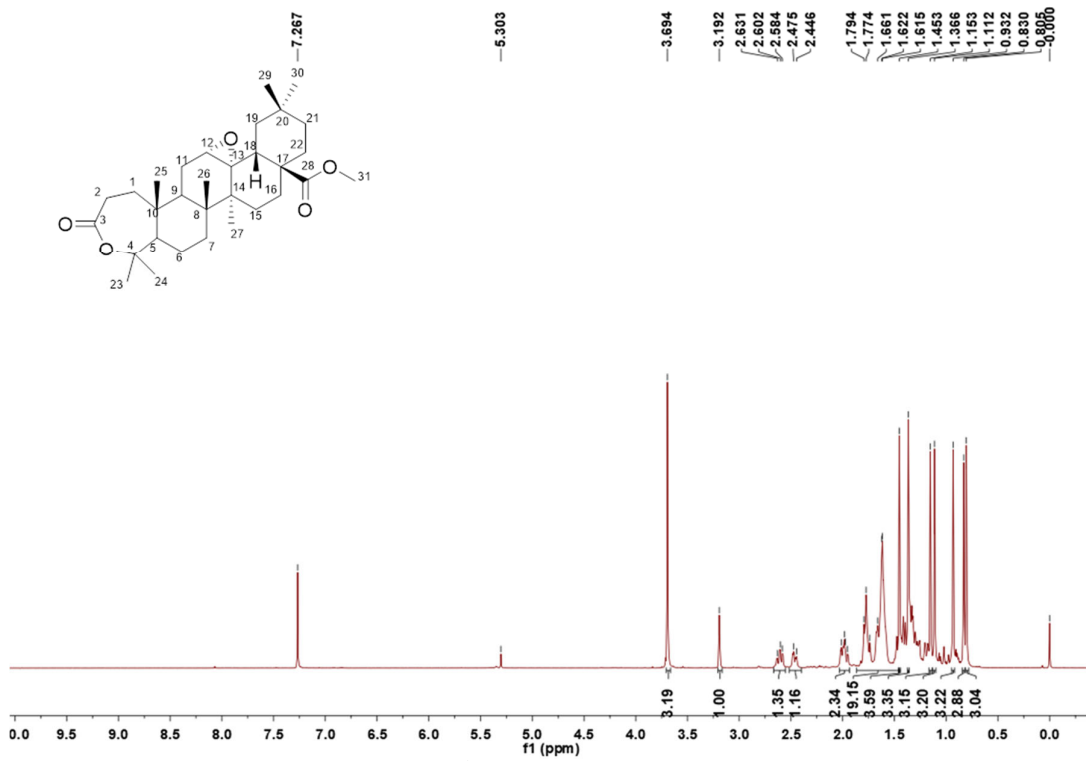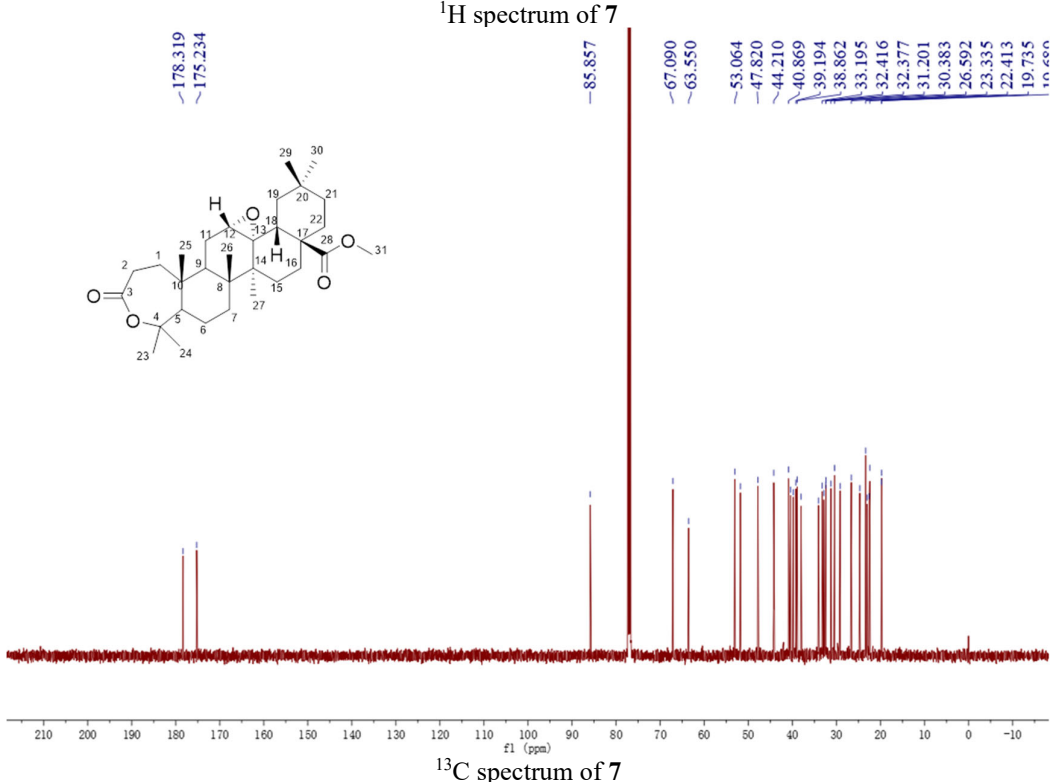

Measured region for 523.3417 m/z

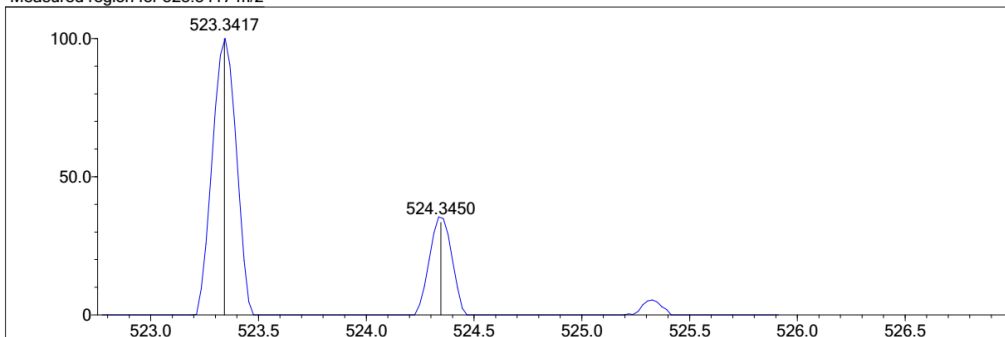

C31 H48 O5 [M+Na]<sup>+</sup> : Predicted region for 523.3394 m/z

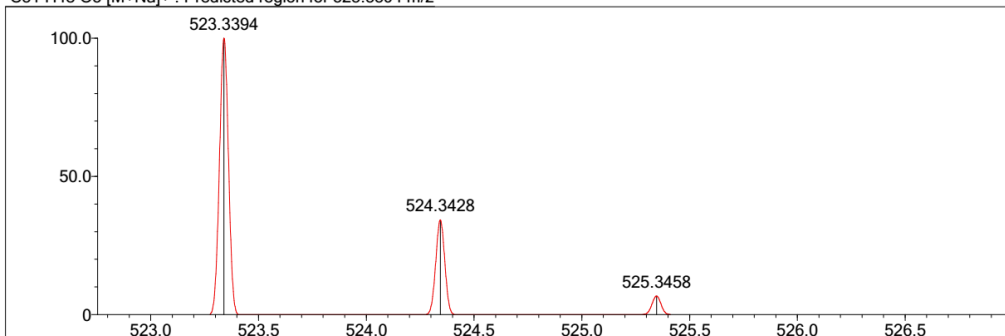

| Rank | Score | Formula (M) | Ion                 | Meas. m/z | Pred. m/z | Df. (mDa) | Df. (ppm) | Iso   | DBE |
|------|-------|-------------|---------------------|-----------|-----------|-----------|-----------|-------|-----|
| 1    | 62.79 | C31 H48 O5  | [M+Na] <sup>+</sup> | 523.3417  | 523.3394  | 2.3       | 4.39      | 68.61 | 8.0 |

HRMS spectrum of 7

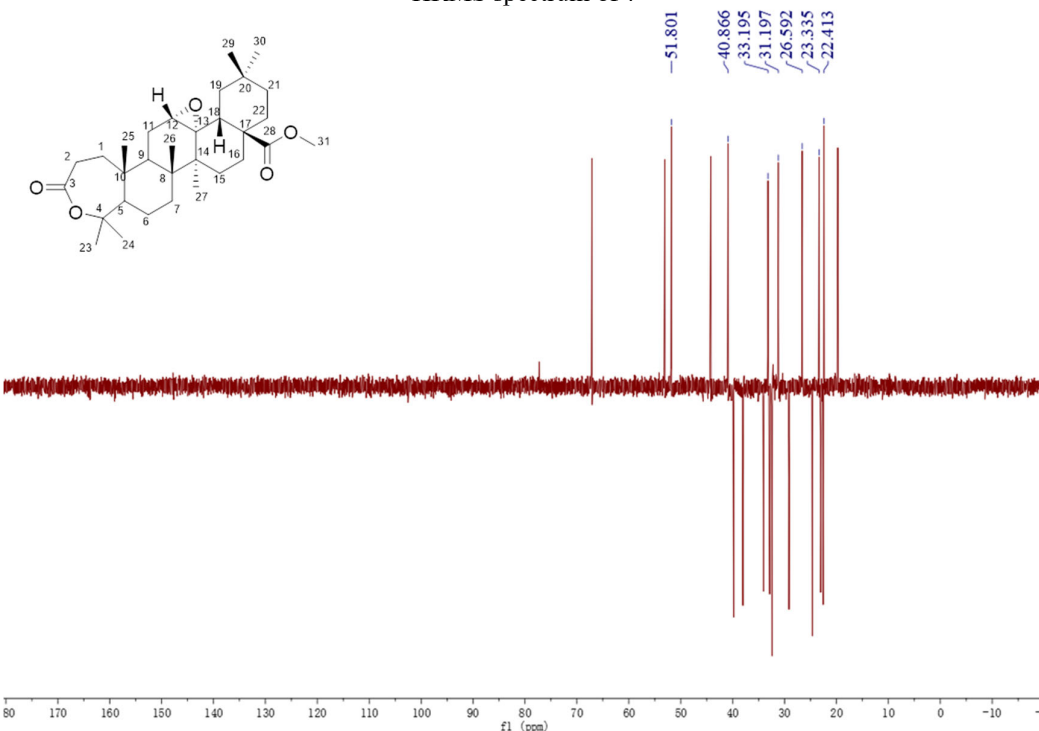

DEPT135 spectrum of 7

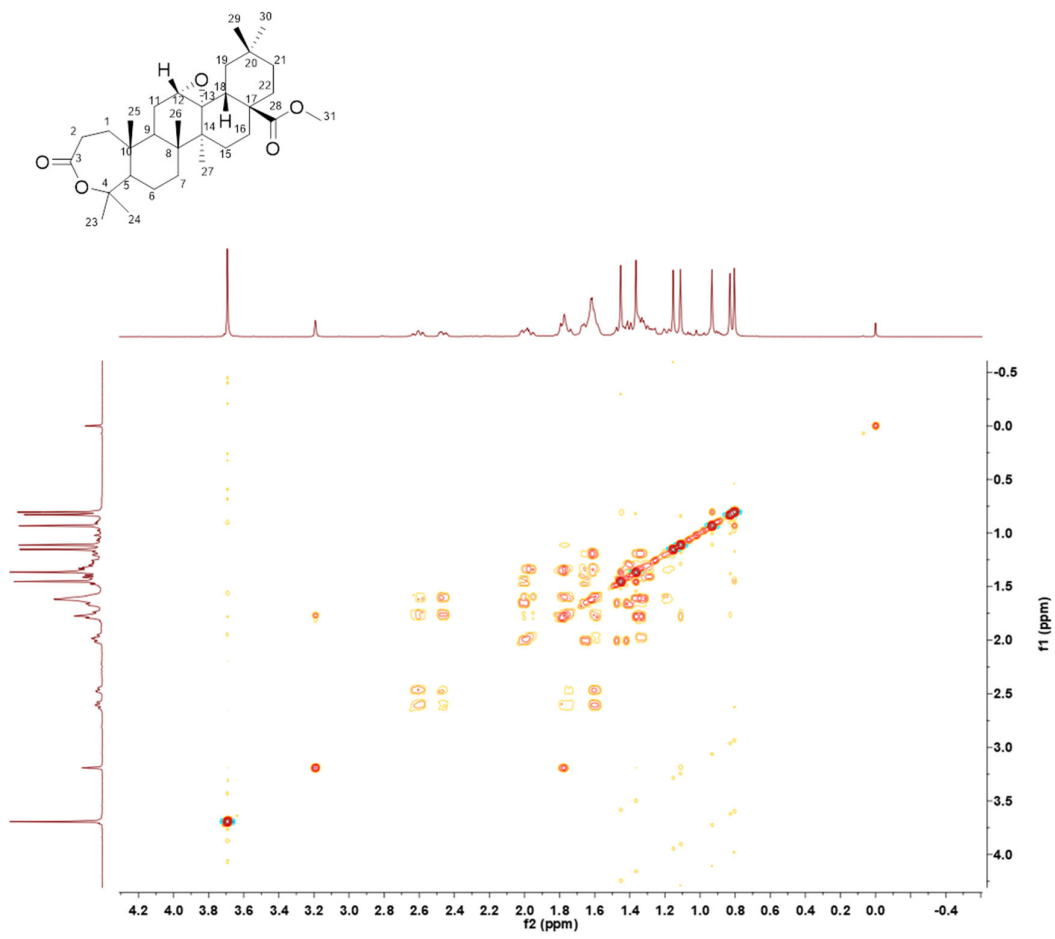

H,H-Cosy spectrum of 7

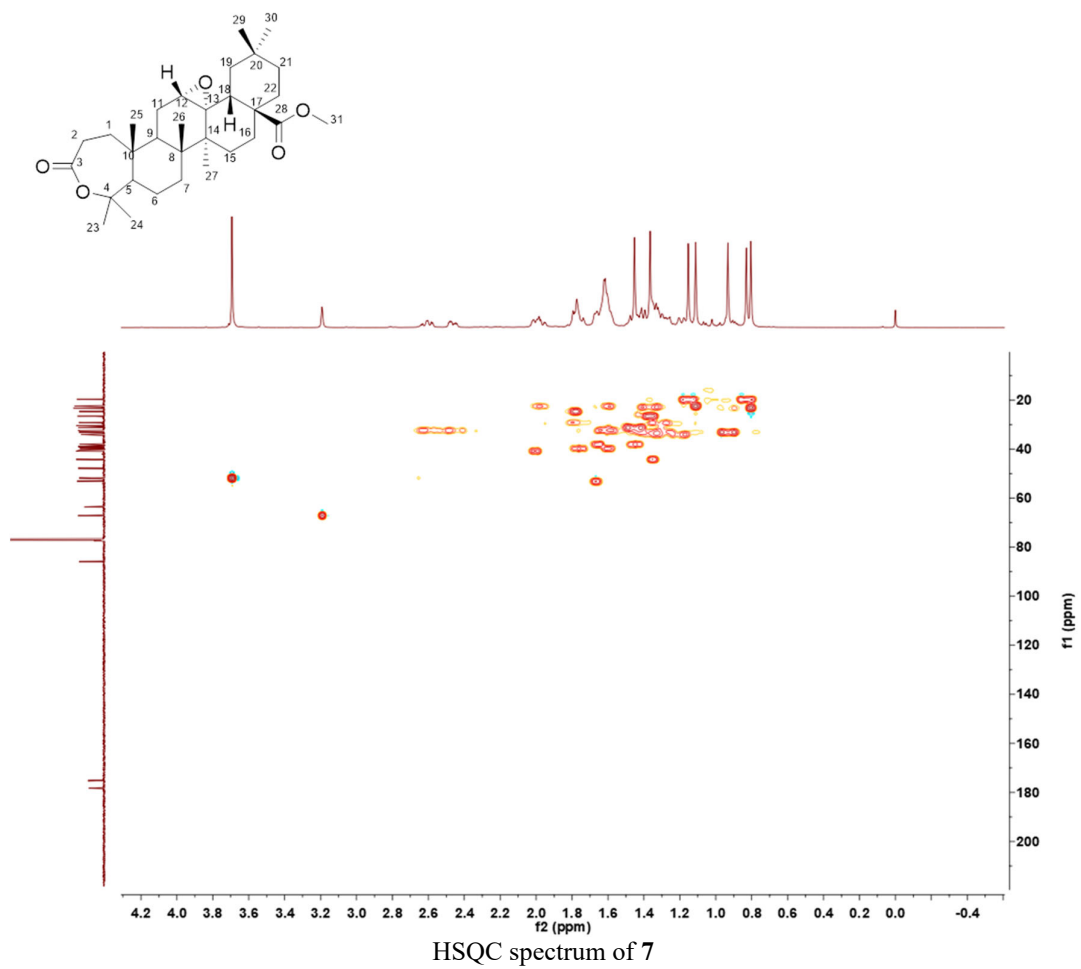

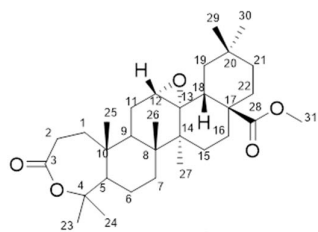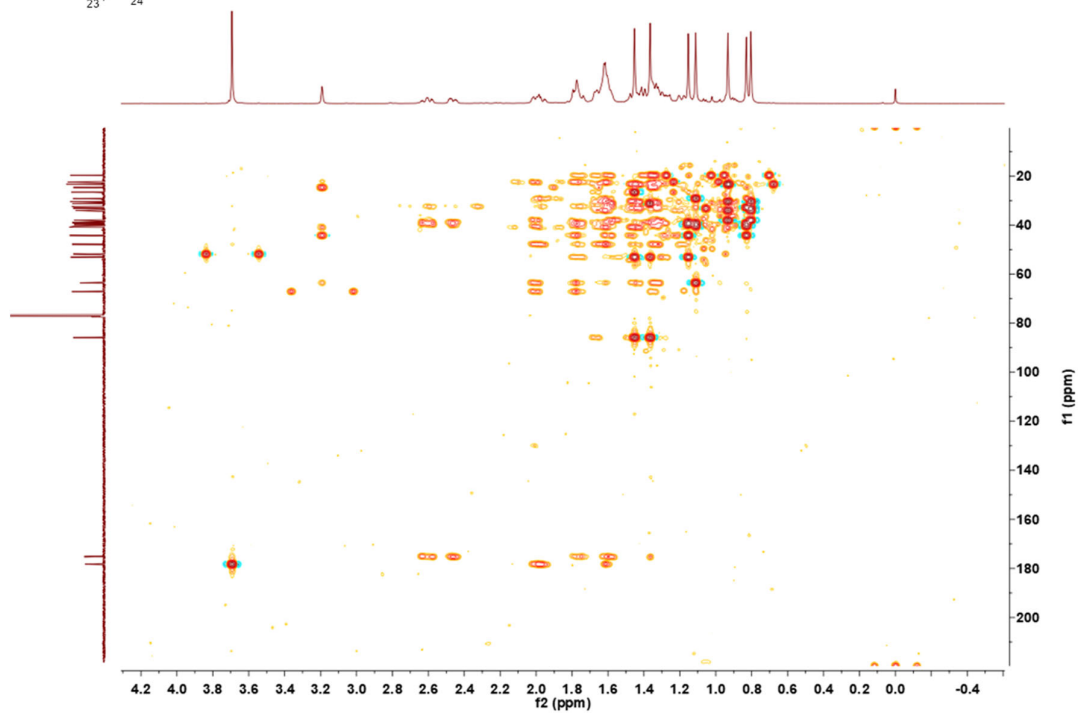

HMBC spectrum of 7



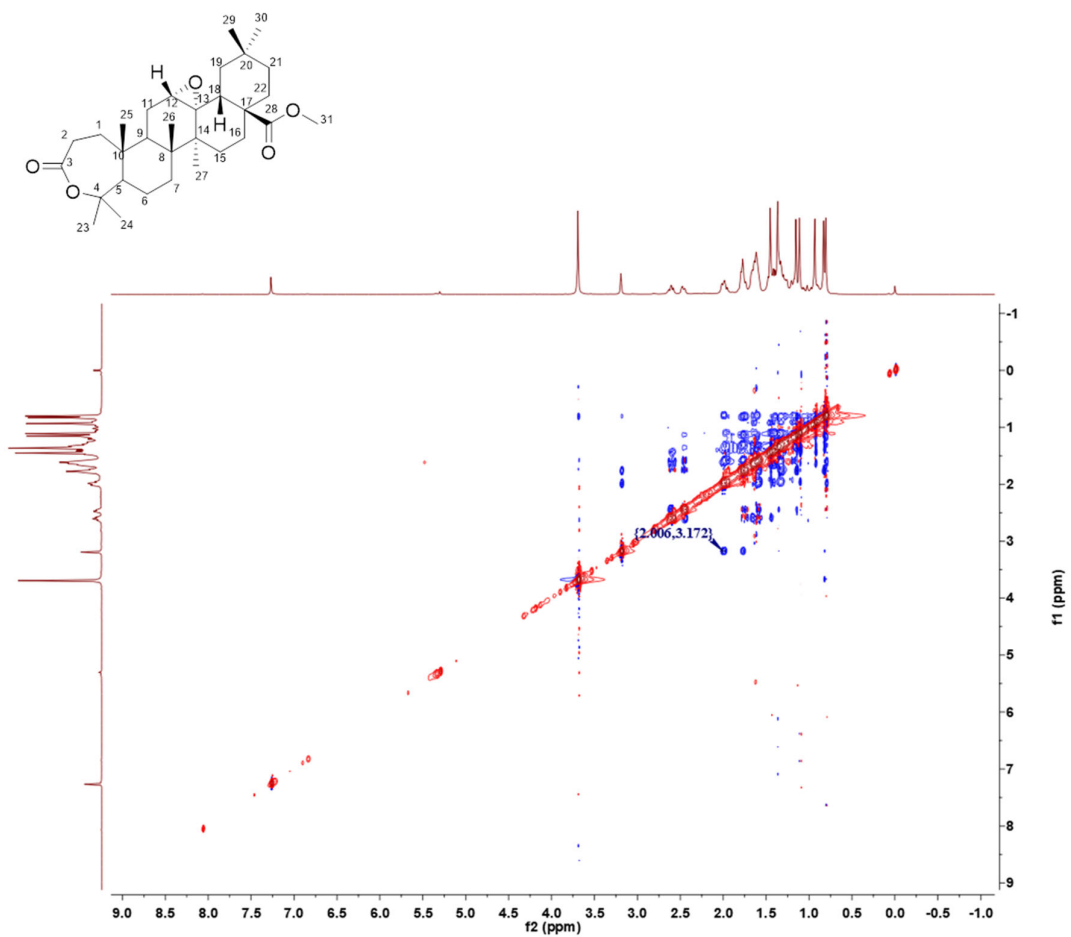

NOE spectrum of 7

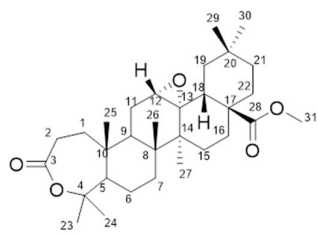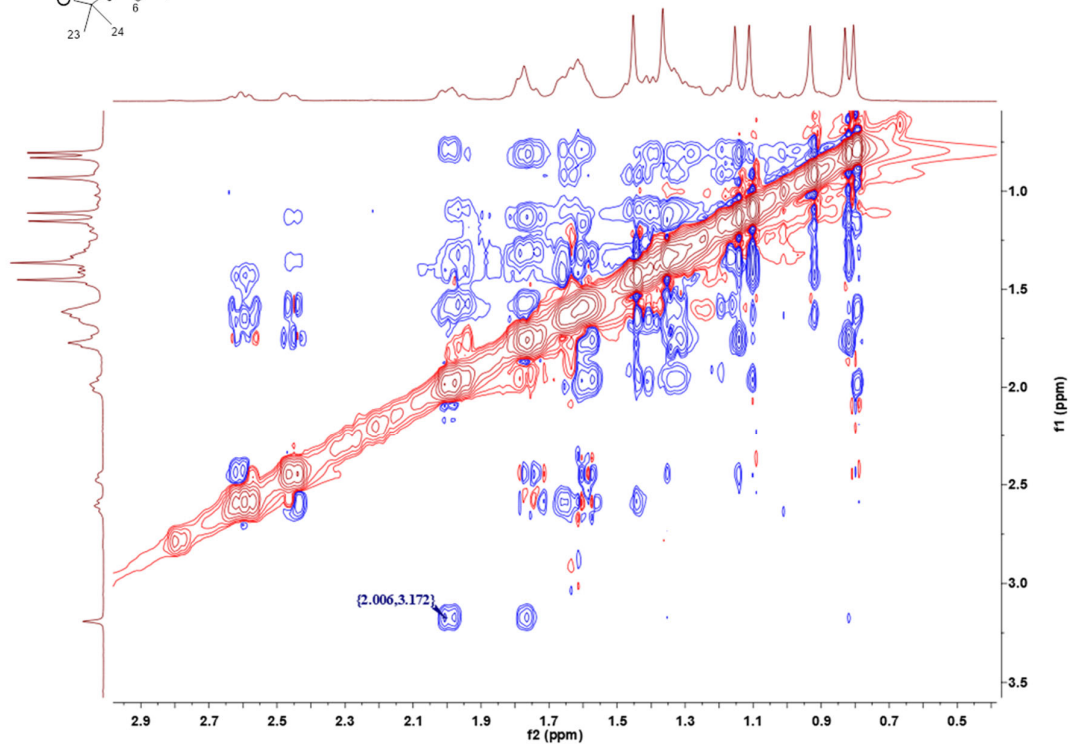

HMBC local zoom spectrum of 7

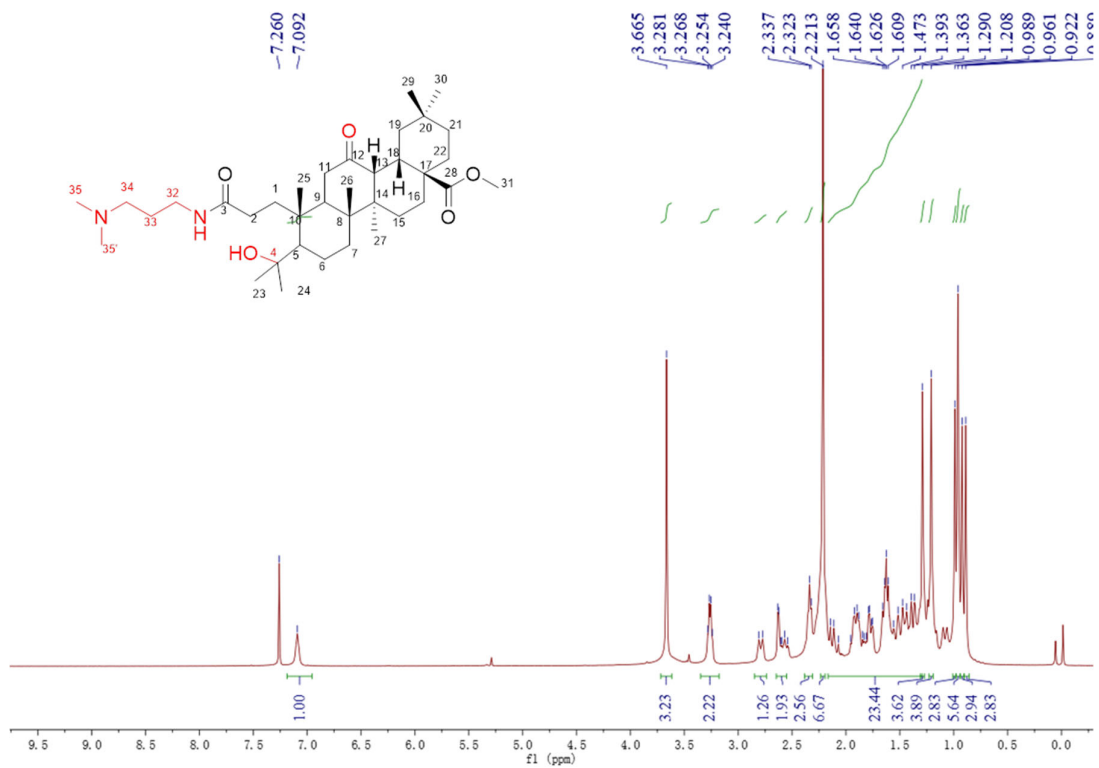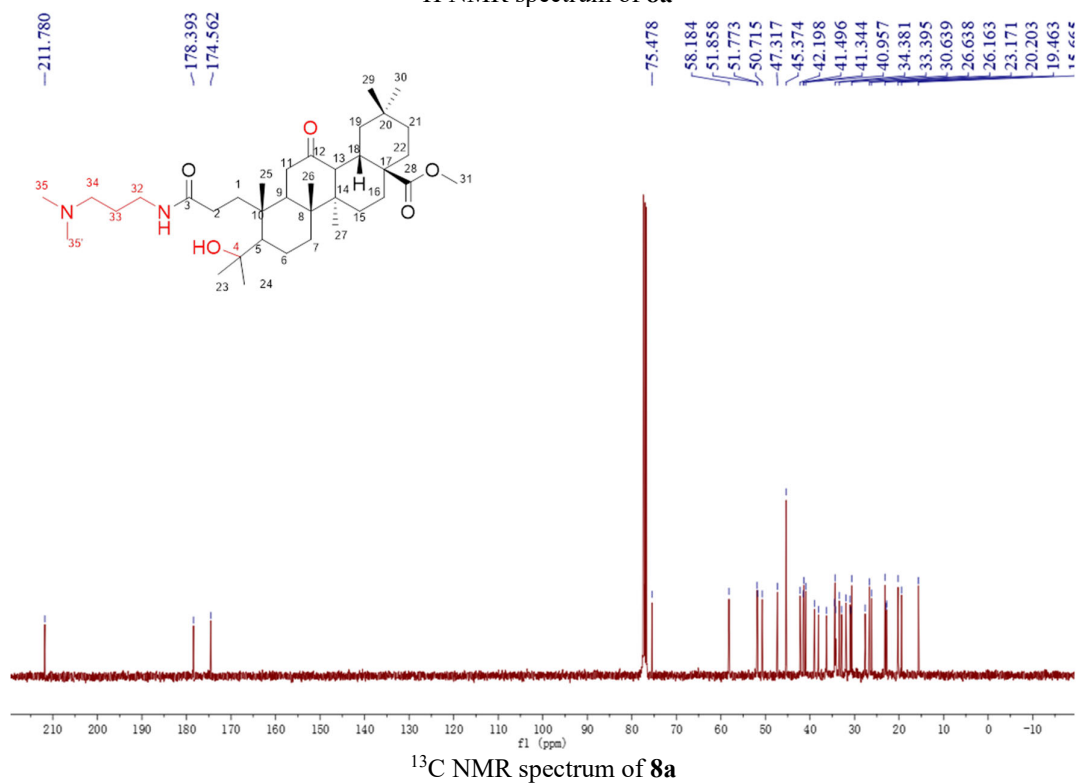

Measured region for 603.4732 m/z

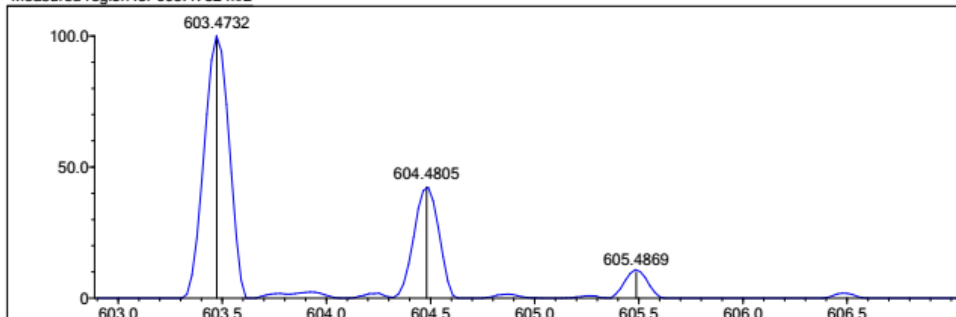

C36 H62 N2 O5 [M+H]<sup>+</sup> : Predicted region for 603.4731 m/z

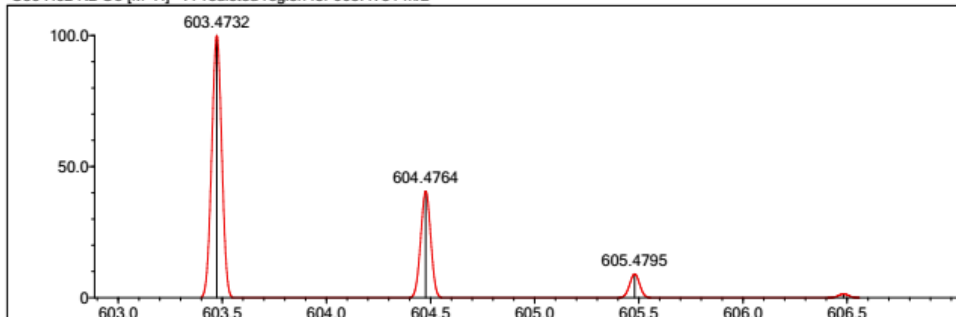

| Rank | Score | Formula (M)   | Ion                | Meas. m/z | Pred. m/z | Df. (mDa) | Df. (ppm) | Iso   | DBE |
|------|-------|---------------|--------------------|-----------|-----------|-----------|-----------|-------|-----|
| 2    | 92.69 | C36 H62 N2 O5 | [M+H] <sup>+</sup> | 603.4732  | 603.4731  | 0.1       | 0.17      | 92.69 | 7.0 |

HRMS spectrum of **8a**

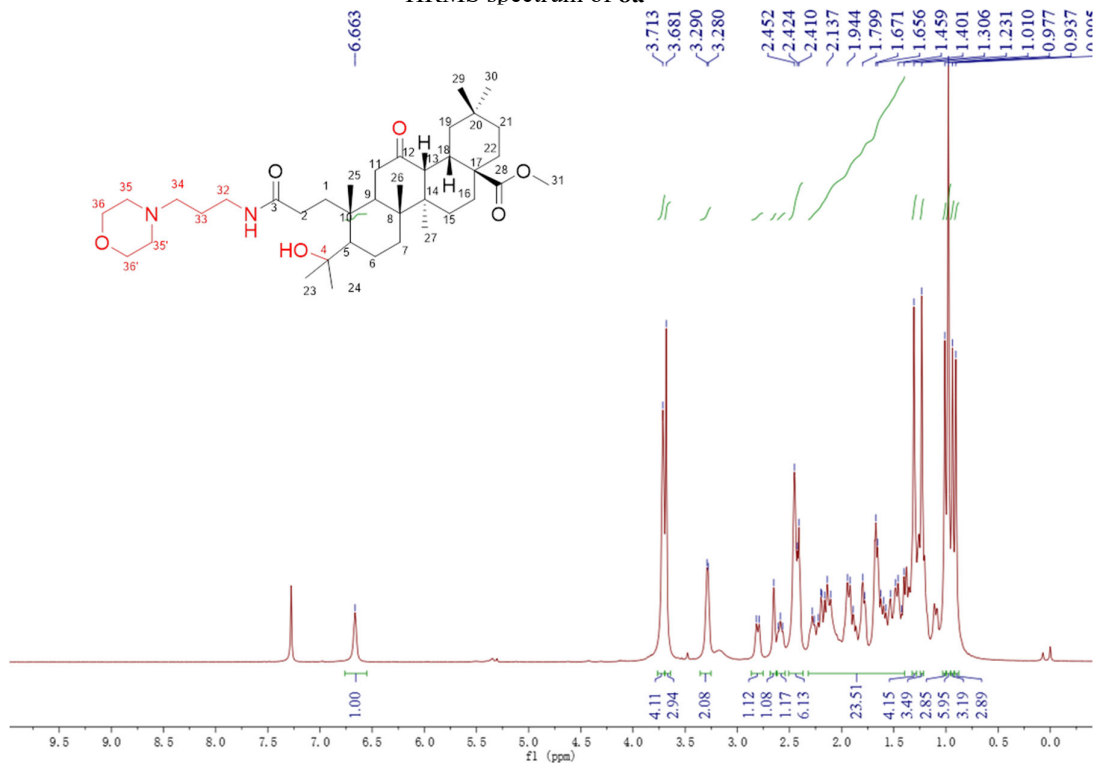

<sup>1</sup>H NMR spectrum of **8b**

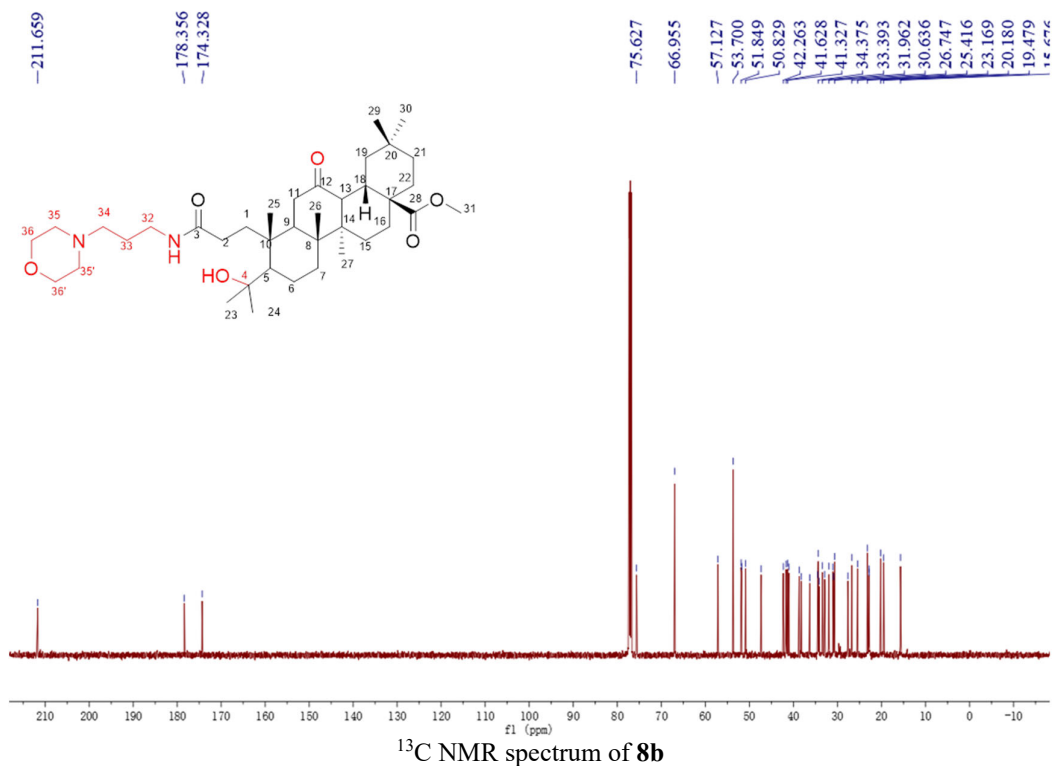

Measured region for 645.4844 m/z

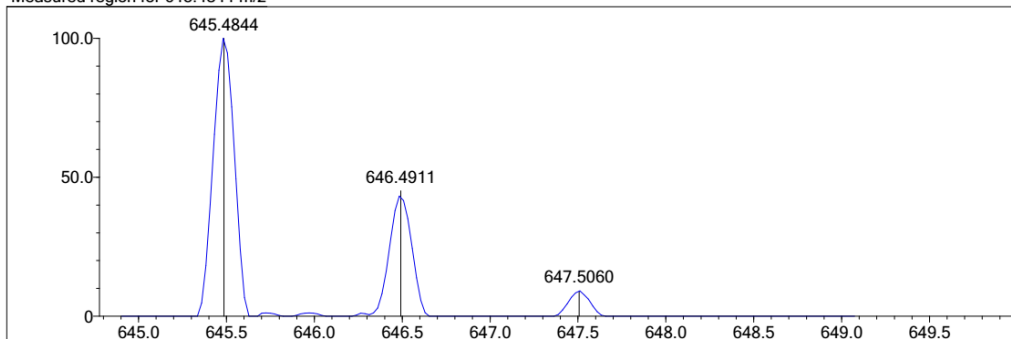

C<sub>38</sub>H<sub>64</sub>N<sub>2</sub>O<sub>6</sub> [M+H]<sup>+</sup> : Predicted region for 645.4837 m/z

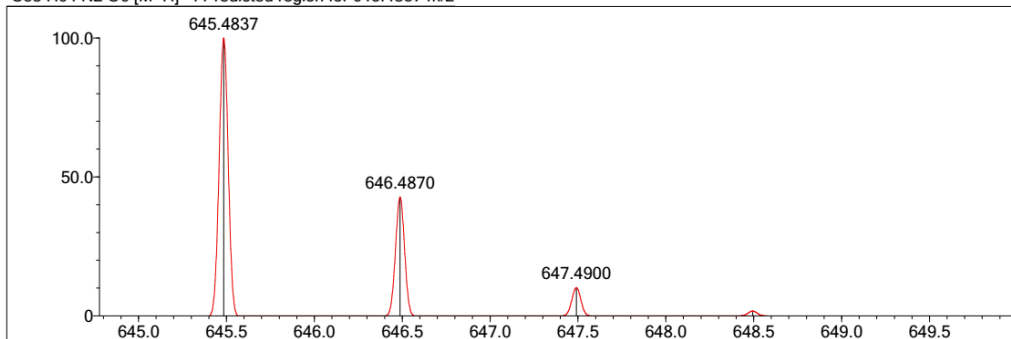

| Rank | Score | Formula (M)                                                   | Ion                | Meas. m/z | Pred. m/z | Df. (mDa) | Df. (ppm) | Iso   | DBE |
|------|-------|---------------------------------------------------------------|--------------------|-----------|-----------|-----------|-----------|-------|-----|
| 2    | 88.24 | C <sub>38</sub> H <sub>64</sub> N <sub>2</sub> O <sub>6</sub> | [M+H] <sup>+</sup> | 645.4844  | 645.4837  | 0.7       | 1.08      | 88.42 | 8.0 |

HRMS spectrum of **8b**

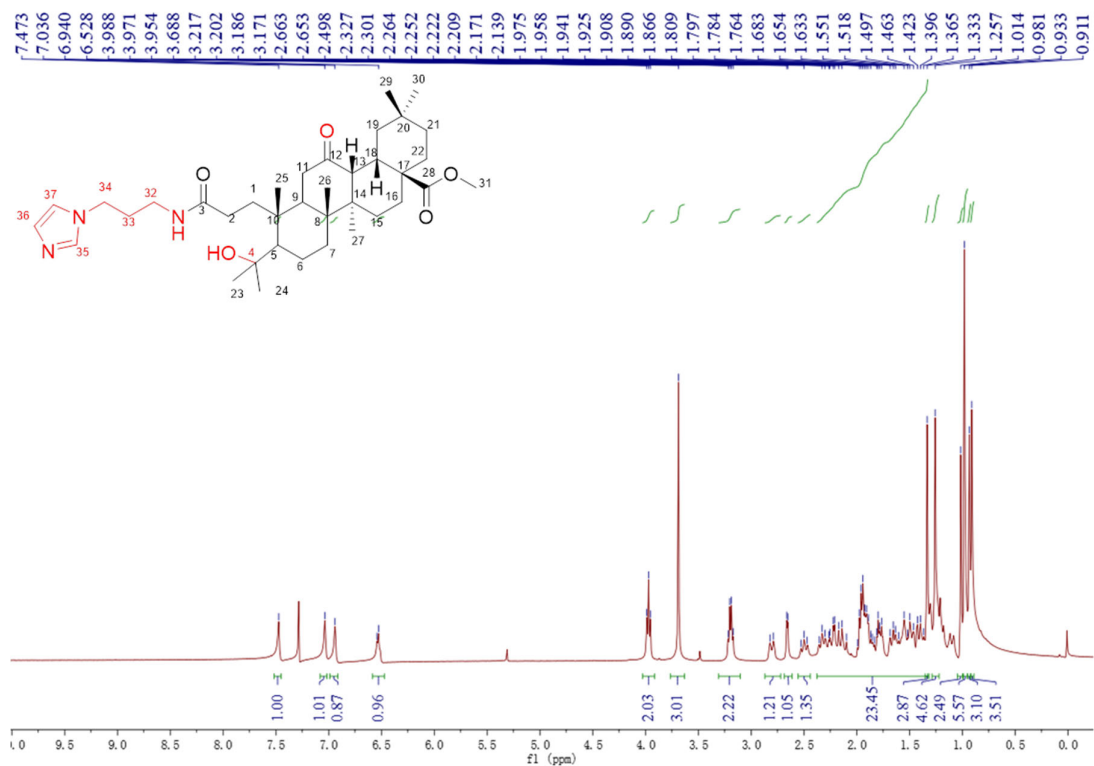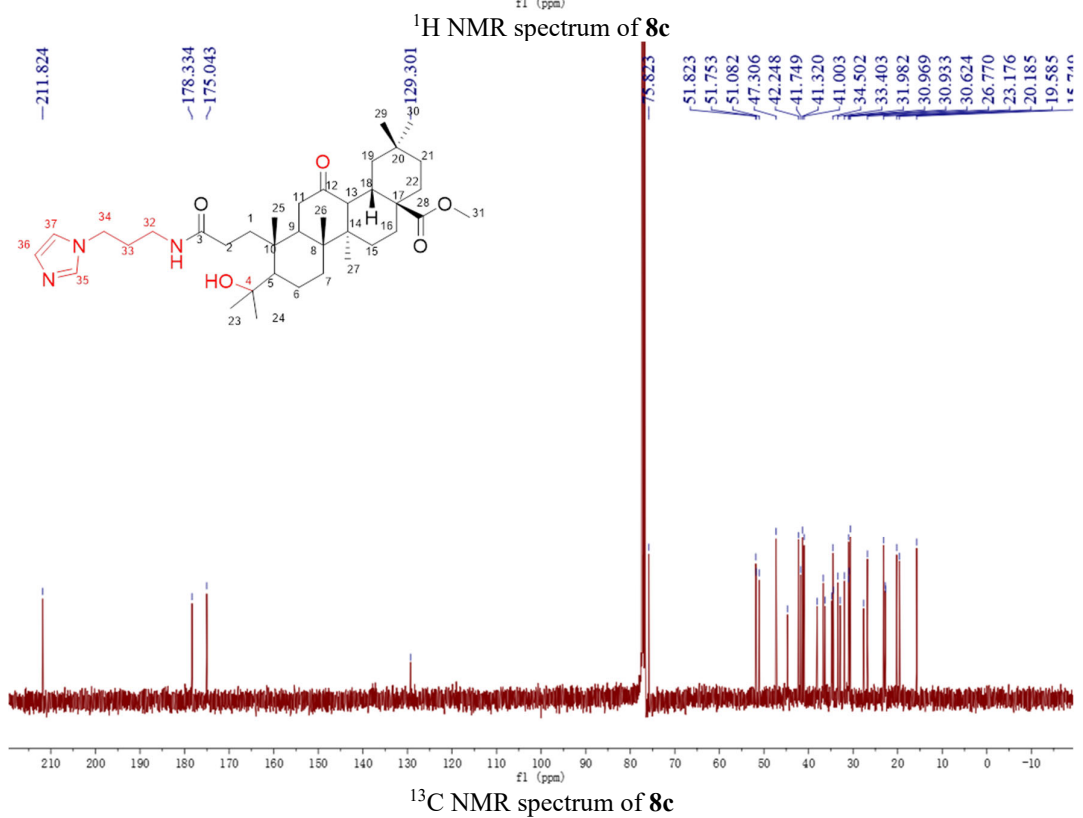

Measured region for 648.4337 m/z

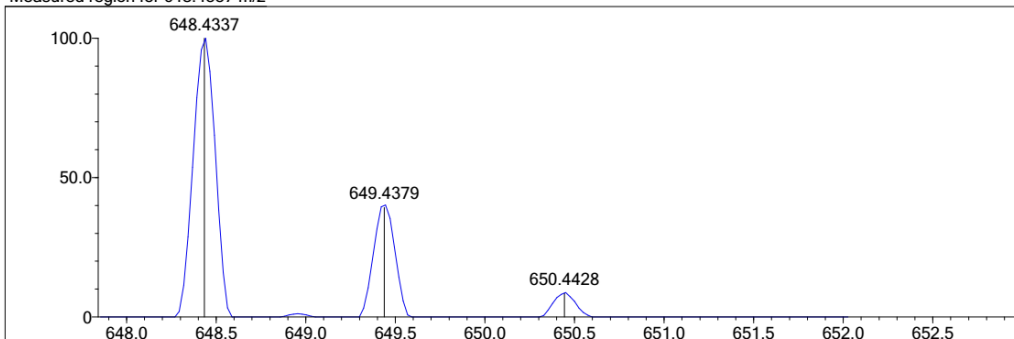

C37 H59 N3 O5 [M+Na]+ : Predicted region for 648.4347 m/z

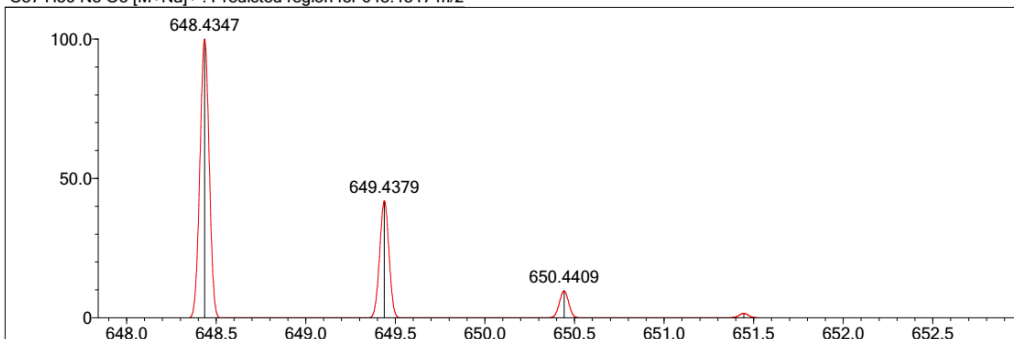

| Rank | Score | Formula (M)   | Ion                 | Meas. m/z | Pred. m/z | Df. (mDa) | Df. (ppm) | Iso   | DBE  |
|------|-------|---------------|---------------------|-----------|-----------|-----------|-----------|-------|------|
| 4    | 95.25 | C37 H59 N3 O5 | [M+Na] <sup>+</sup> | 648.4337  | 648.4347  | -1.0      | -1.54     | 96.56 | 10.0 |

HRMS spectrum of **8c**

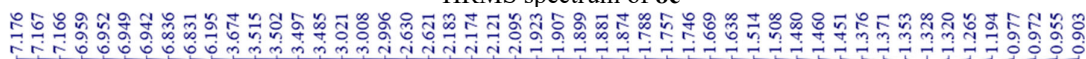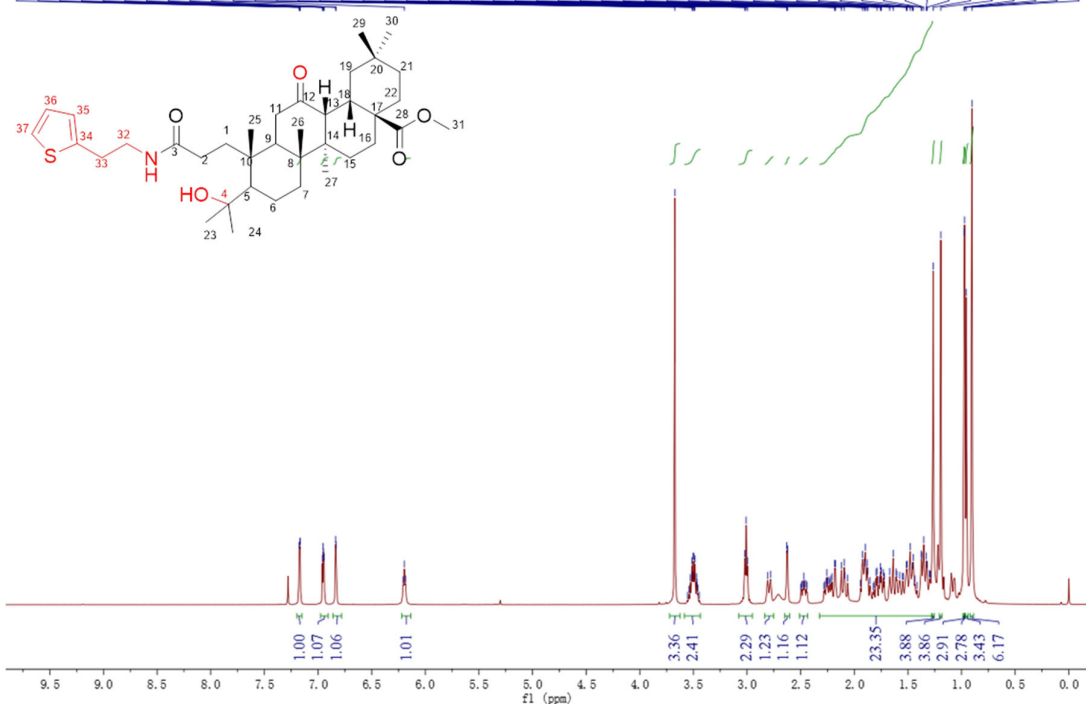

<sup>1</sup>H NMR spectrum of **8d**

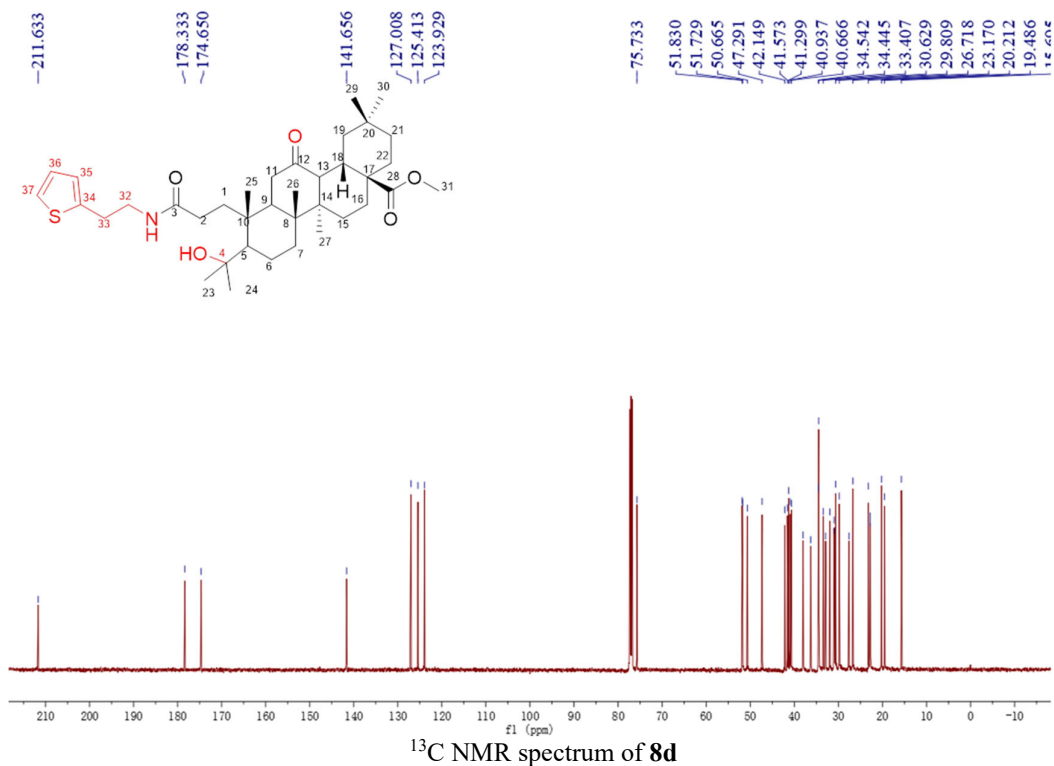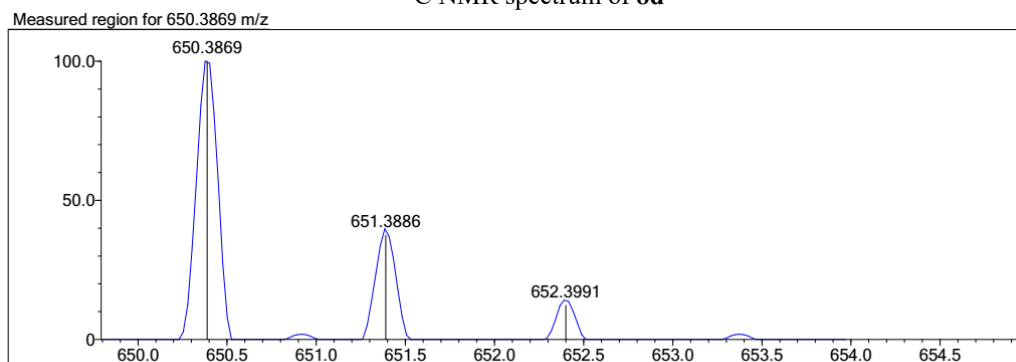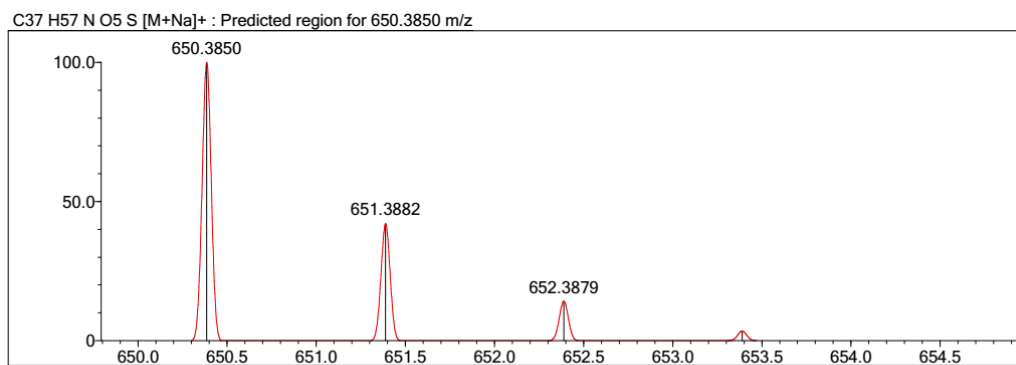

| Rank | Score | Formula (M)    | Ion                 | Meas. m/z | Pred. m/z | Df. (mDa) | Df. (ppm) | Iso   | DBE  |
|------|-------|----------------|---------------------|-----------|-----------|-----------|-----------|-------|------|
| 1    | 75.45 | C37 H57 N O5 S | [M+Na] <sup>+</sup> | 650.3869  | 650.3850  | 1.9       | 2.92      | 79.26 | 10.0 |

HRMS spectrum of 8d



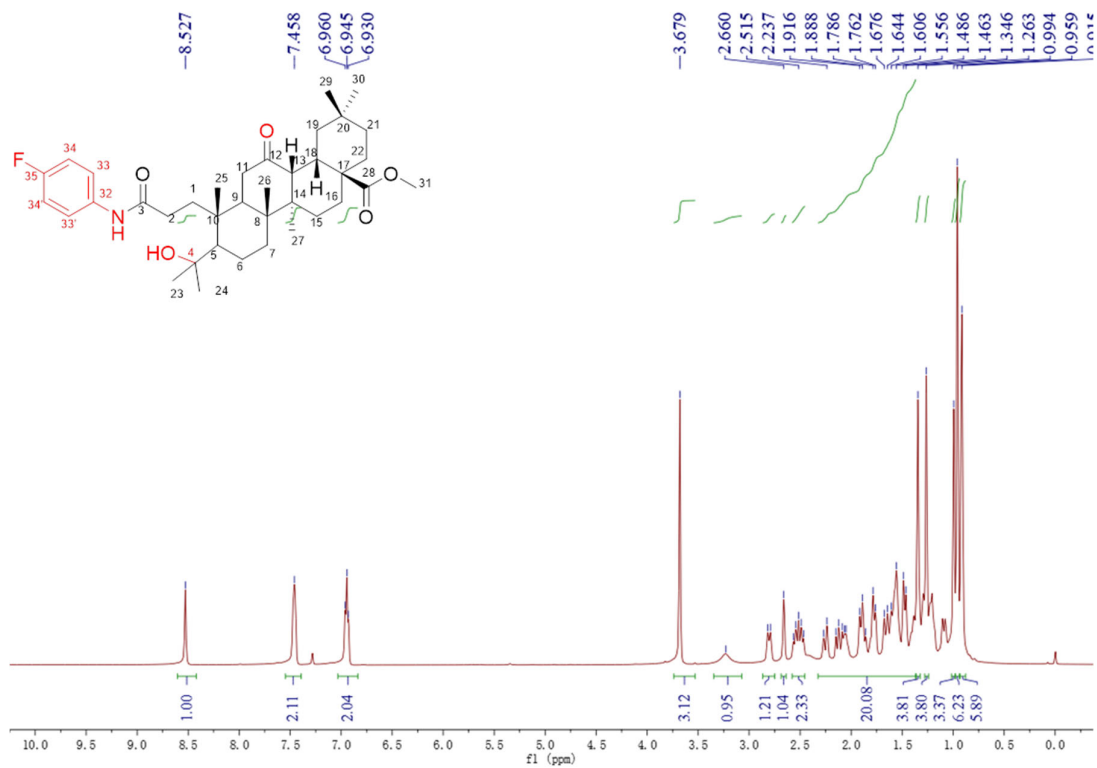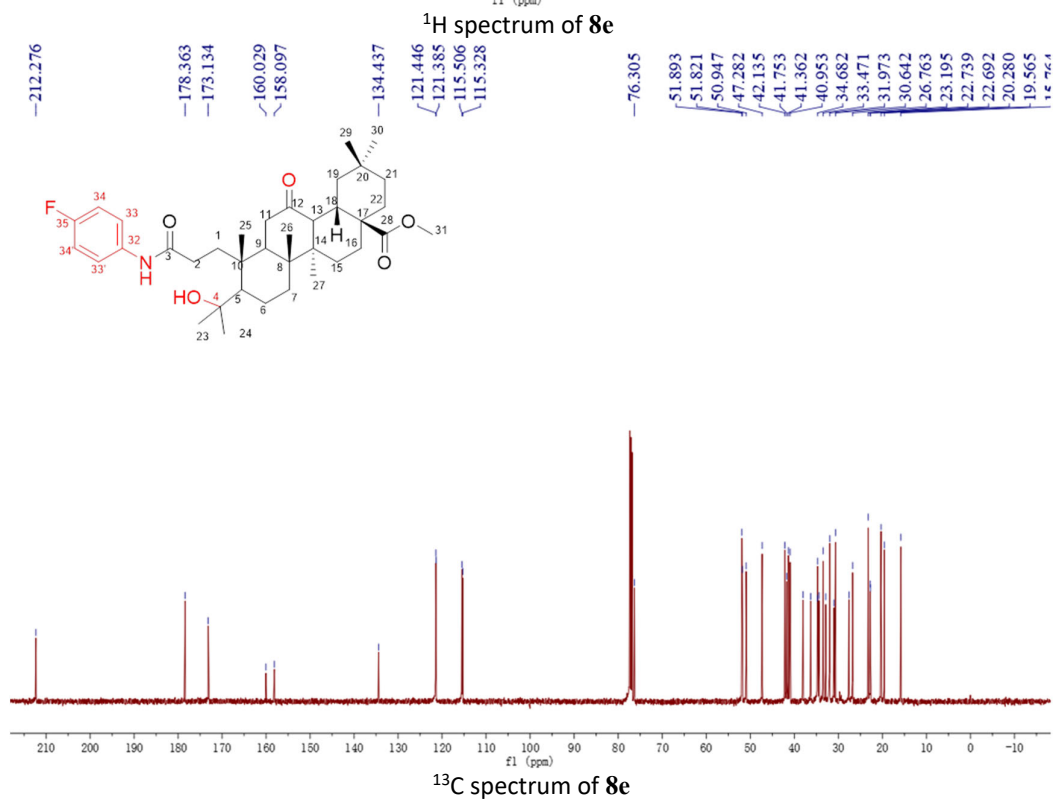

Measured region for 610.3819 m/z

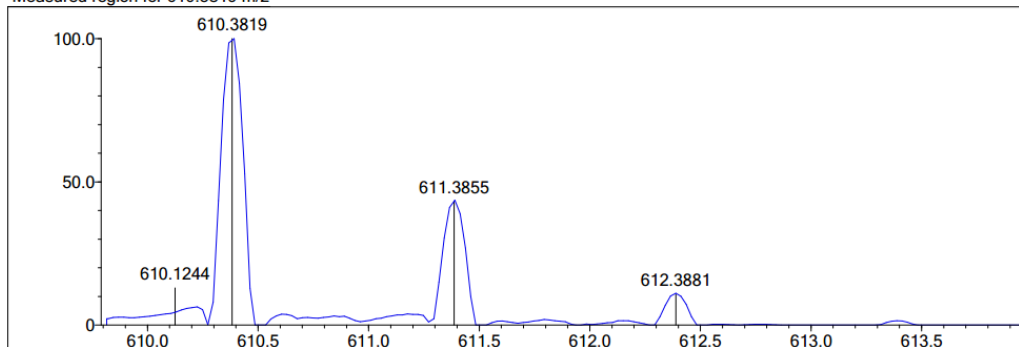

C37 H54 N O5 F [M-H]<sup>-</sup>: Predicted region for 610.3913 m/z

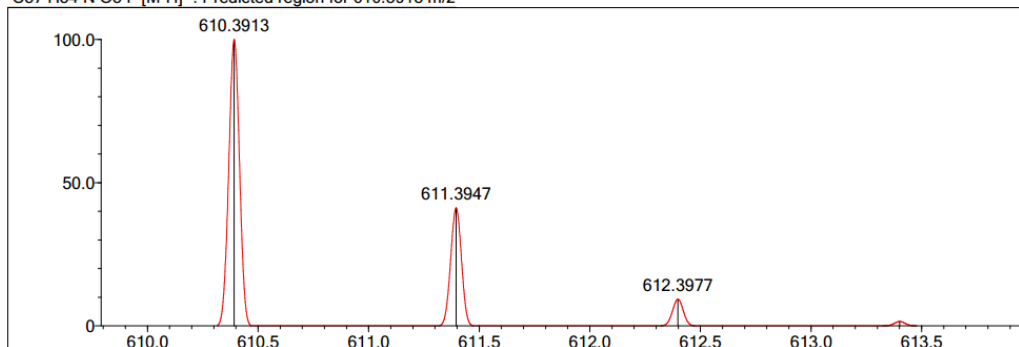

| Rank | Score | Formula (M)    | Ion                | Meas. m/z | Pred. m/z | Df. (mDa) | Df. (ppm) | Iso   | DBE  |
|------|-------|----------------|--------------------|-----------|-----------|-----------|-----------|-------|------|
| 10   | 21.10 | C37 H54 N O5 F | [M-H] <sup>-</sup> | 610.3819  | 610.3913  | -9.4      | -15.40    | 82.43 | 11.0 |

HRMS spectrum of **8e**

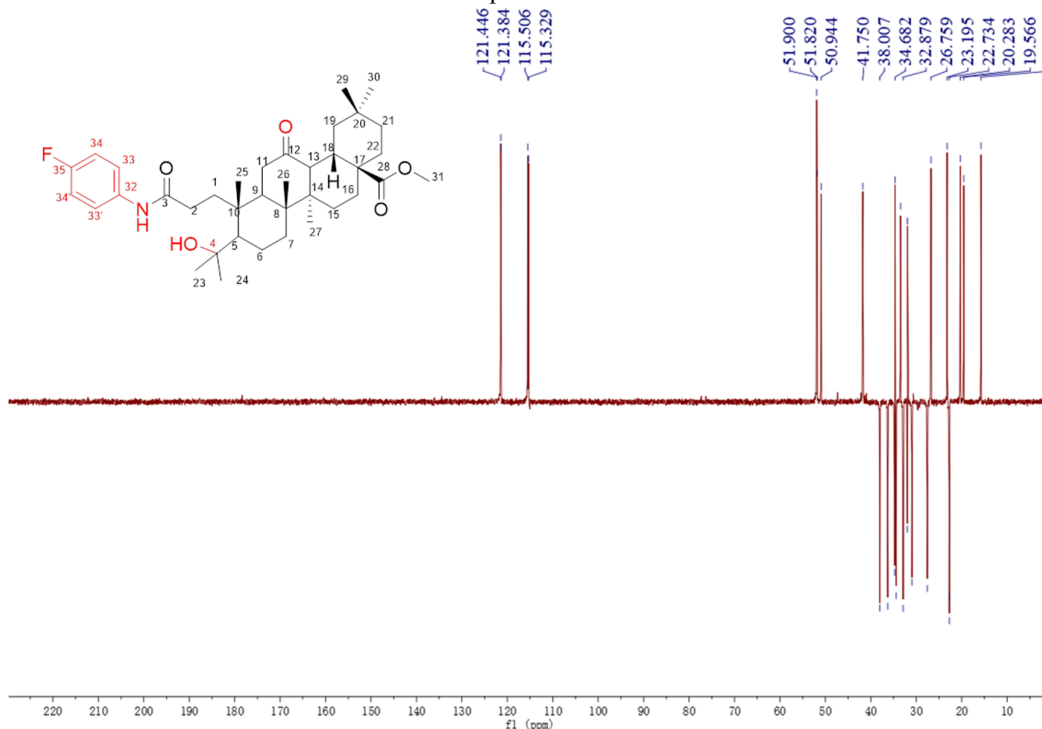

DEPT135 spectrum of **8e**

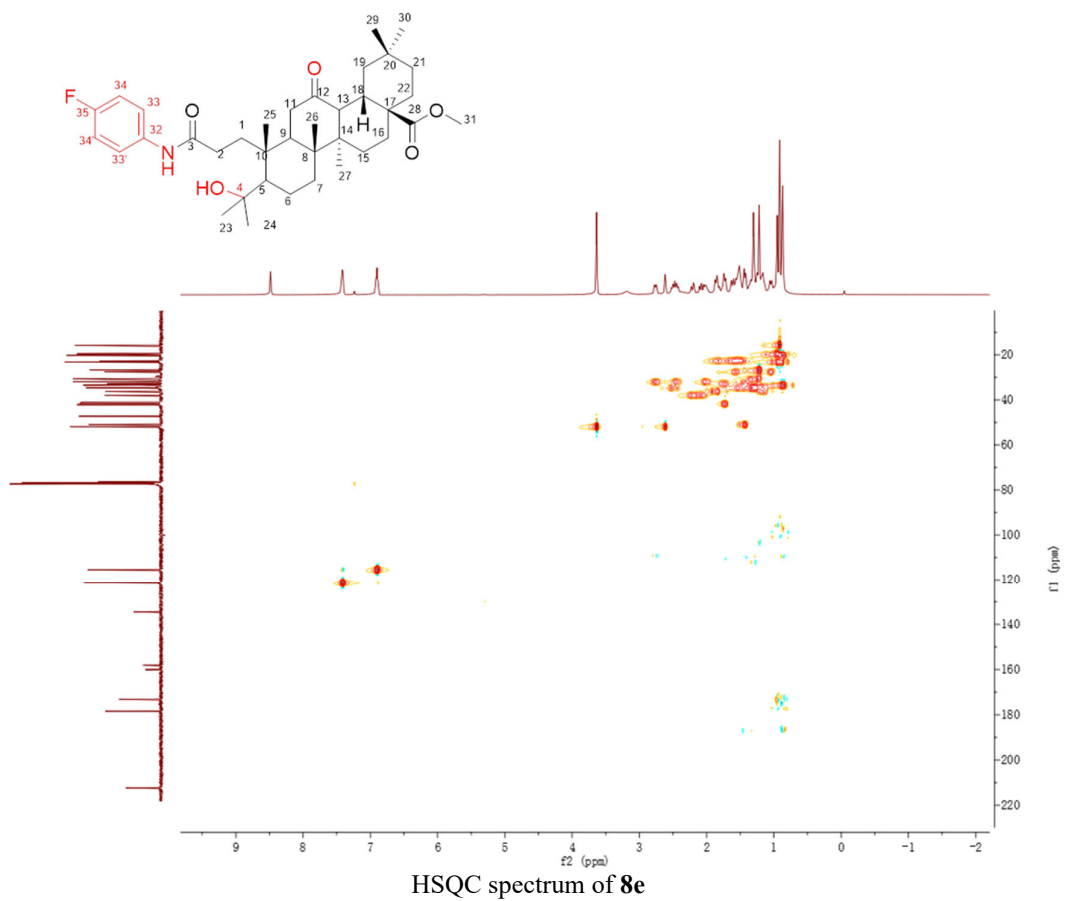

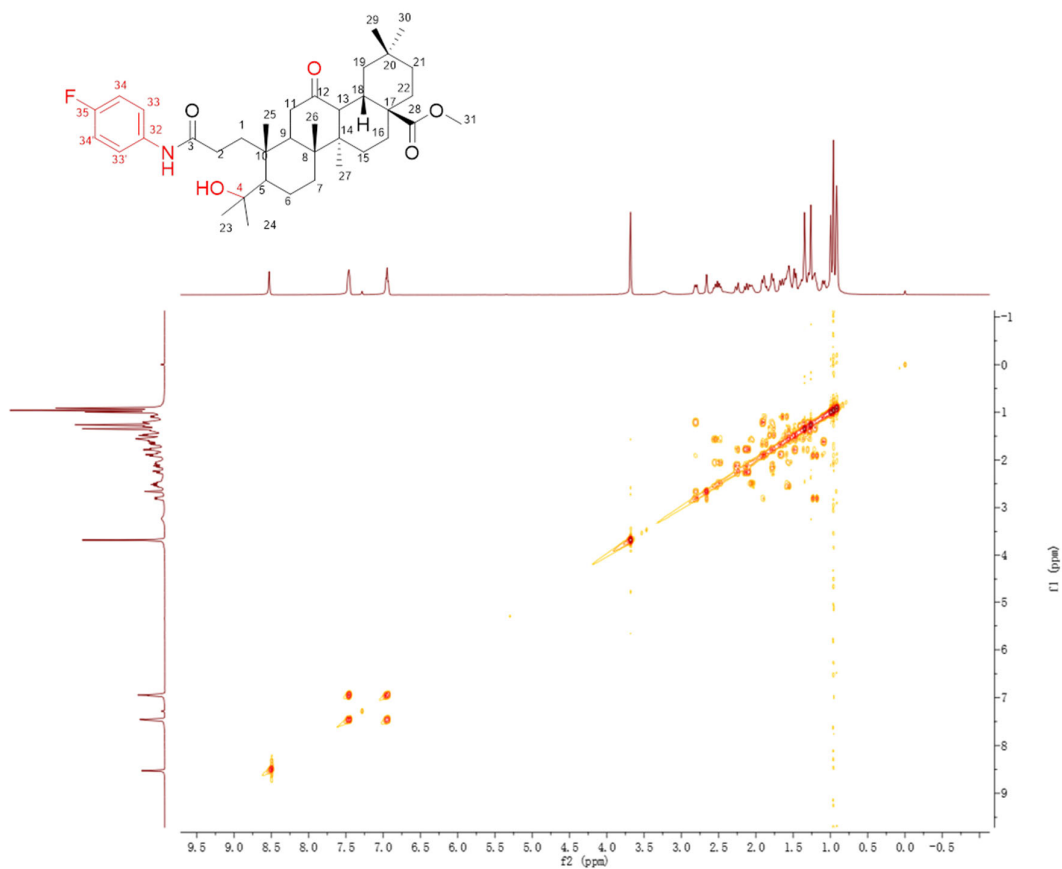

H,H-Cosy spectrum of **8e**

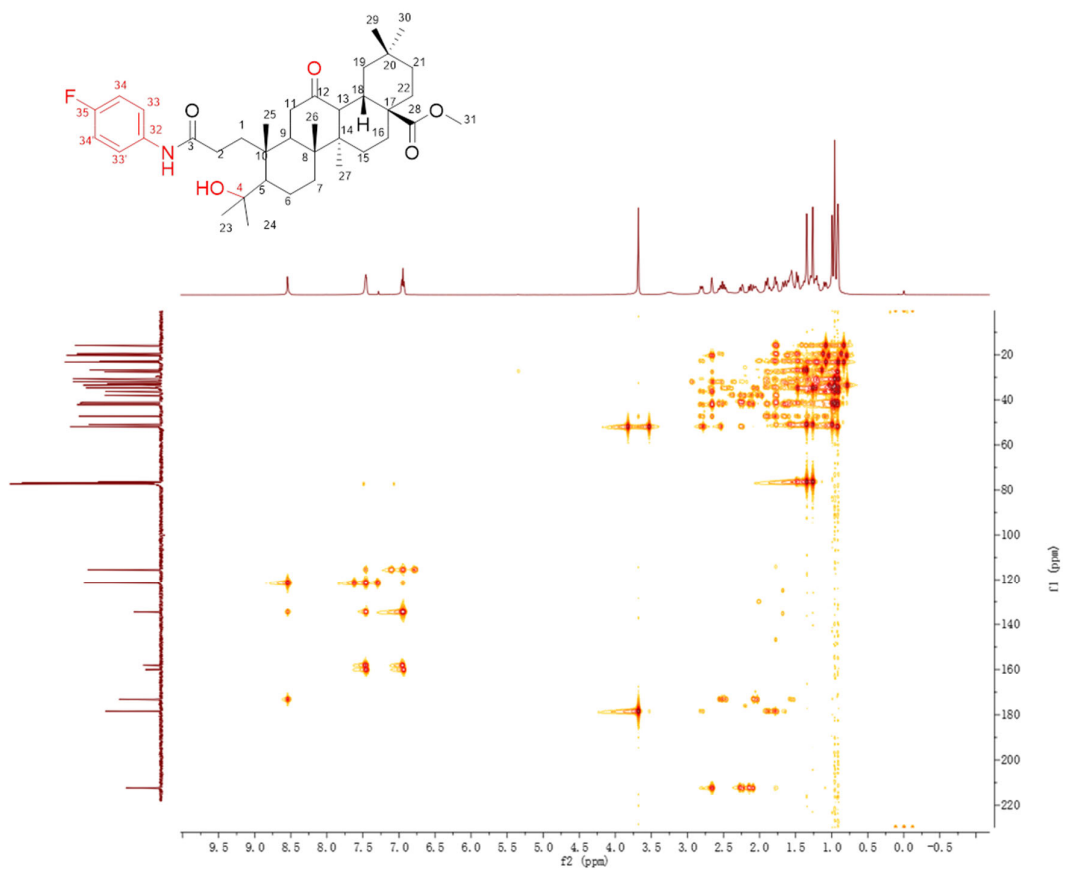

HMBC spectrum of **8e**

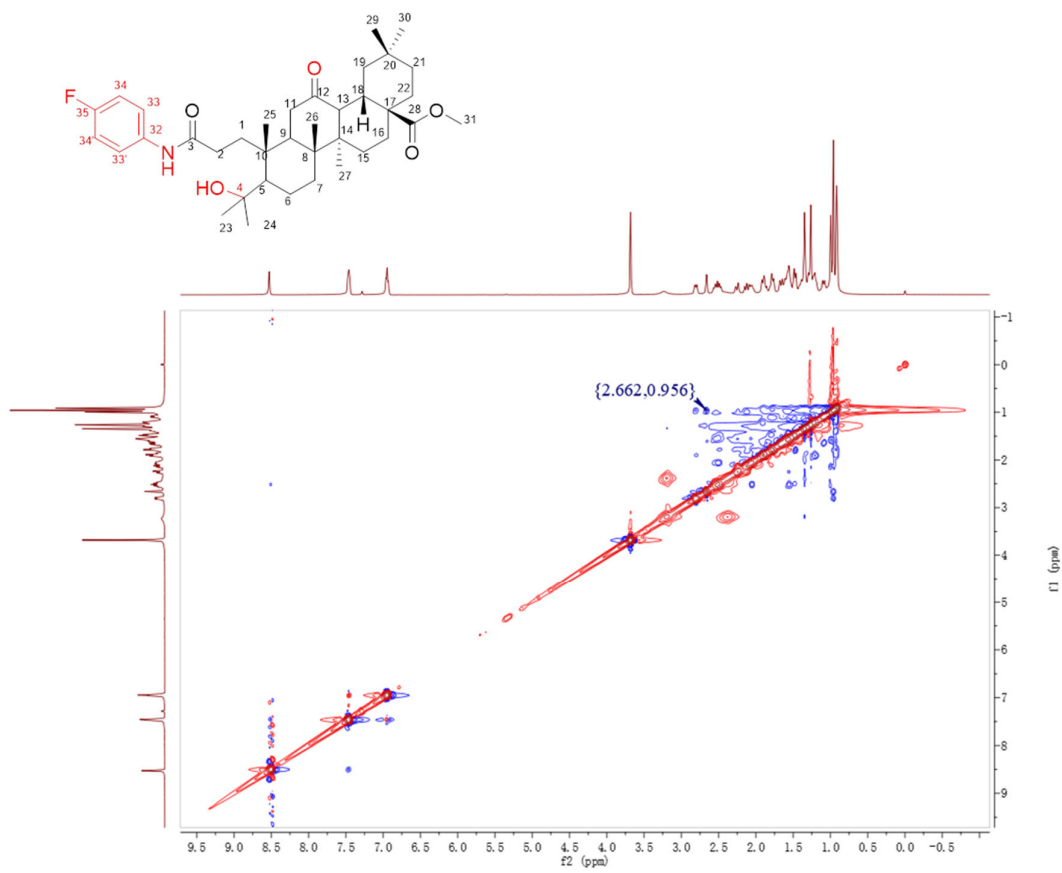

NOE spectrum of **8e**

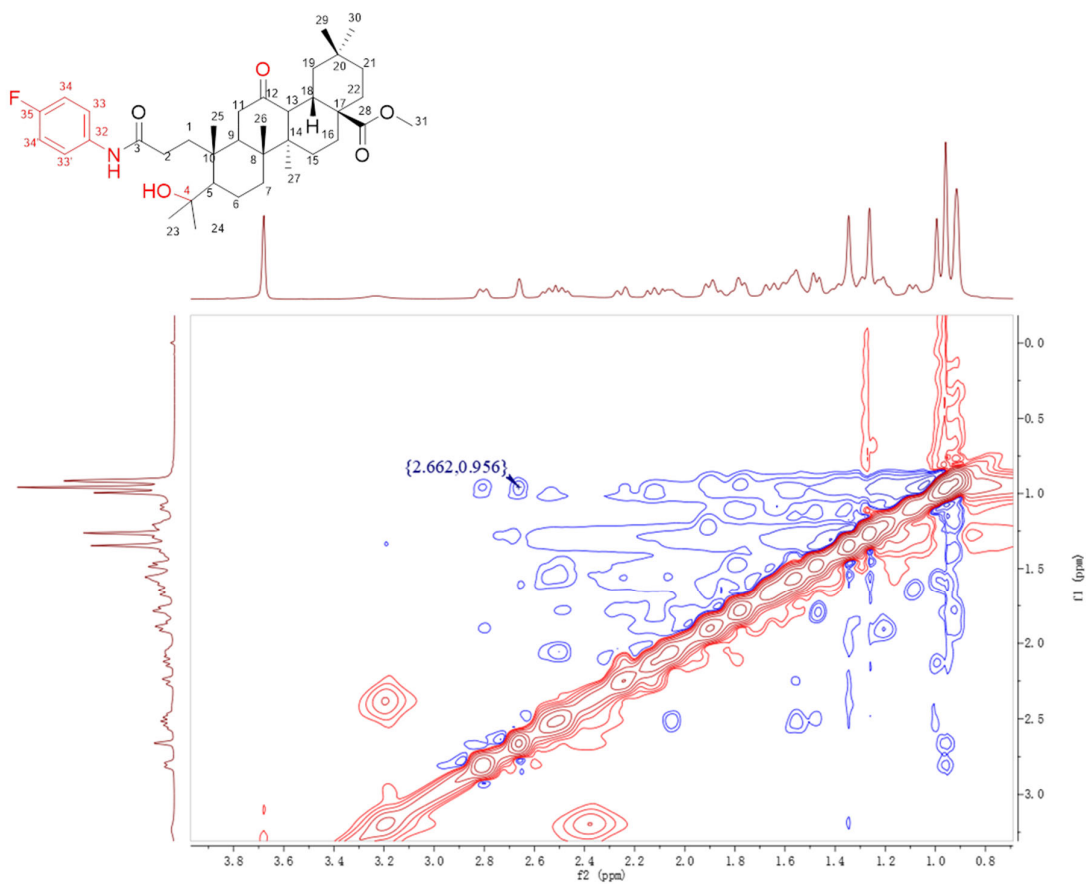

HMBC local zoom spectrum of **8e**

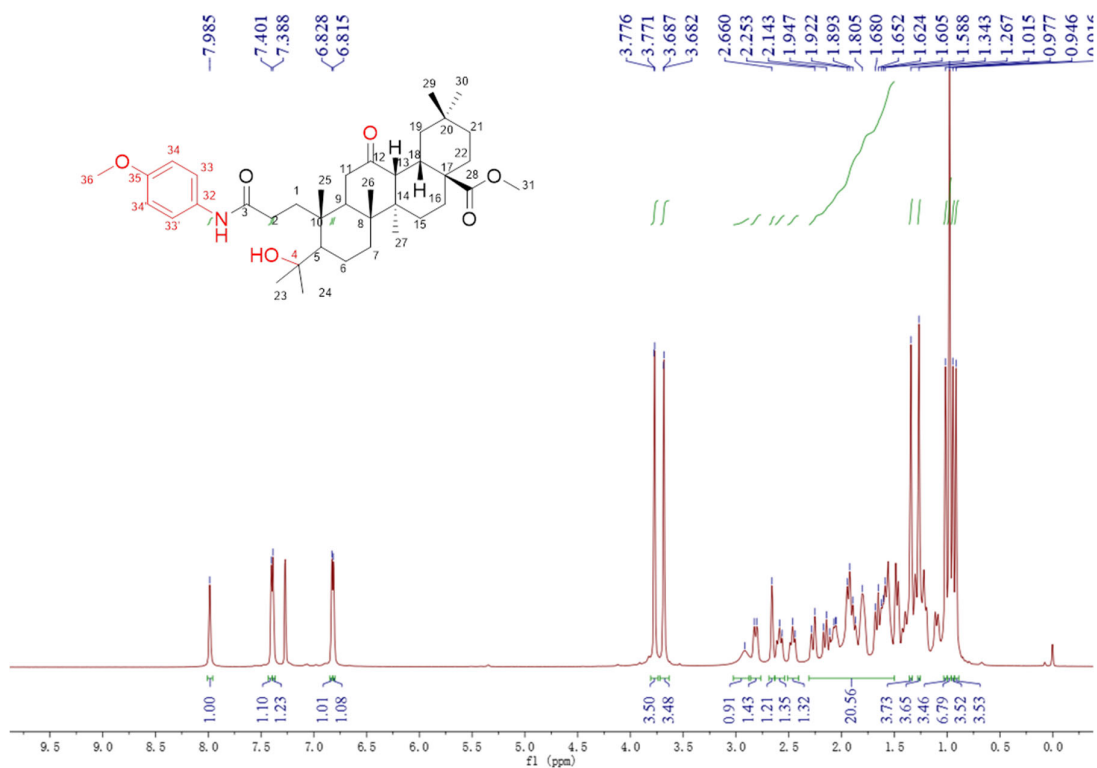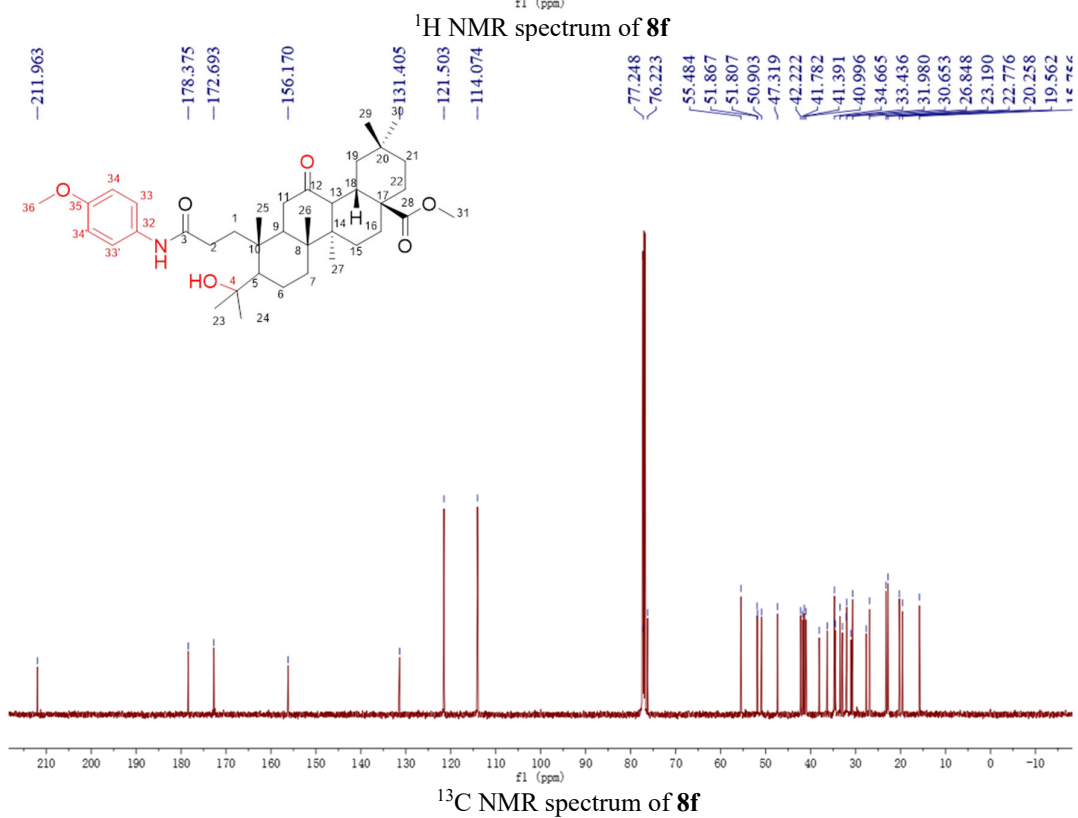



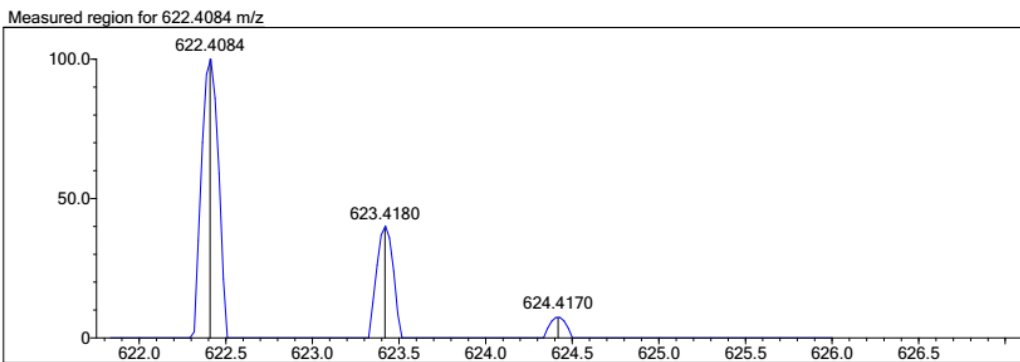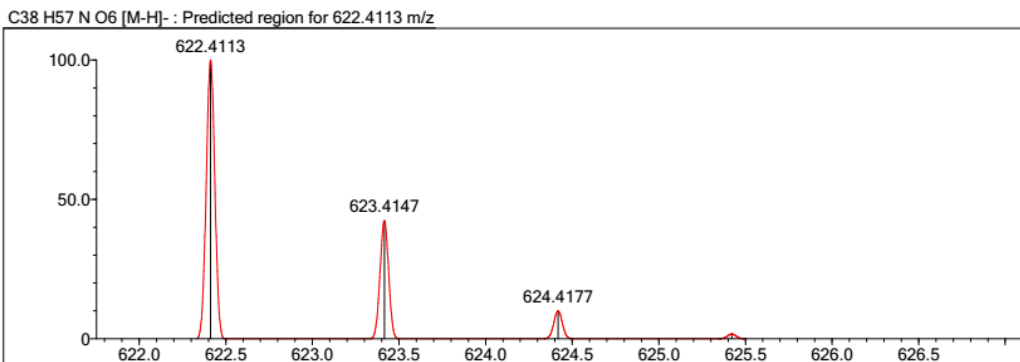

| Rank | Score | Formula (M)  | Ion                | Meas. m/z | Pred. m/z | Df. (mDa) | Df. (ppm) | Iso   | DBE  |
|------|-------|--------------|--------------------|-----------|-----------|-----------|-----------|-------|------|
| 12   | 83.45 | C38 H57 N O6 | [M-H] <sup>-</sup> | 622.4084  | 622.4113  | -2.9      | -4.66     | 91.85 | 11.0 |

HRMS spectrum of **8f**

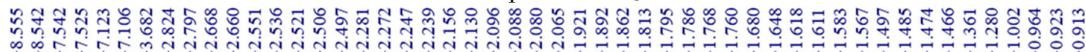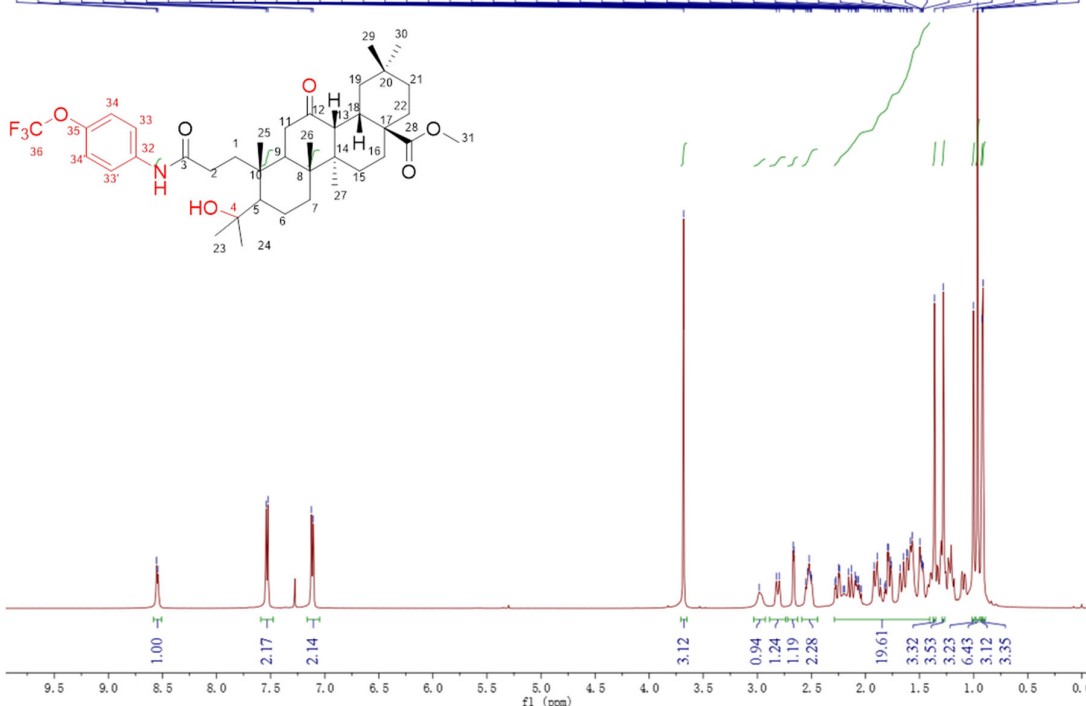

<sup>1</sup>H NMR spectrum of **8g**

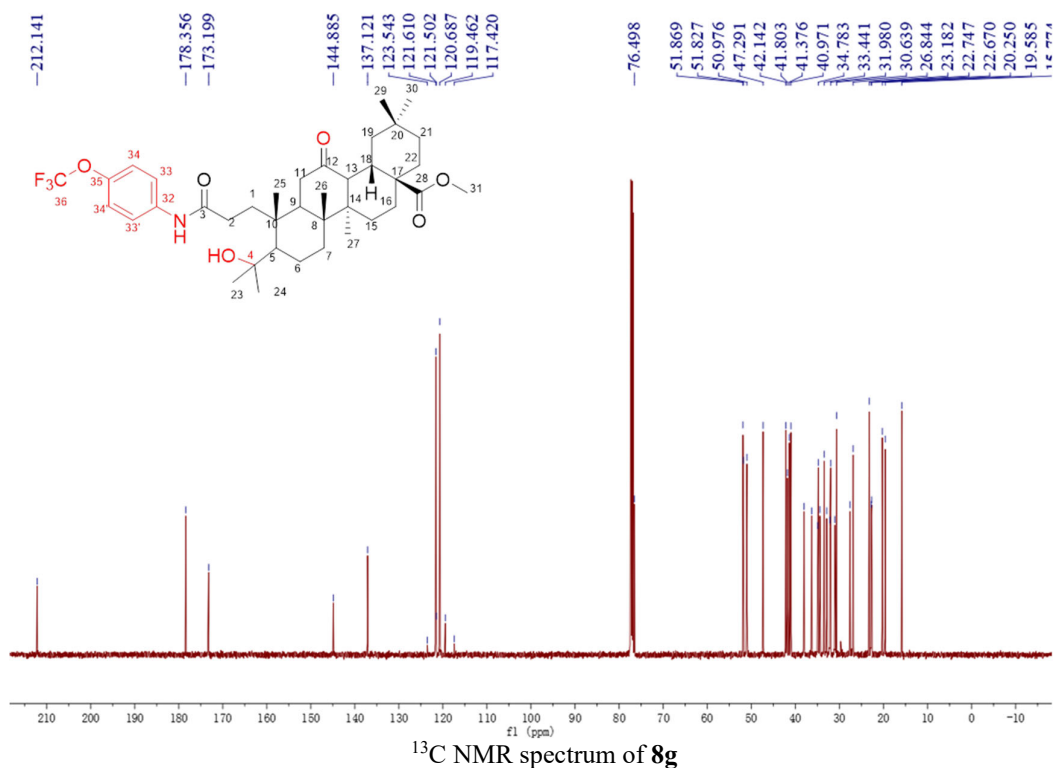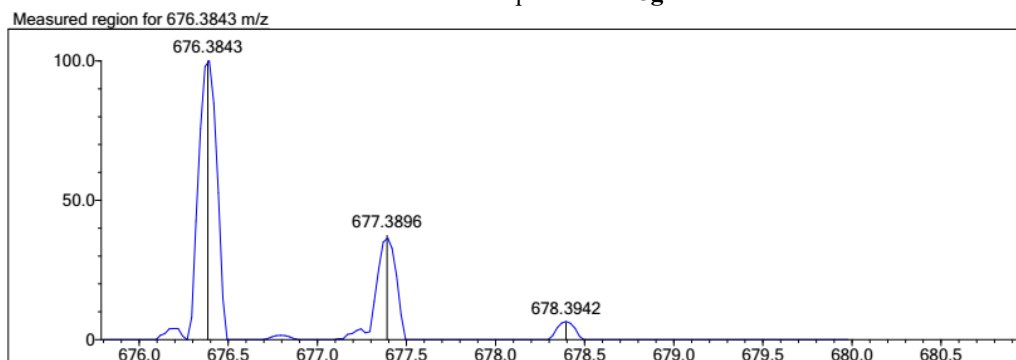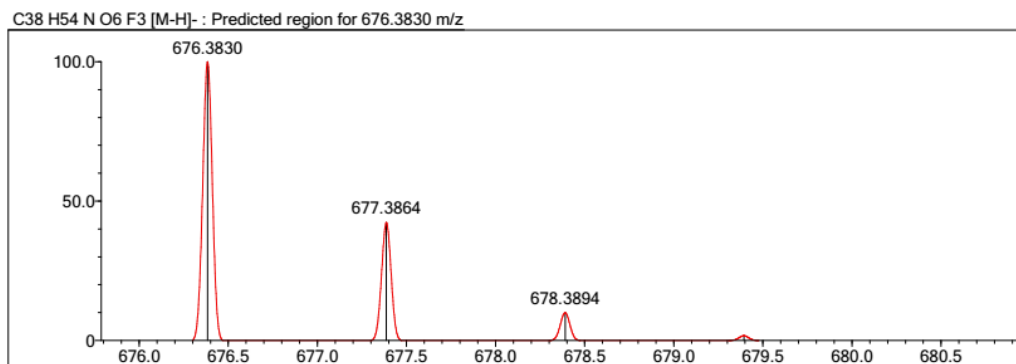

| Rank | Score | Formula (M)     | Ion                | Meas. m/z | Pred. m/z | Df. (mDa) | Df. (ppm) | Iso   | DBE  |
|------|-------|-----------------|--------------------|-----------|-----------|-----------|-----------|-------|------|
| 3    | 76.99 | C38 H54 N O6 F3 | [M-H] <sup>-</sup> | 676.3843  | 676.3830  | 1.3       | 1.92      | 78.80 | 11.0 |

HRMS spectrum of 8g

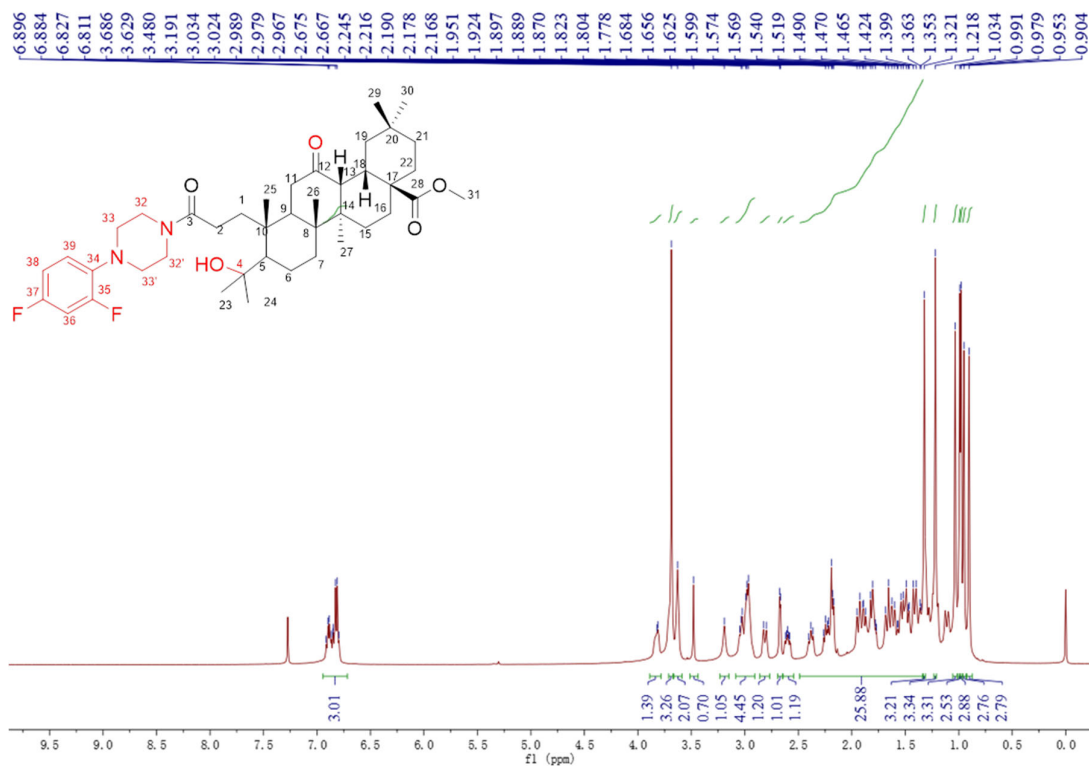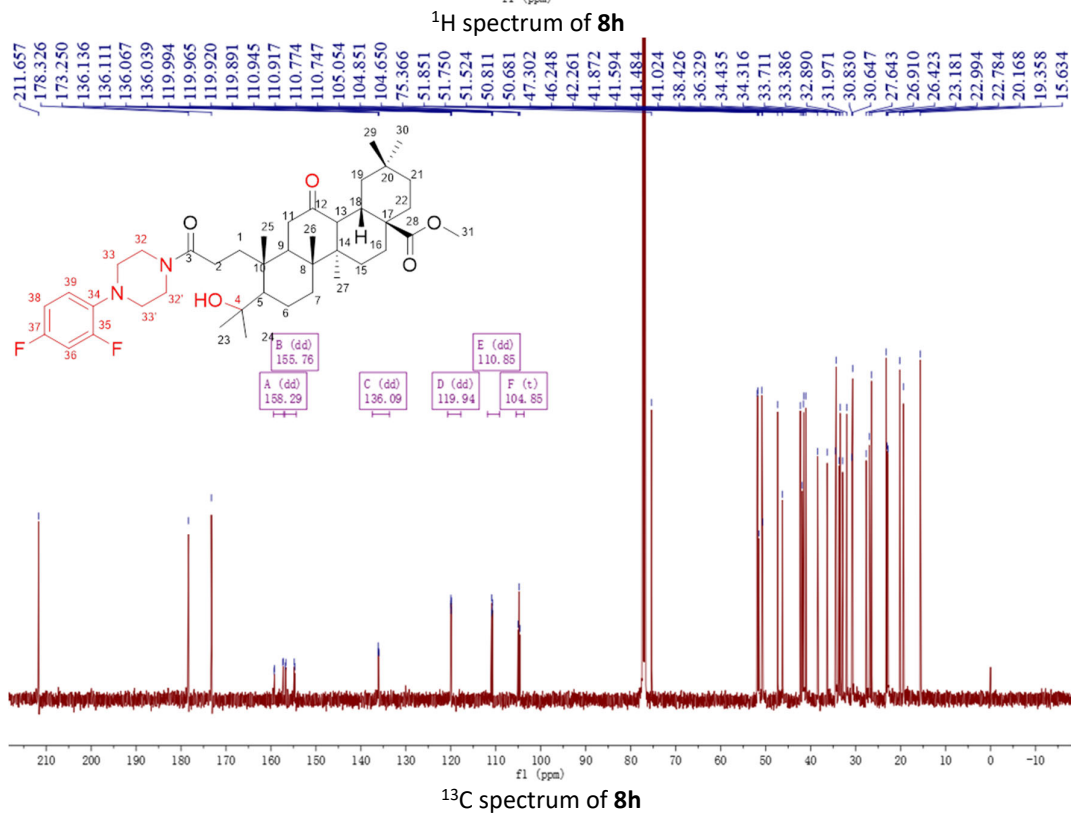

Measured region for 721.4346 m/z

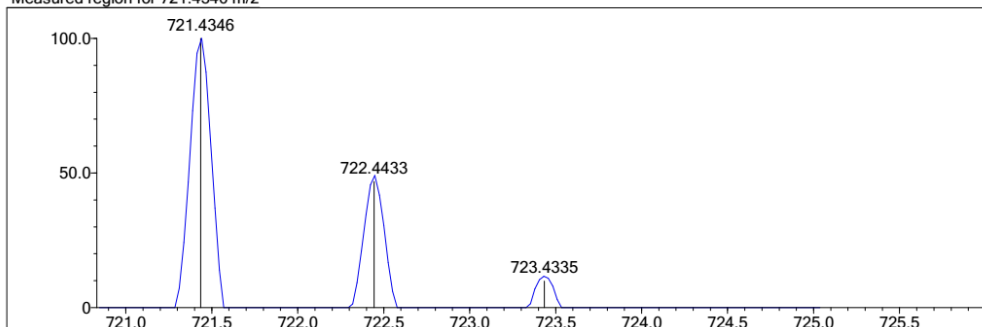

C41 H60 N2 O5 F2 [M+Na]+ : Predicted region for 721.4363 m/z

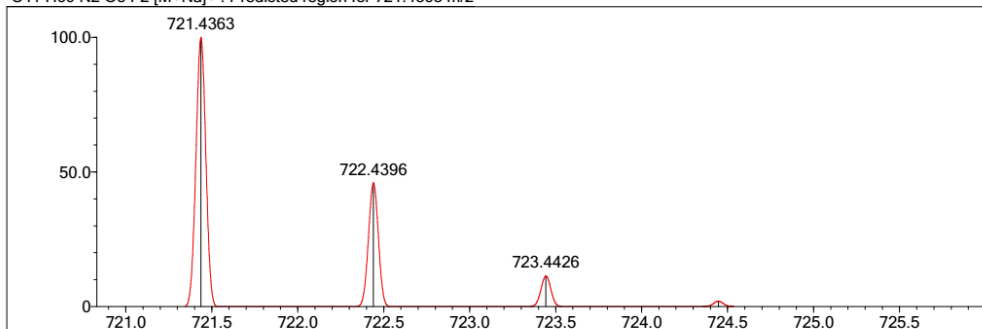

| Rank | Score | Formula (M)      | Ion     | Meas. m/z | Pred. m/z | Df. (mDa) | Df. (ppm) | Iso   | DBE  |
|------|-------|------------------|---------|-----------|-----------|-----------|-----------|-------|------|
| 10   | 92.23 | C41 H60 N2 O5 F2 | [M+Na]+ | 721.4346  | 721.4363  | -1.7      | -2.36     | 95.48 | 12.0 |

HRMS spectrum of **8h**

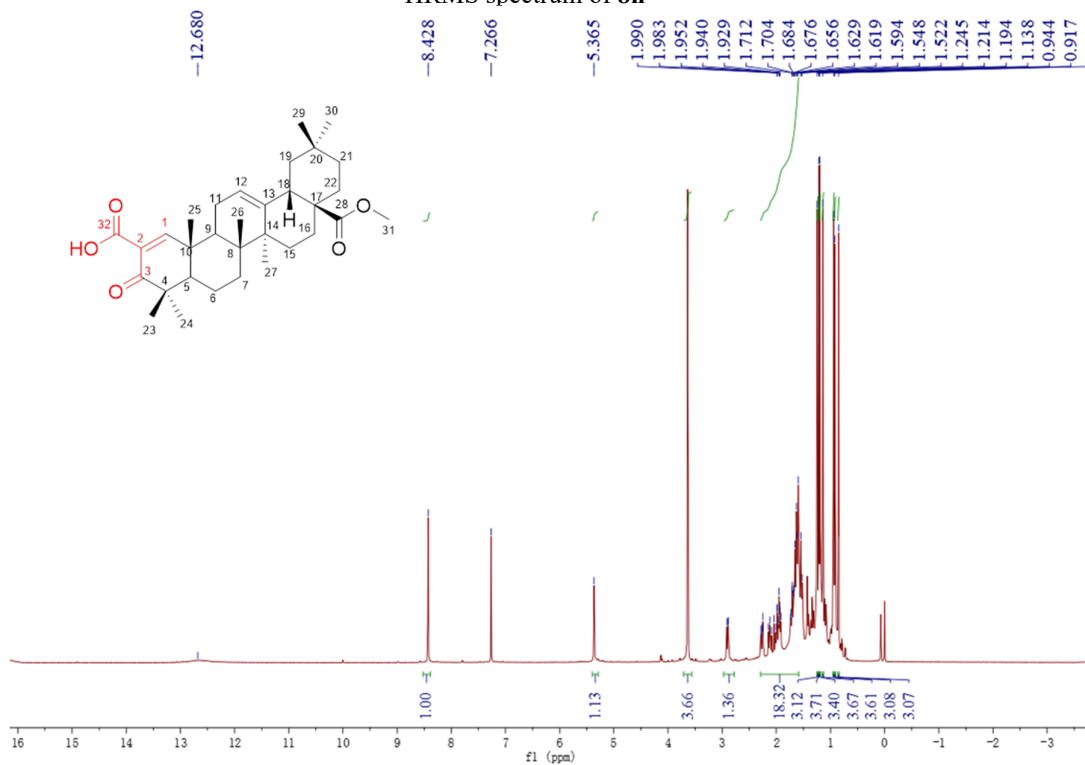

<sup>1</sup>H NMR spectrum of **9**

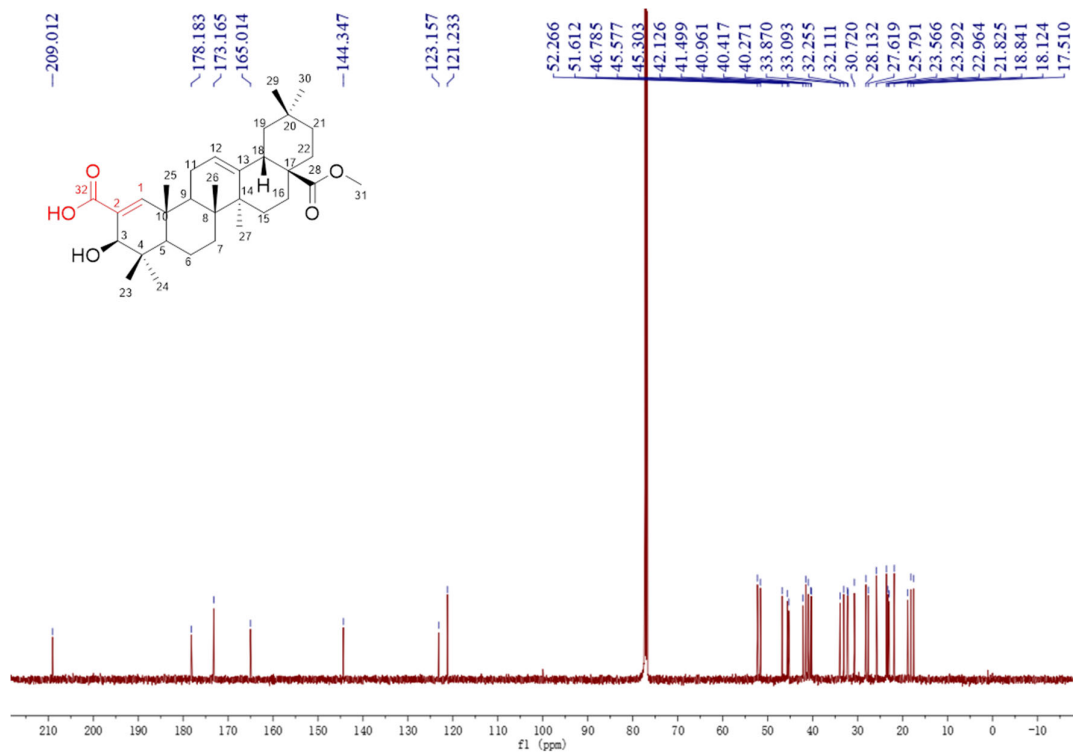

$^{13}\text{C}$  spectrum of 9

Measured region for 533.3236 m/z

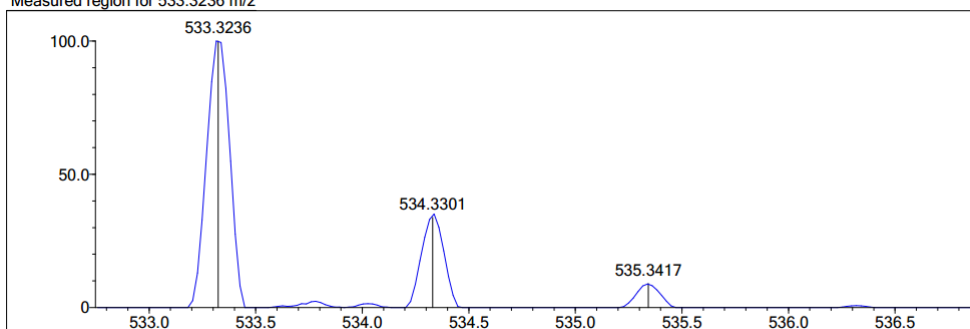

C32 H46 O5 [M+Na]<sup>+</sup>: Predicted region for 533.3237 m/z

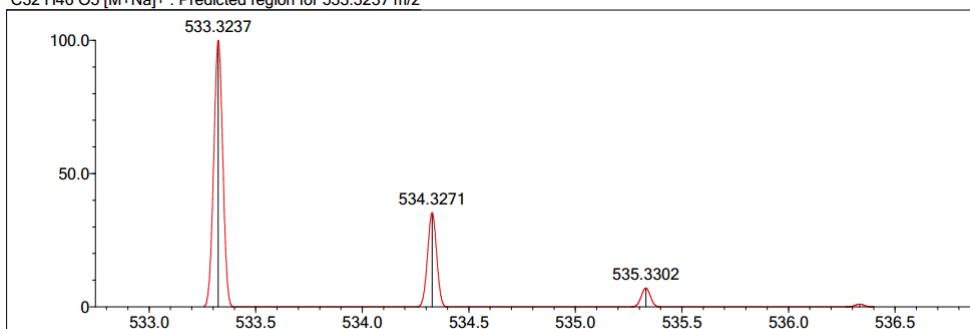

| Rank | Score | Formula (M)                                    | Ion                 | Meas. m/z | Pred. m/z | Df. (mDa) | Df. (ppm) | Iso   | DBE  |
|------|-------|------------------------------------------------|---------------------|-----------|-----------|-----------|-----------|-------|------|
| 1    | 78.65 | C <sub>32</sub> H <sub>46</sub> O <sub>5</sub> | [M+Na] <sup>+</sup> | 533.3236  | 533.3237  | -0.1      | -0.19     | 78.65 | 10.0 |

HRMS spectrum of 9

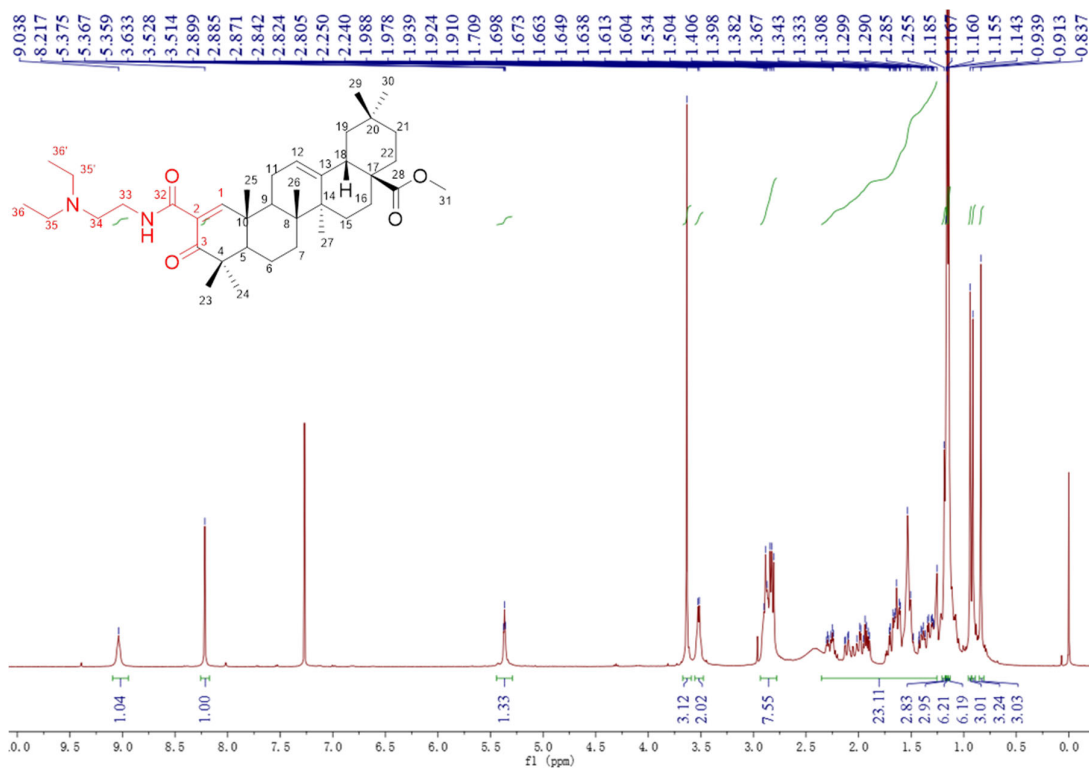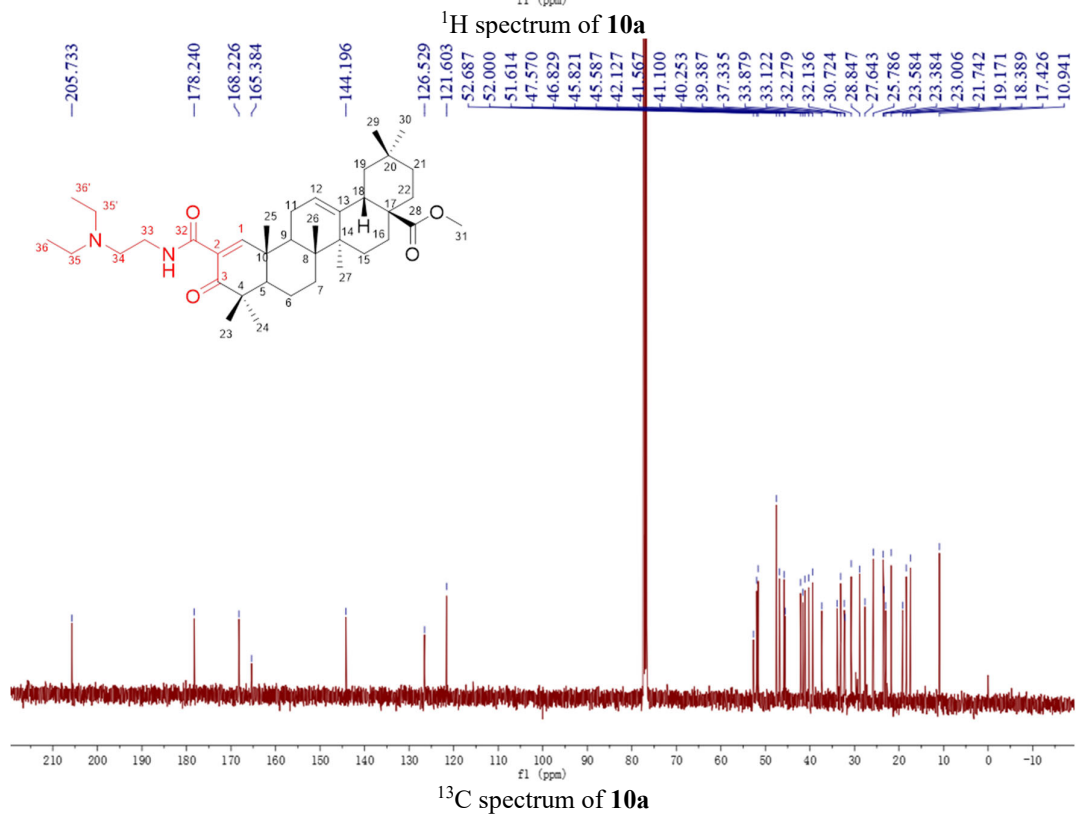

Measured region for 609.4624 m/z

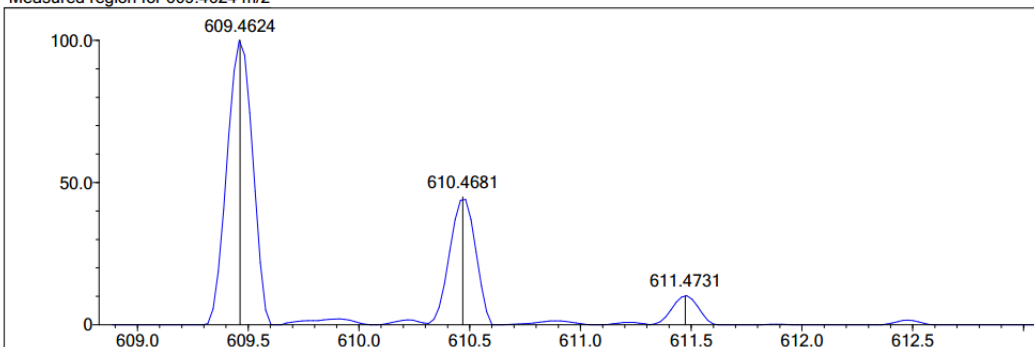

C38 H60 N2 O4 [M+H]<sup>+</sup>: Predicted region for 609.4626 m/z

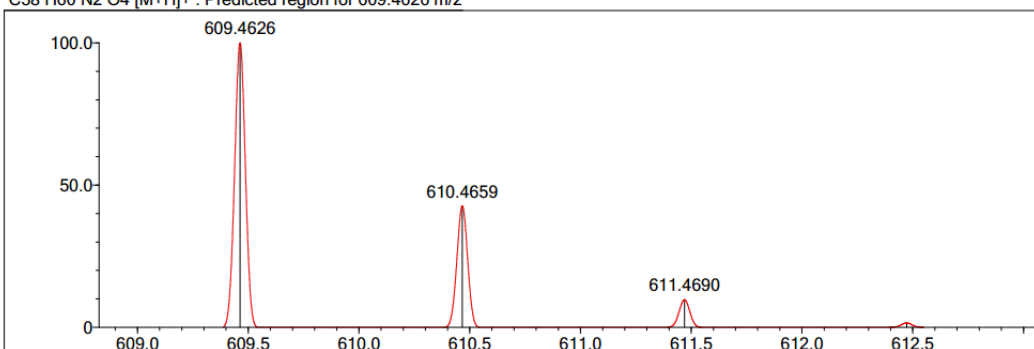

| Rank | Score | Formula (M)   | Ion                | Meas. m/z | Pred. m/z | Df. (mDa) | Df. (ppm) | Iso   | DBE  |
|------|-------|---------------|--------------------|-----------|-----------|-----------|-----------|-------|------|
| 1    | 88.17 | C38 H60 N2 O4 | [M+H] <sup>+</sup> | 609.4624  | 609.4626  | -0.2      | -0.33     | 88.17 | 10.0 |

HRMS spectrum of 10a

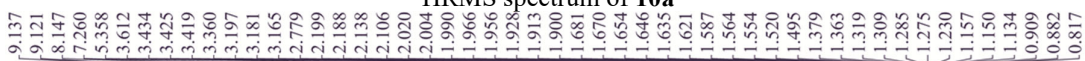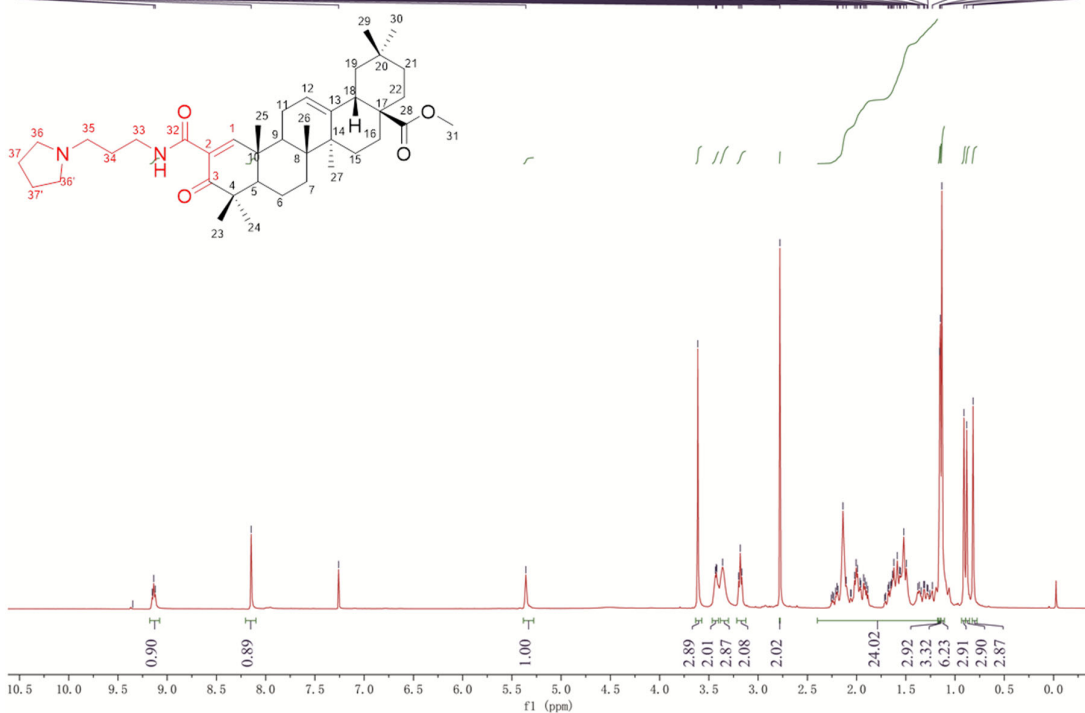

<sup>1</sup>H spectrum of 10b

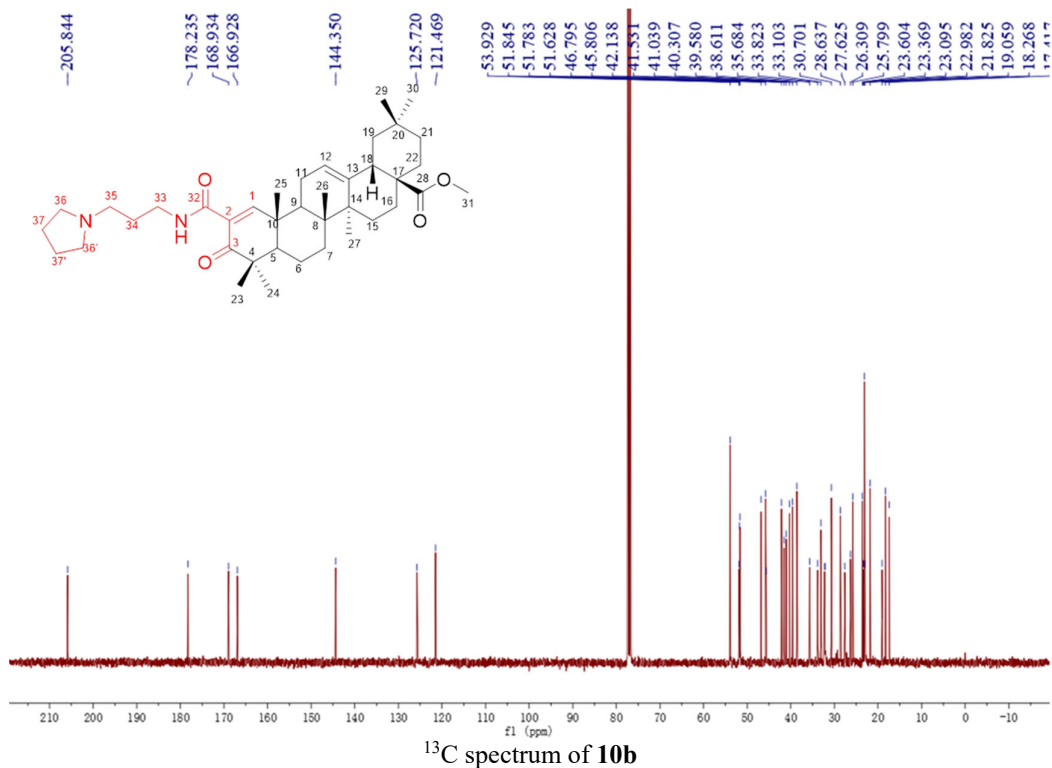

Measured region for 621.4612 m/z

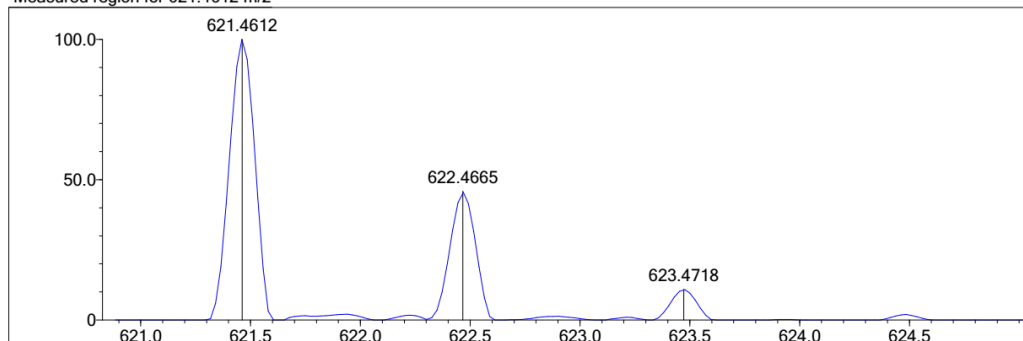

C39 H60 N2 O4 [M+H]<sup>+</sup> : Predicted region for 621.4626 m/z

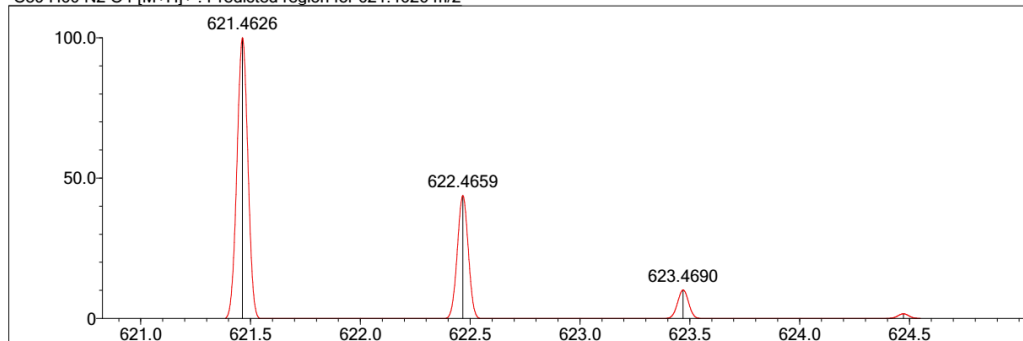

| Rank | Score | Formula (M)   | Ion                | Meas. m/z | Pred. m/z | Df. (mDa) | Df. (ppm) | Iso   | DBE  |
|------|-------|---------------|--------------------|-----------|-----------|-----------|-----------|-------|------|
| 1    | 87.53 | C39 H60 N2 O4 | [M+H] <sup>+</sup> | 621.4612  | 621.4626  | -1.4      | -2.25     | 90.36 | 11.0 |

HRMS spectrum of **10b**



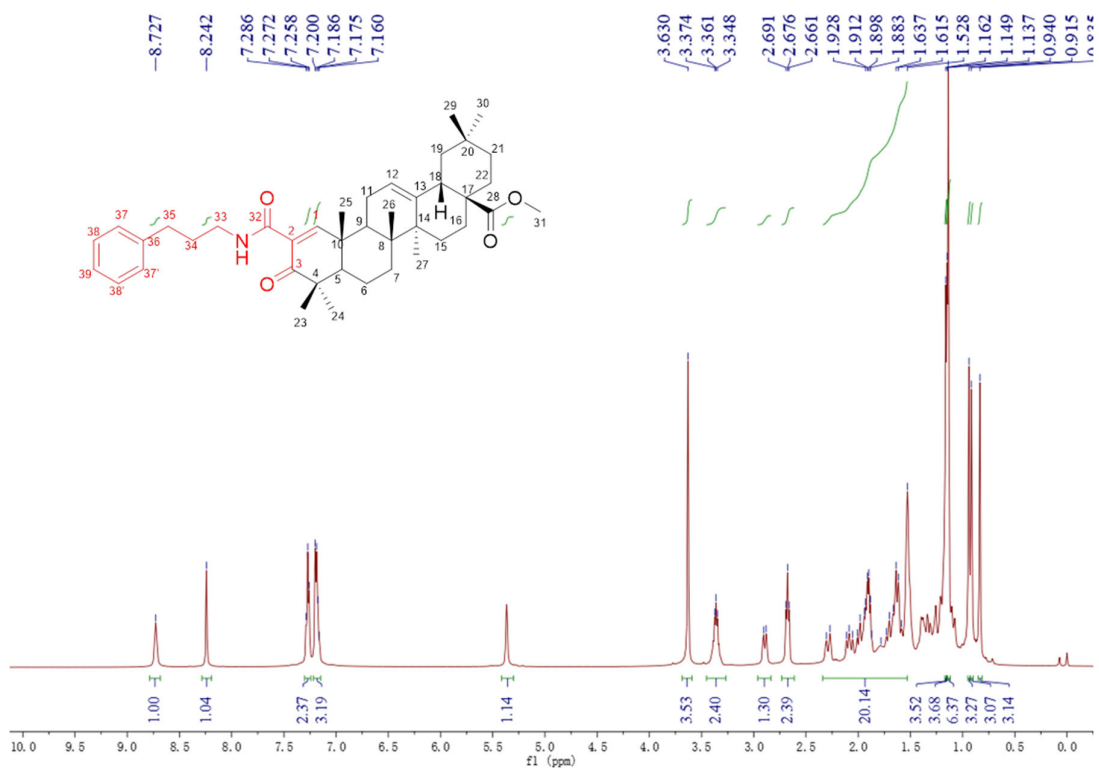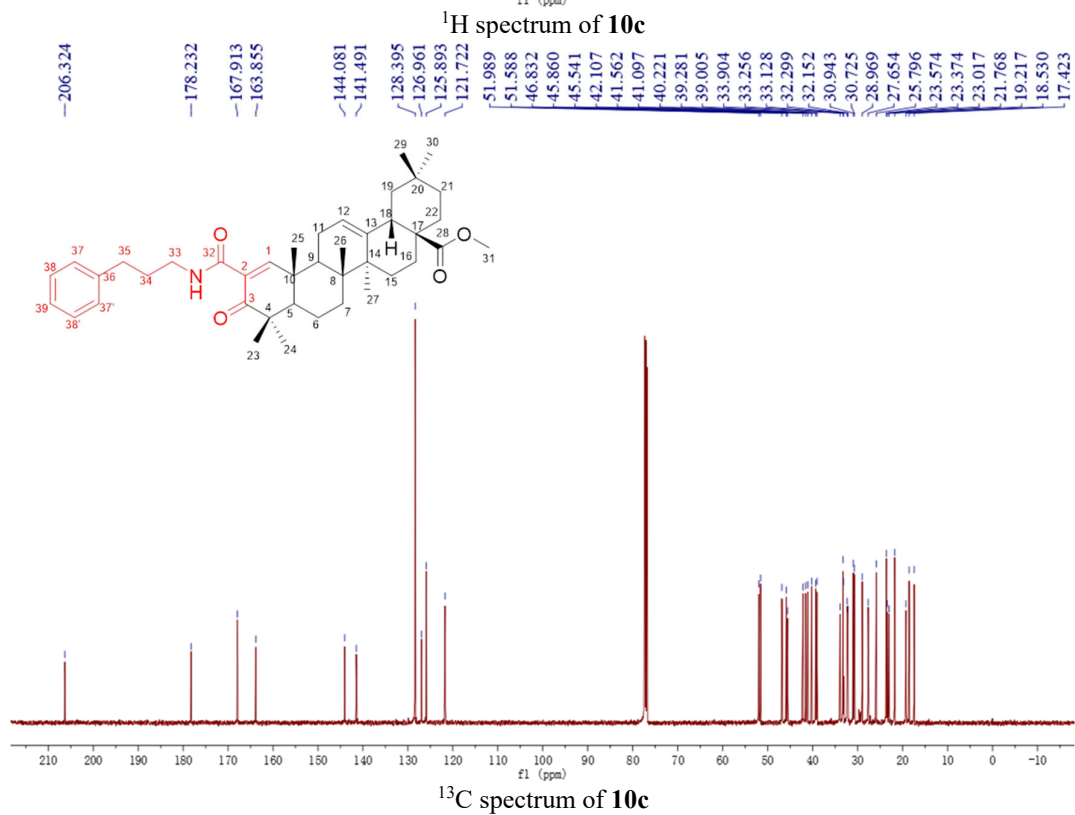

Measured region for 650.4163 m/z

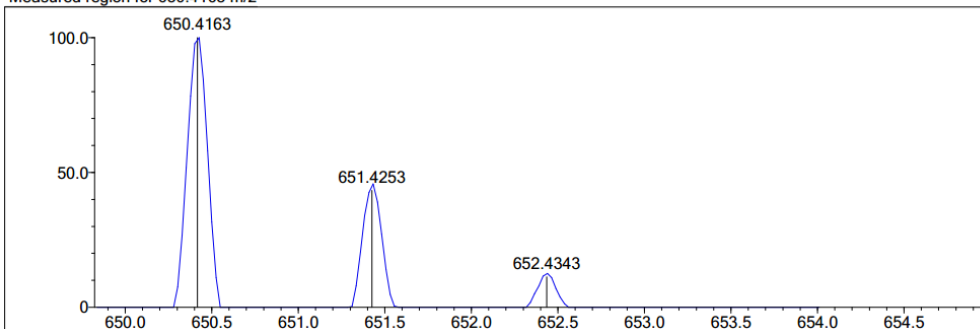

C41 H57 N O4 [M+Na]<sup>+</sup> : Predicted region for 650.4180 m/z

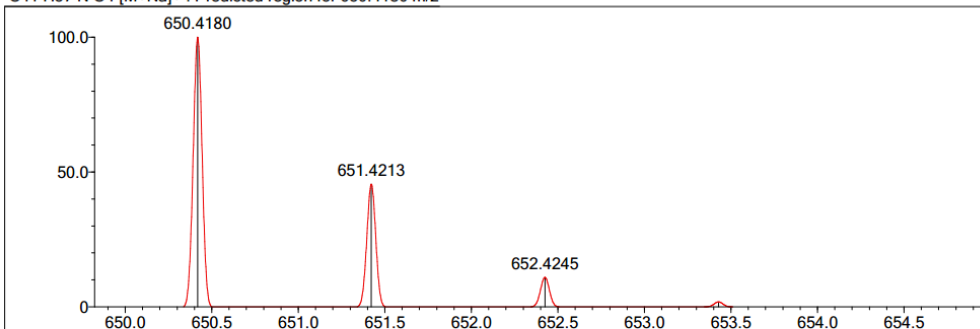

| Rank | Score | Formula (M)  | Ion                 | Meas. m/z | Pred. m/z | Df. (mDa) | Df. (ppm) | Iso   | DBE  |
|------|-------|--------------|---------------------|-----------|-----------|-----------|-----------|-------|------|
| 7    | 88.67 | C41 H57 N O4 | [M+Na] <sup>+</sup> | 650.4163  | 650.4180  | -1.7      | -2.61     | 92.39 | 14.0 |

HRMS spectrum of 10c

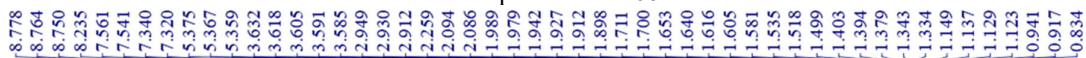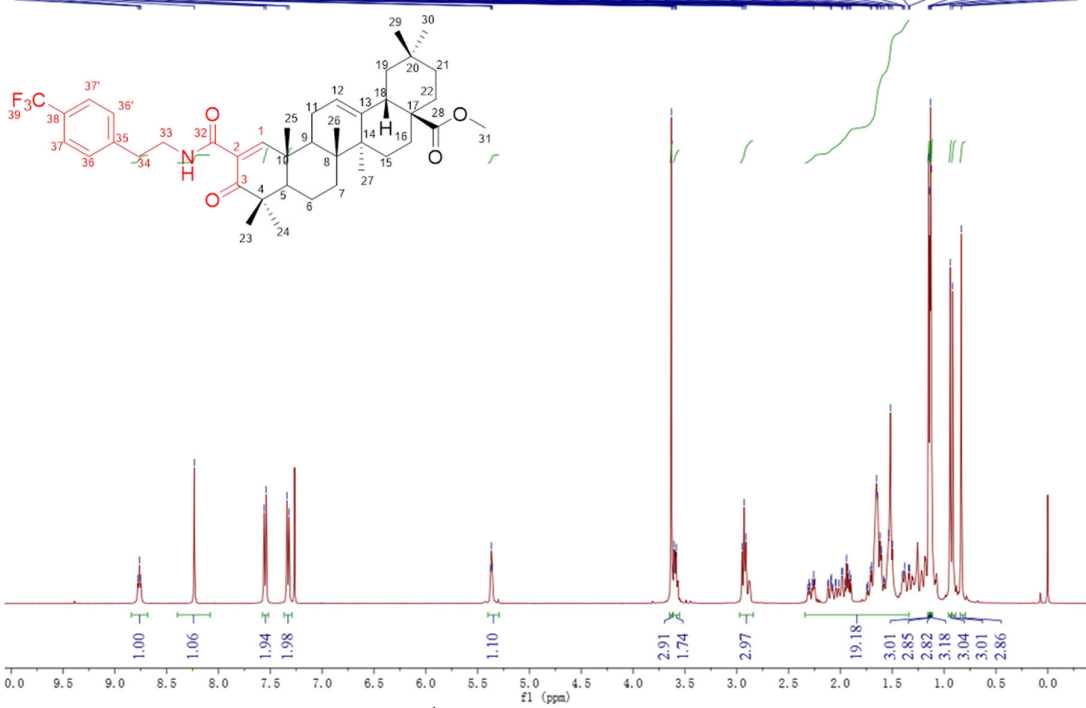

<sup>1</sup>H spectrum of 10d

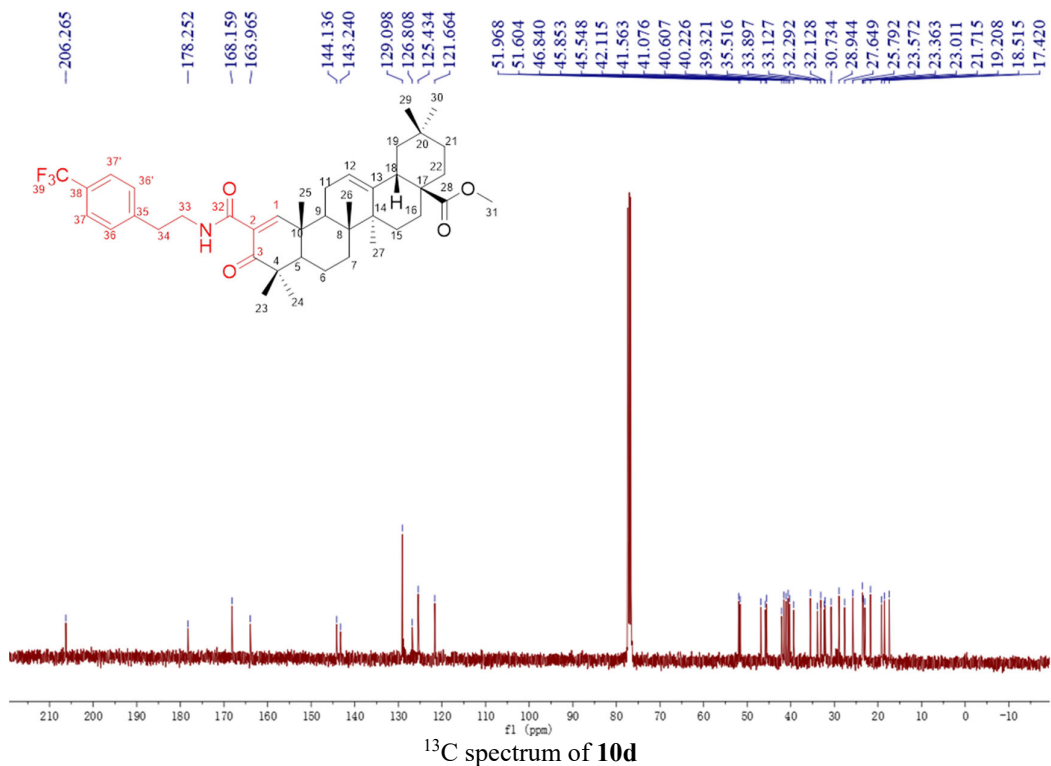

Measured region for 682.4069 m/z

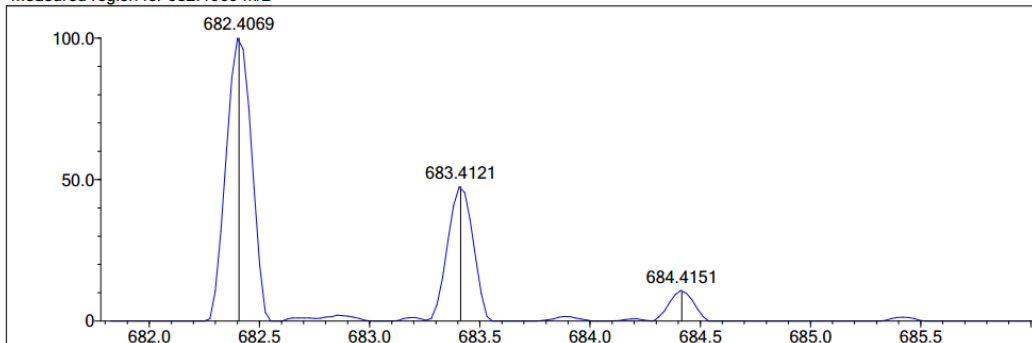

C41 H54 N O4 F3 [M+H]<sup>+</sup> : Predicted region for 682.4078 m/z

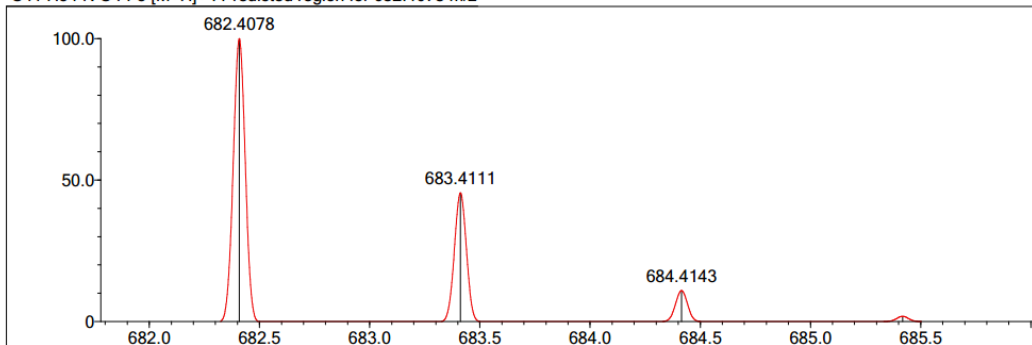

| Rank | Score | Formula (M)     | Ion                | Meas. m/z | Pred. m/z | Df. (mDa) | Df. (ppm) | Iso    | DBE  |
|------|-------|-----------------|--------------------|-----------|-----------|-----------|-----------|--------|------|
| 6    | 99.20 | C41 H54 N O4 F3 | [M+H] <sup>+</sup> | 682.4069  | 682.4078  | -0.9      | -1.32     | 100.00 | 14.0 |

HRMS spectrum of **10d**
